# Supplementary material for: Synthetic versatility of 2-substituted-6-methyl 2,3-dihydropyridinones in the synthesis of polyfunctional piperidine-based compounds and related β amino acid derivatives
Source: Royal Society of Chemistry journal article supplement (doi:10.1039/c7ob01948c), 2017-01-01

## SUPPORTING INFORMATION FOR

**Synthetic Versatility of 2-Substituted-6-methyl 2,3-dihydropyridinones accessed via the Vinylogous Mannich Reaction in the Construction of Chiral Polyfunctional Piperidine-based Compounds and  $\beta$  Amino Acid Derivatives**

**Yang Yang\***, Clayton Hardman

Genomics Institute of the Novartis Research Foundation

10675 John Jay Hopkins Drive, San Diego, California 92121

[yyang@gnf.org](mailto:yyang@gnf.org)

### TABLE OF CONTENTS:

NMR spectra copy of compounds **10a-i; 12; 13; 14b-e; 15a-e; 16a-e; 17; 18; 19; 20; 21; 22a-d; 23a-b; 24a-b; 25a-g; 26a-g; 27; 28.**

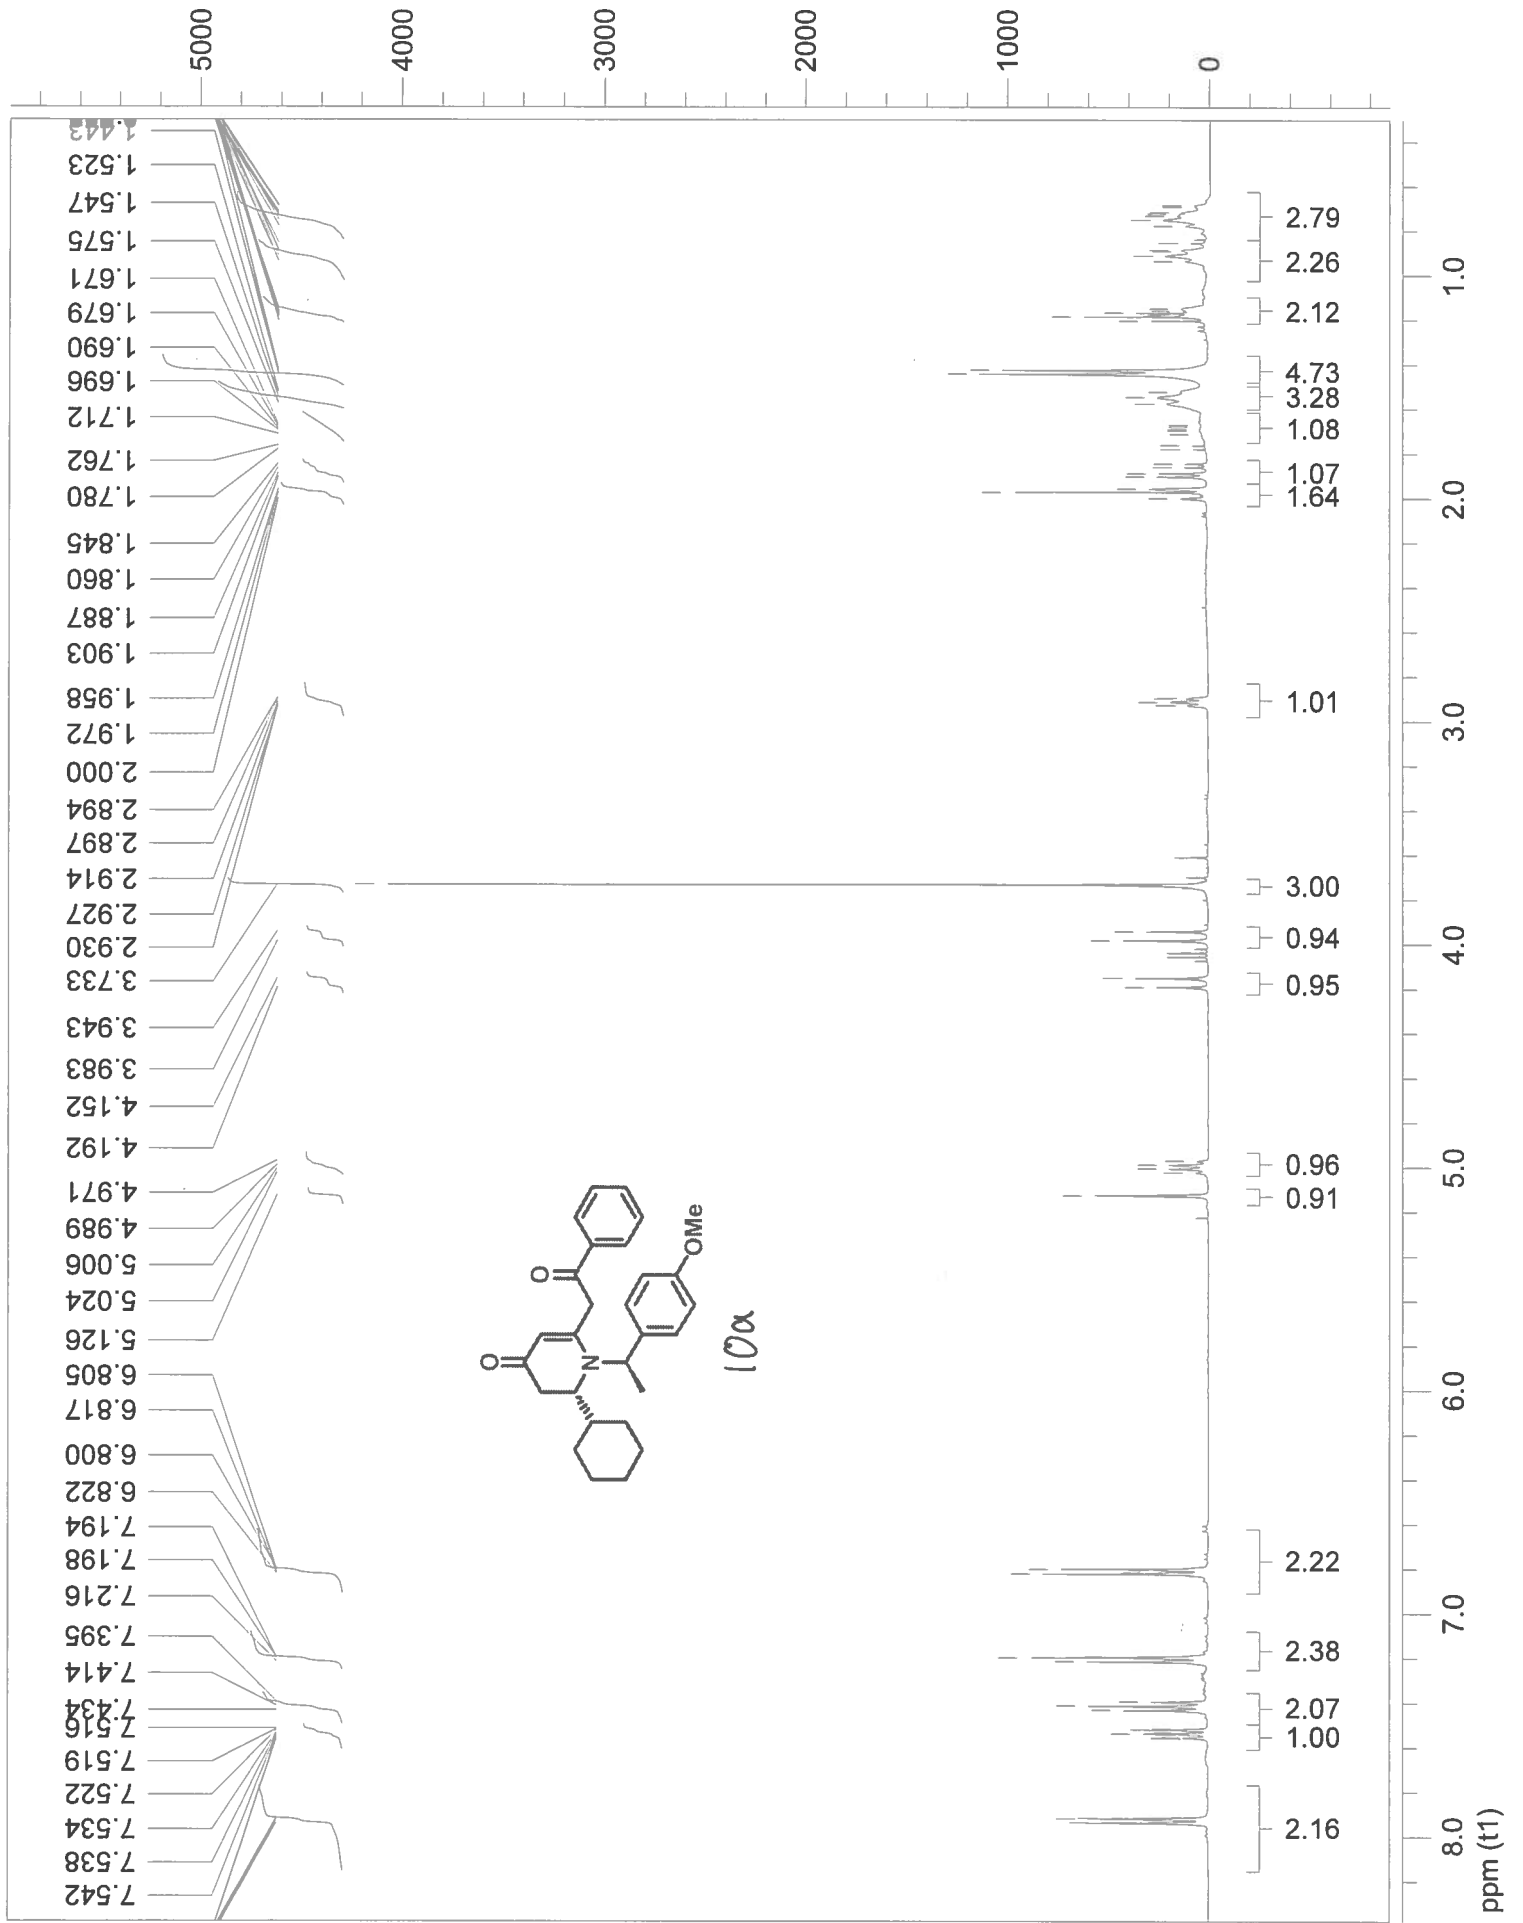

1D — None —

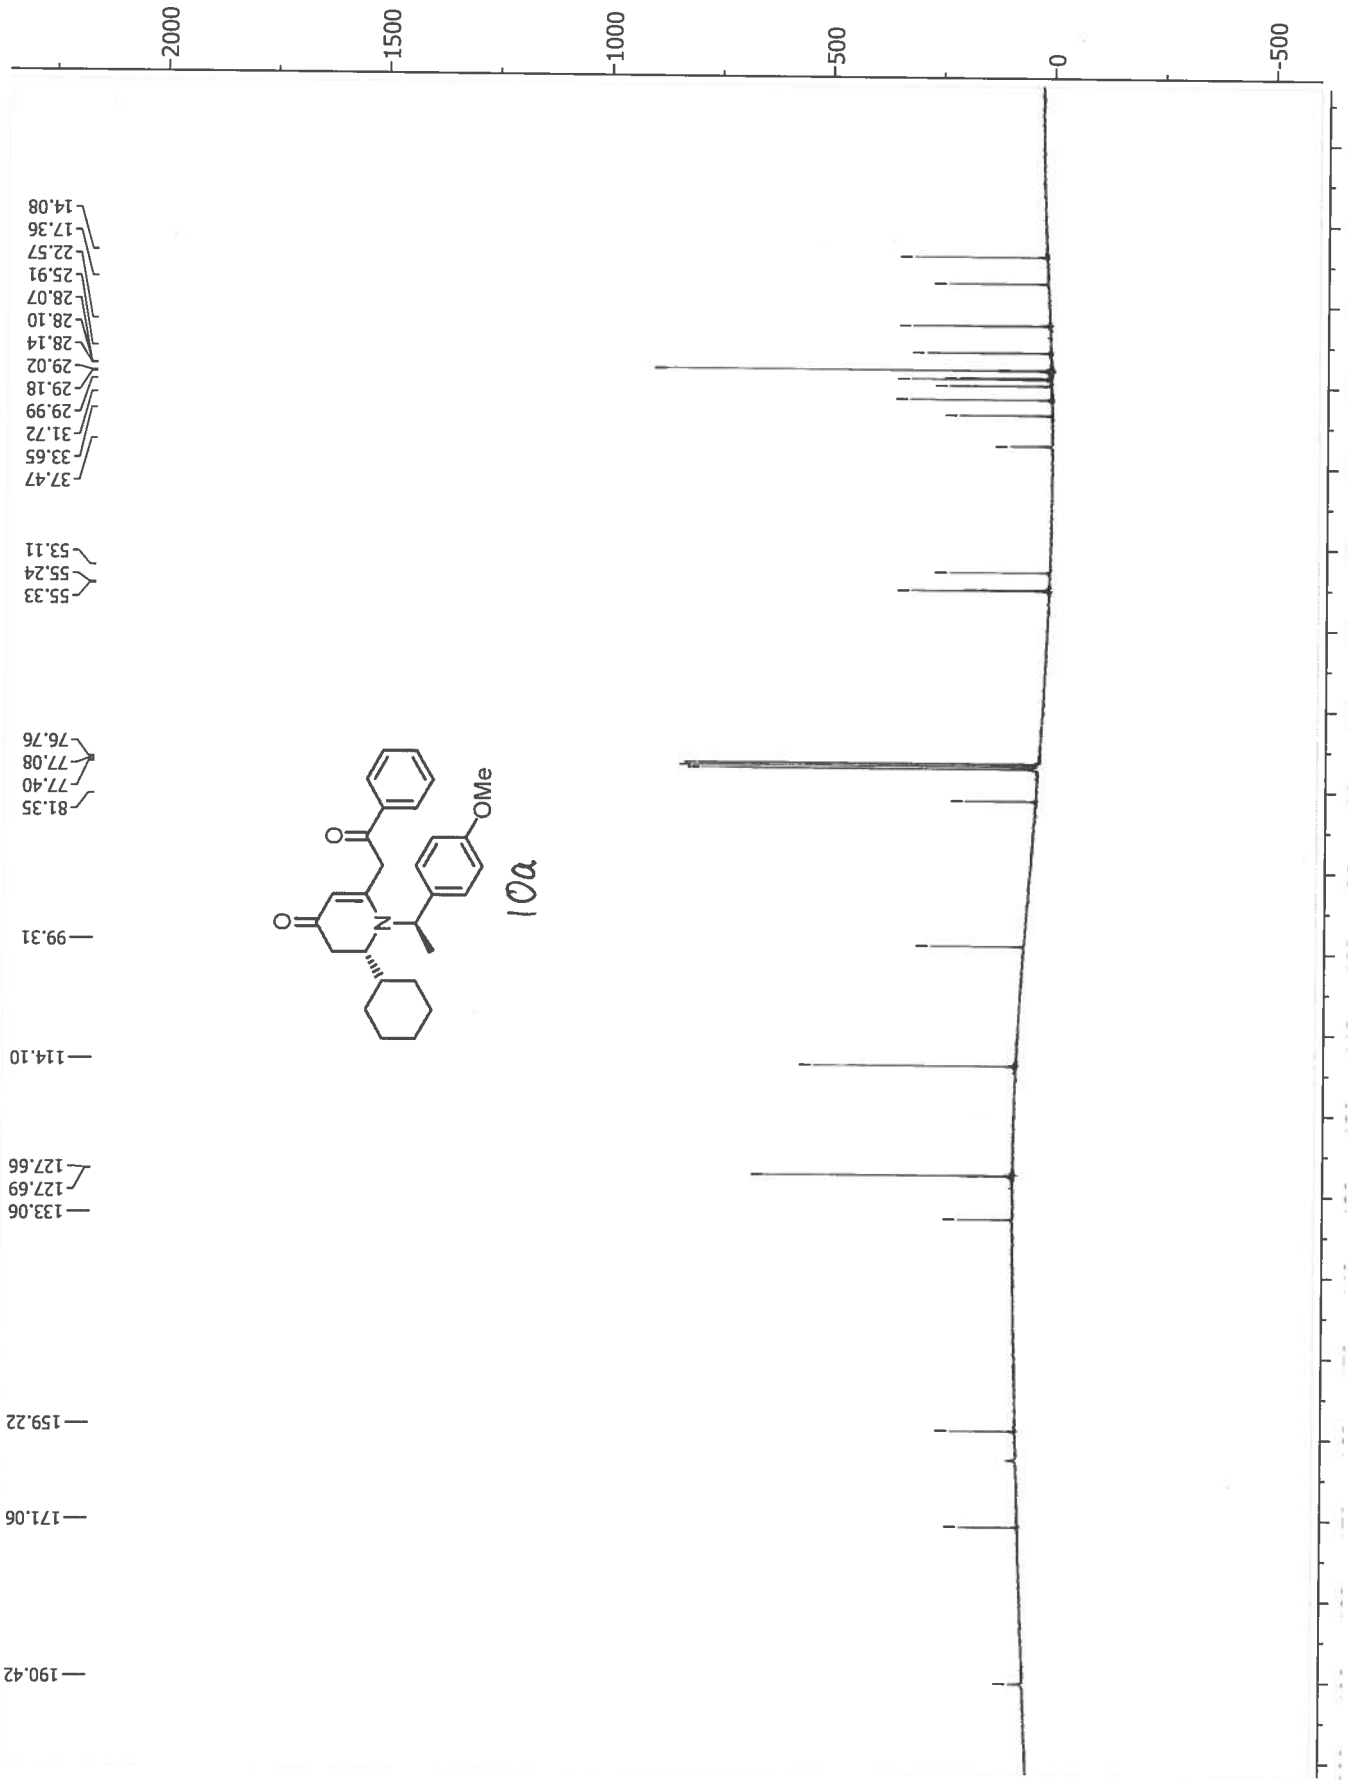

1D — yy-10-vc-74.1.fid —

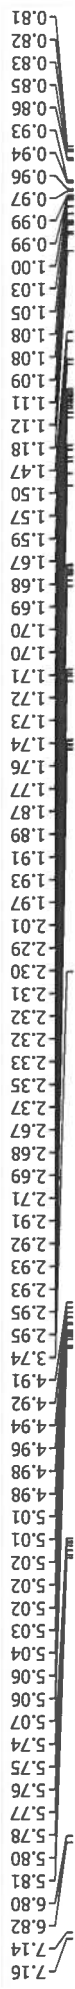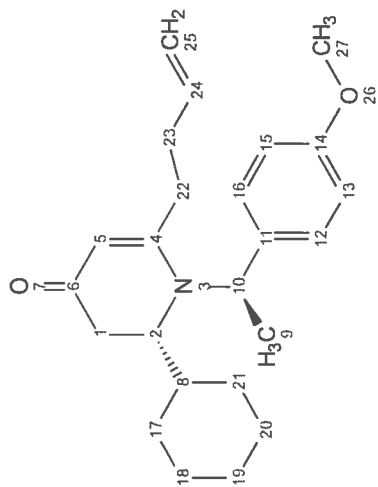

10b

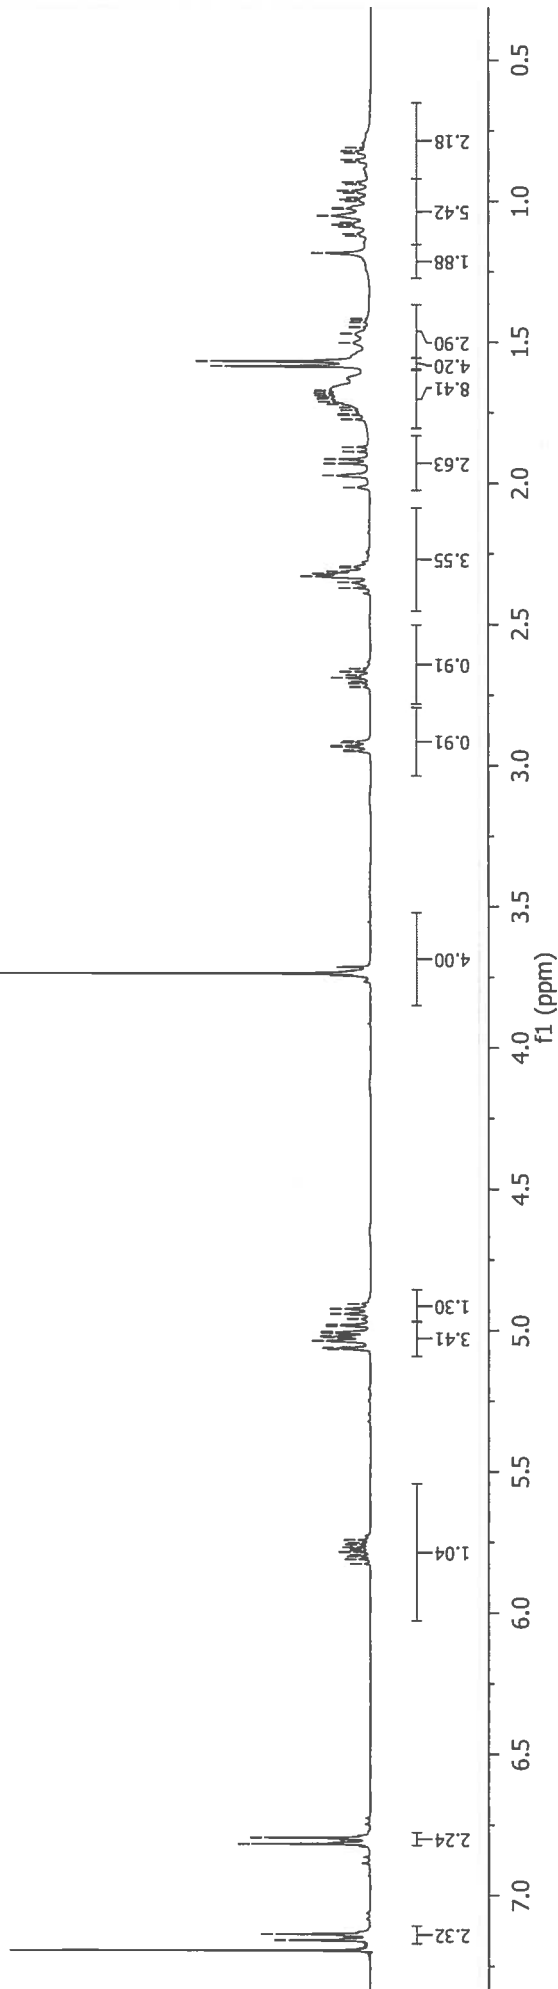

yy-10-vc-74.2.fid

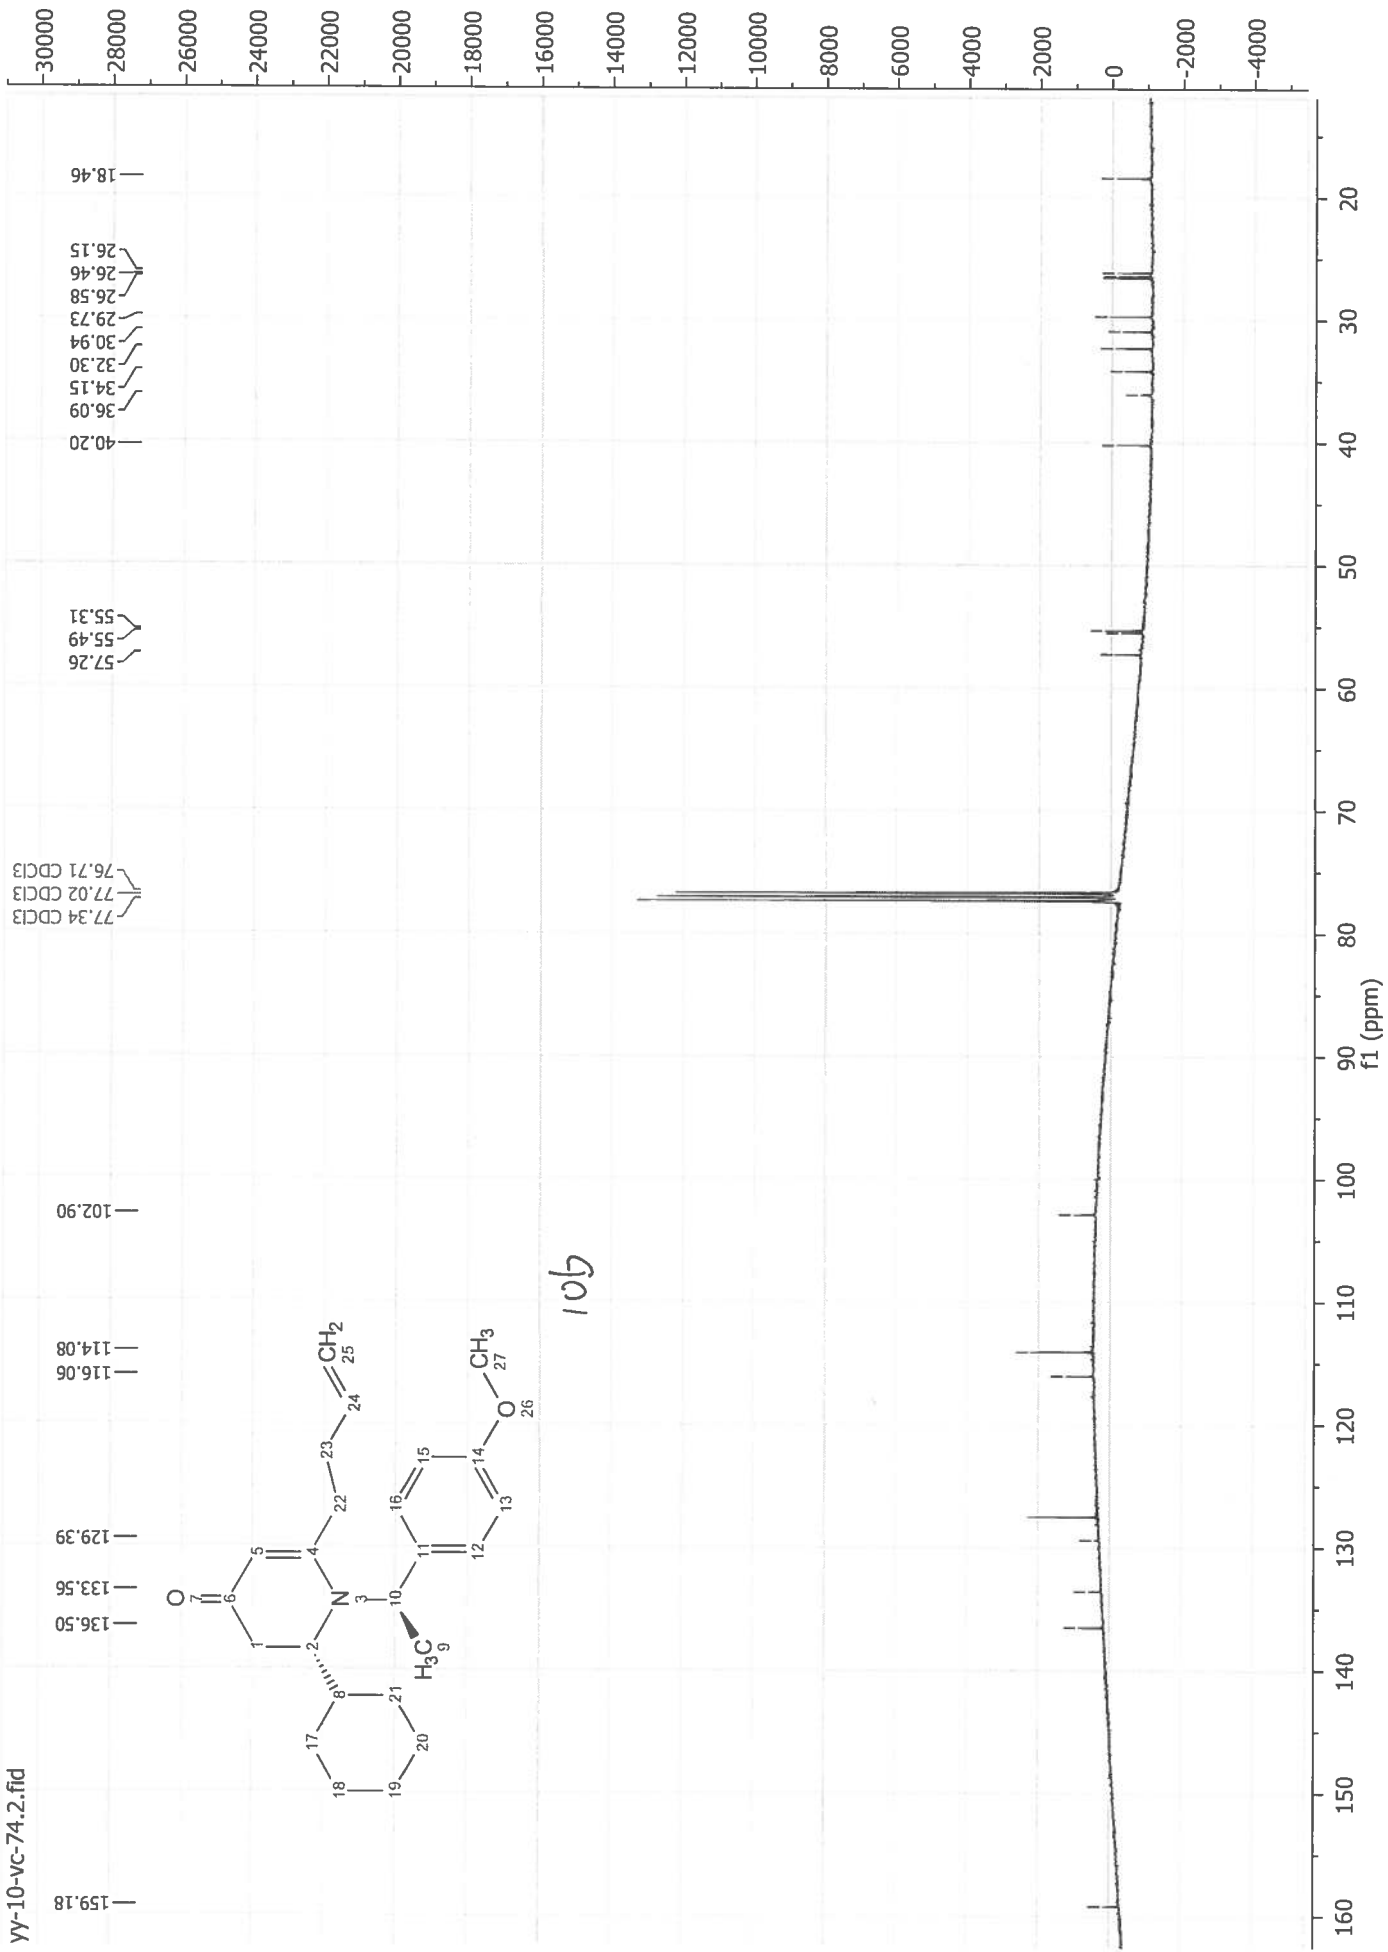

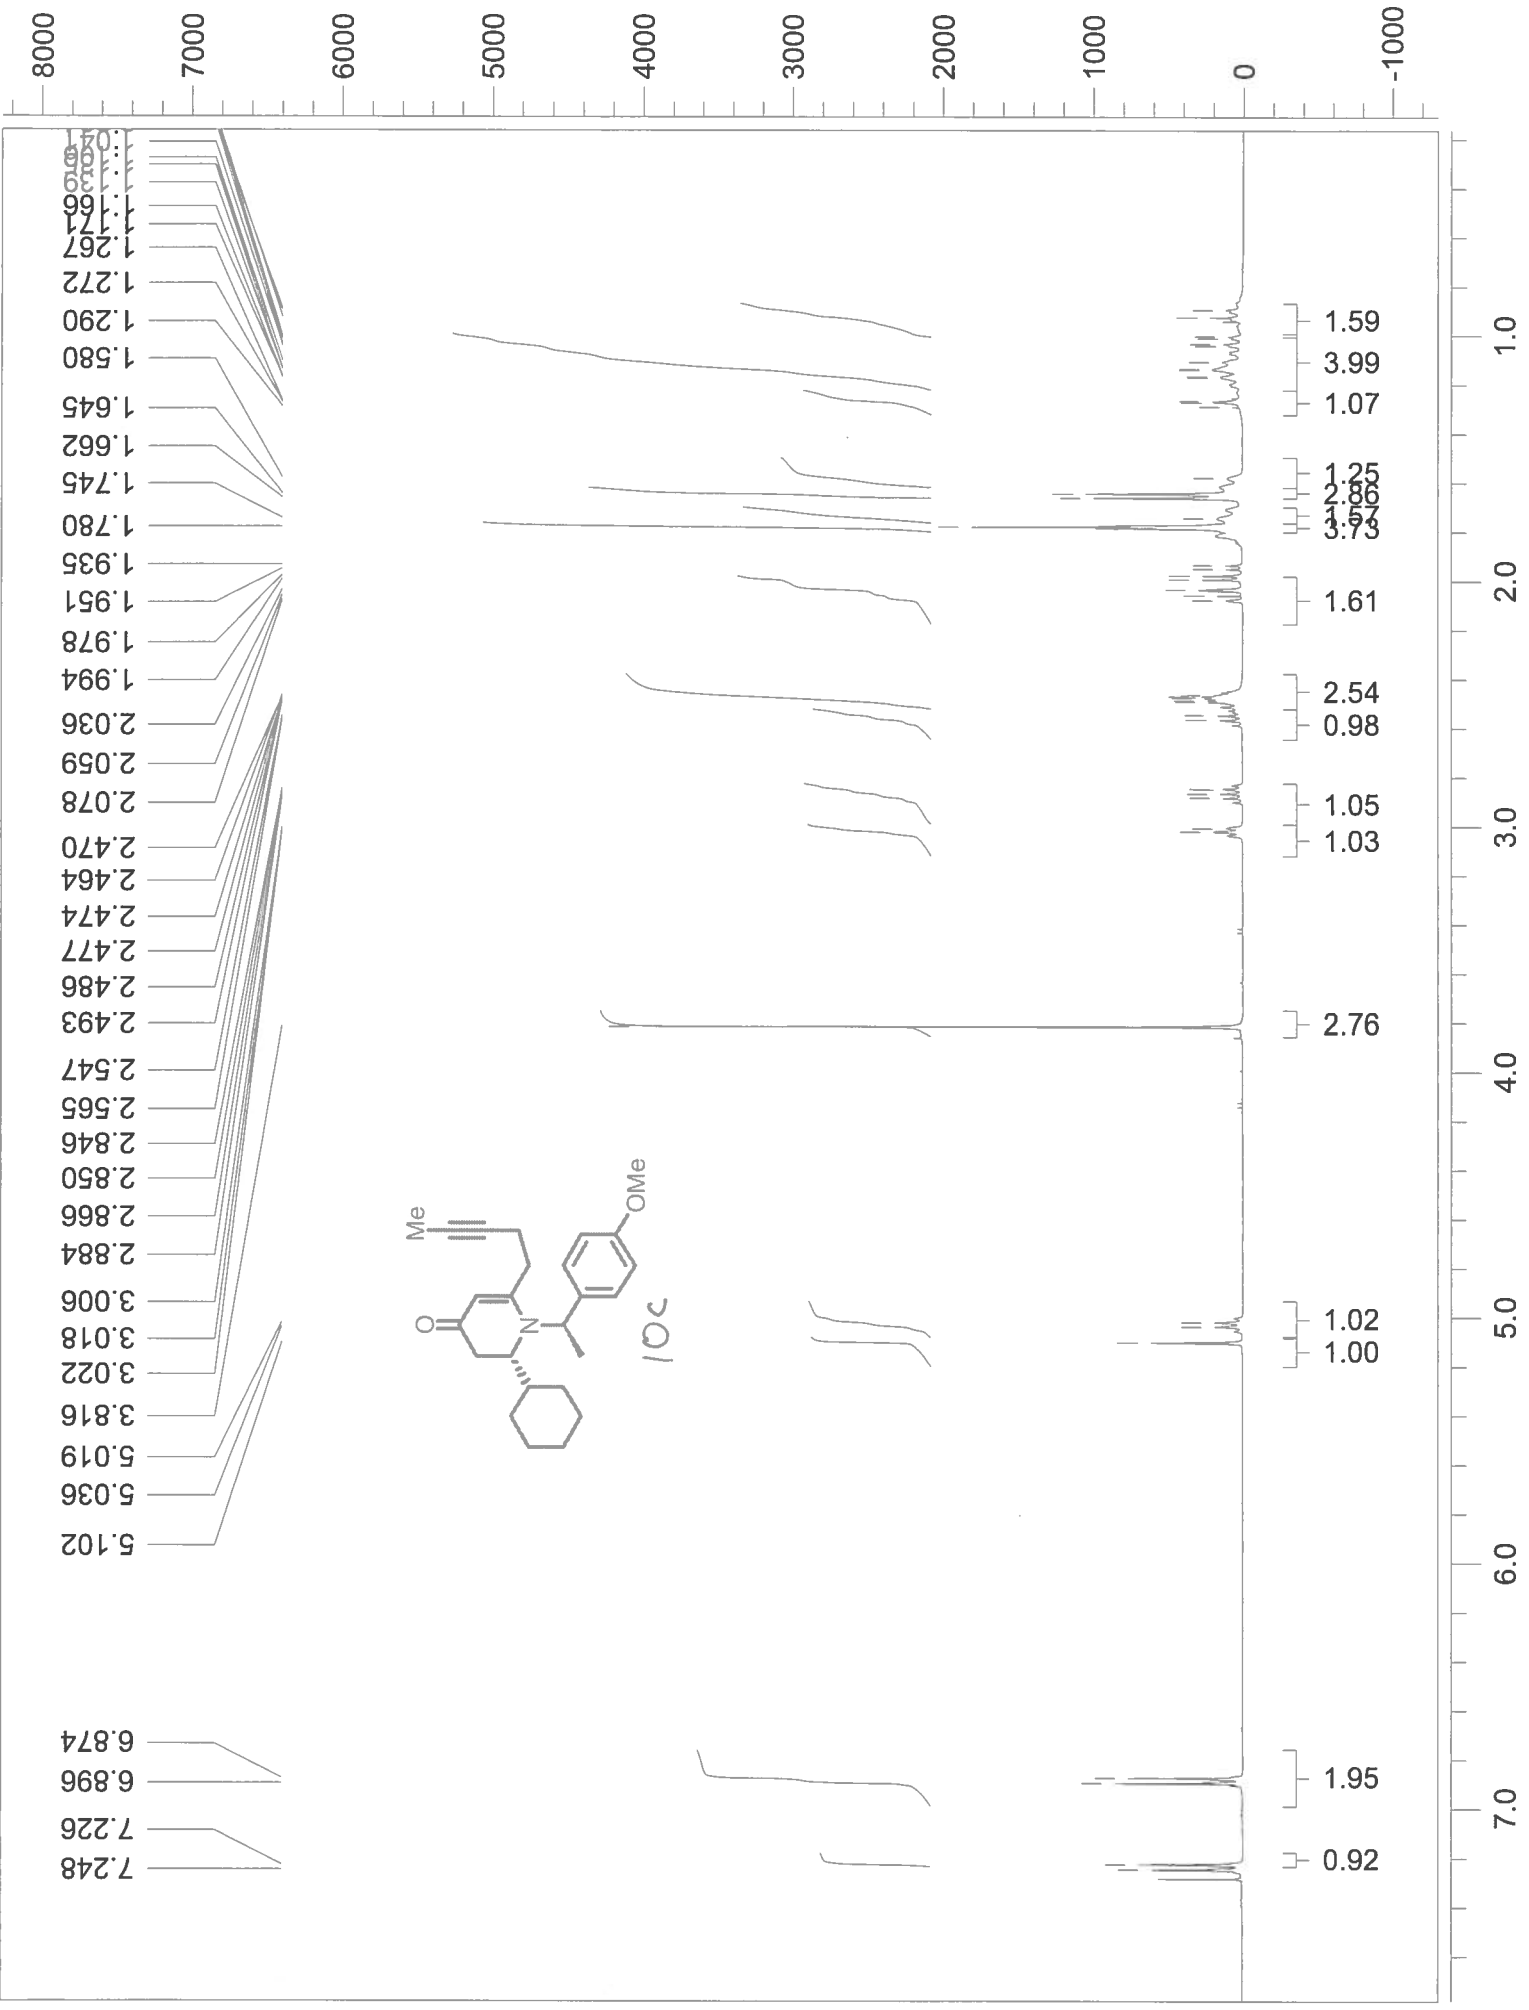

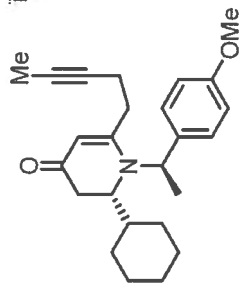

100

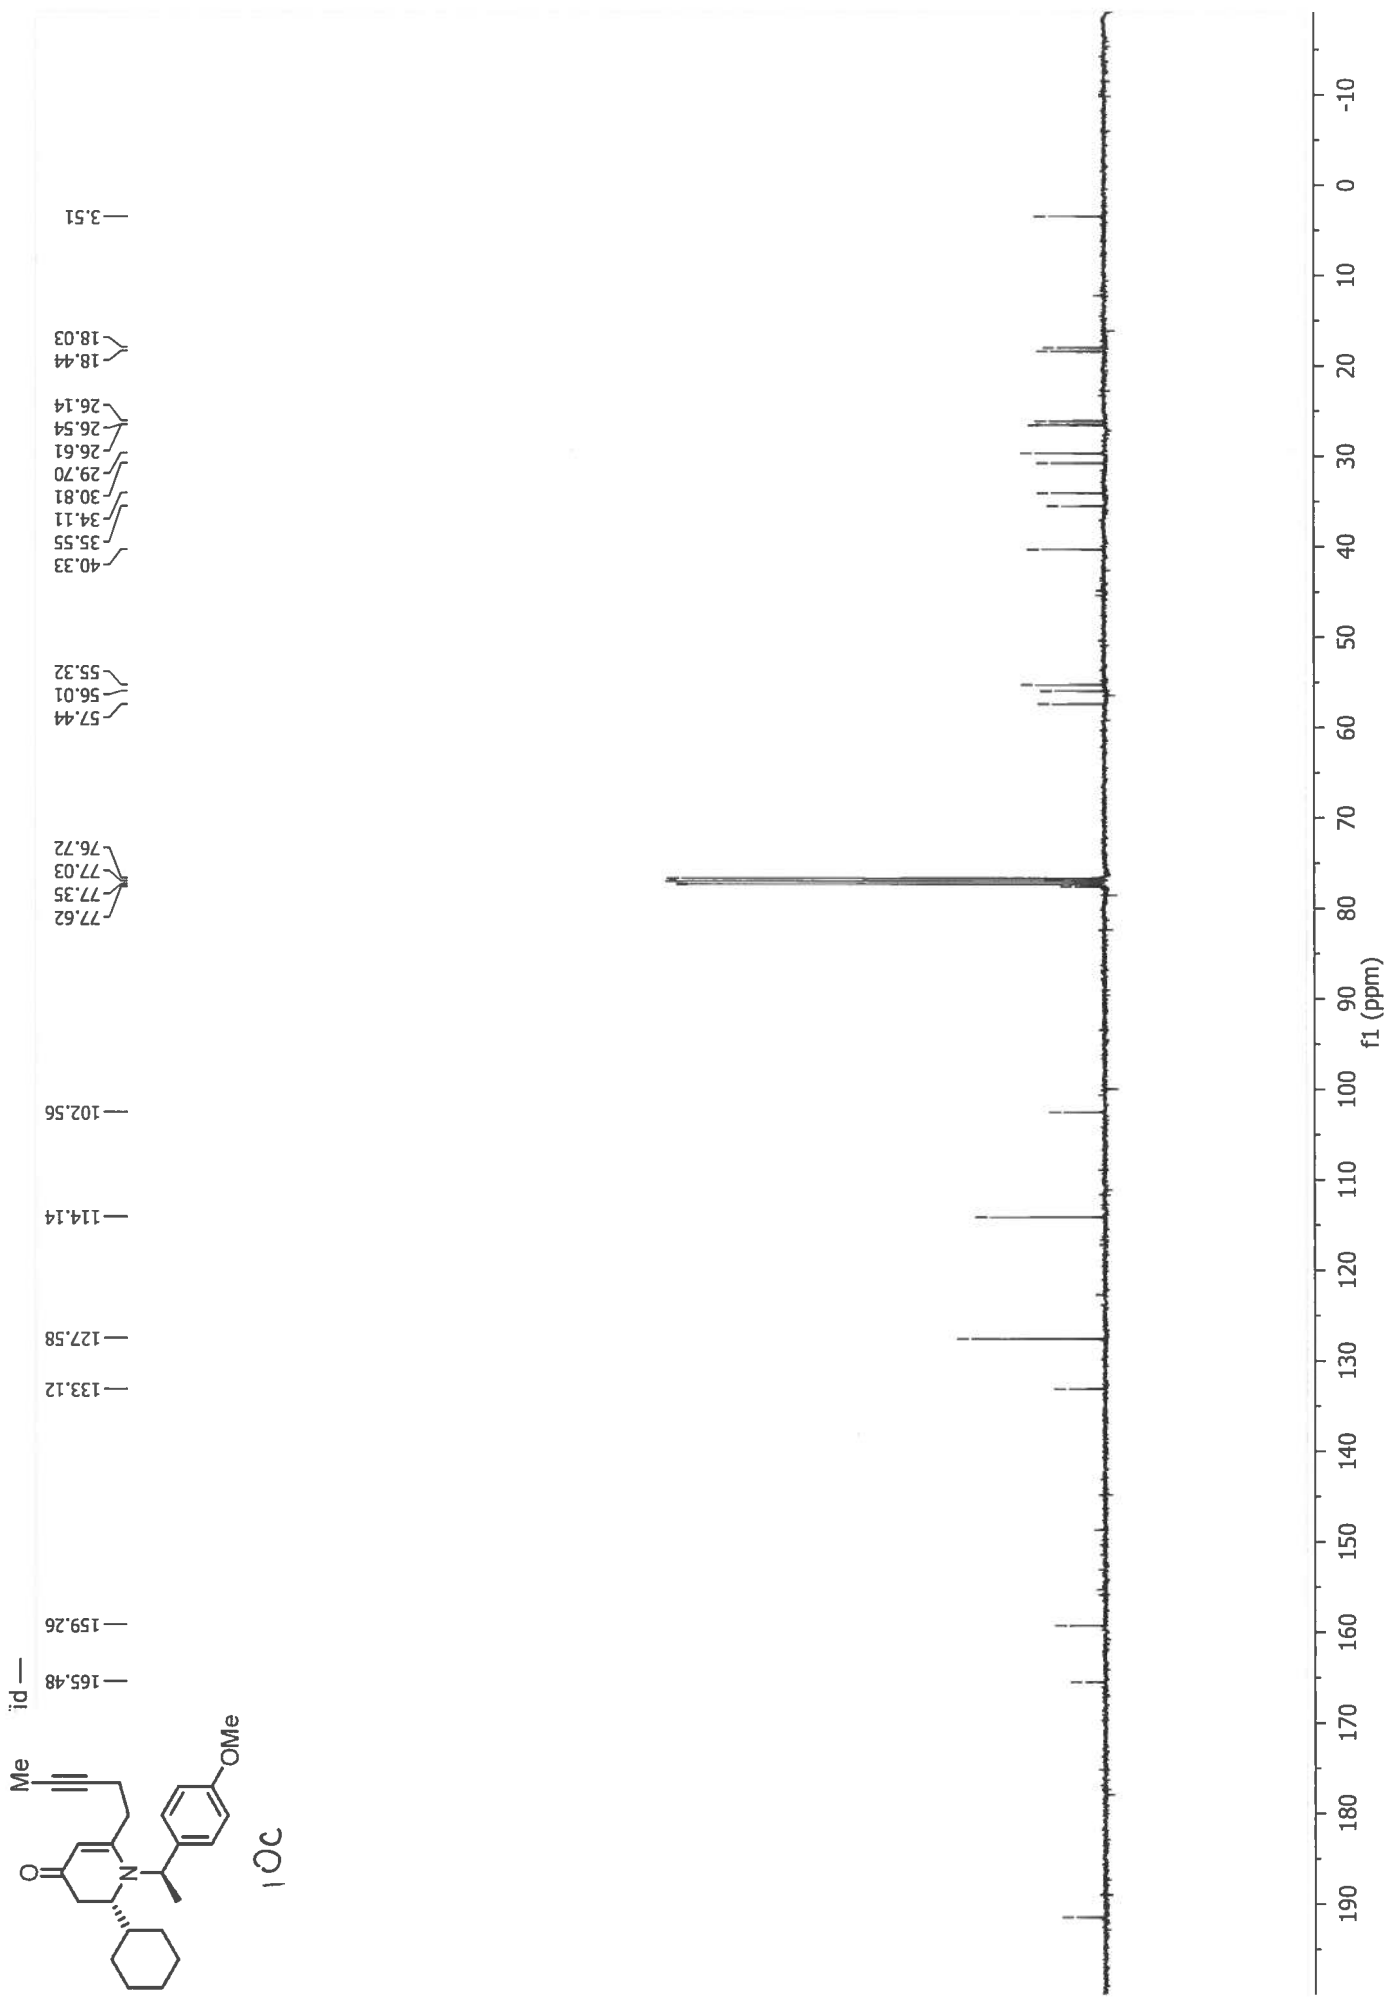

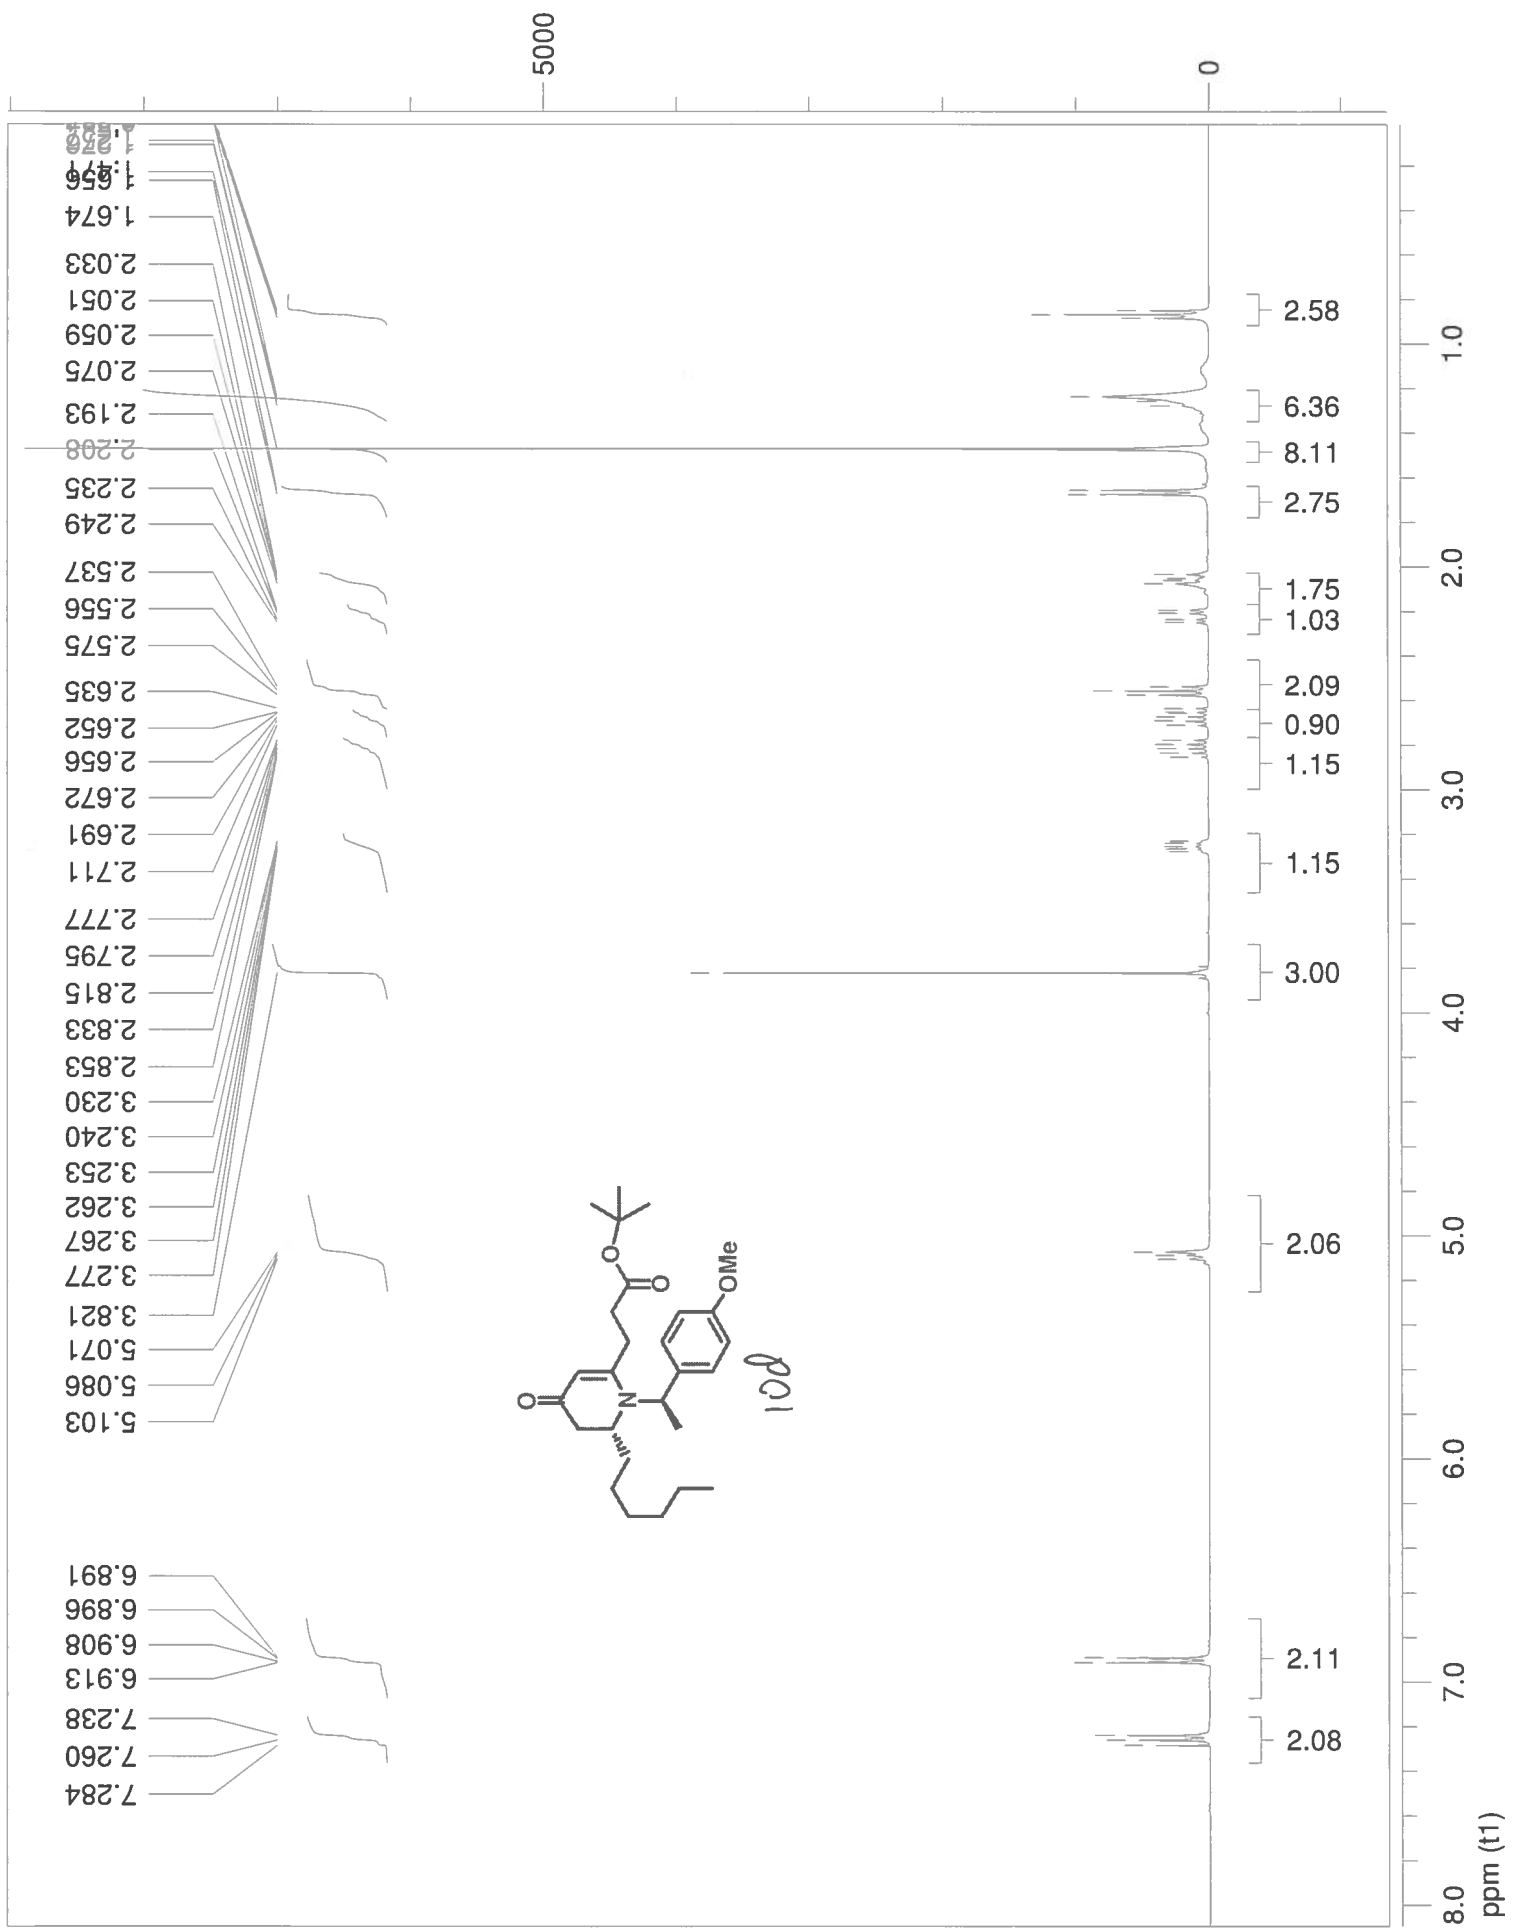



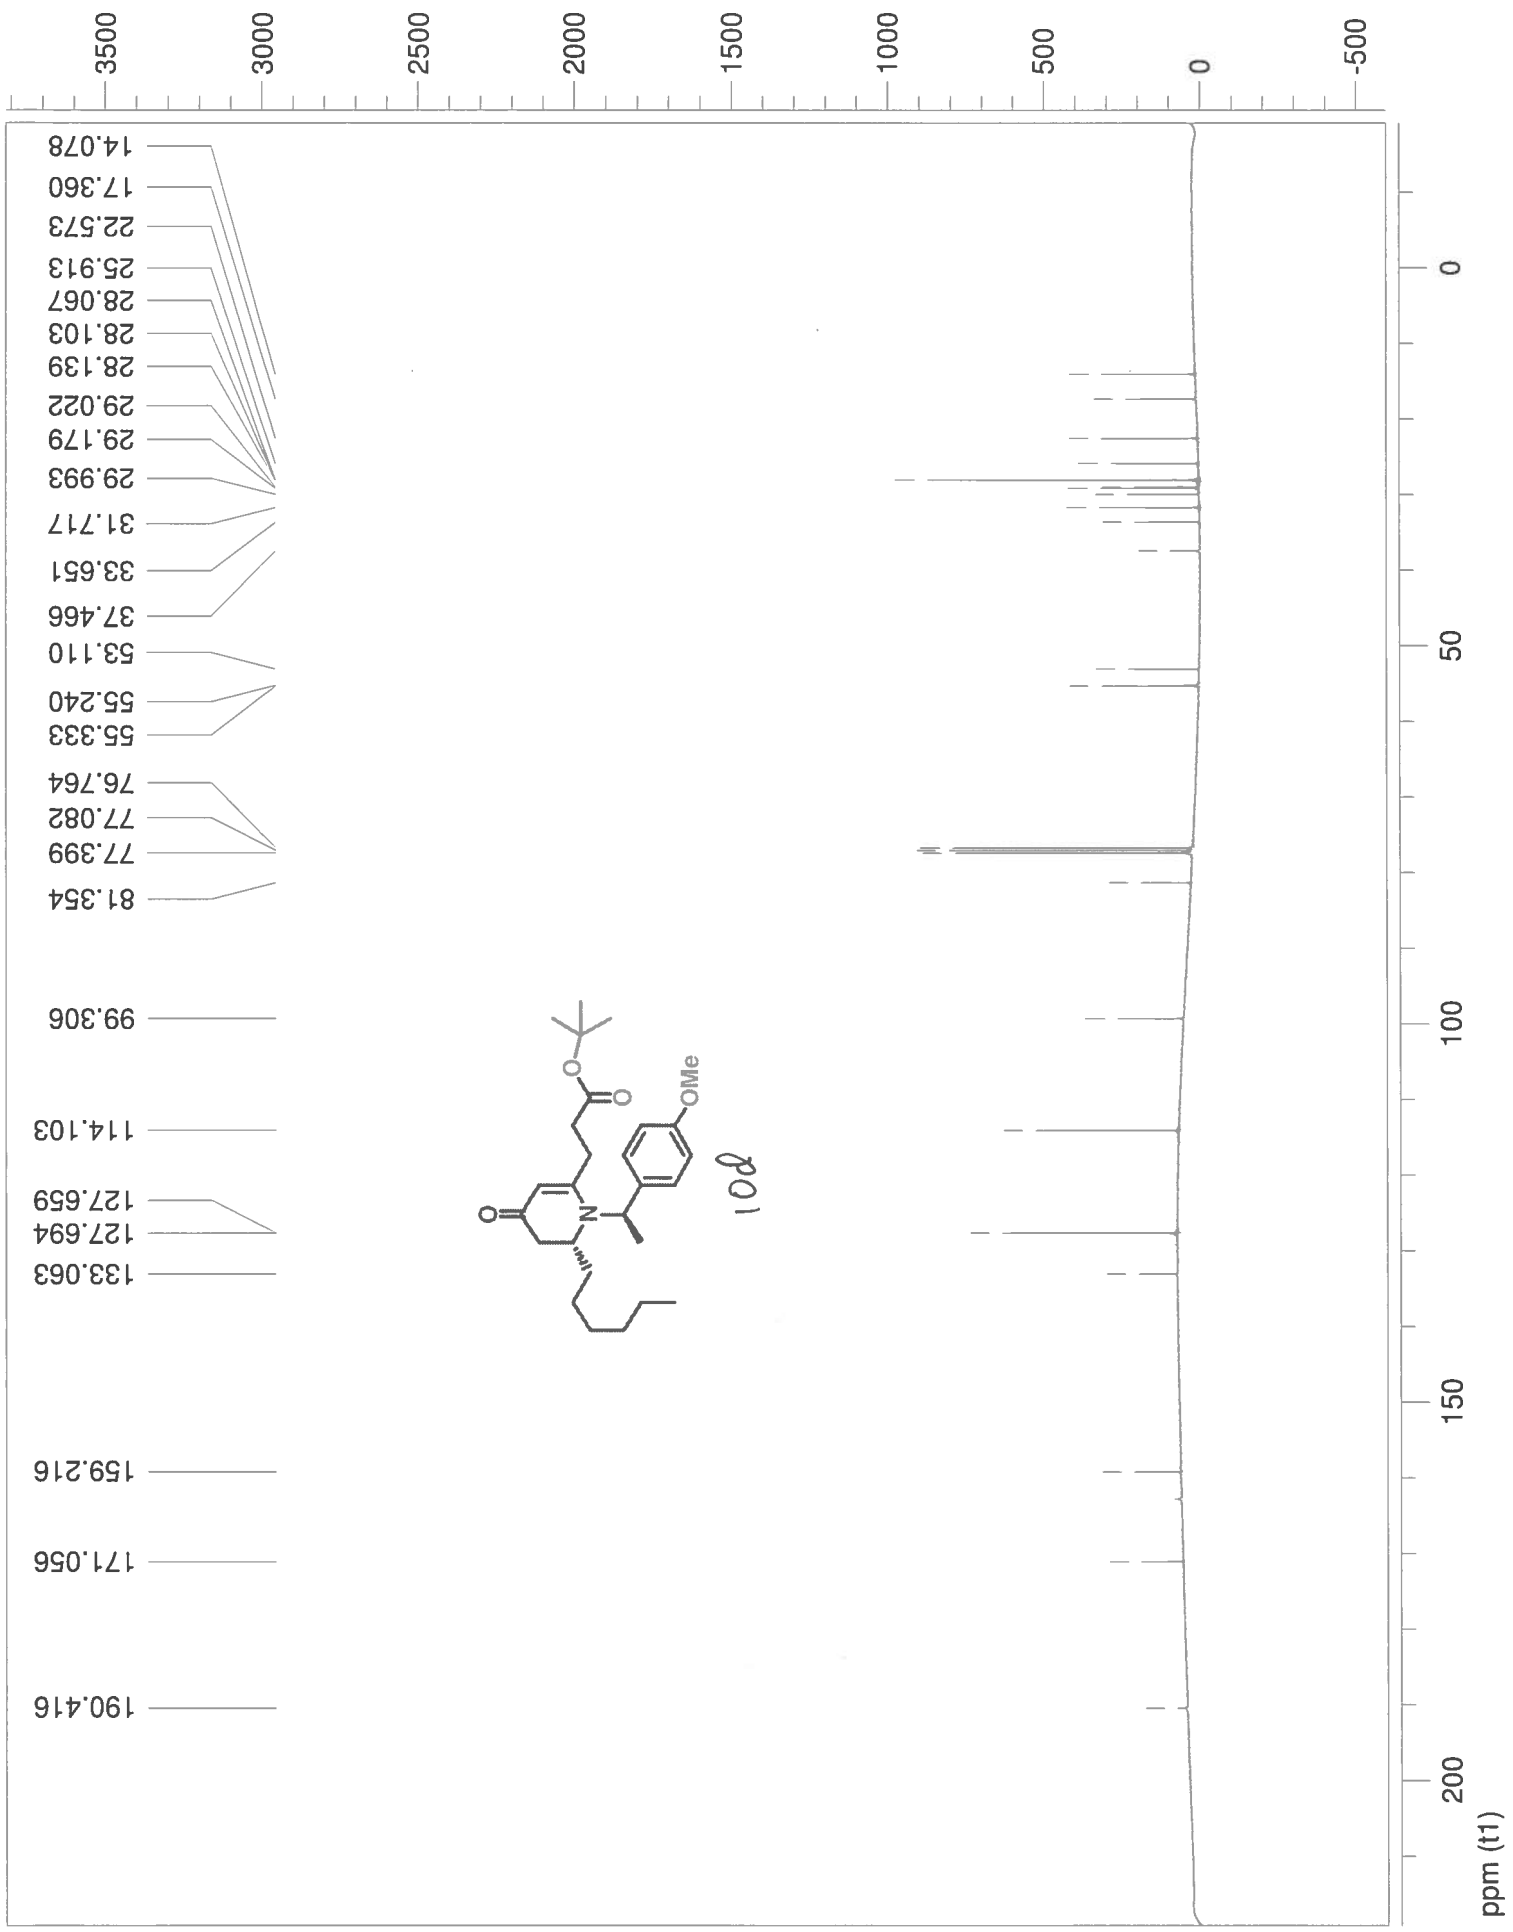

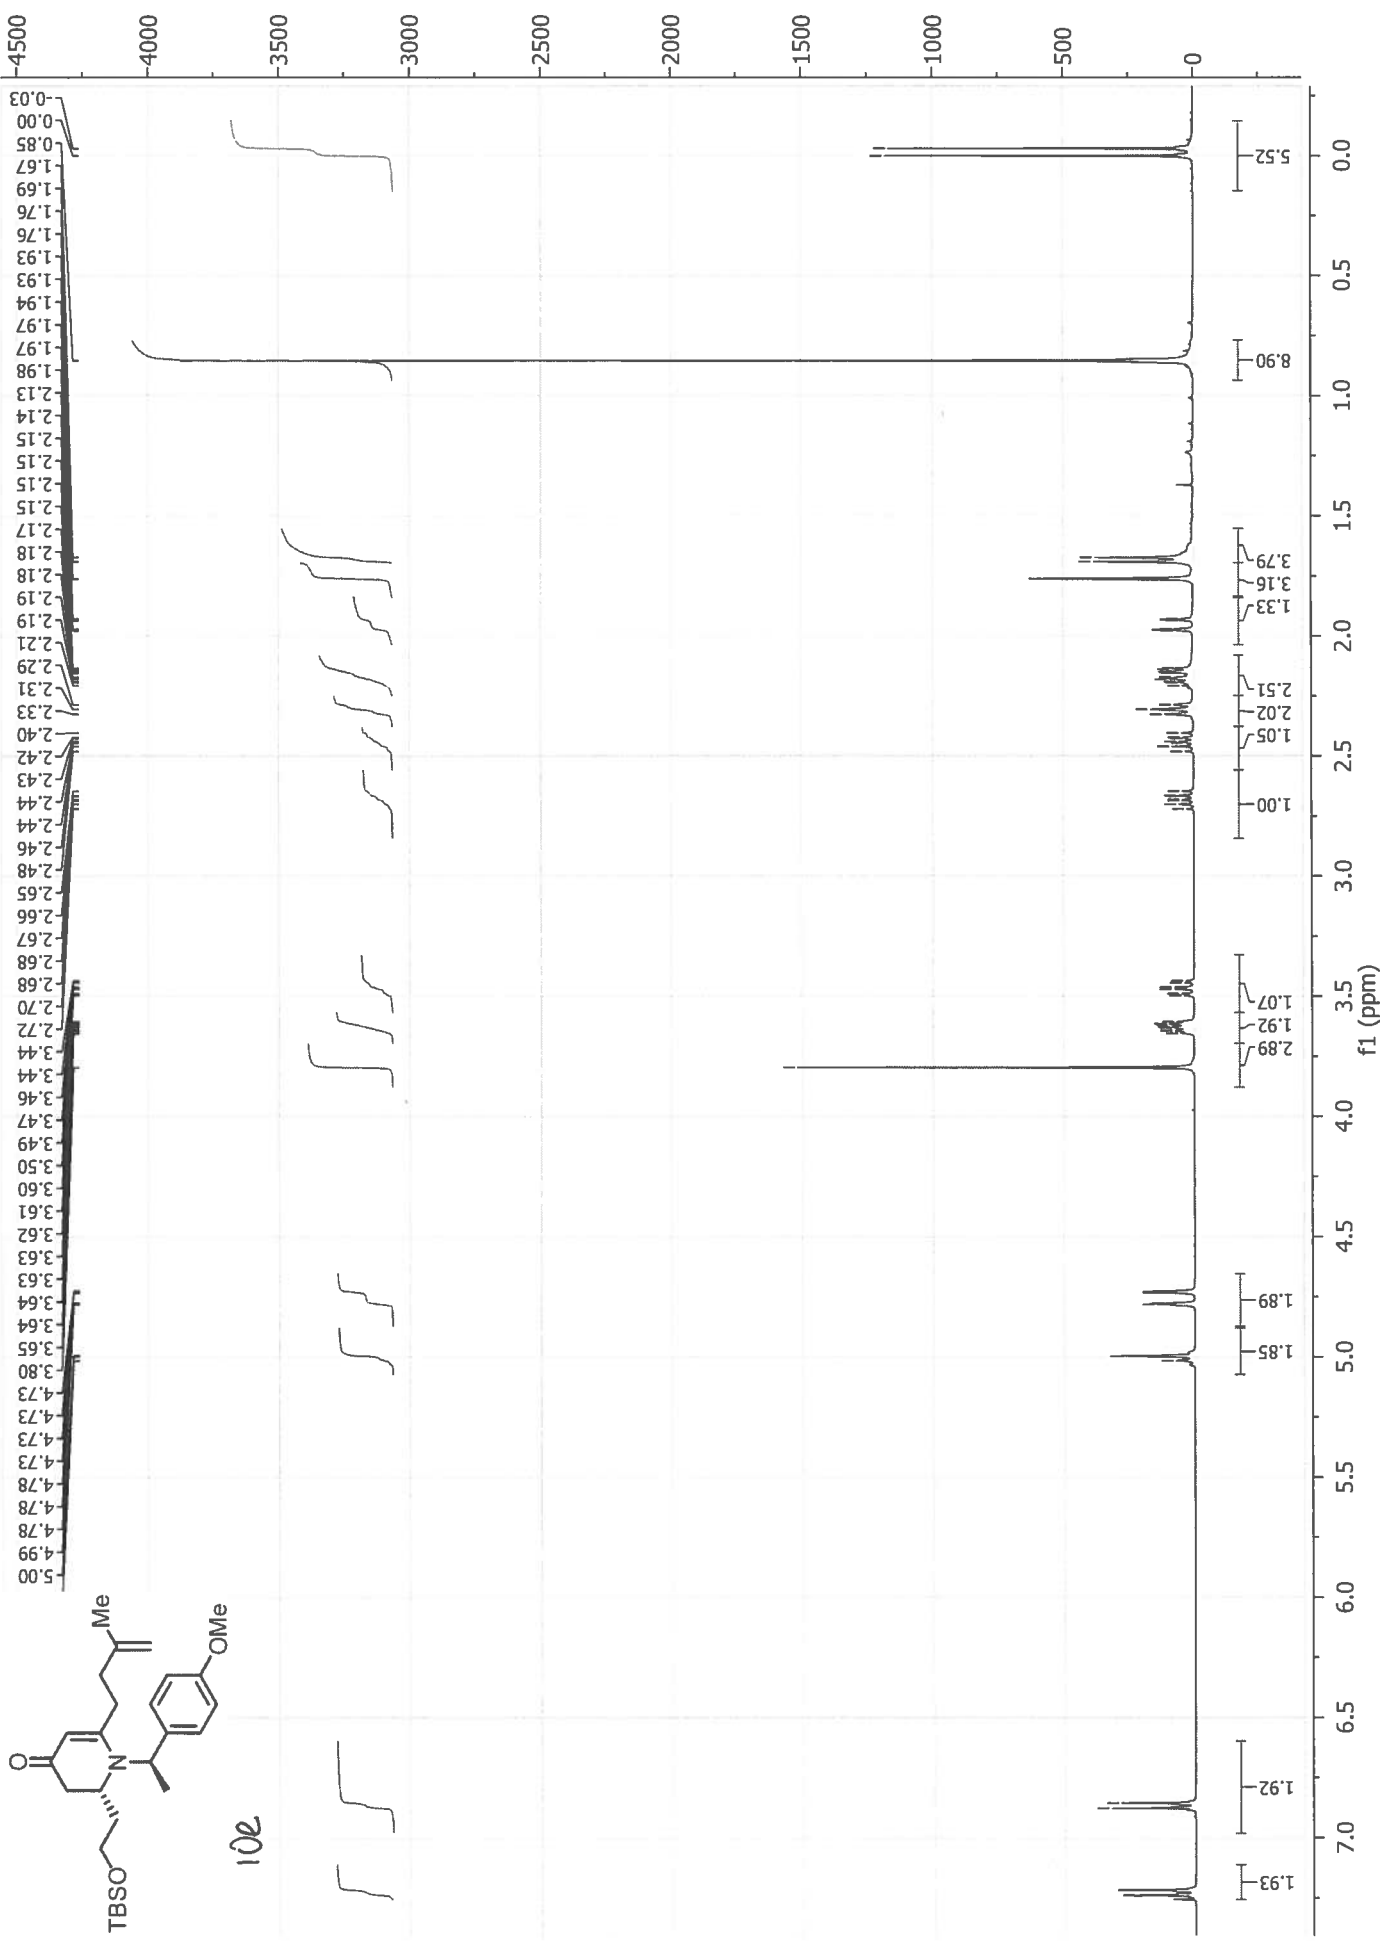

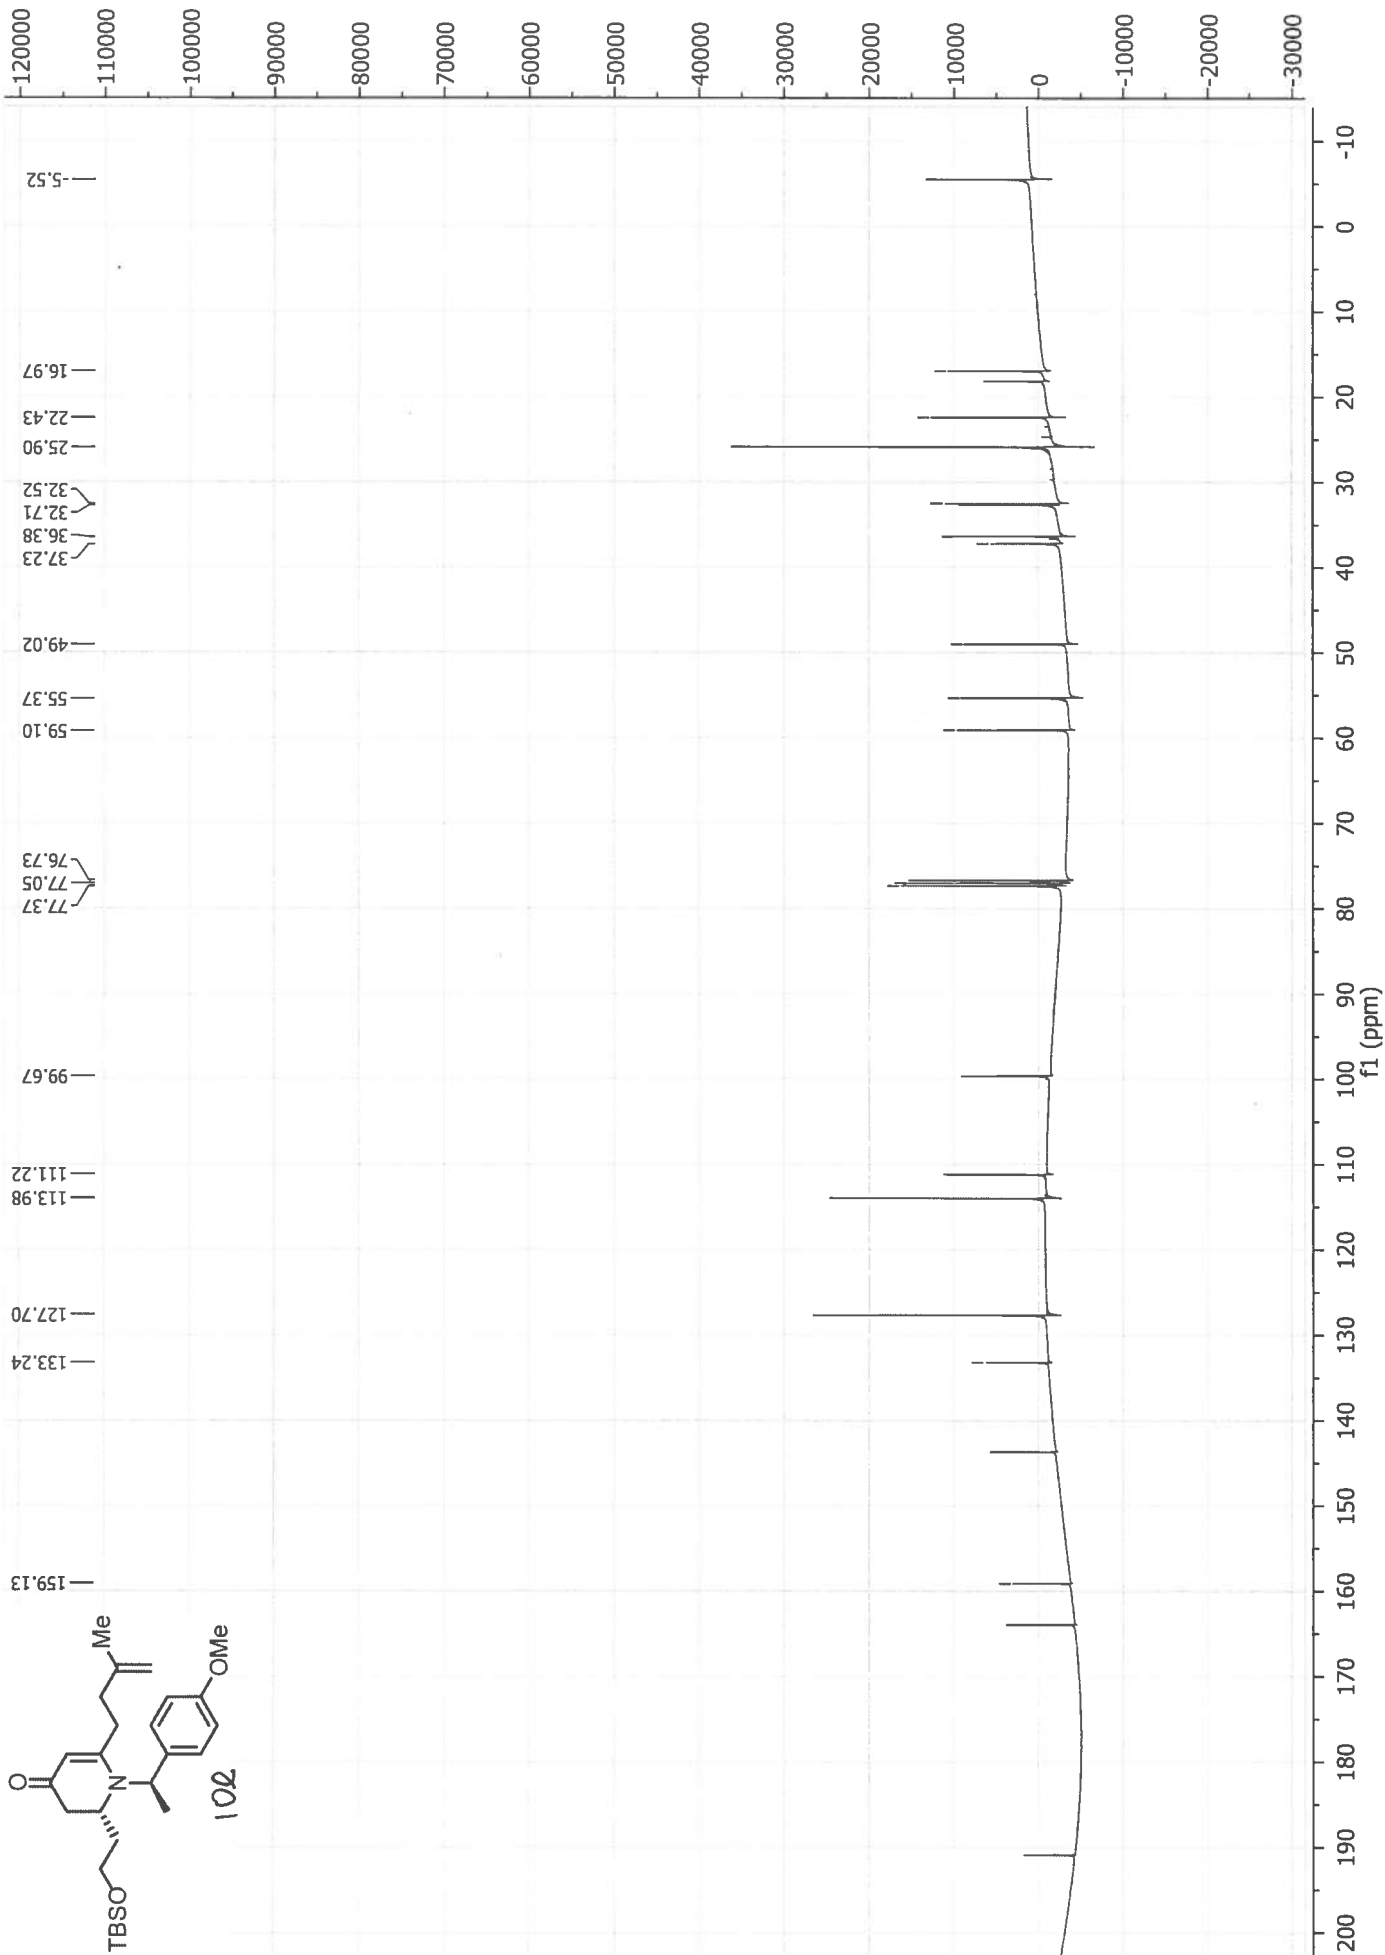

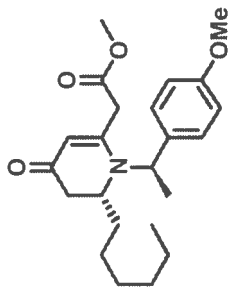

Chemical Formula:  $C_{23}H_{33}NO_4$

Exact Mass: 387.24096

Molecular Weight: 387.52000

10f

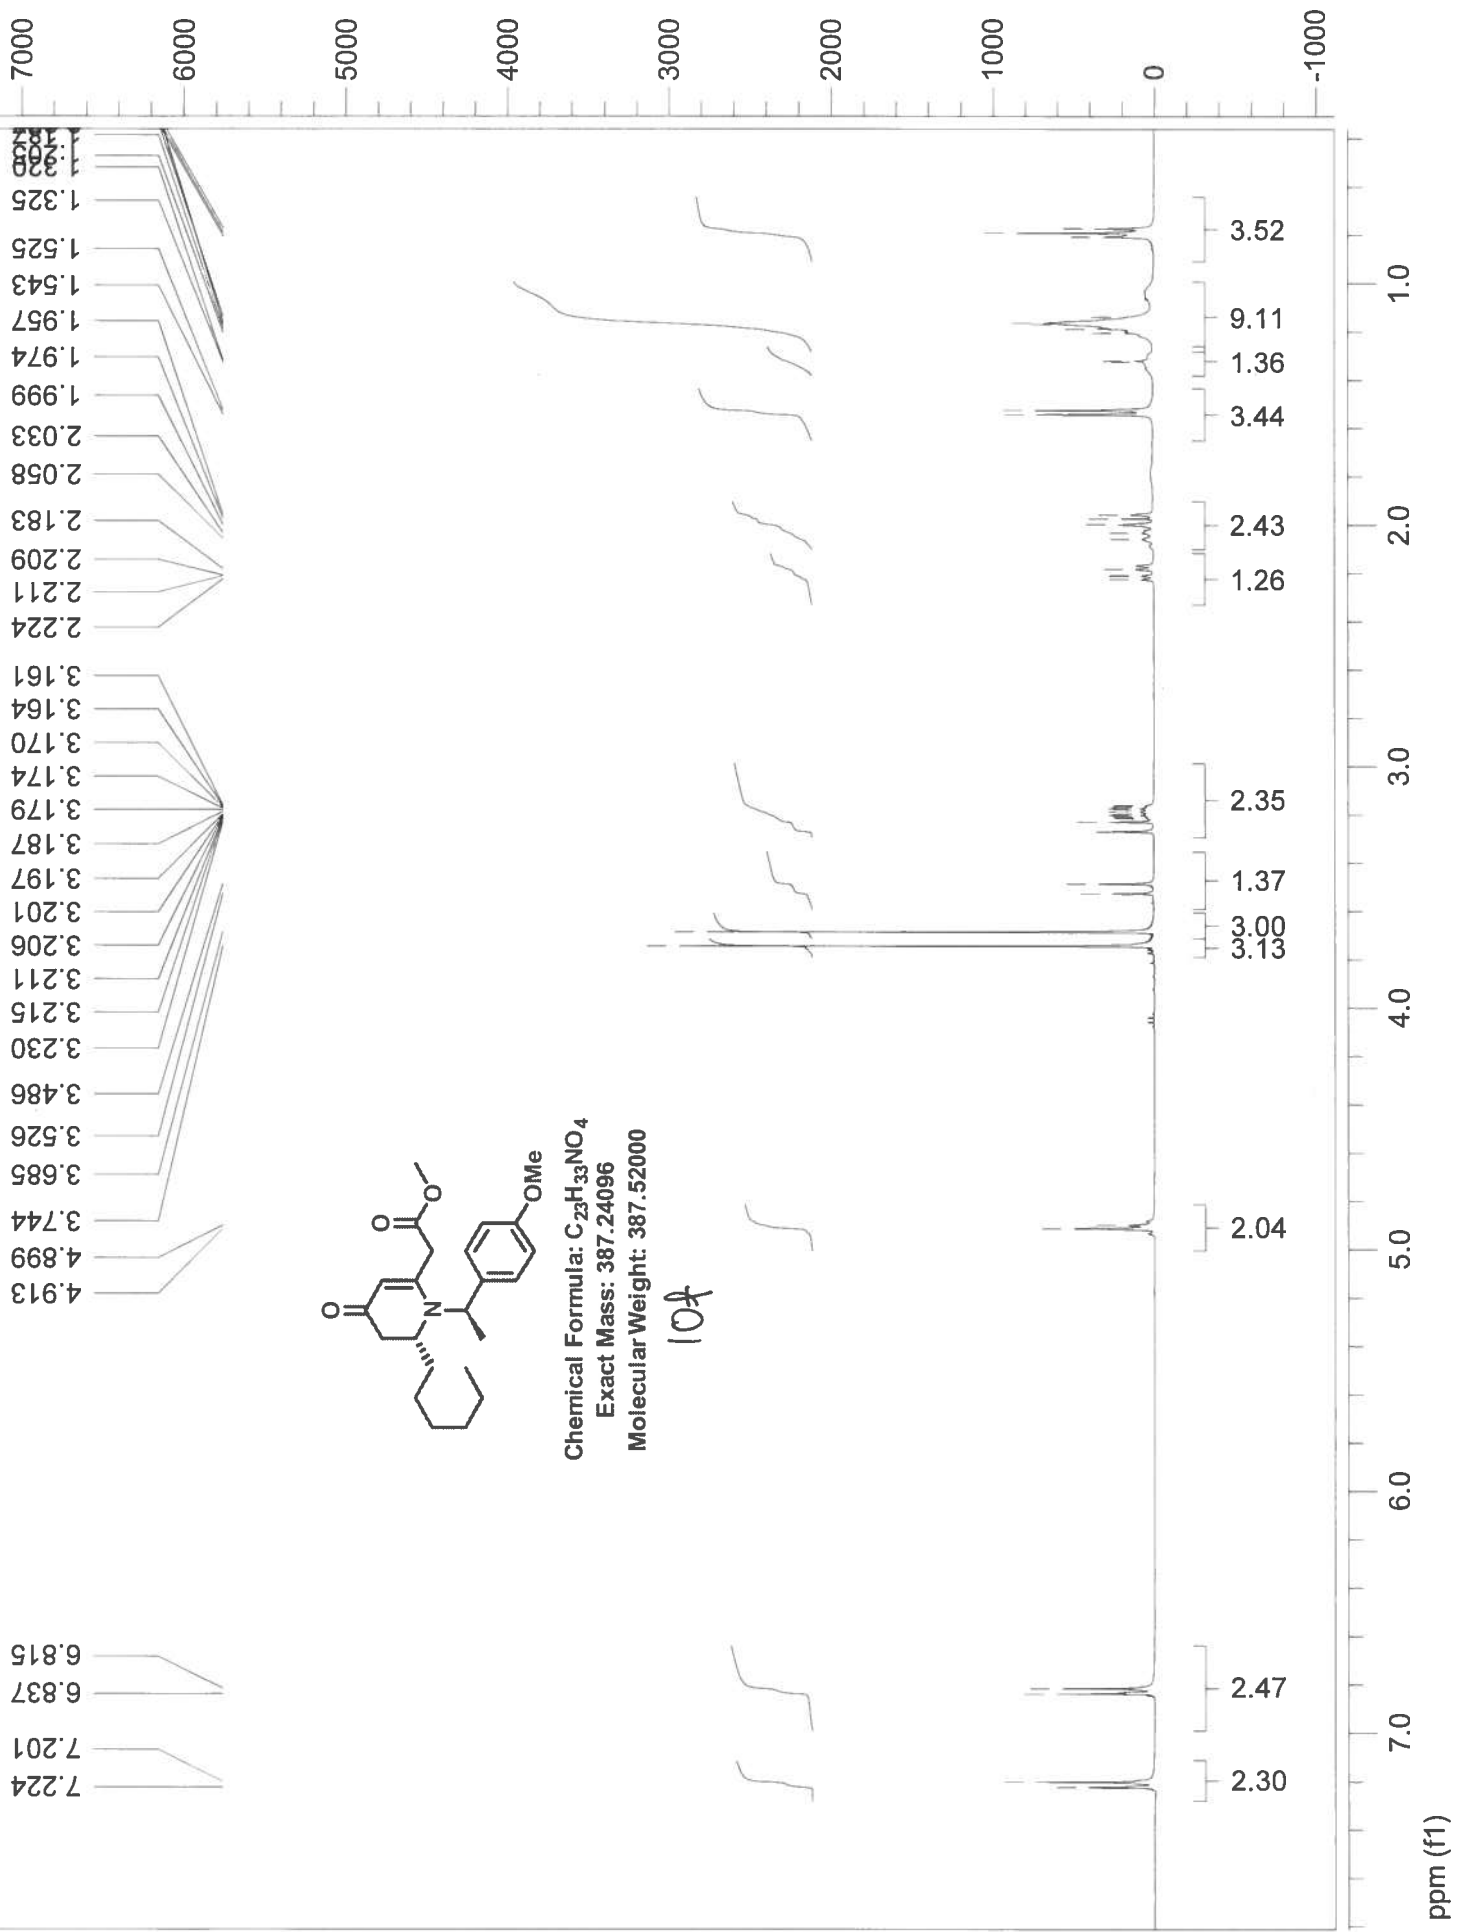

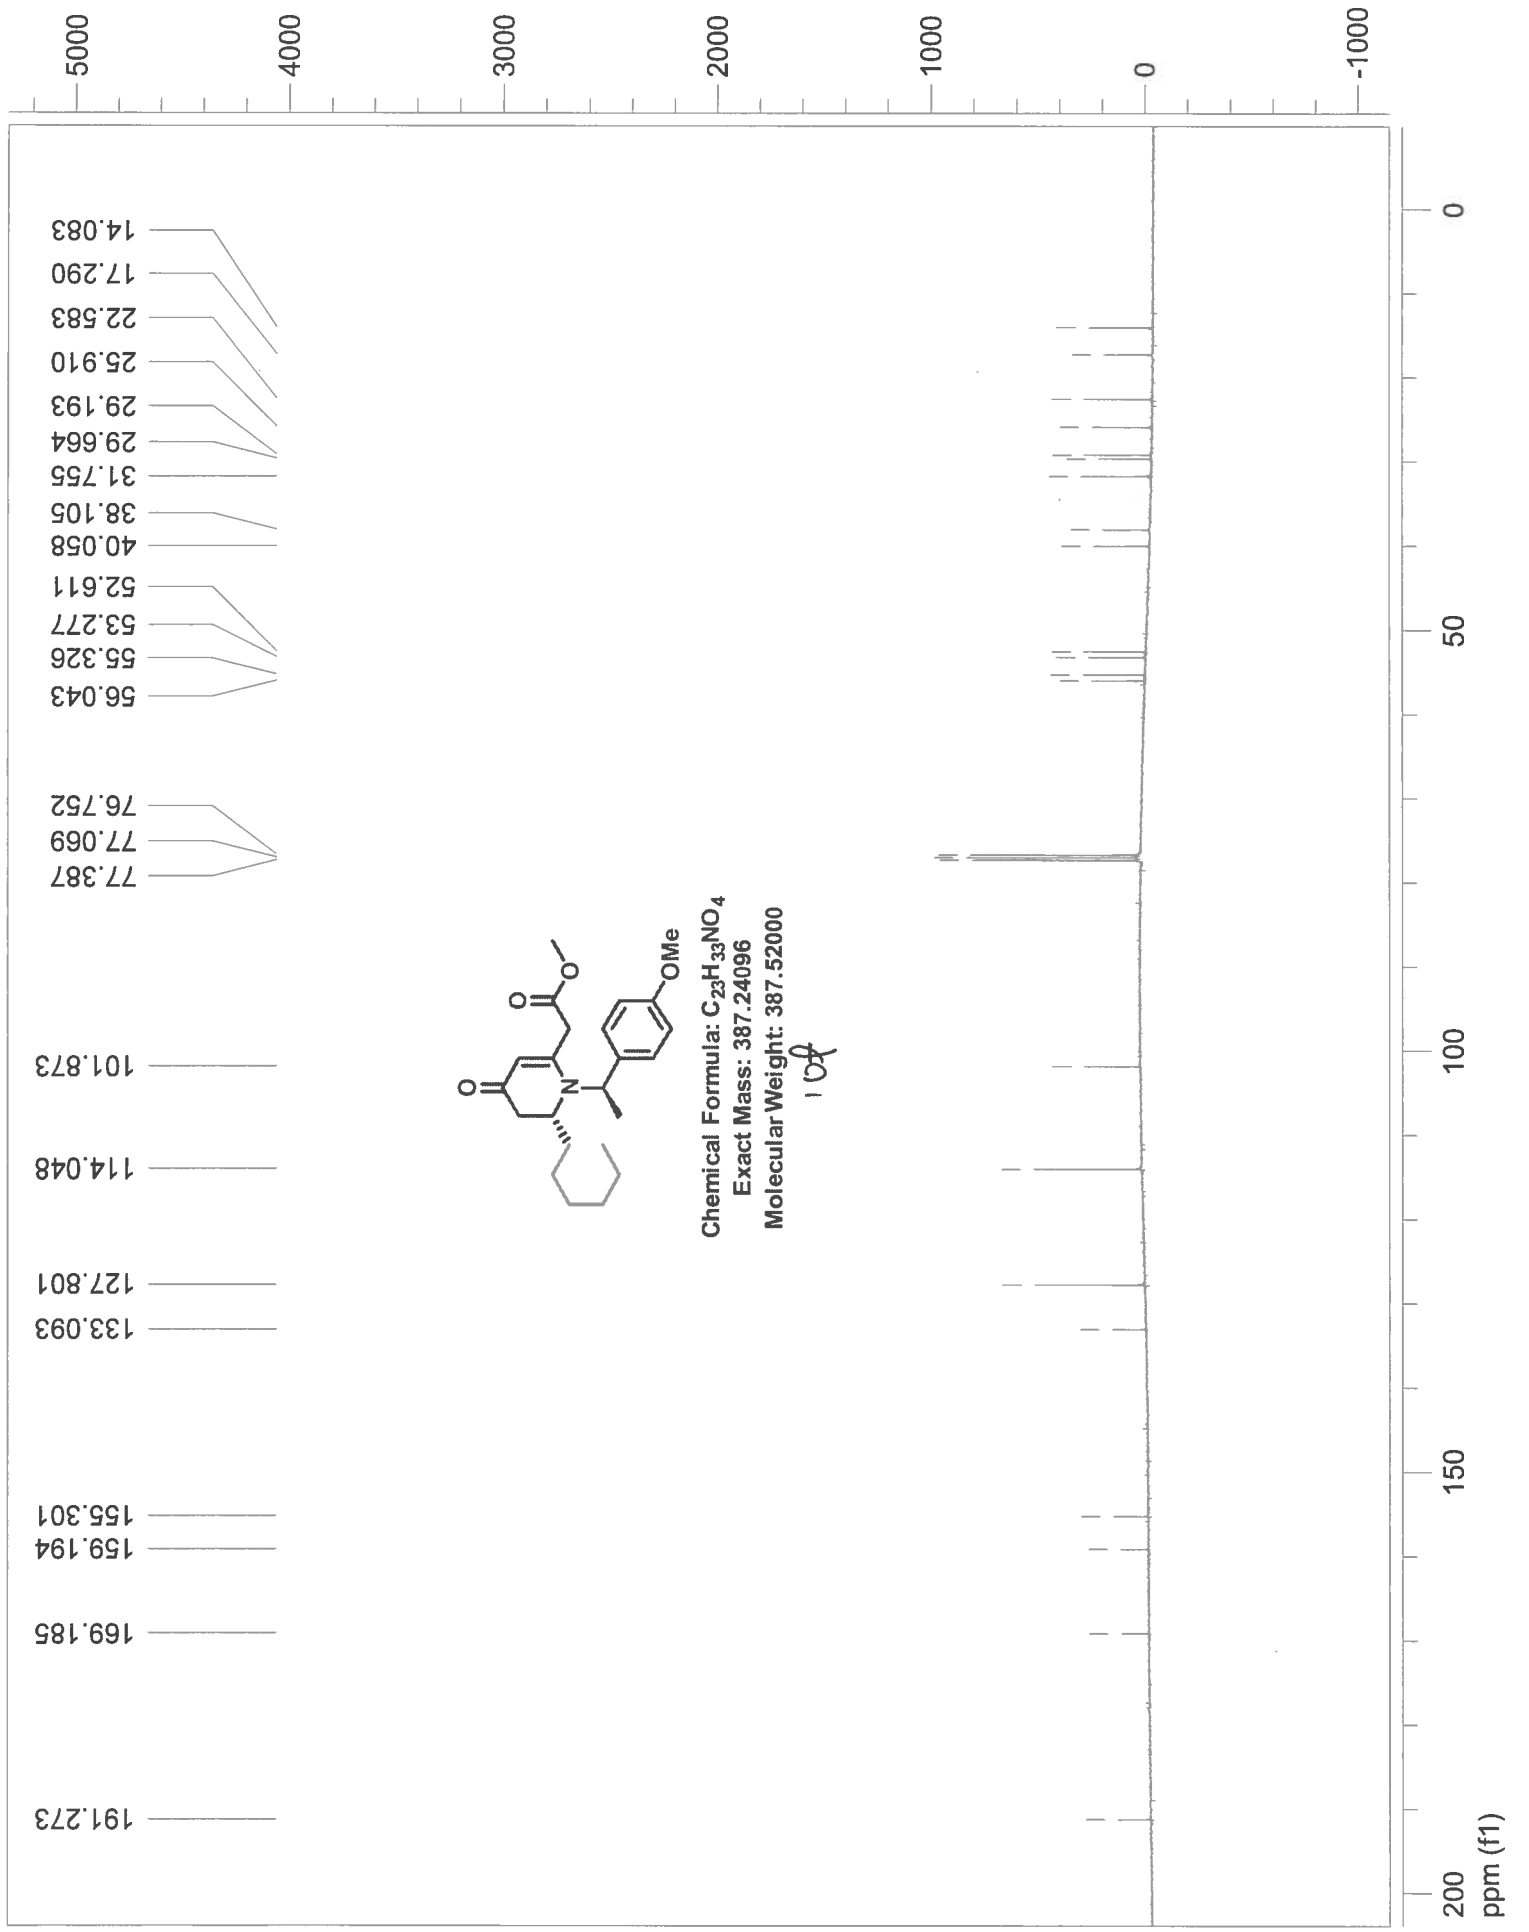

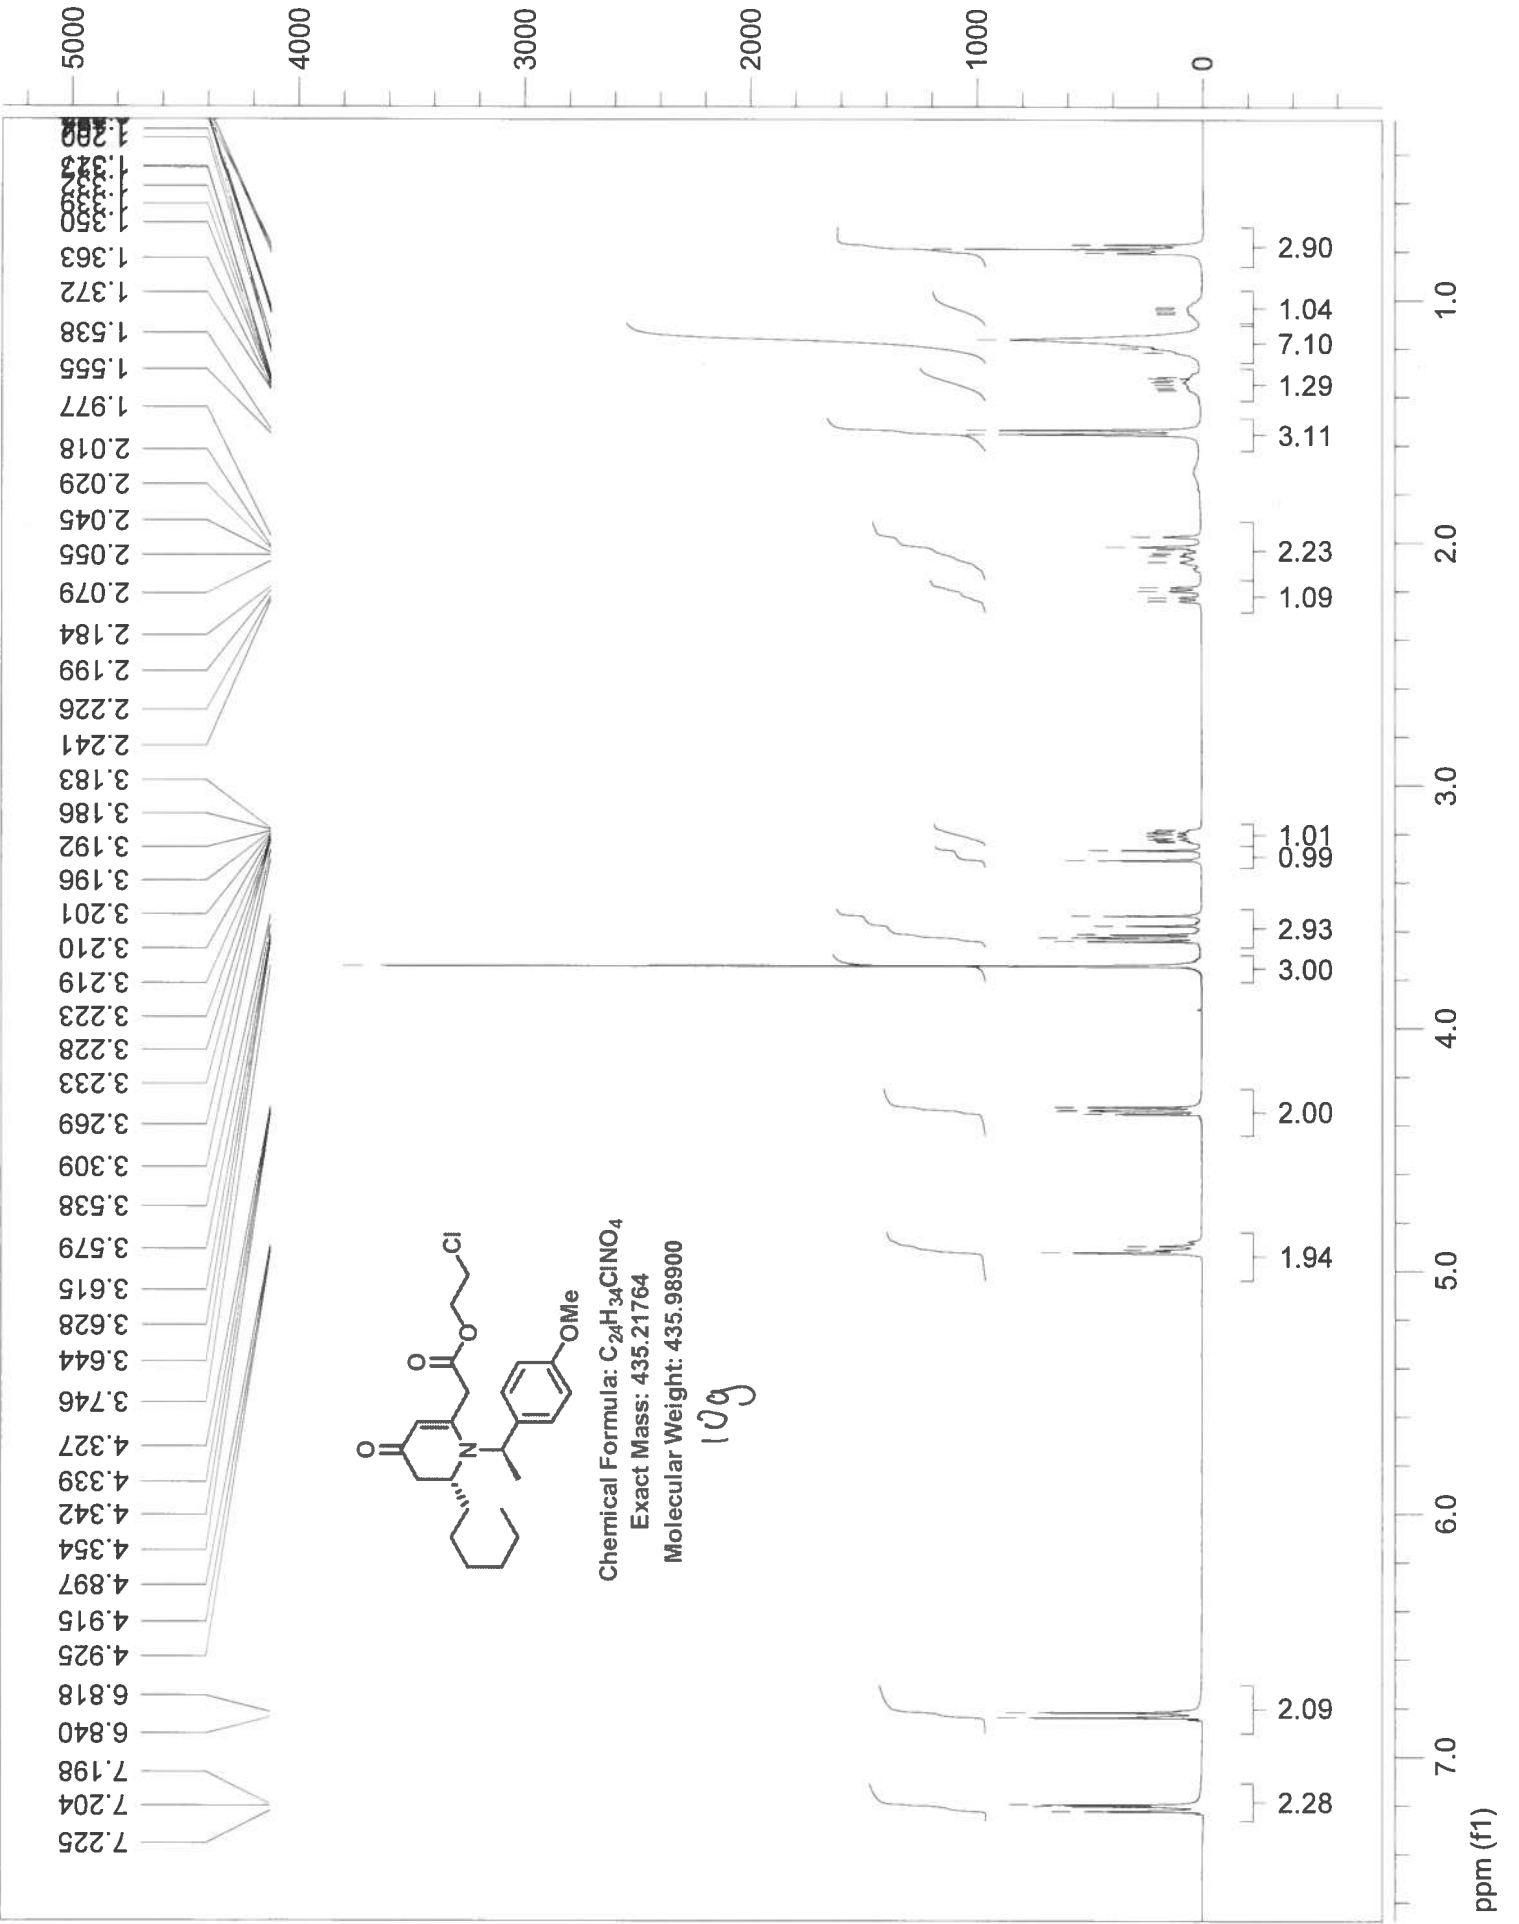

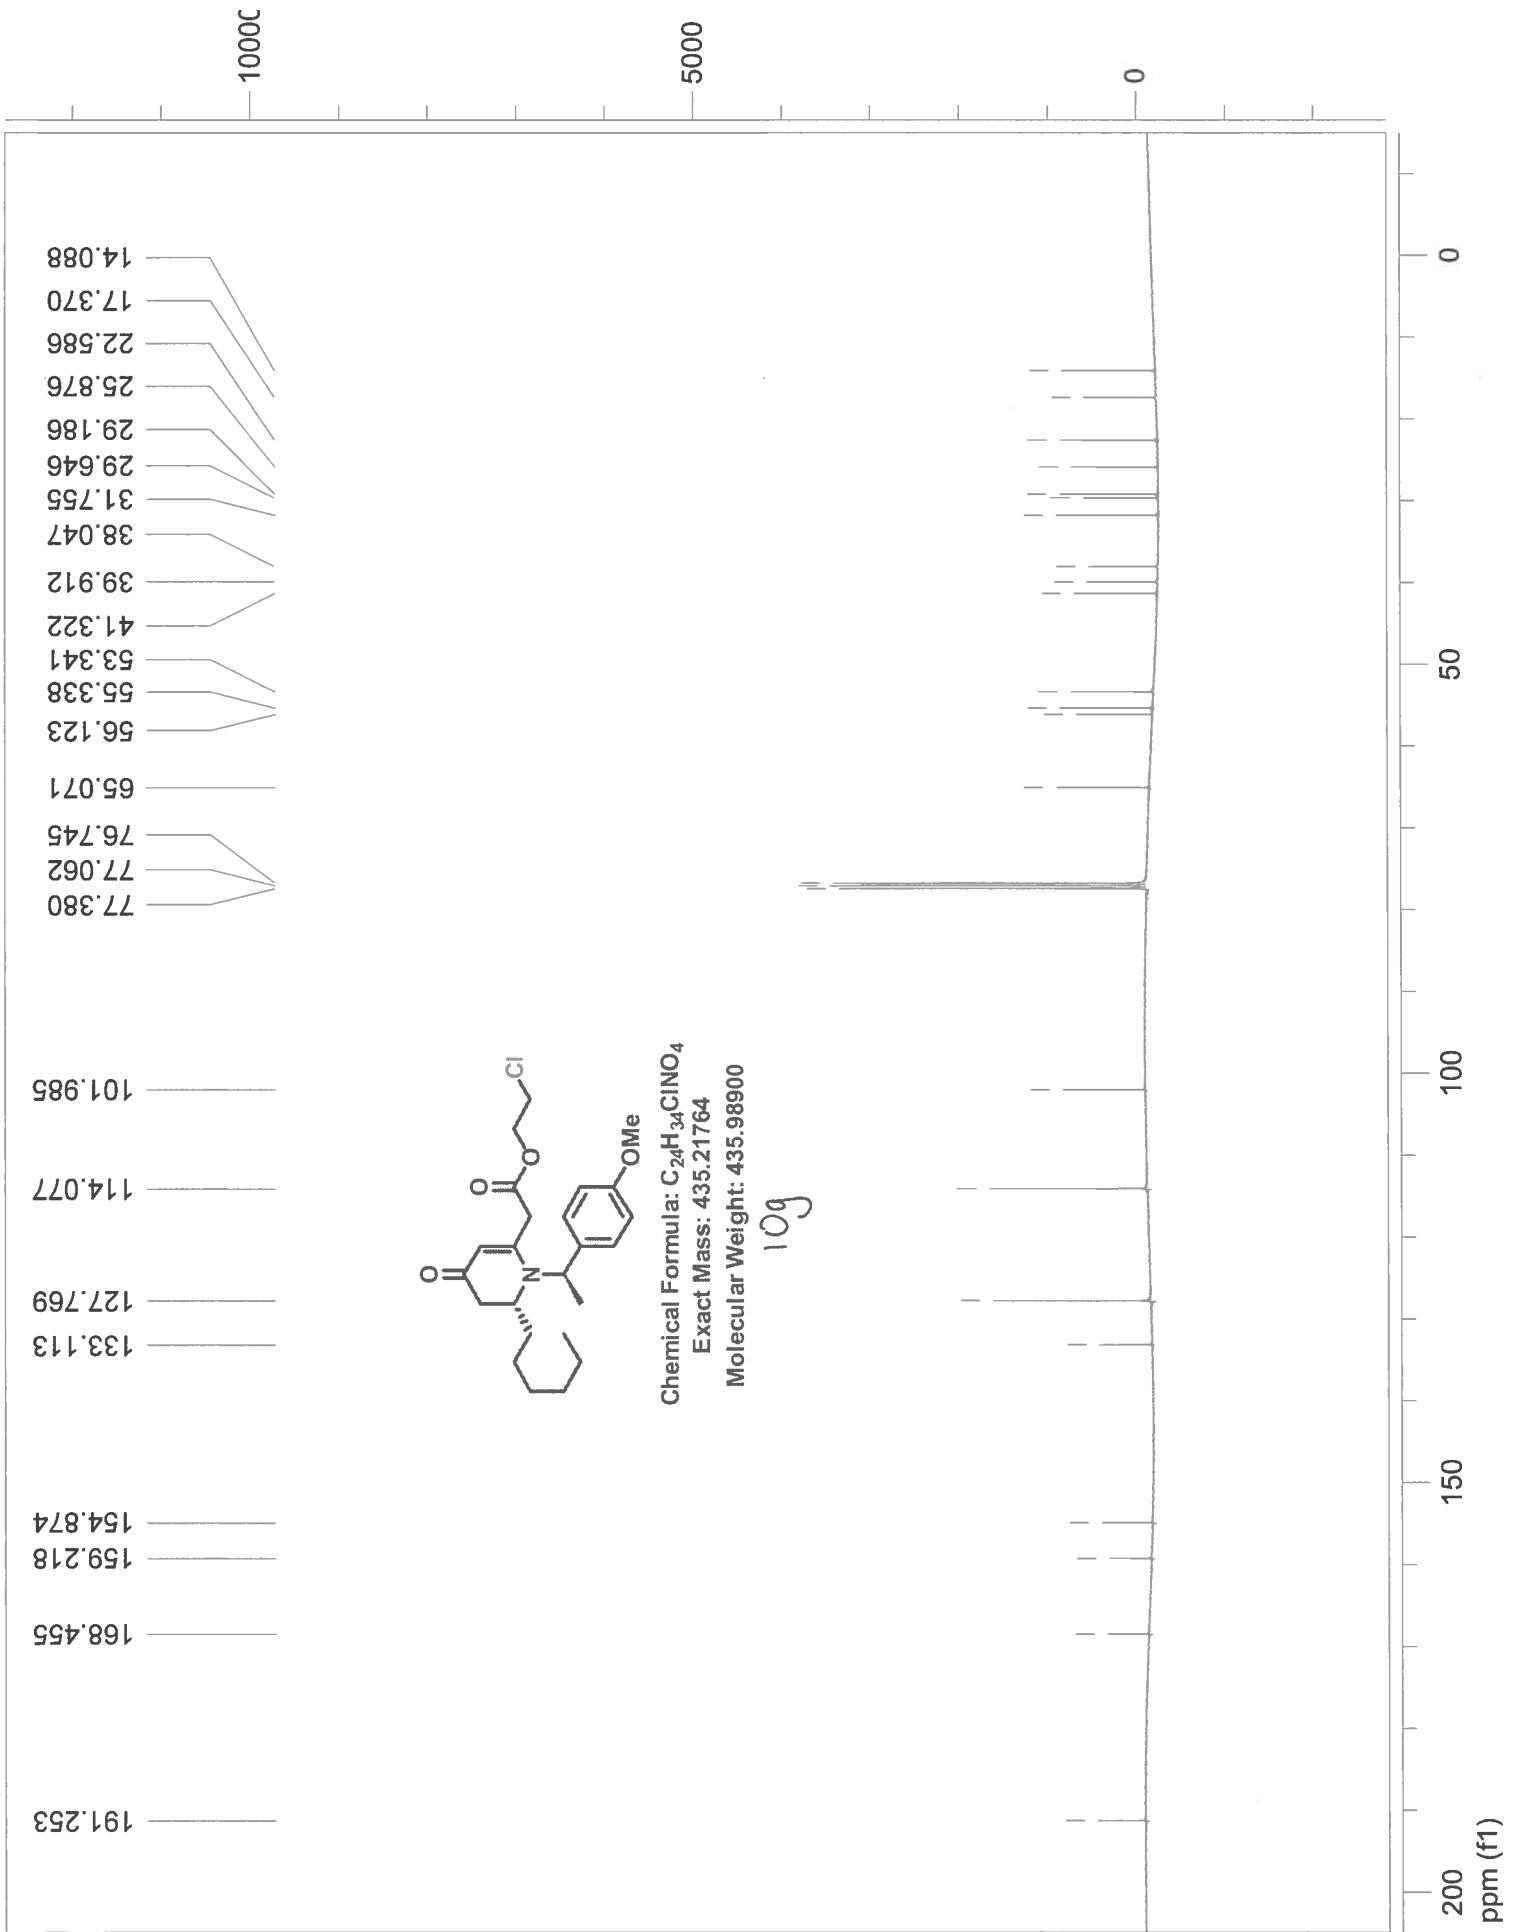

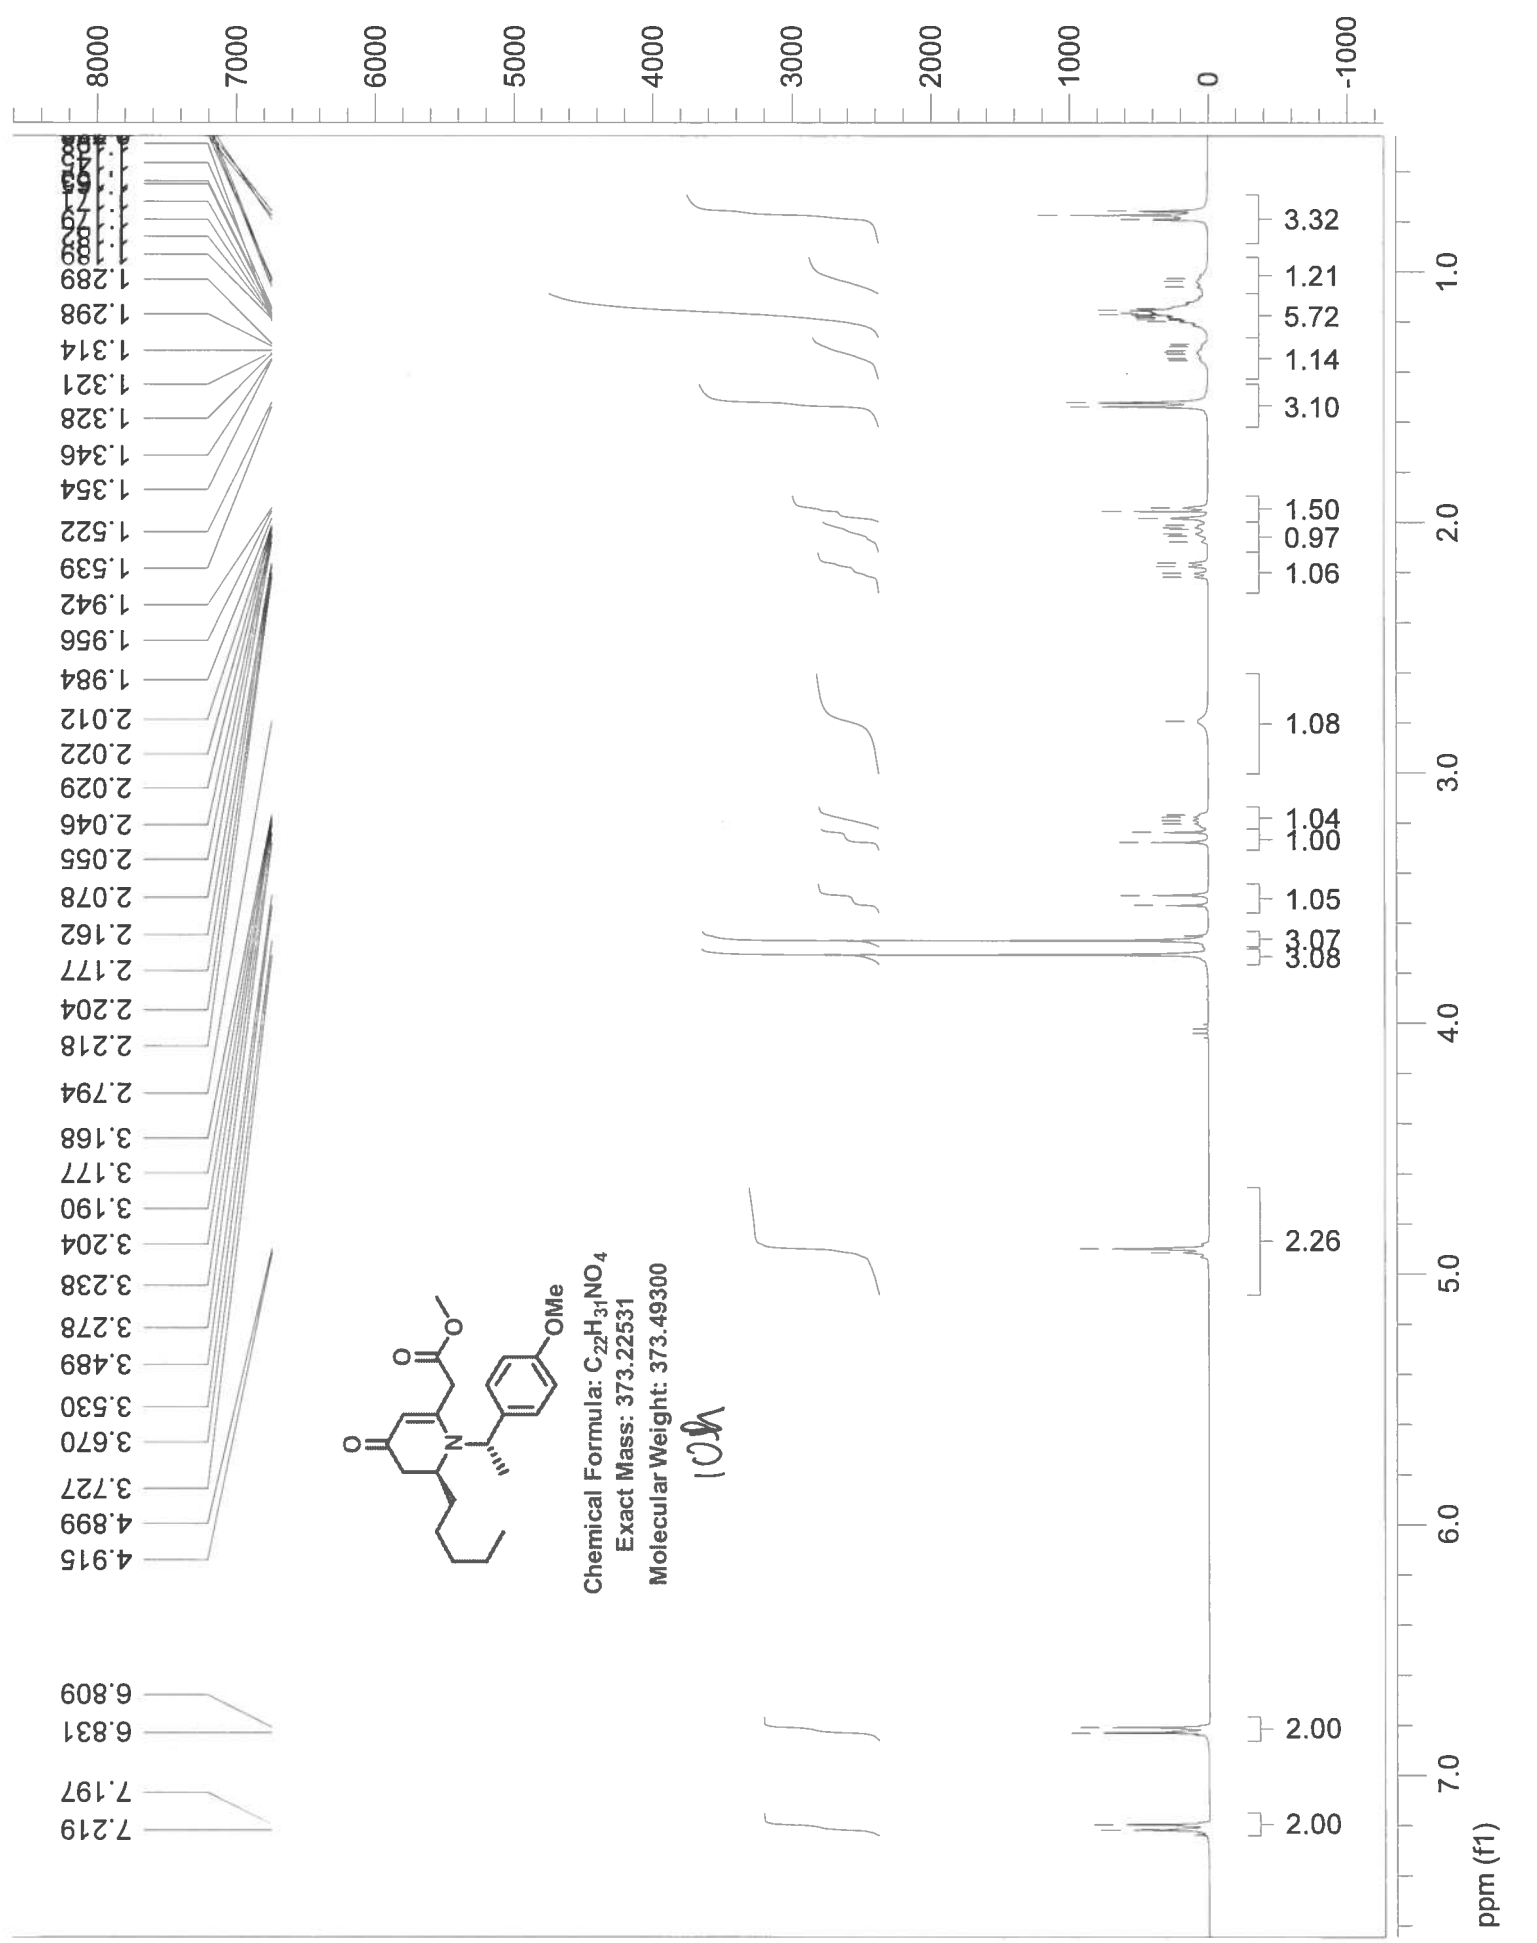



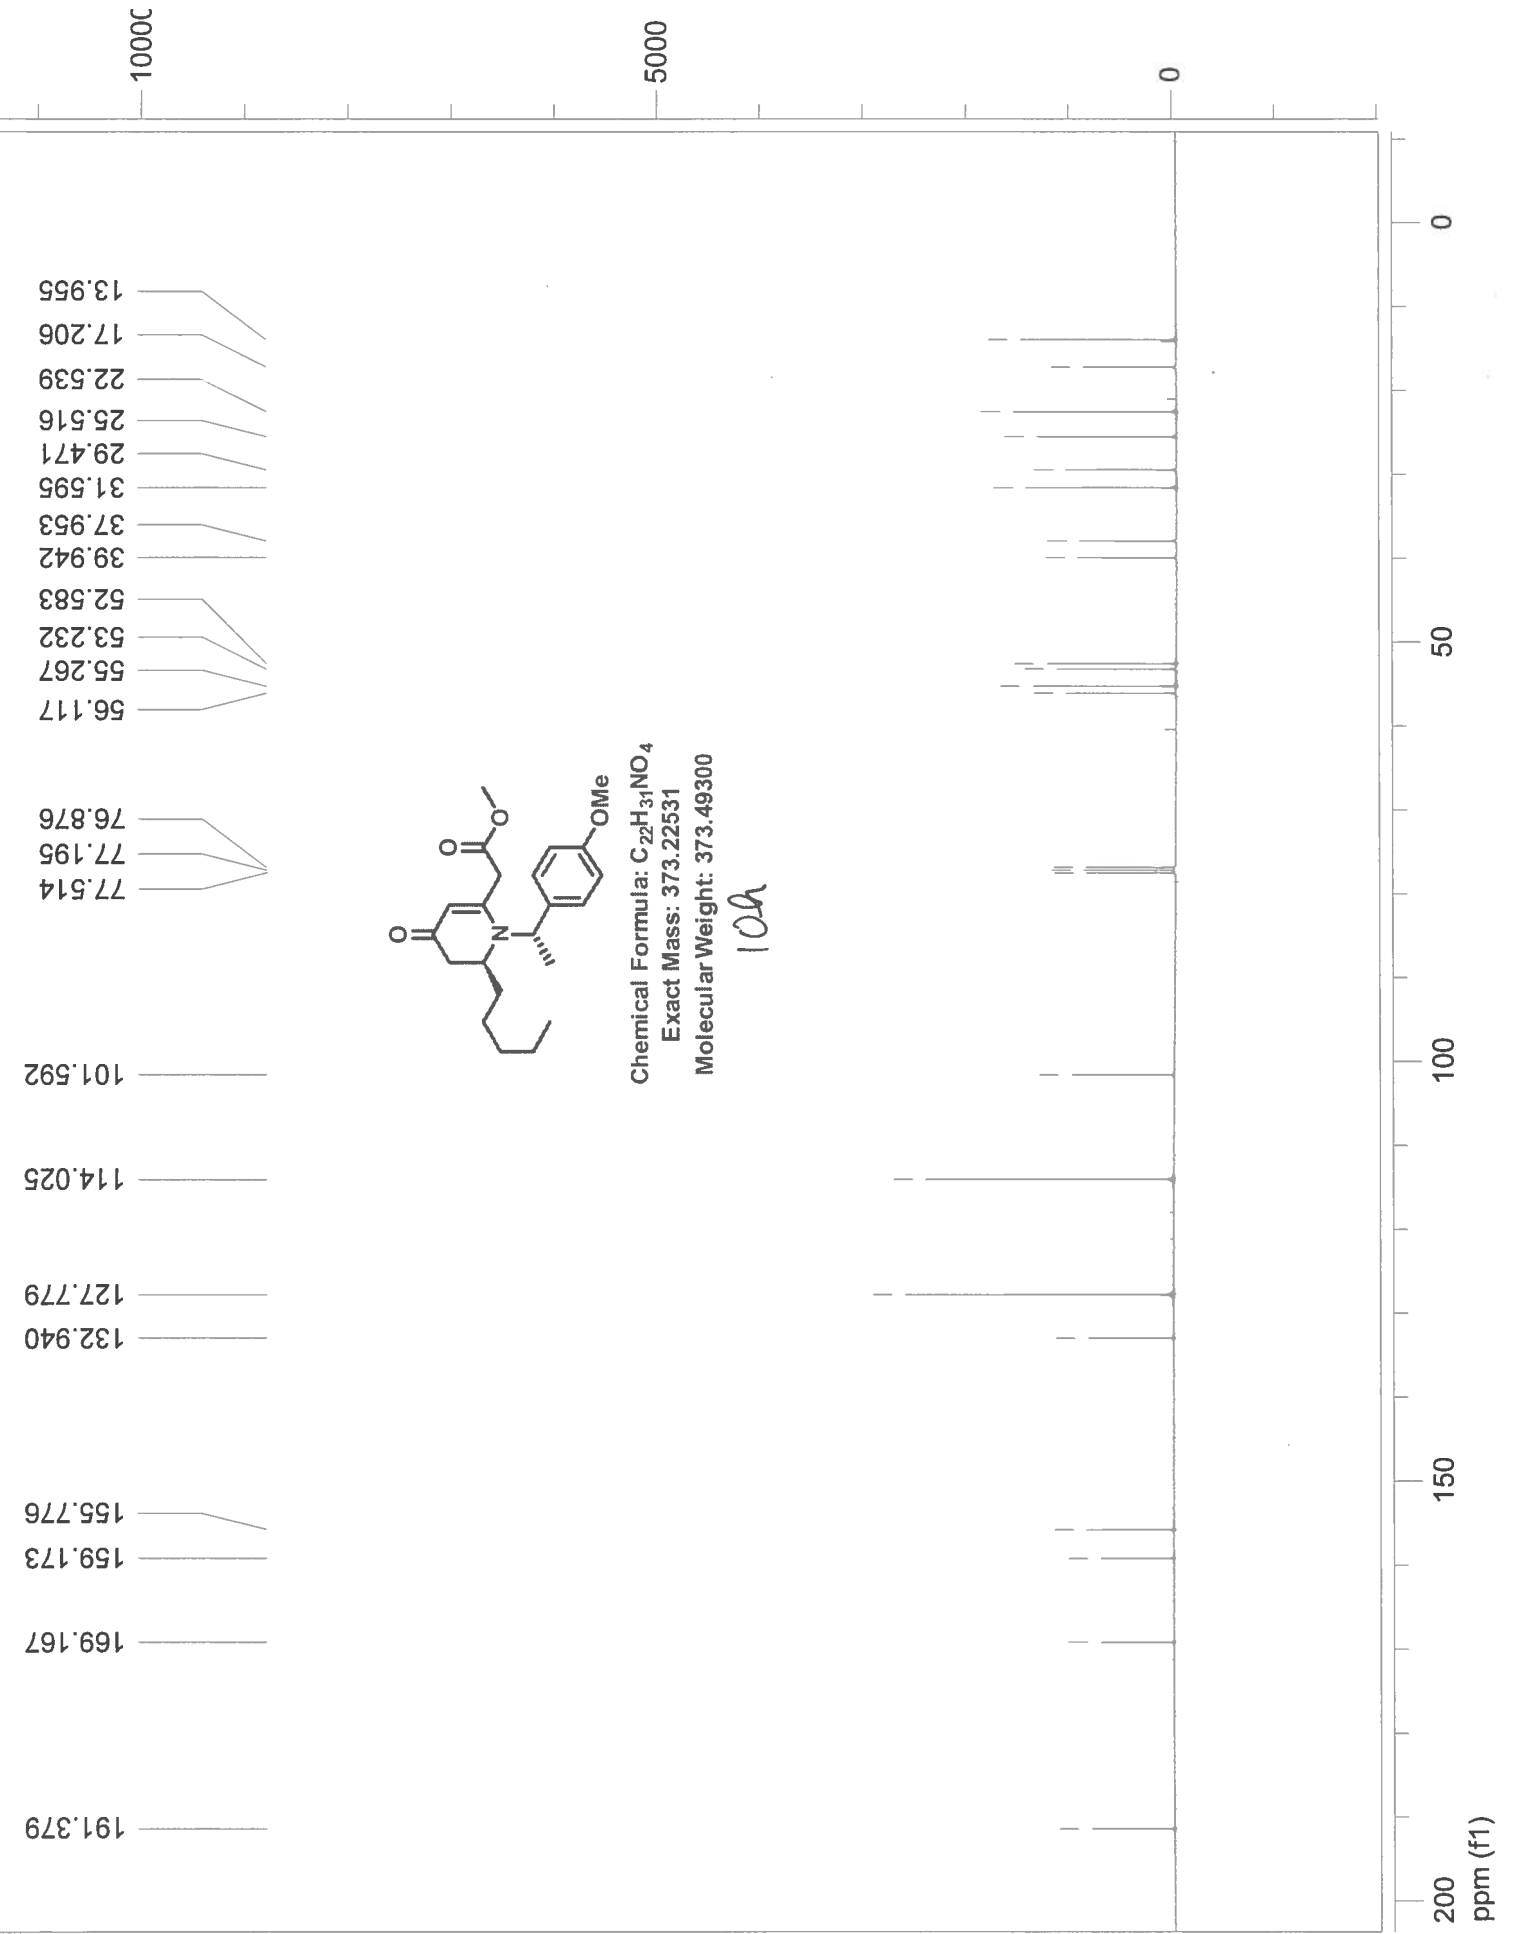

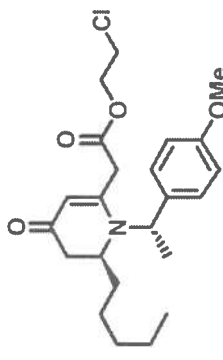

Chemical Formula:  $C_{23}H_{32}ClNO_4$   
 Exact Mass: 421.20199  
 Molecular Weight: 421.96200

10i

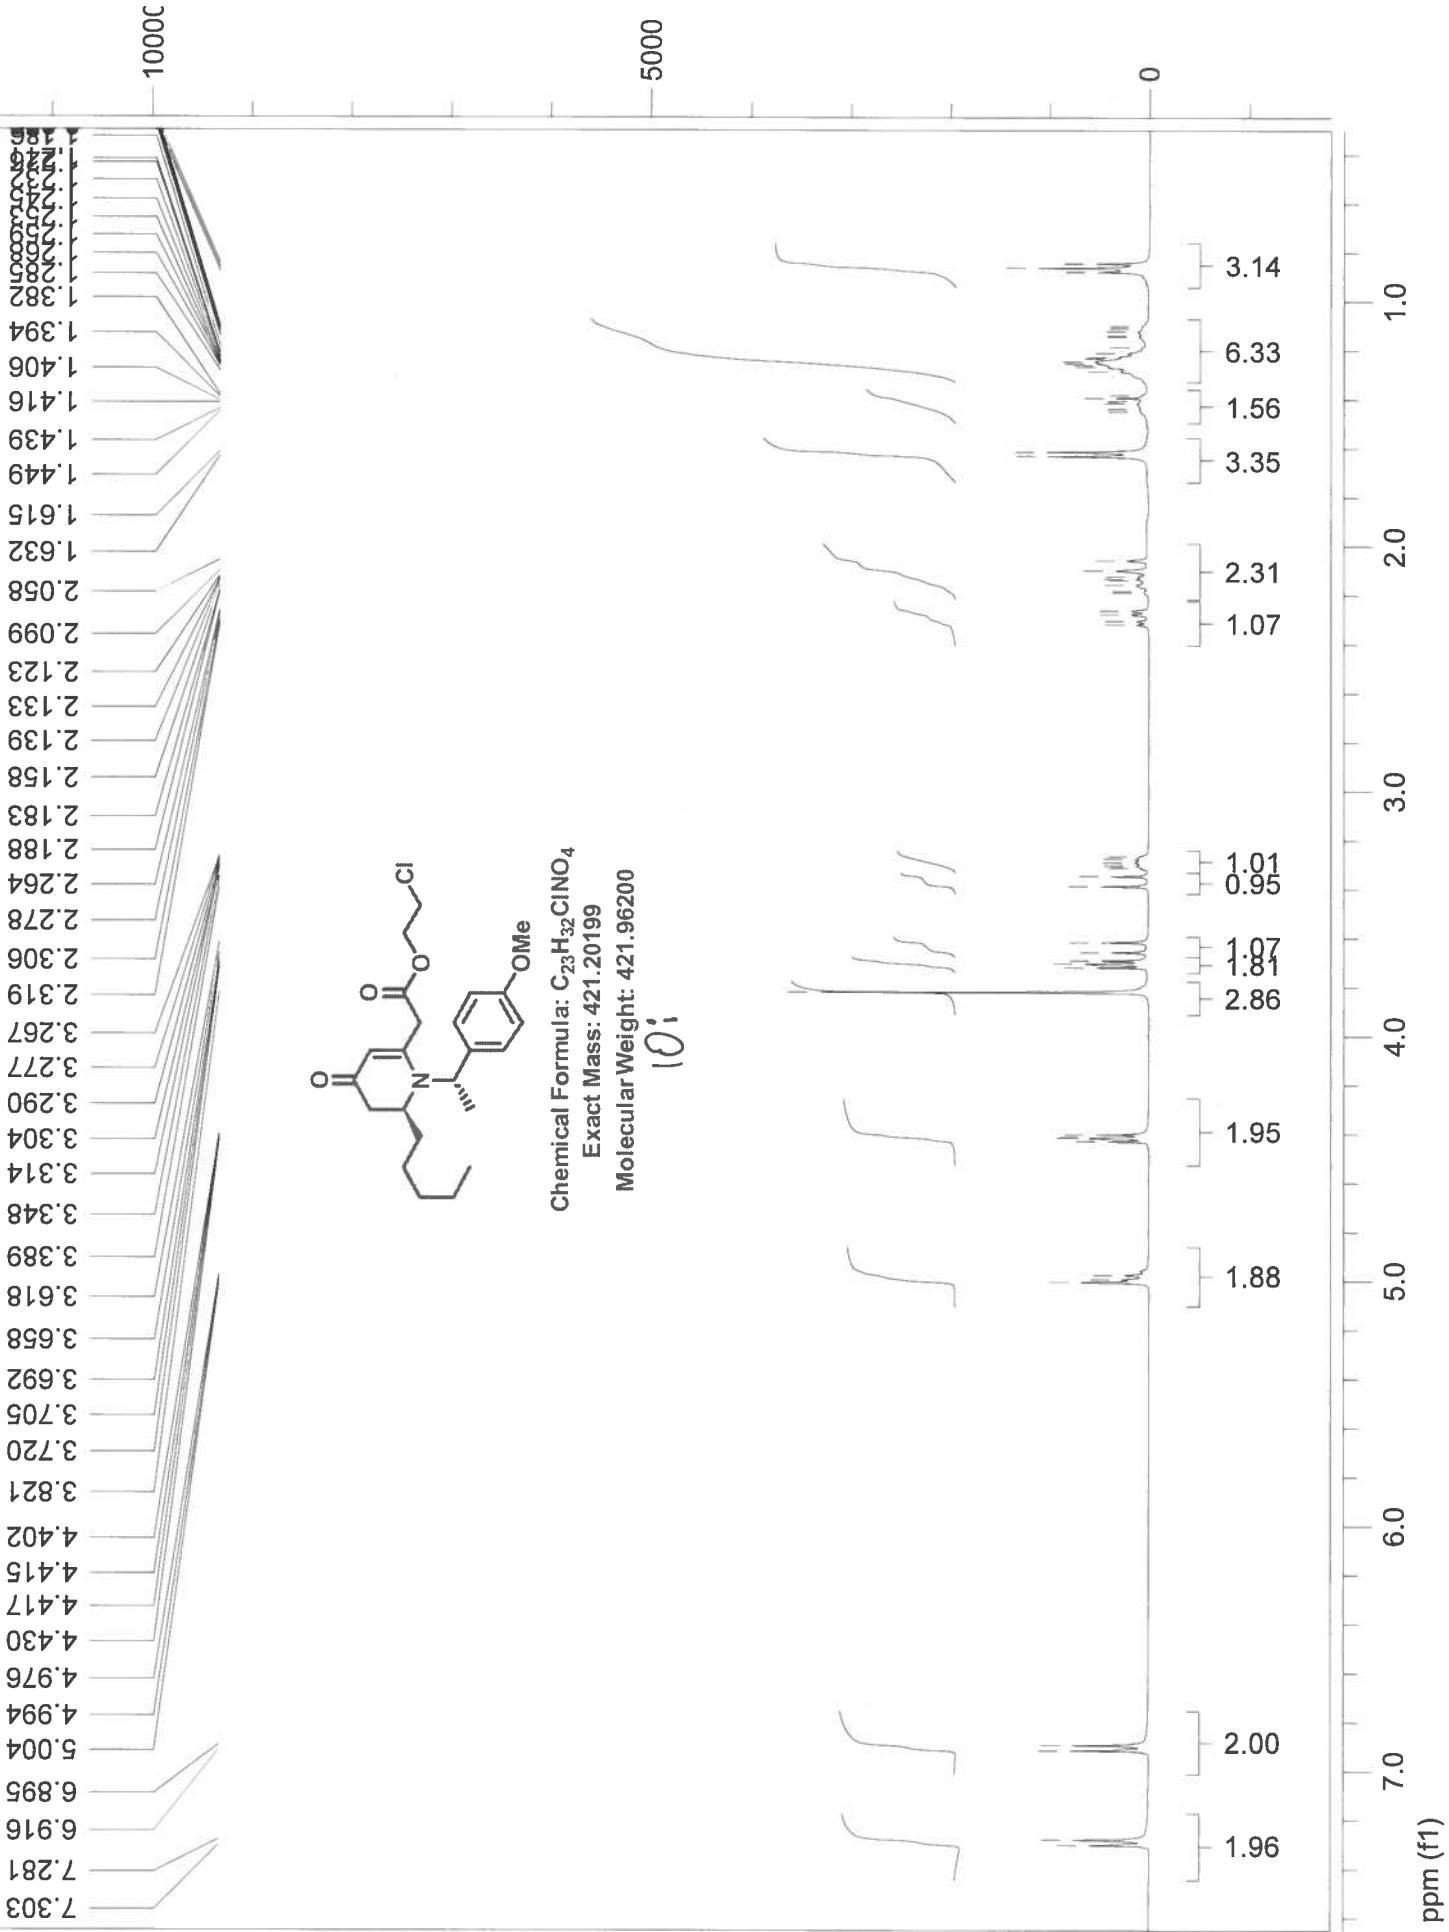

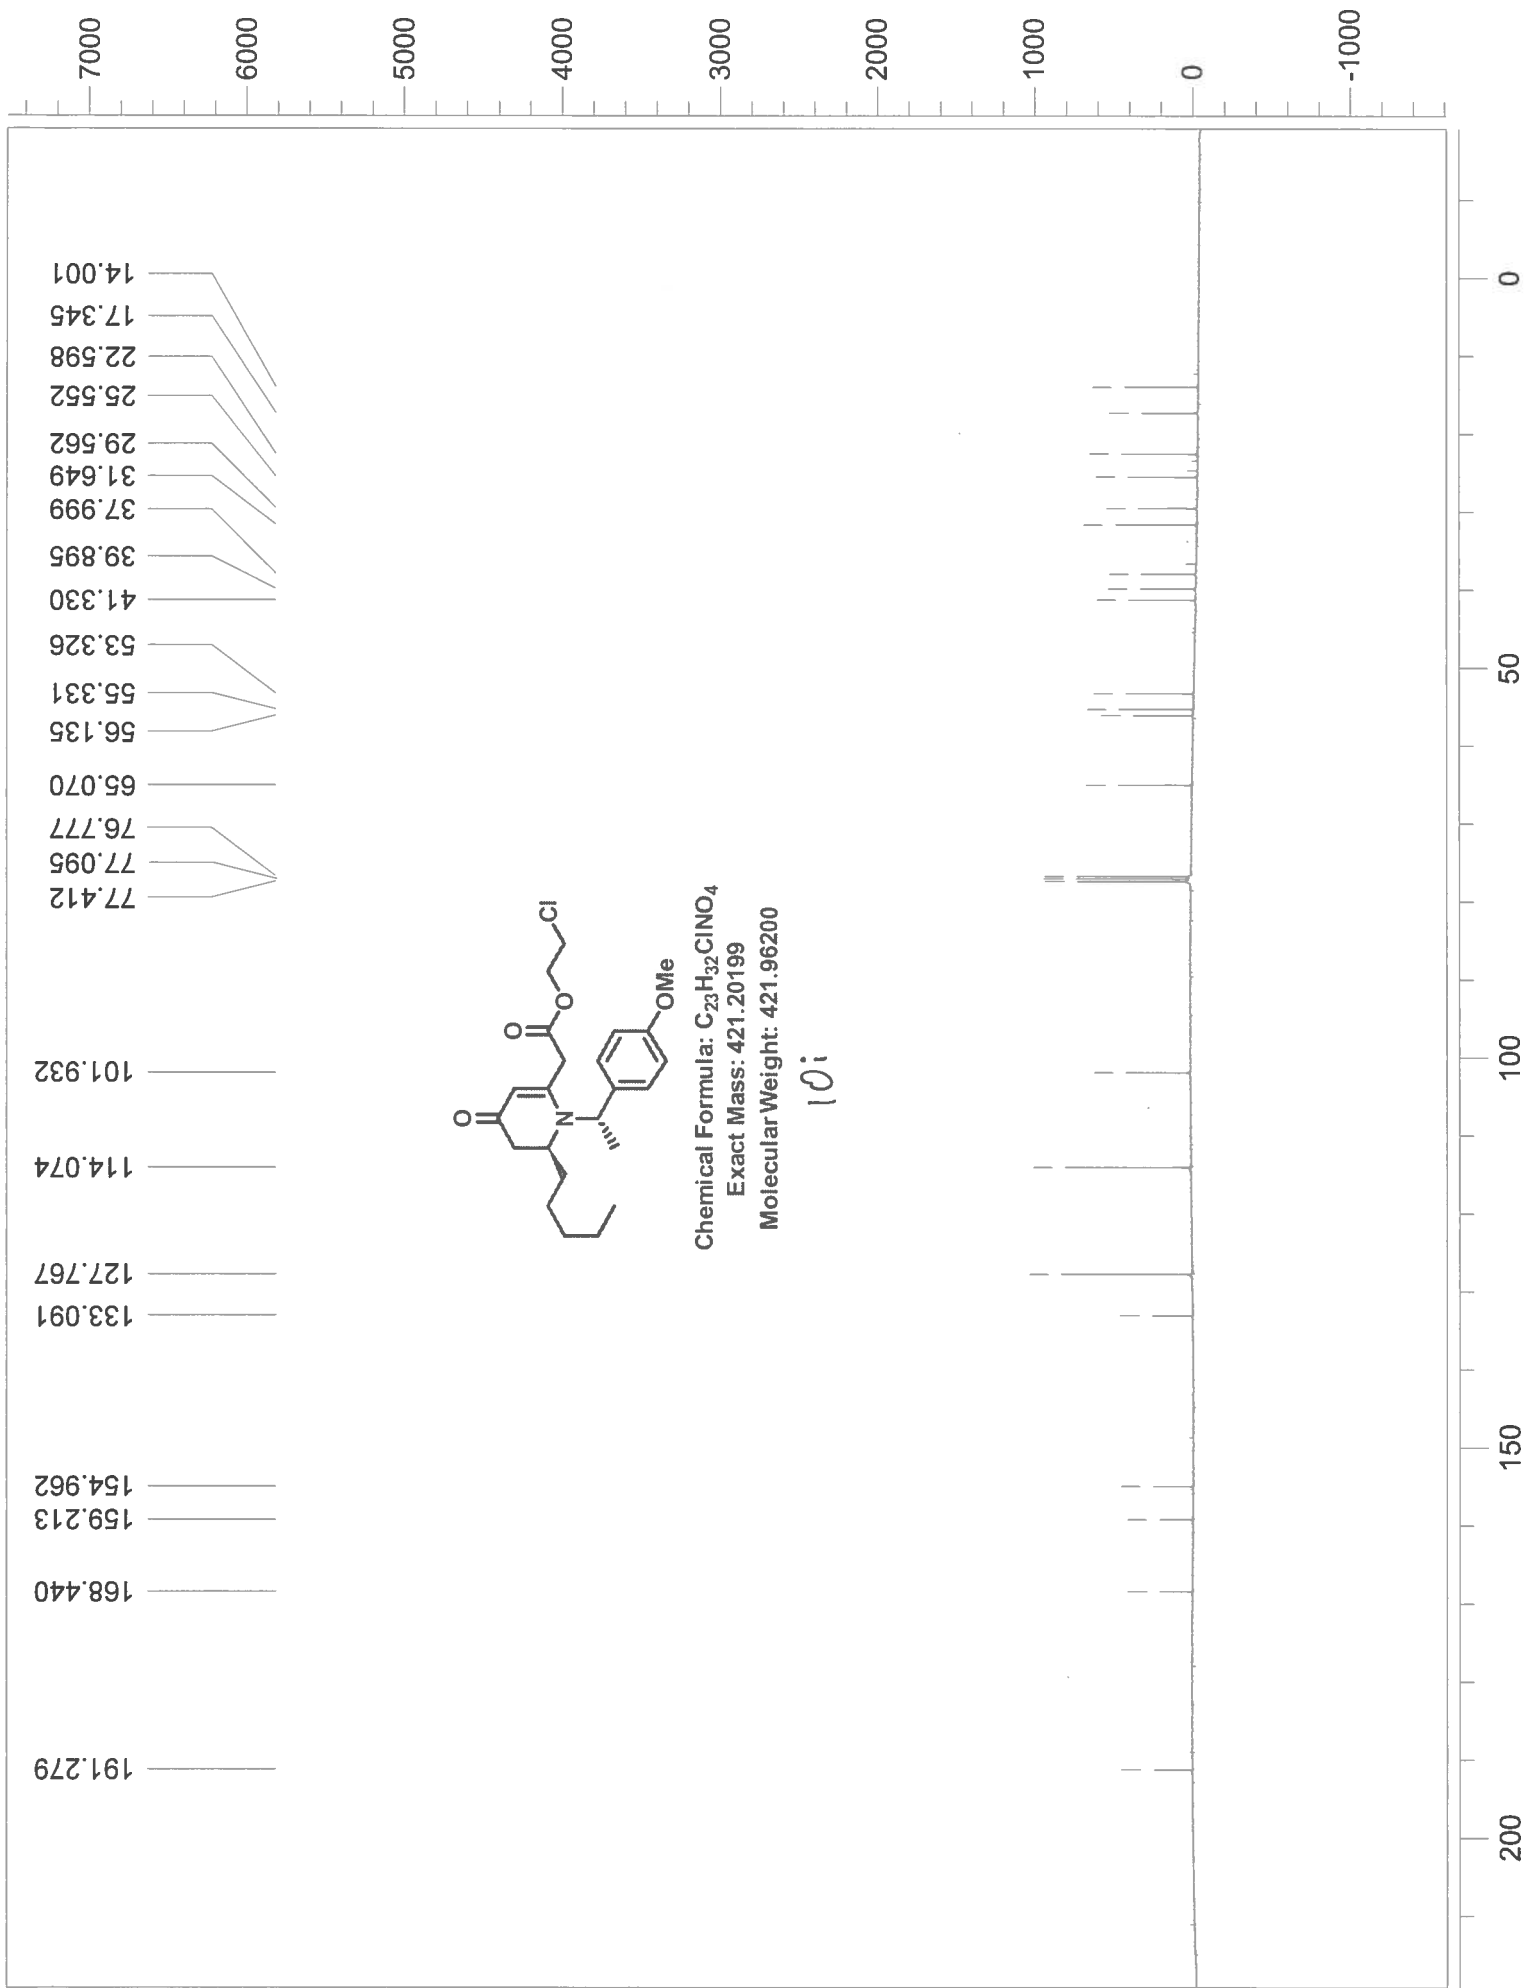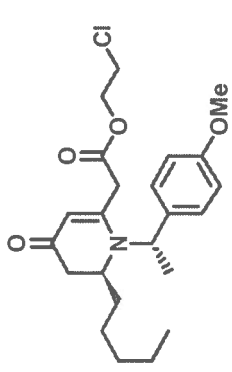

Chemical Formula: C<sub>23</sub>H<sub>32</sub>ClNO<sub>4</sub>  
 Exact Mass: 421.20199  
 Molecular Weight: 421.96200

10i

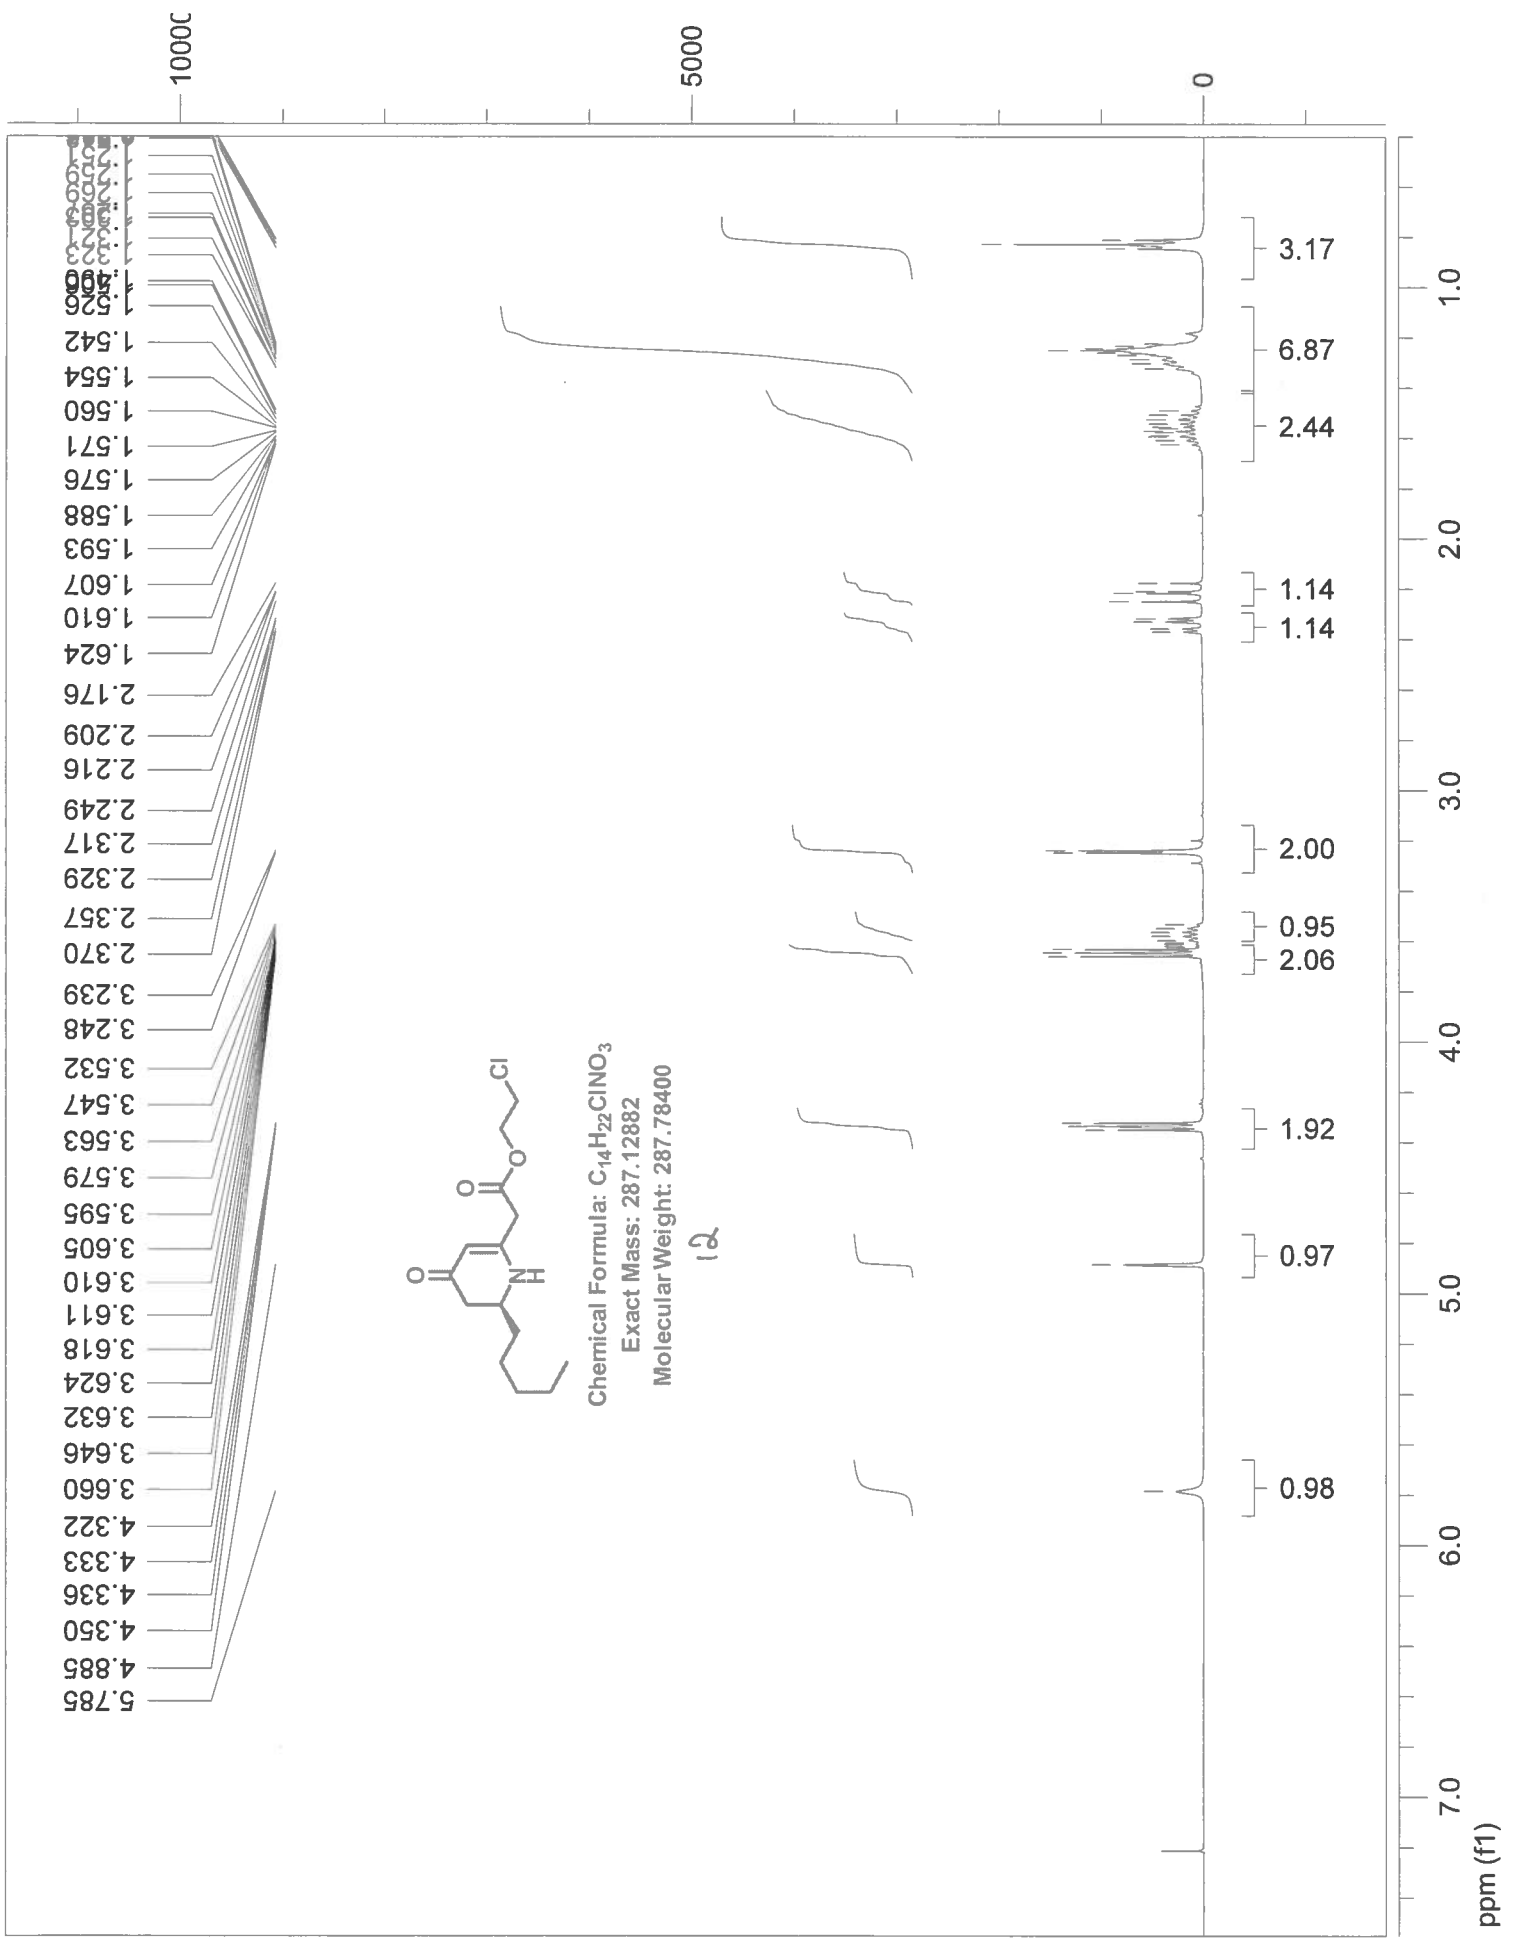

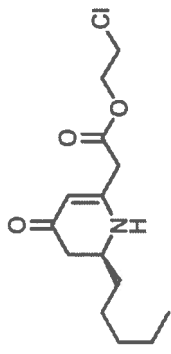

Chemical Formula:  $C_{14}H_{22}ClNO_3$

Exact Mass: 287.12882

Molecular Weight: 287.78400

12

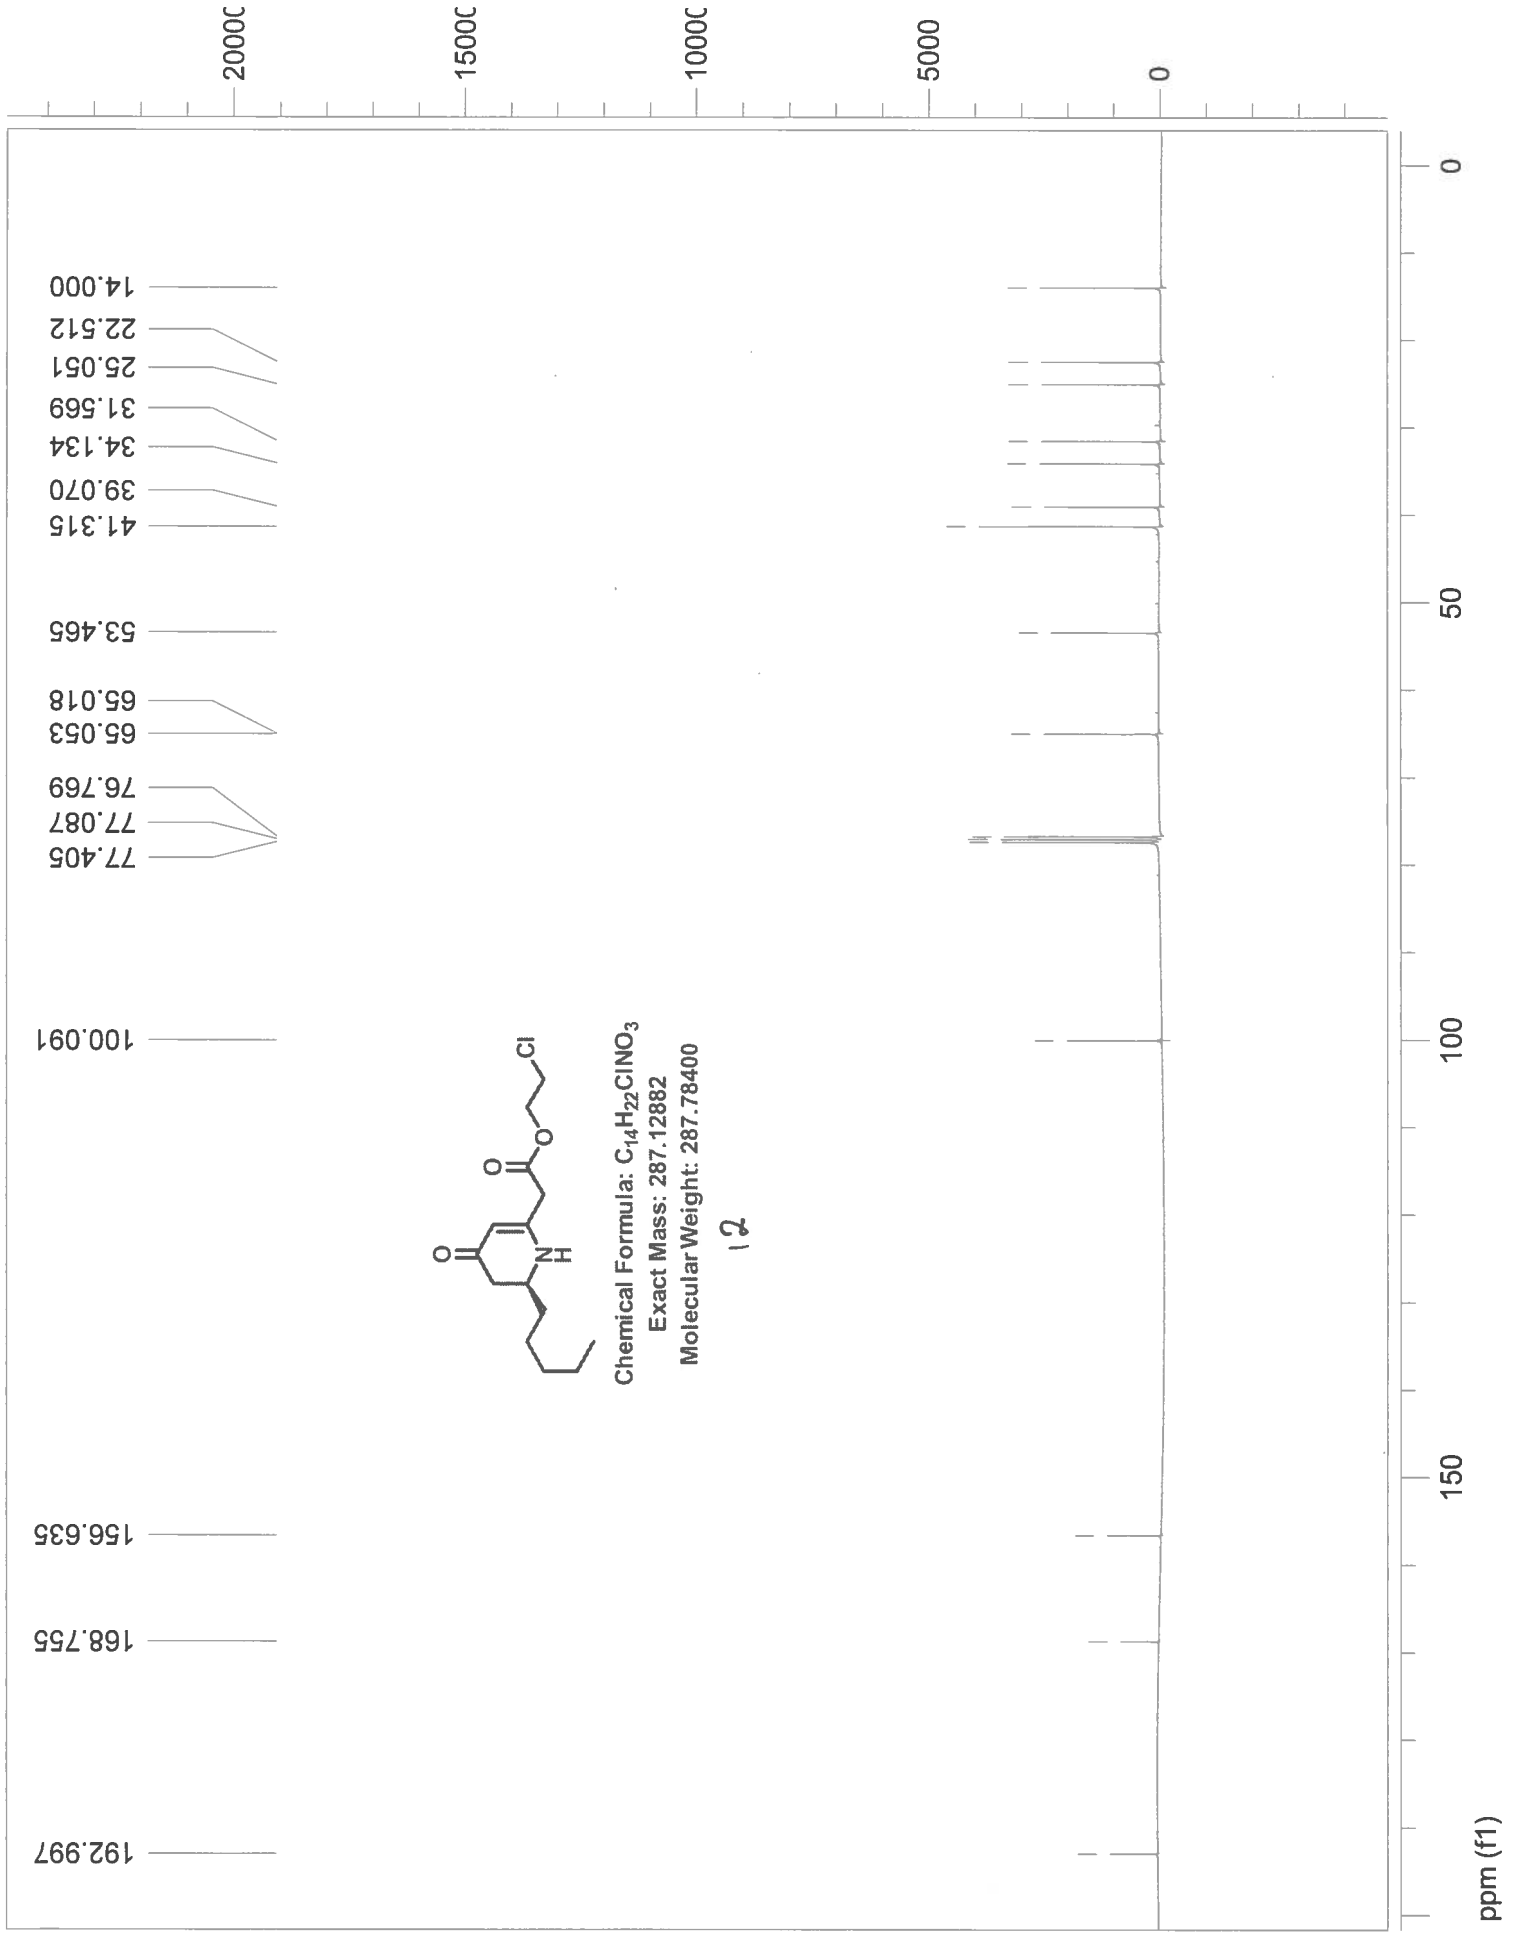

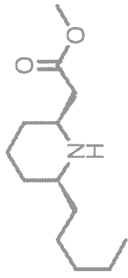

Chemical Formula: C<sub>13</sub>H<sub>25</sub>NO<sub>2</sub>  
 Exact Mass: 227.18853  
 Molecular Weight: 227.34800

13

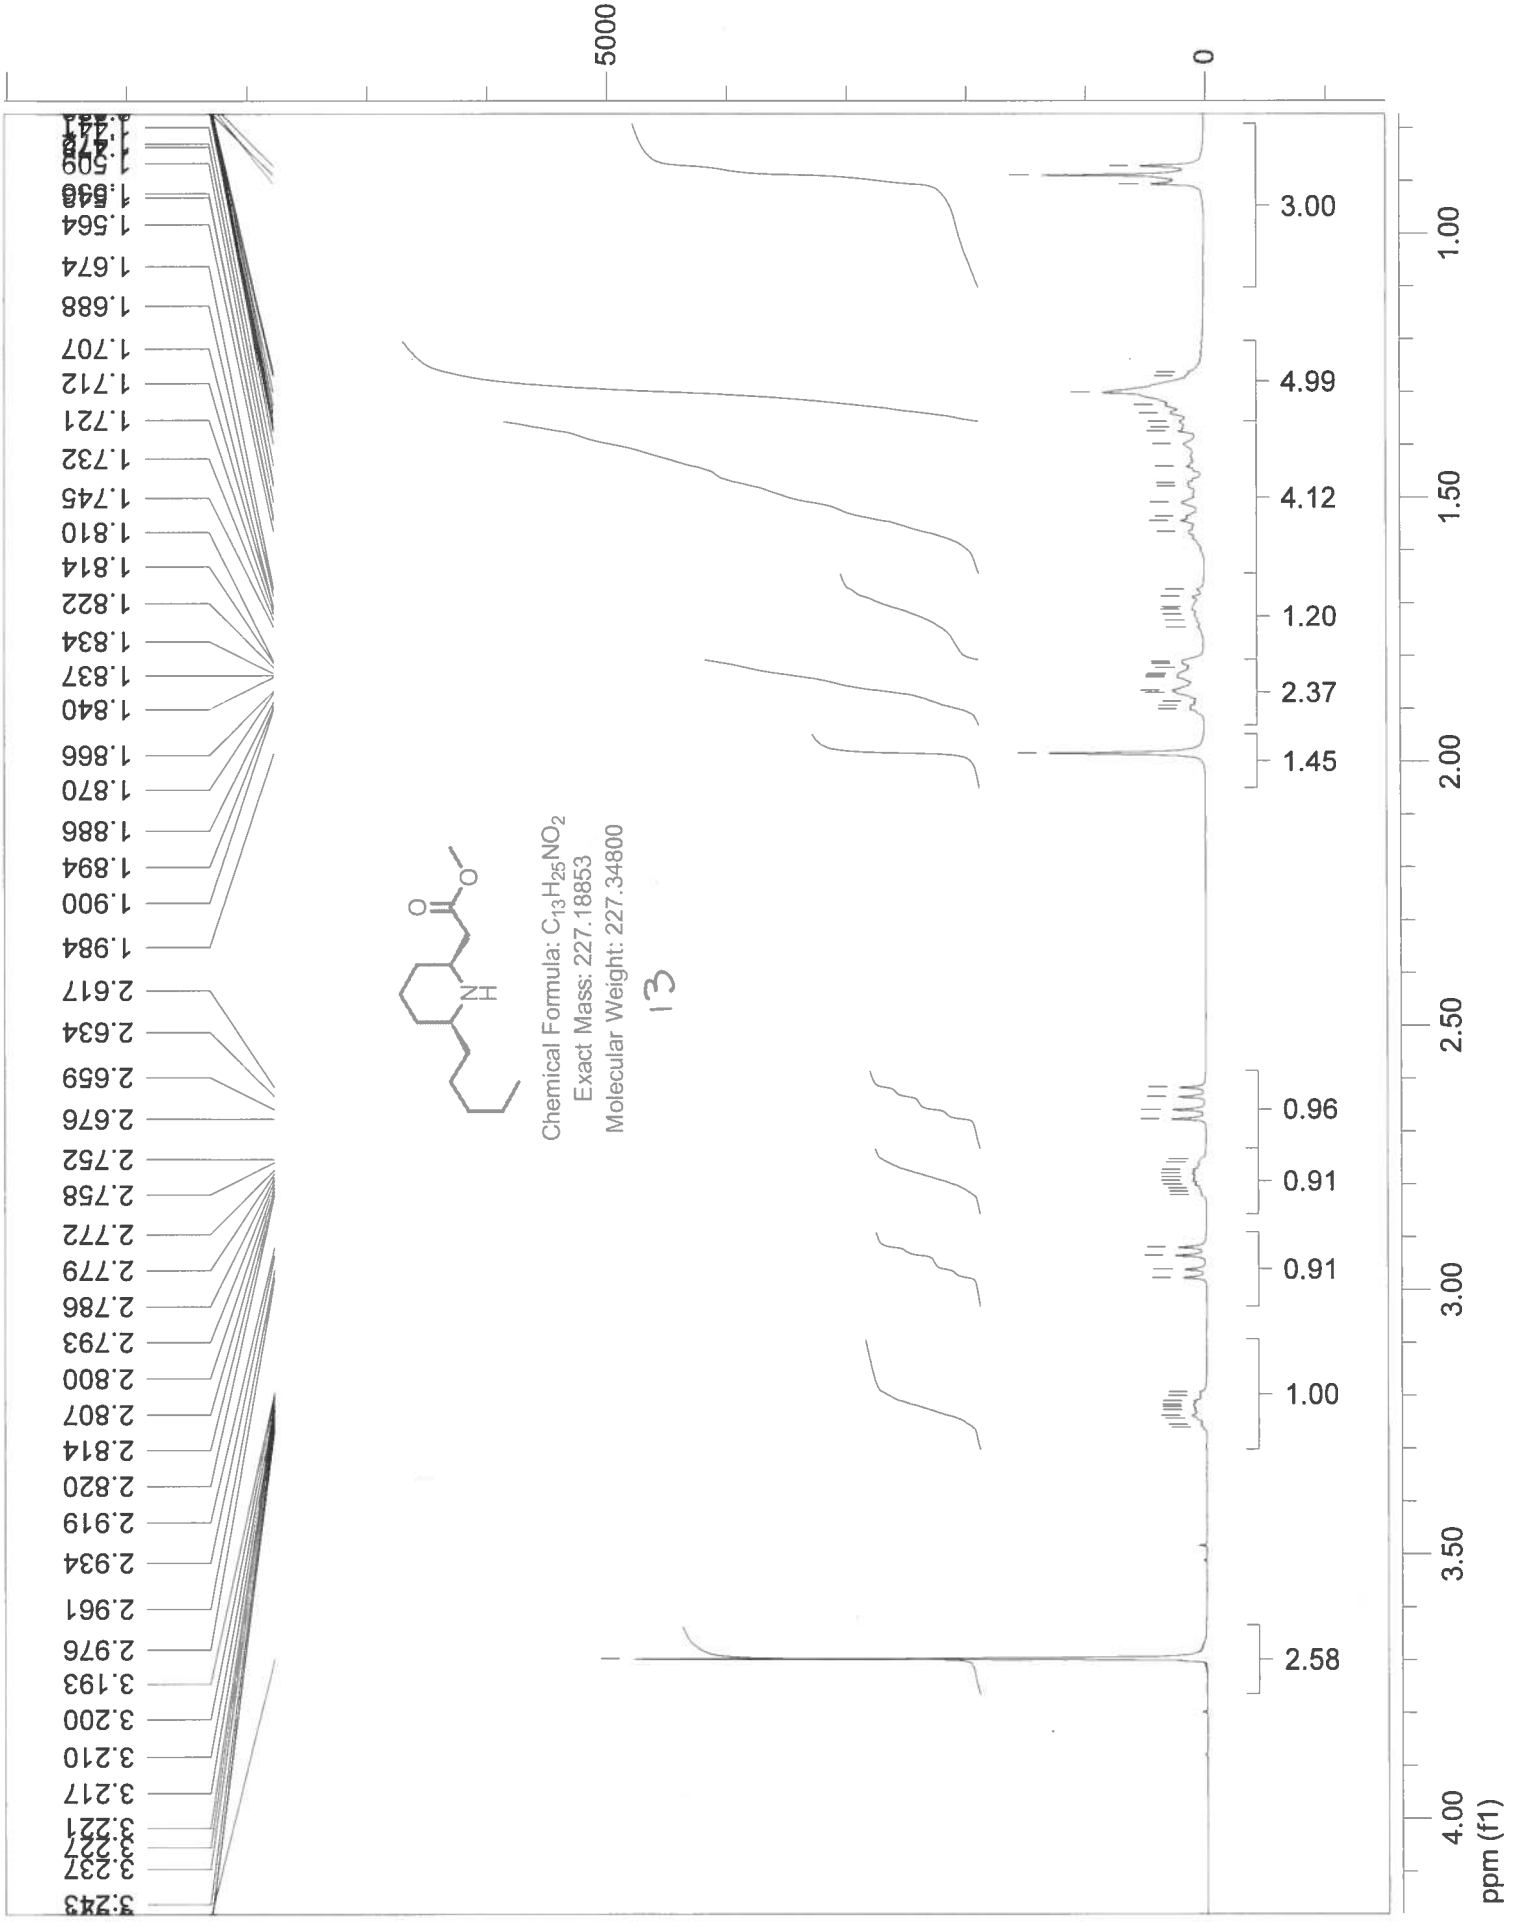

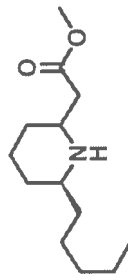

Chemical Formula: C<sub>13</sub>H<sub>25</sub>NO<sub>2</sub>  
Exact Mass: 227.18853  
Molecular Weight: 227.34800

13

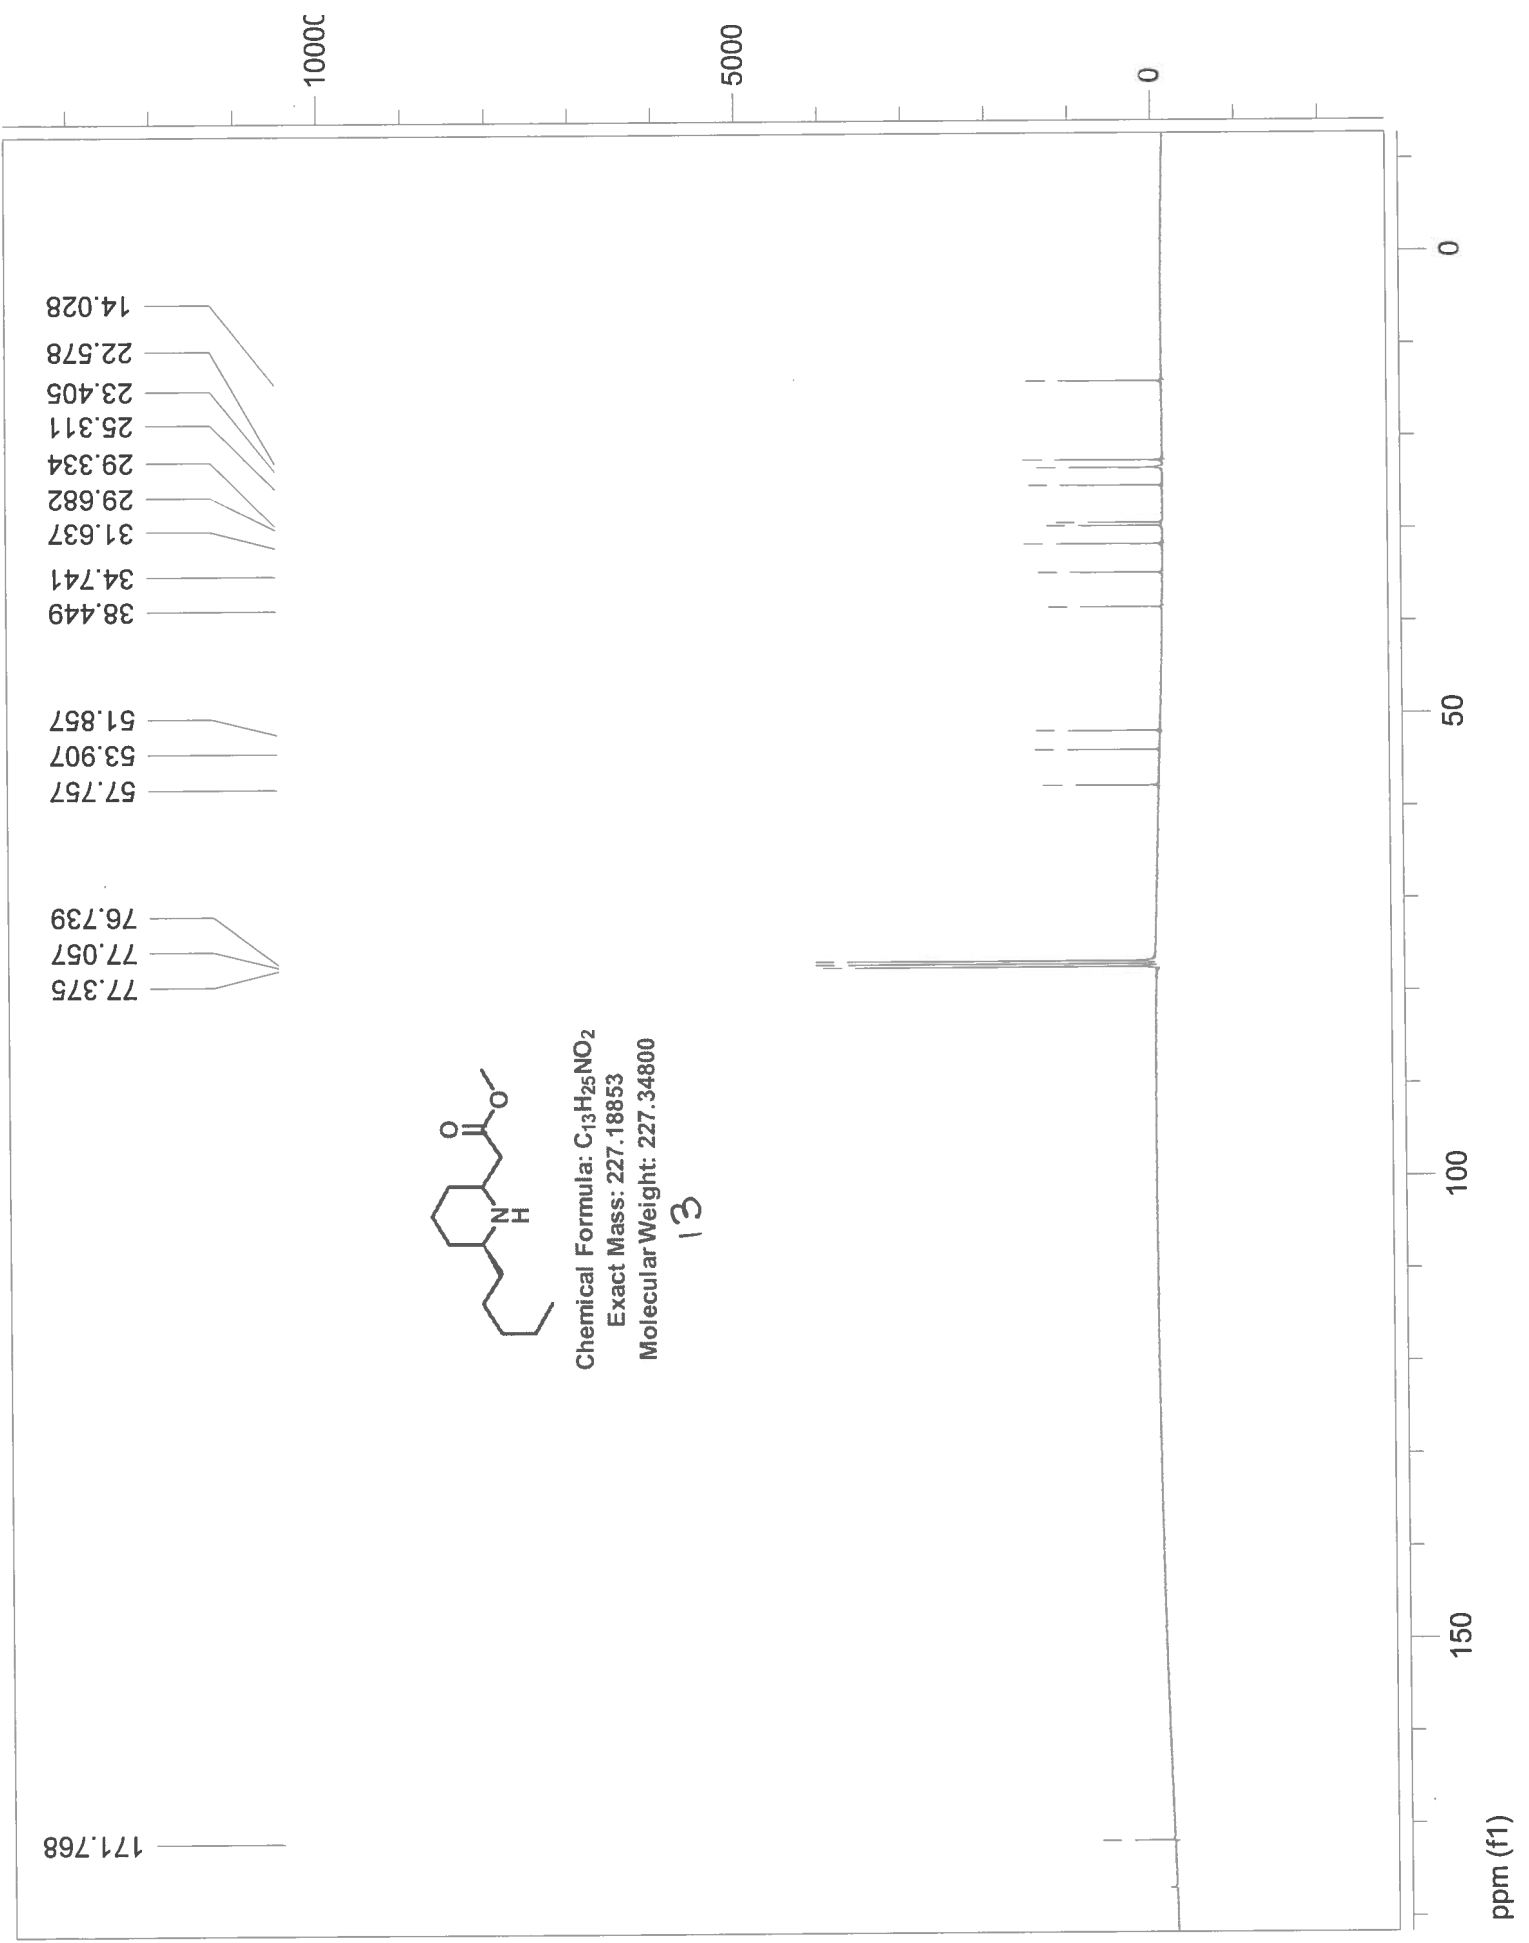

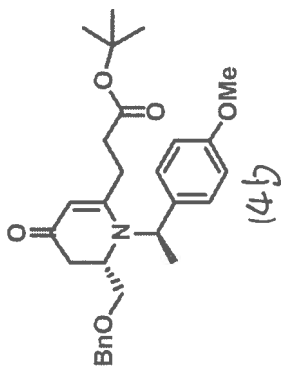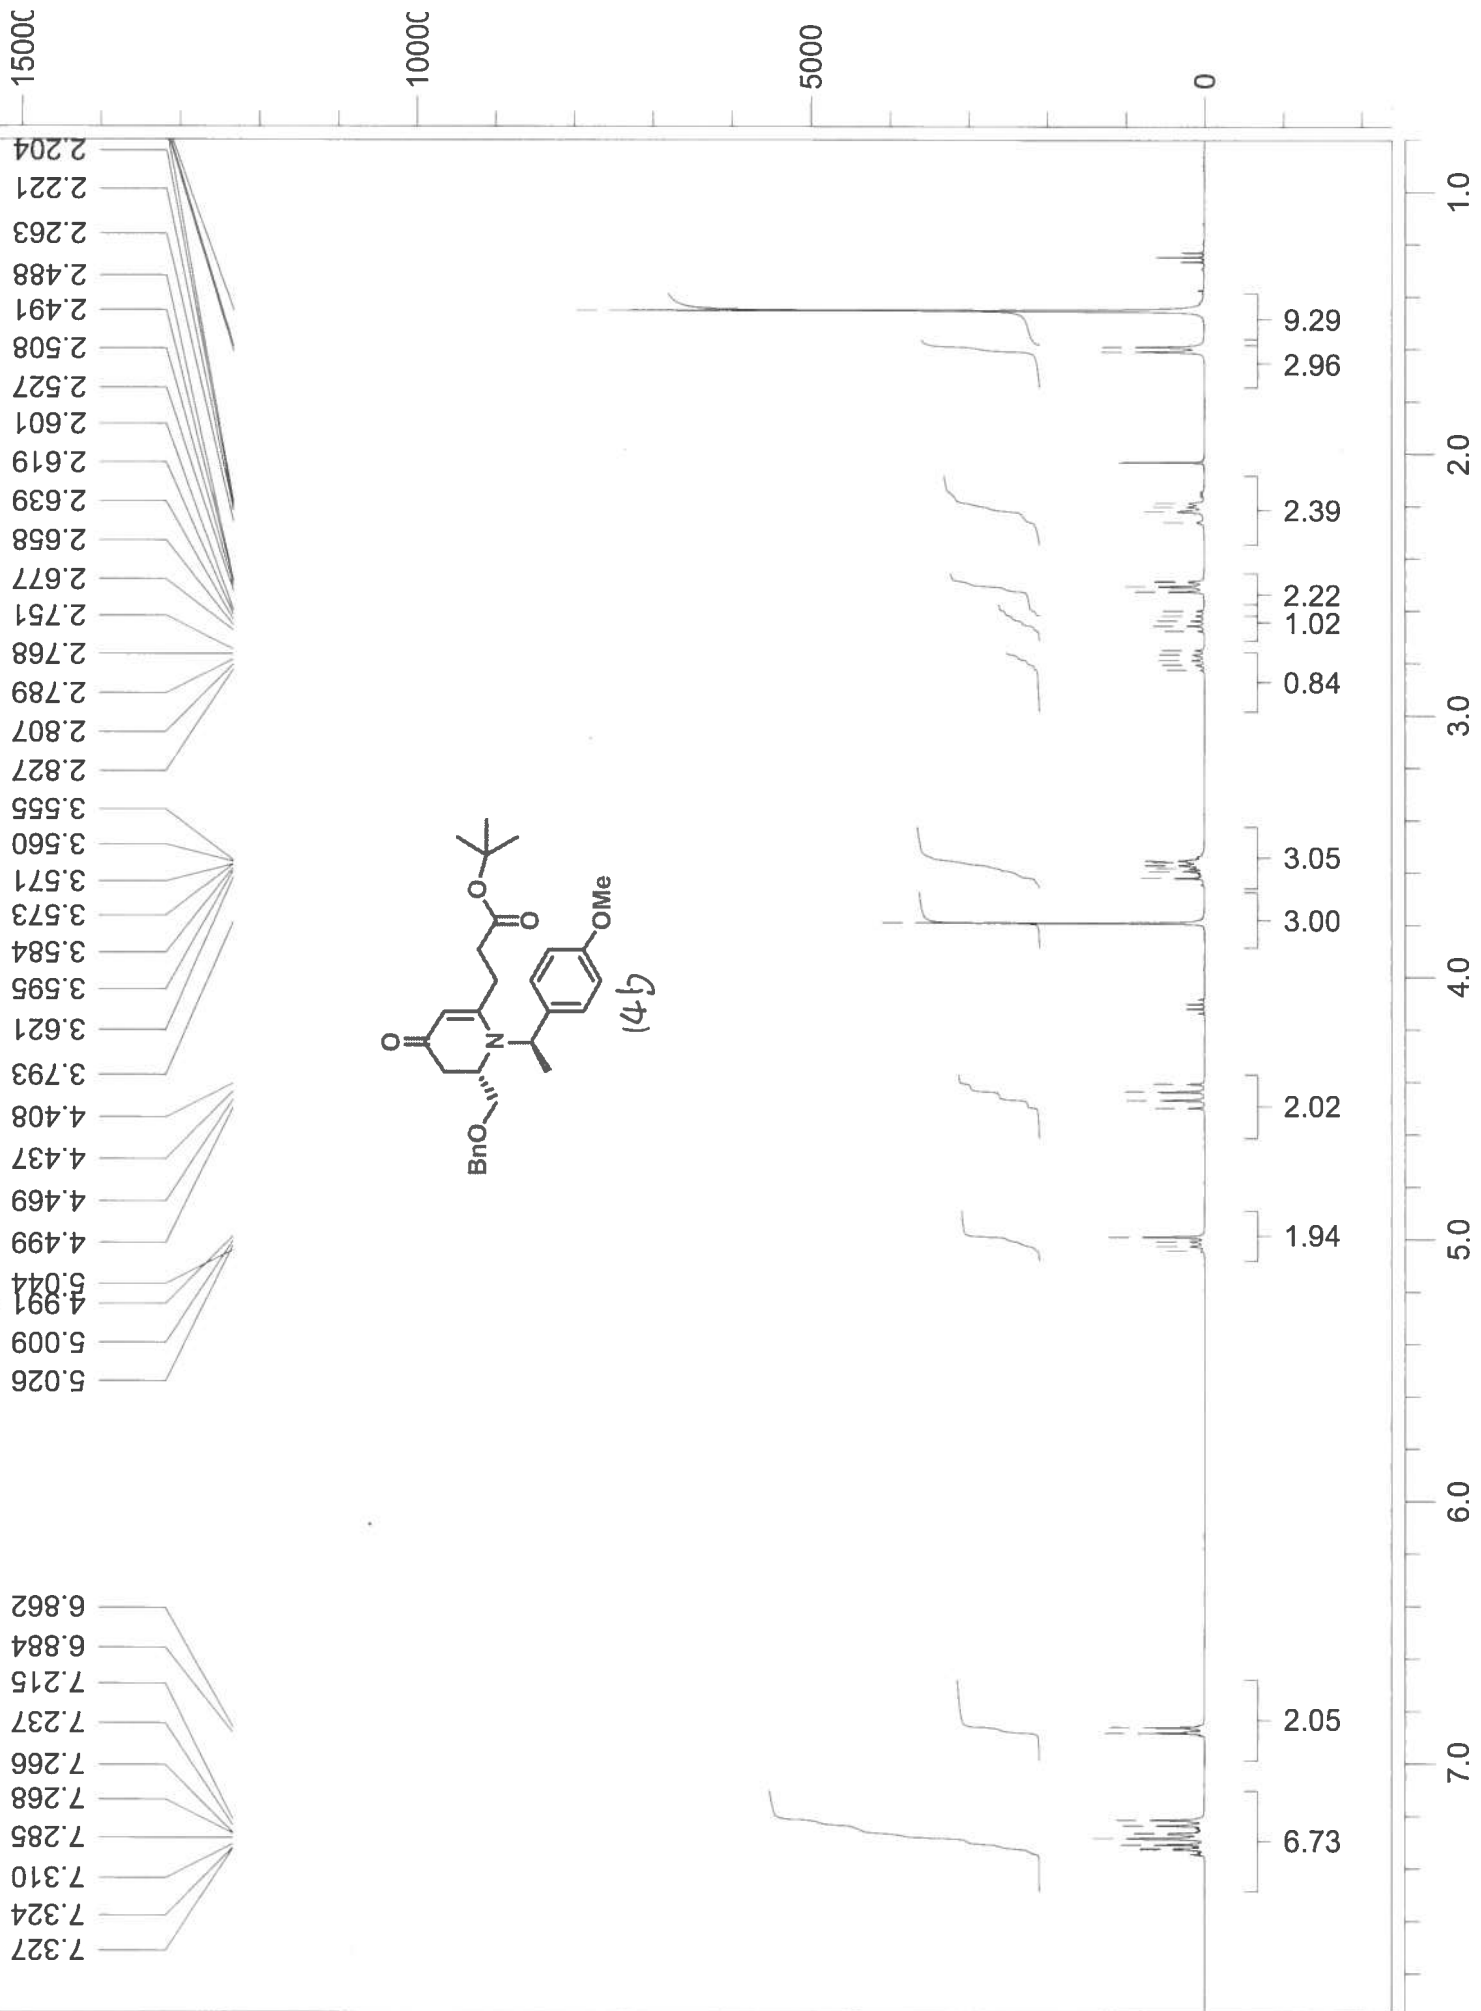



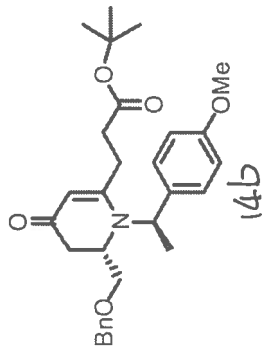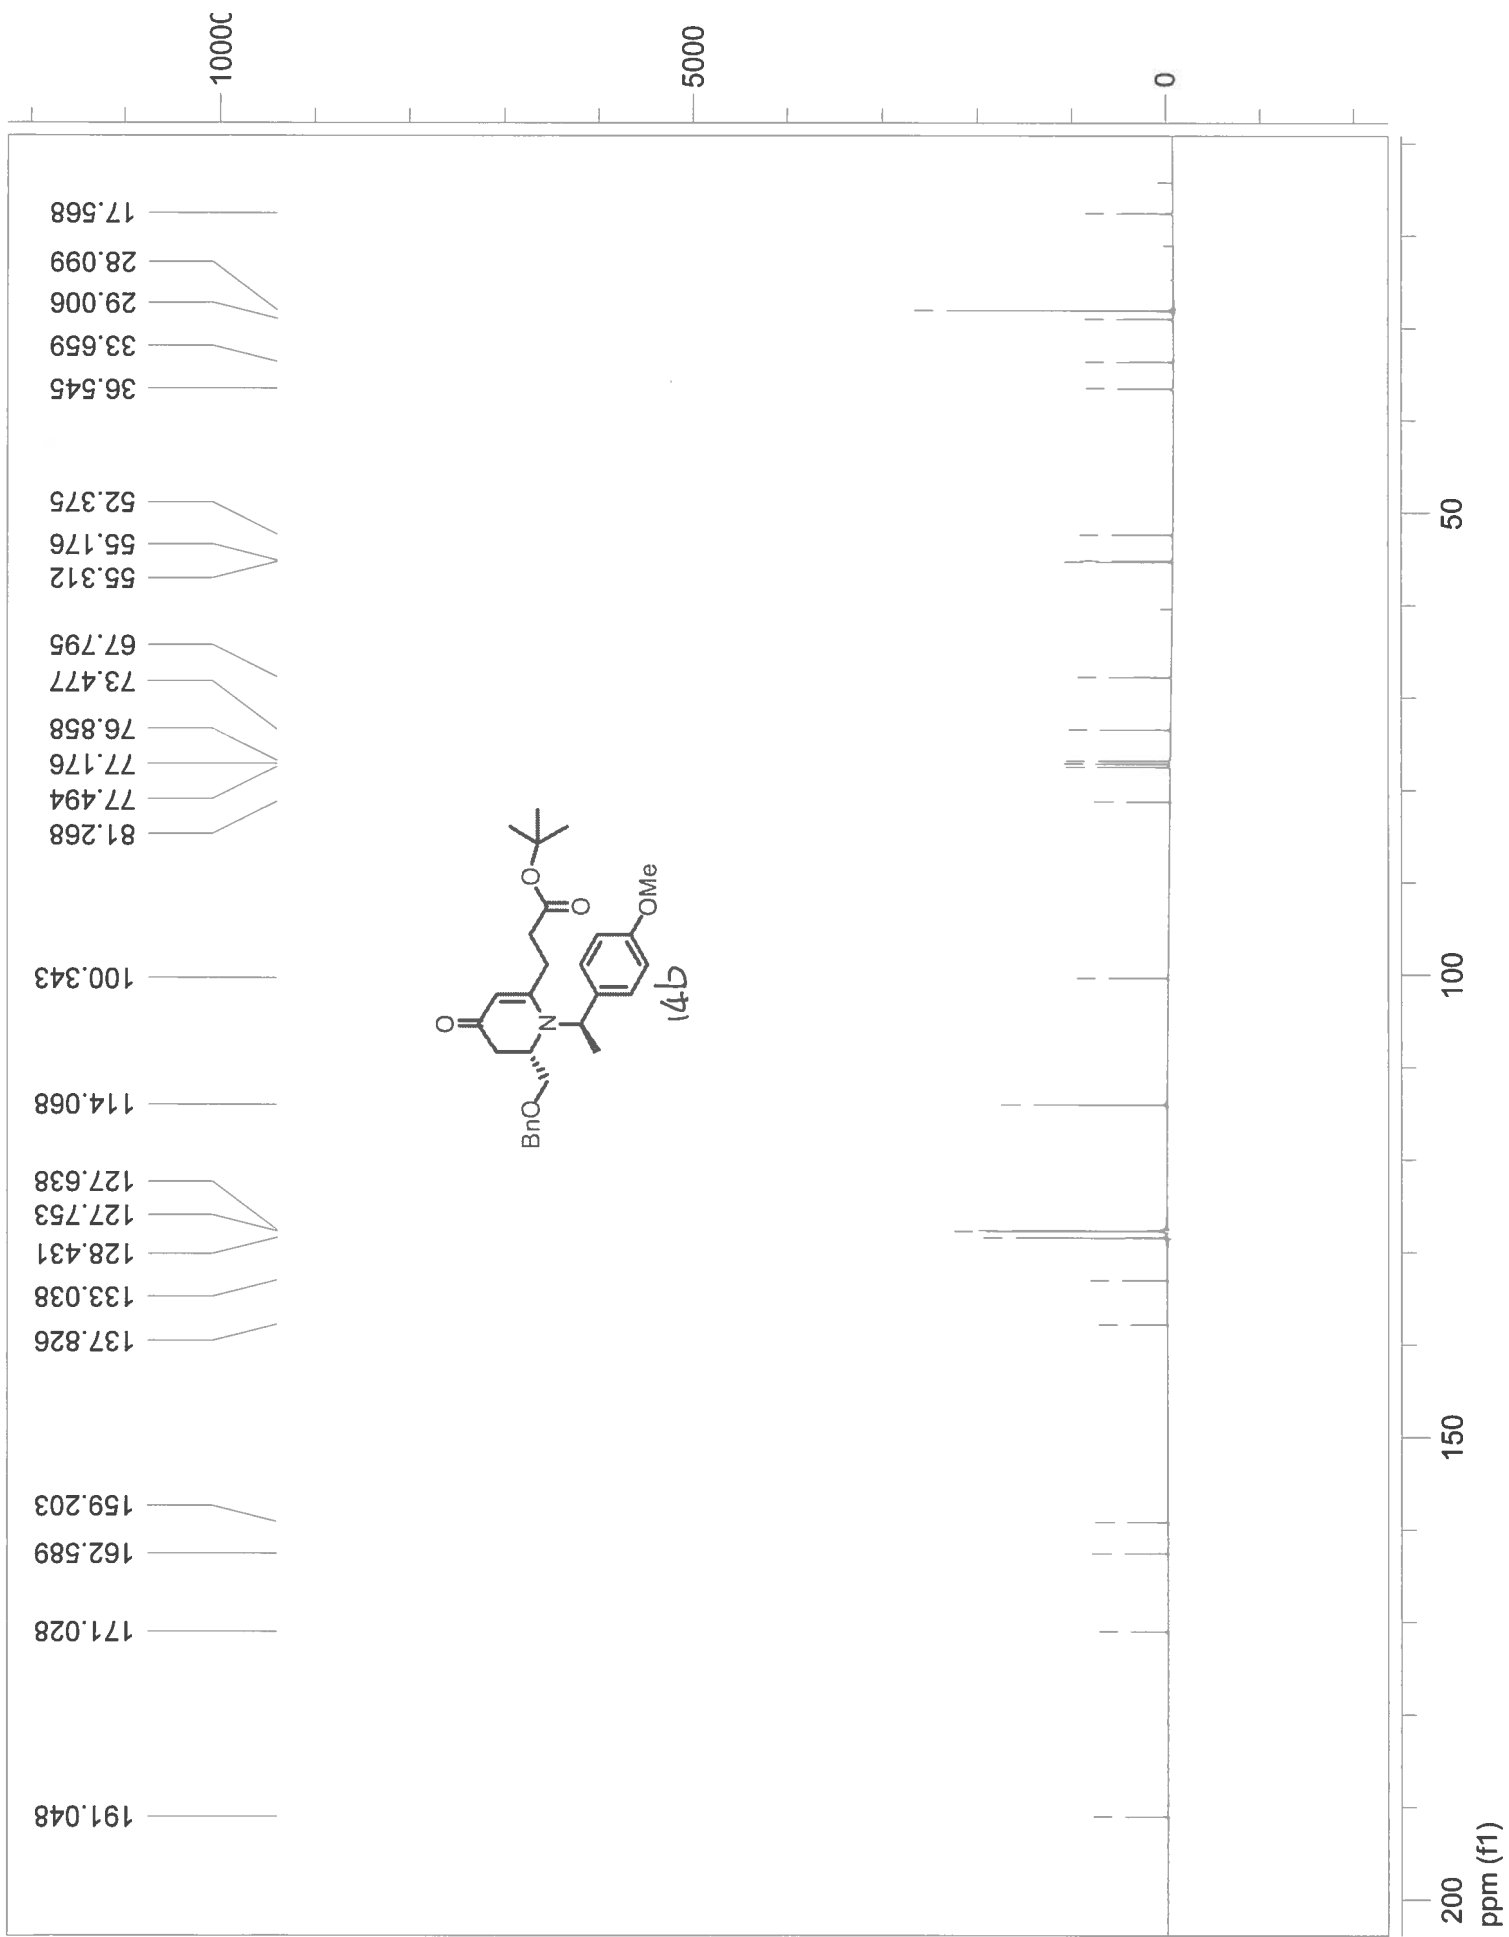

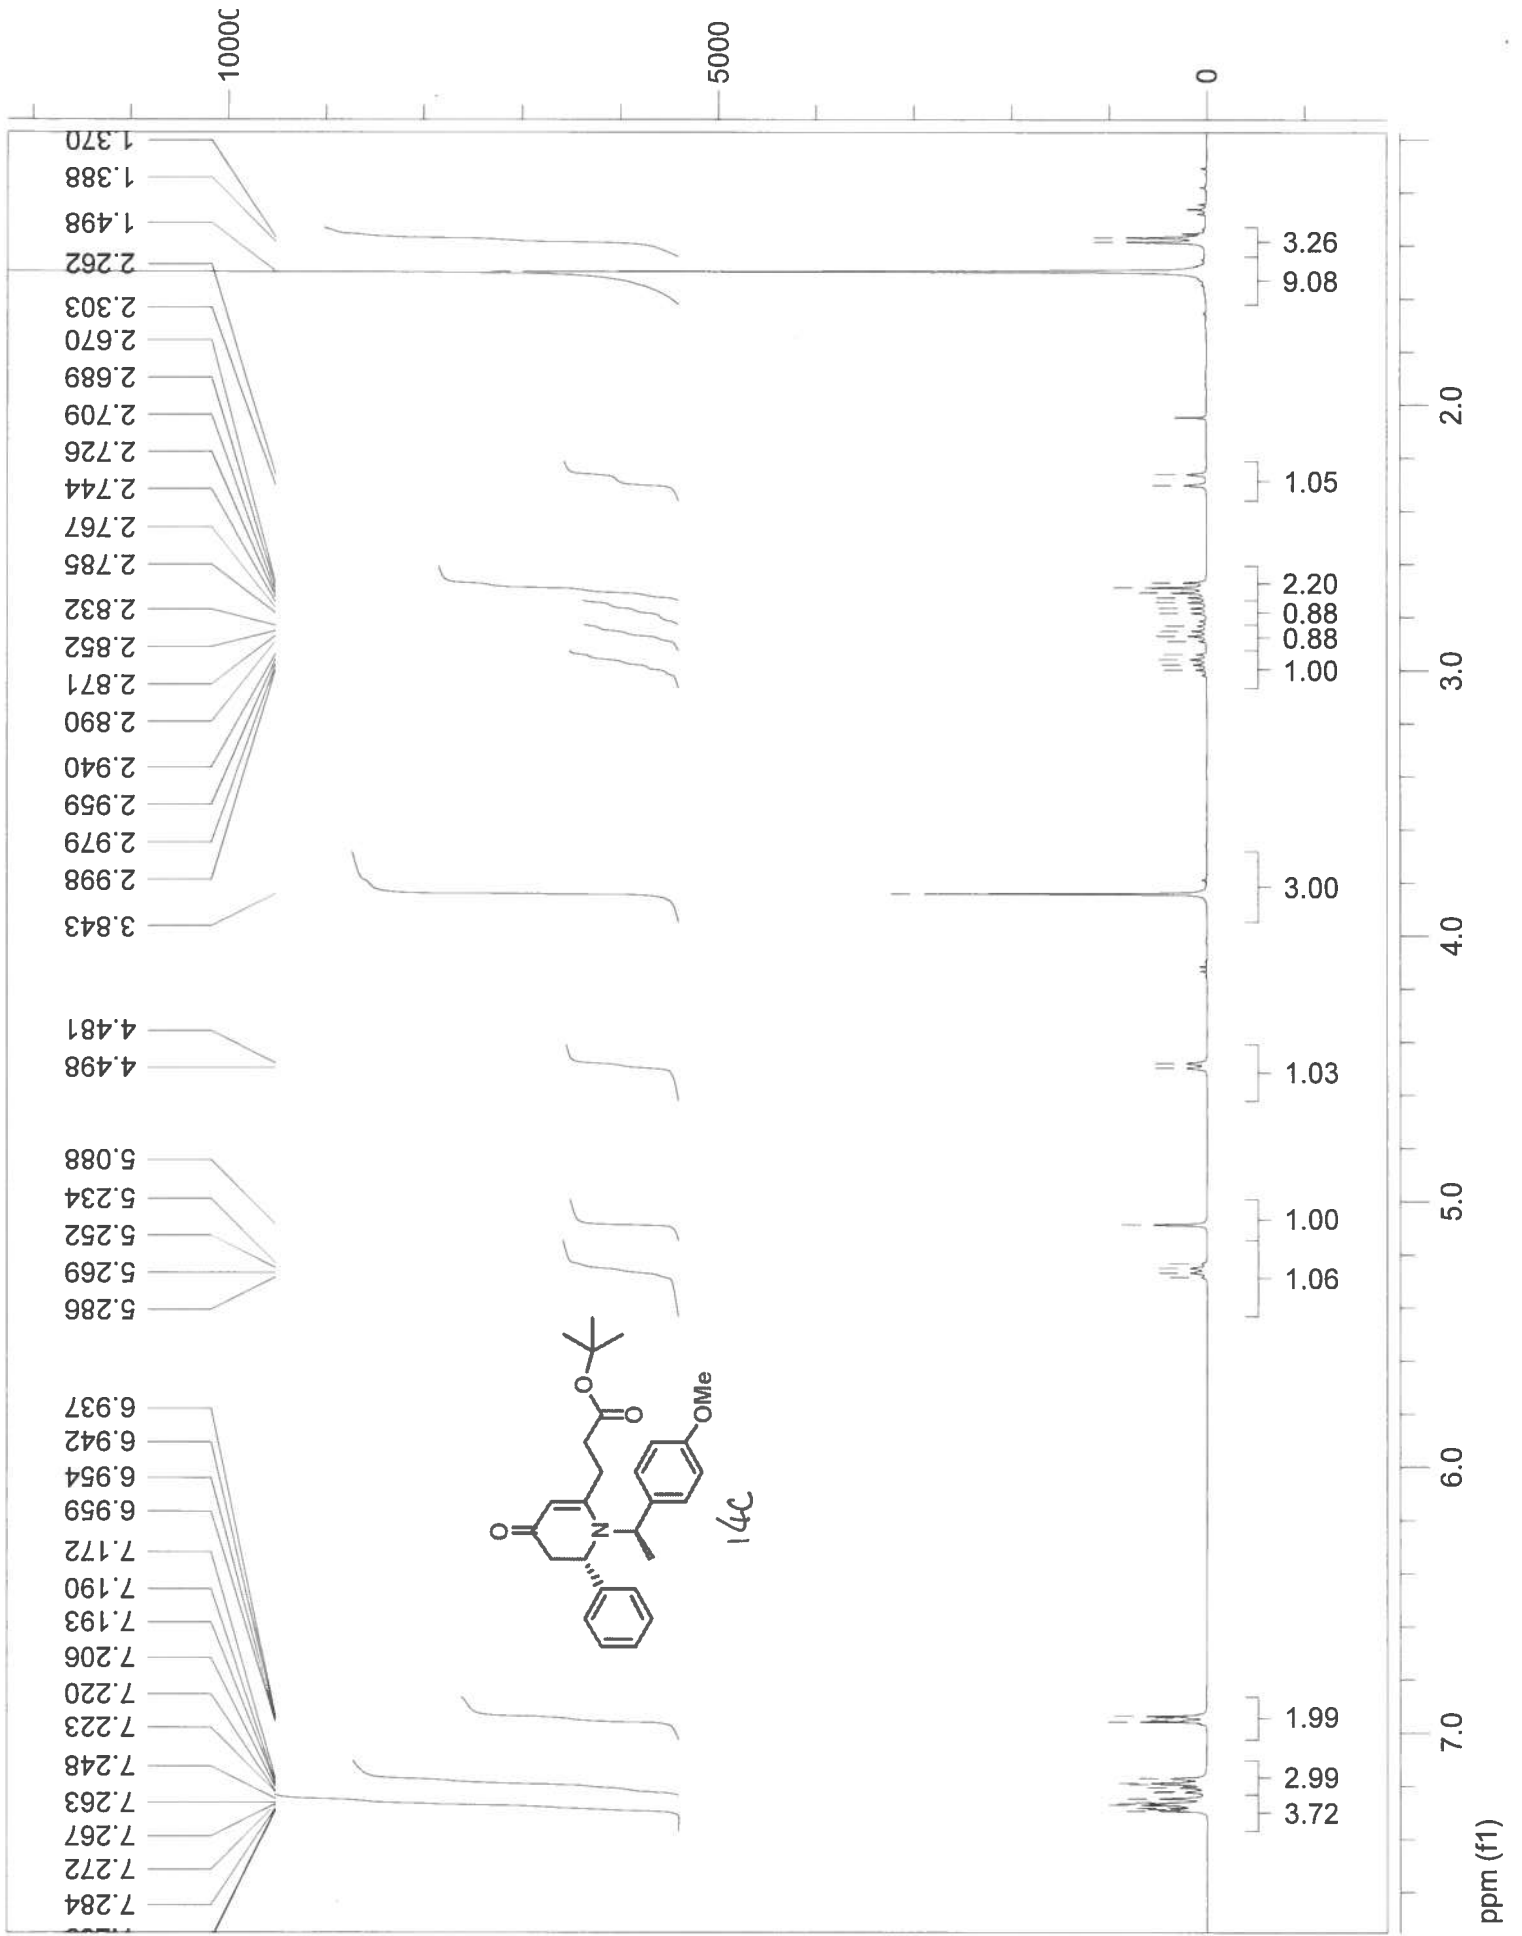

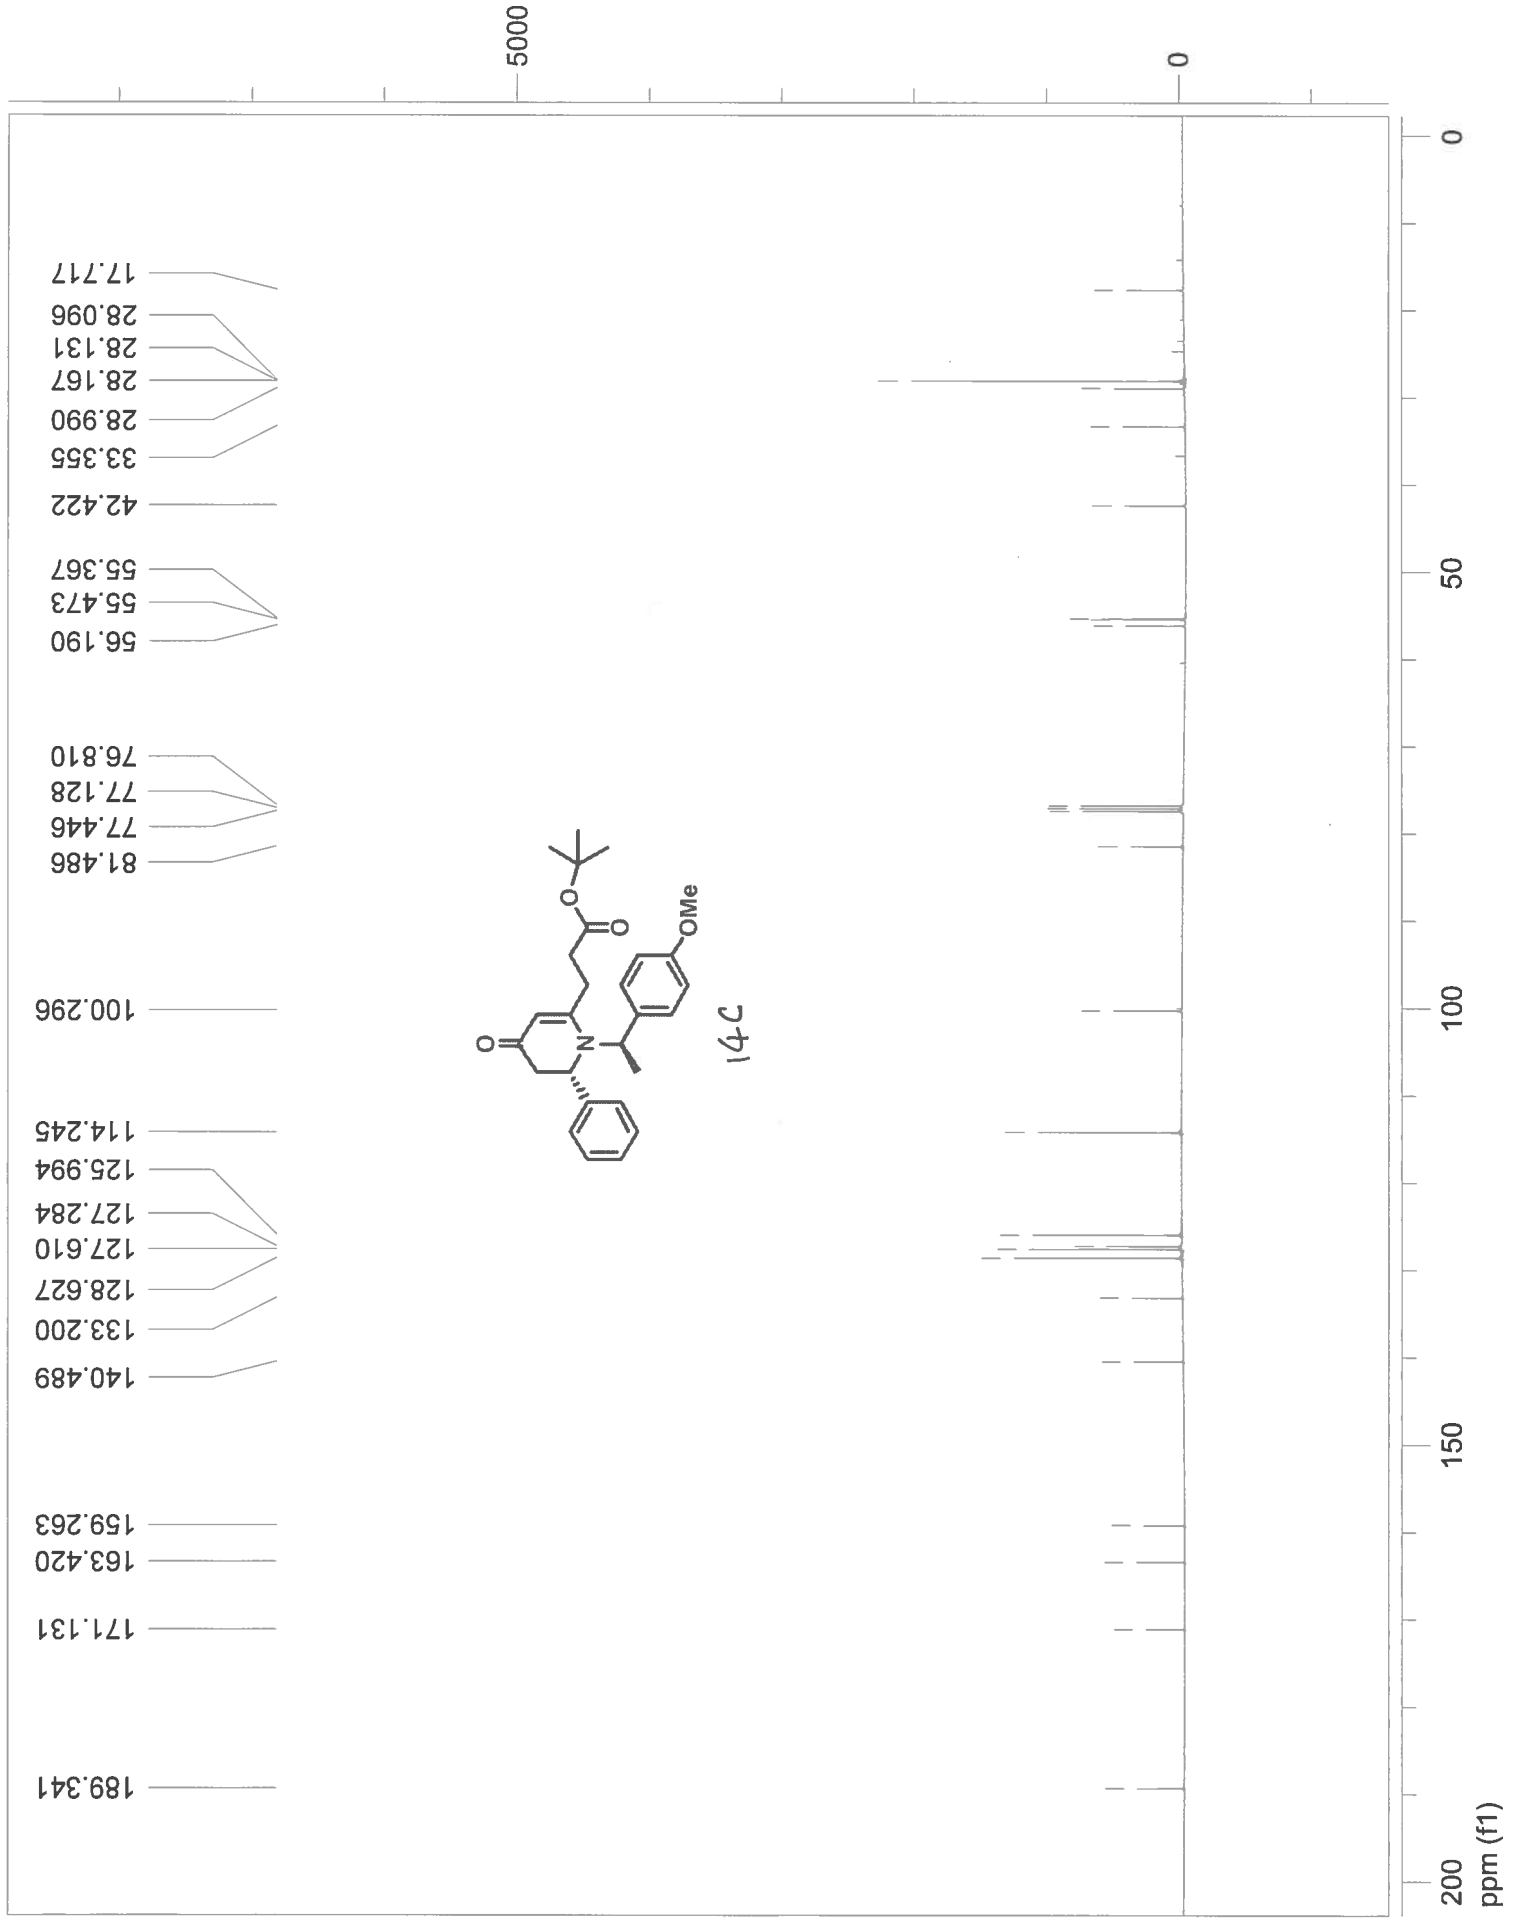

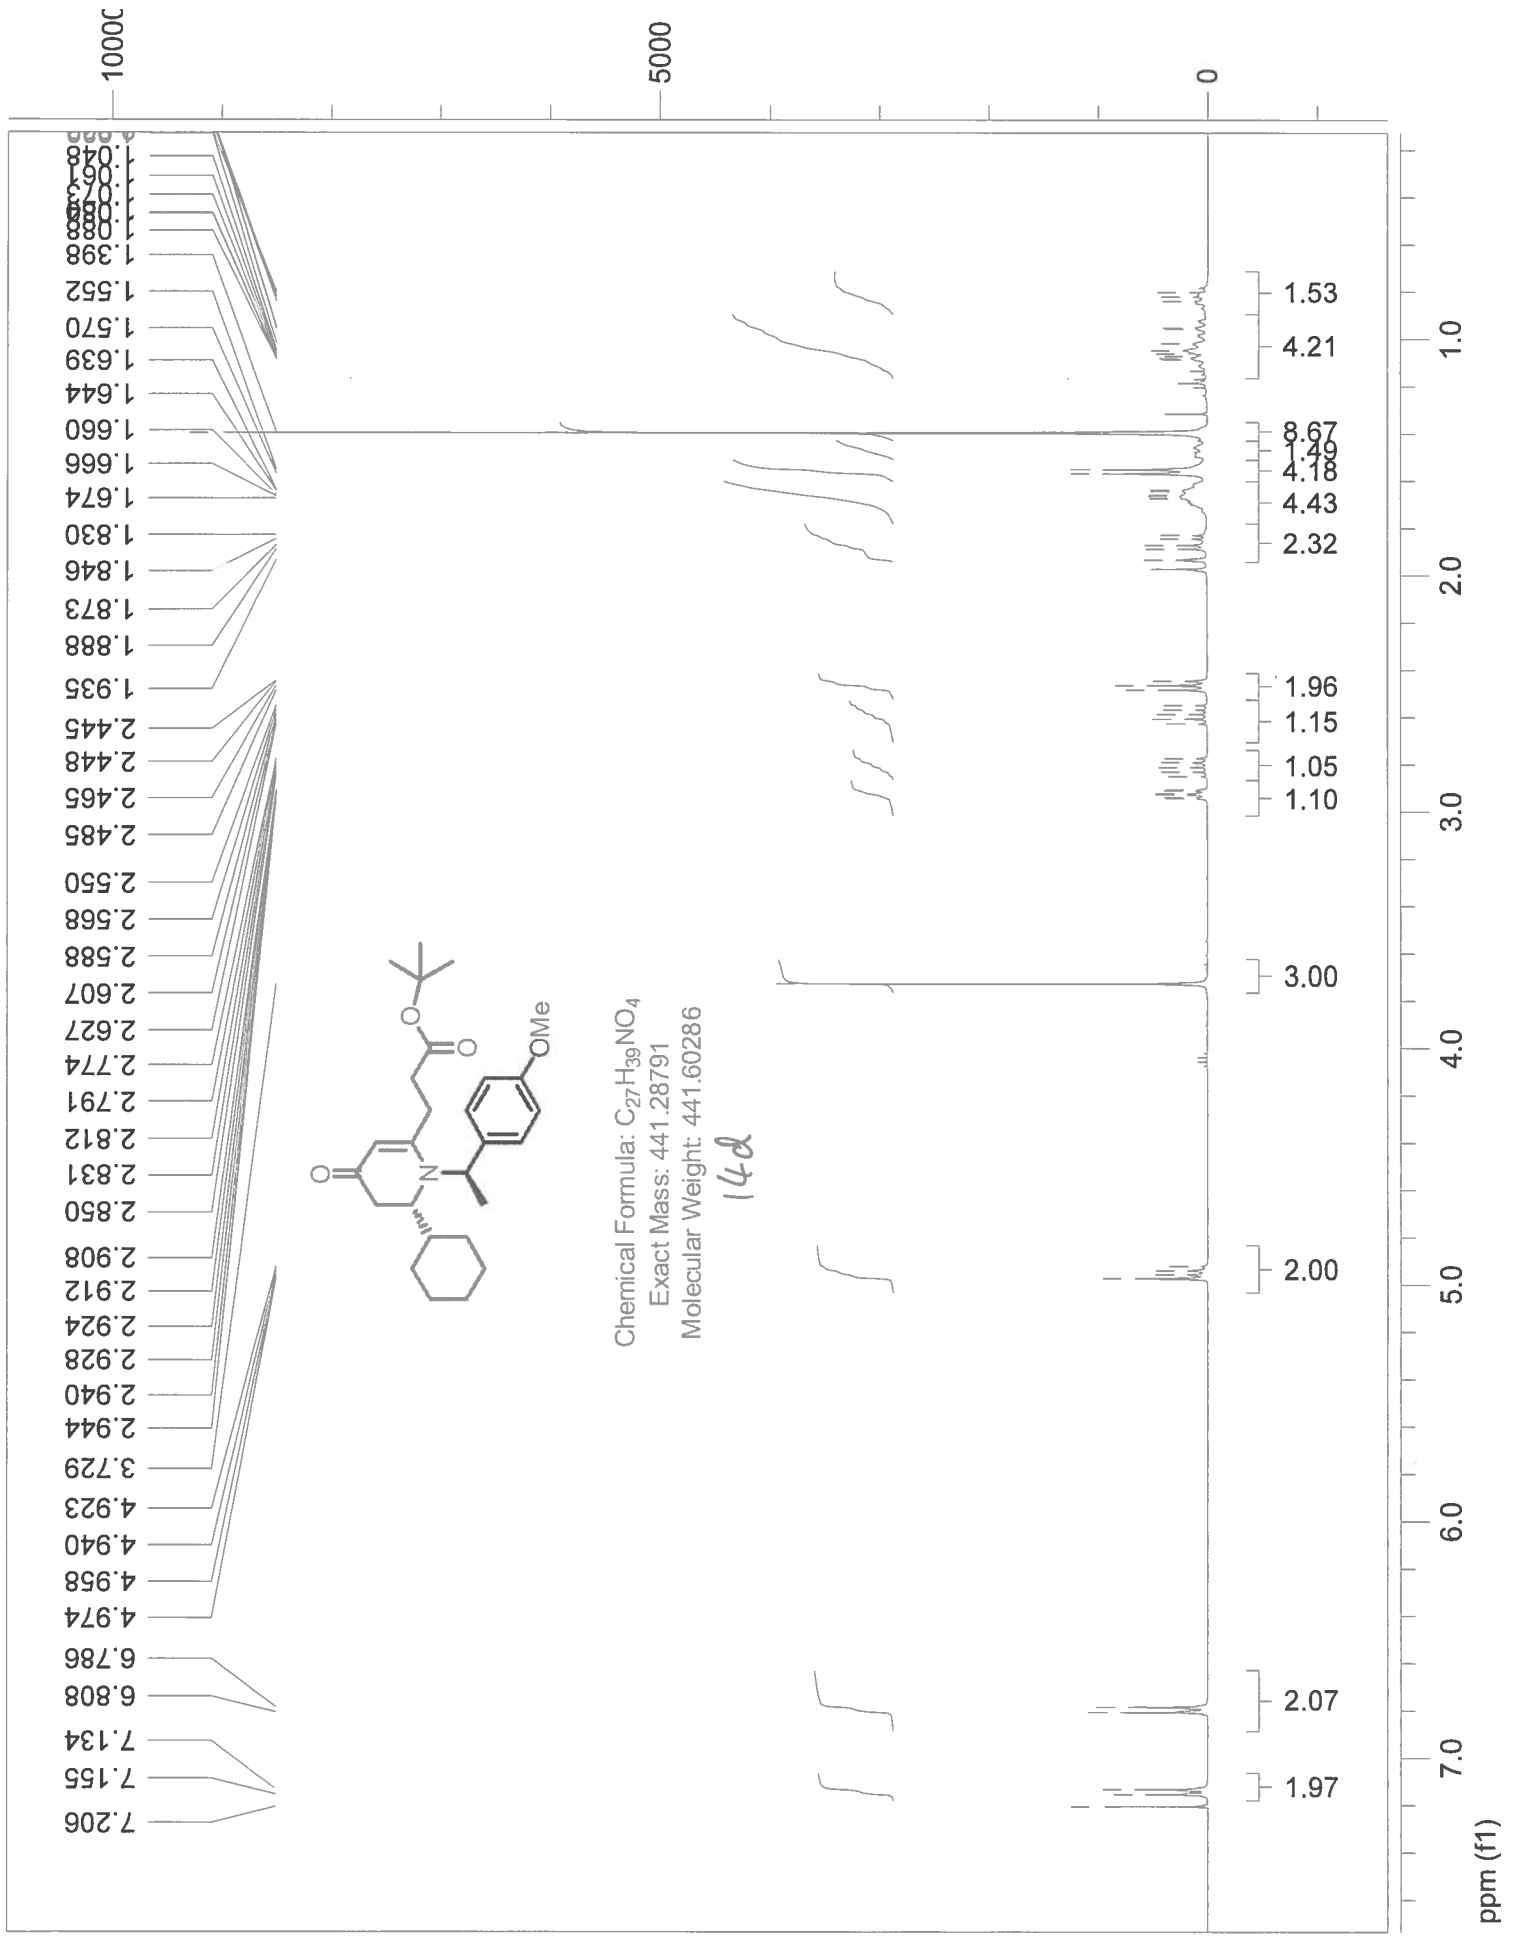

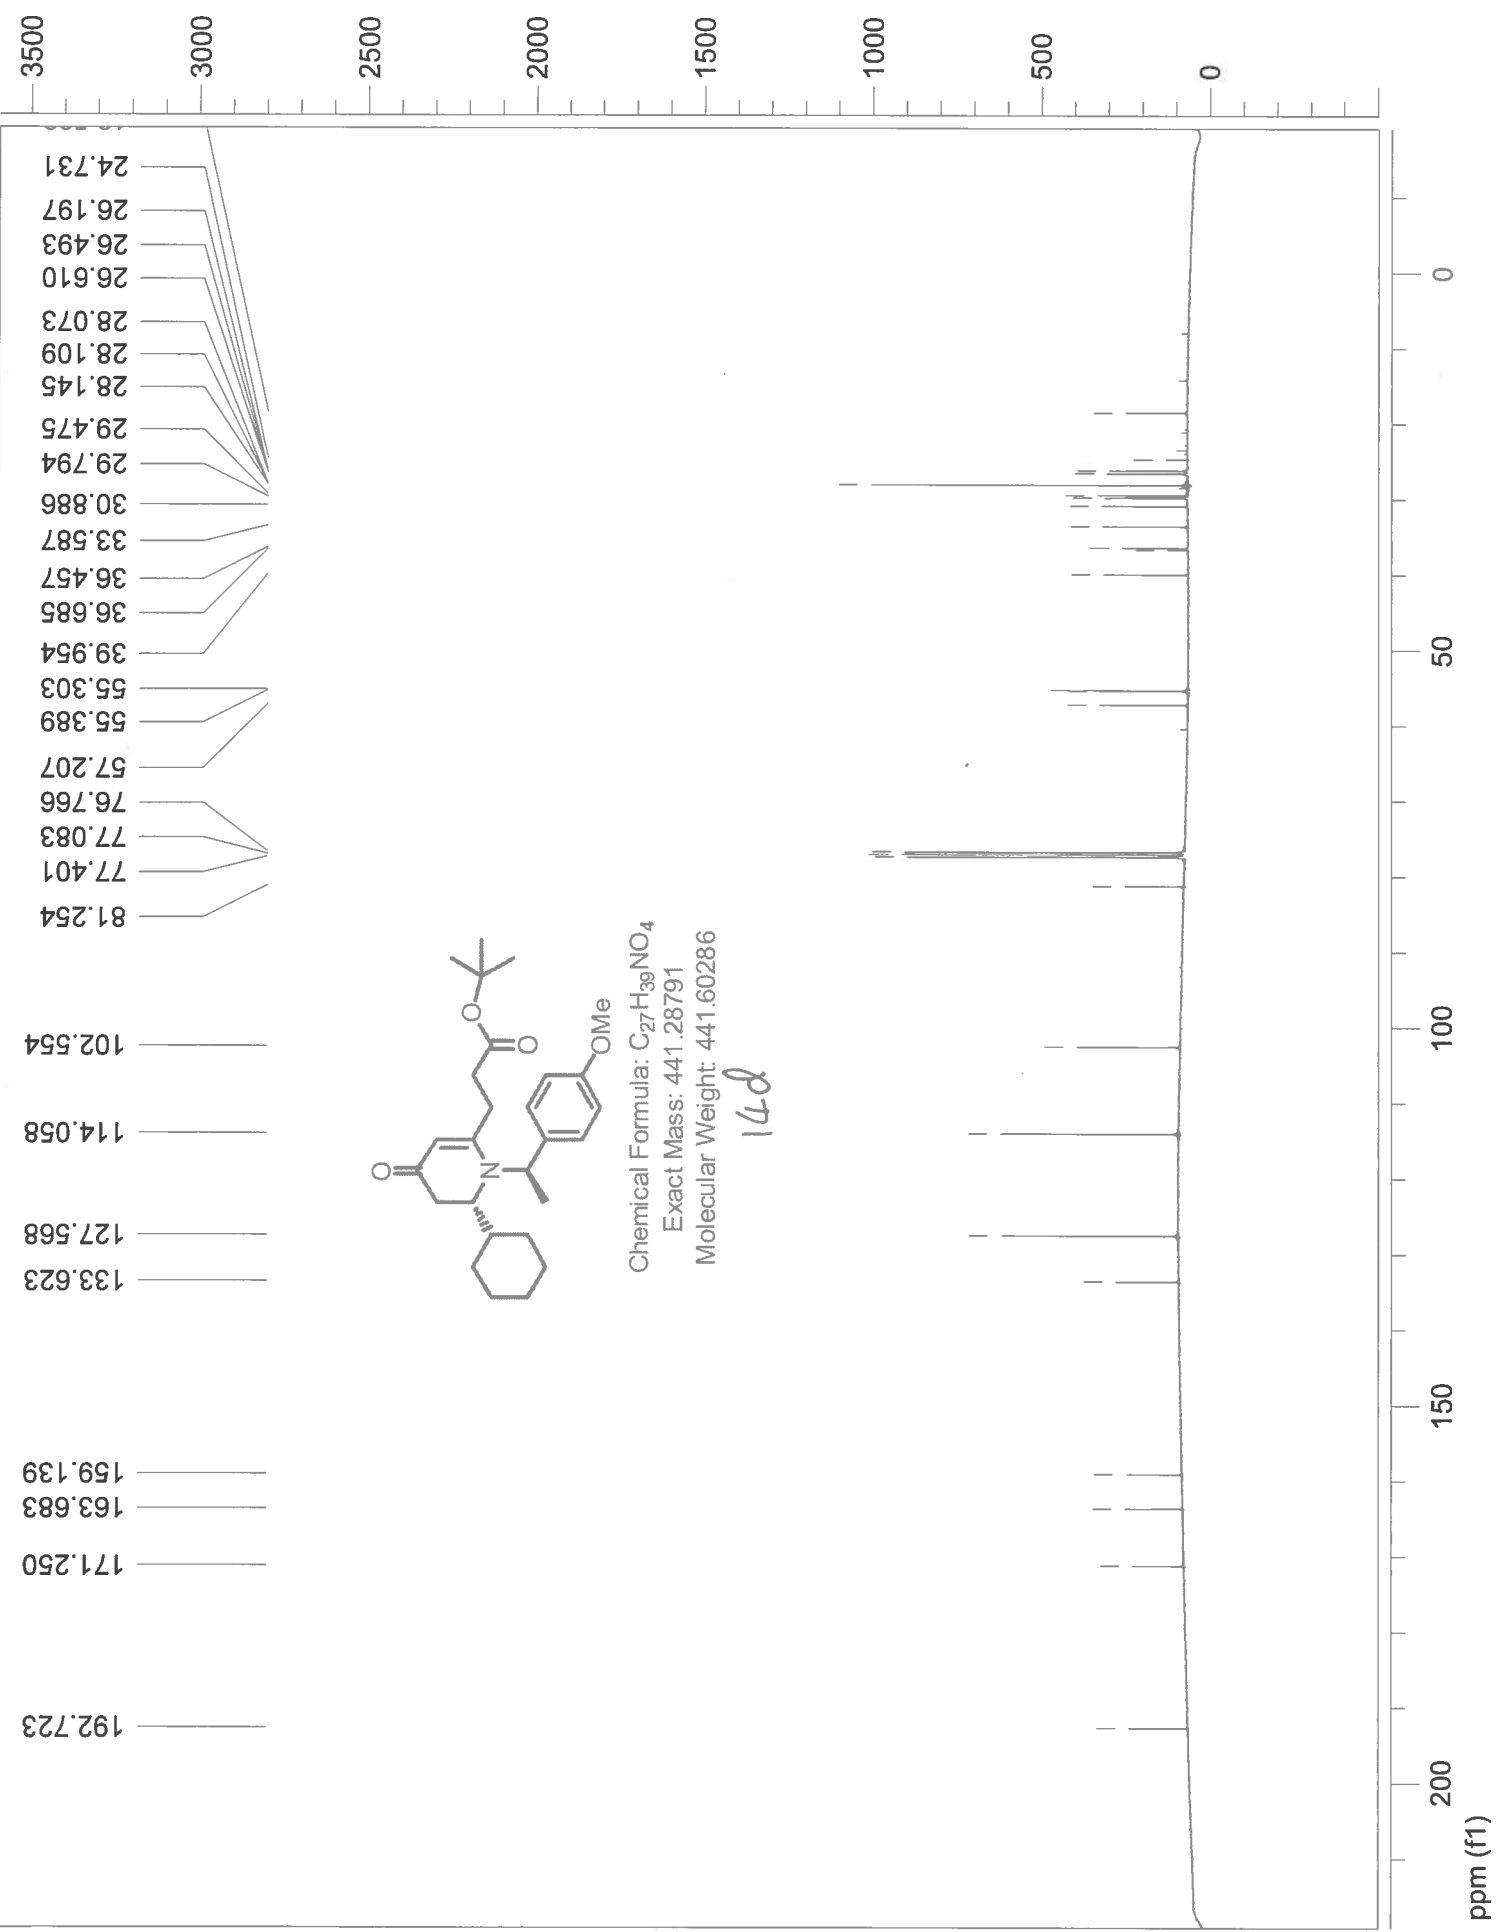

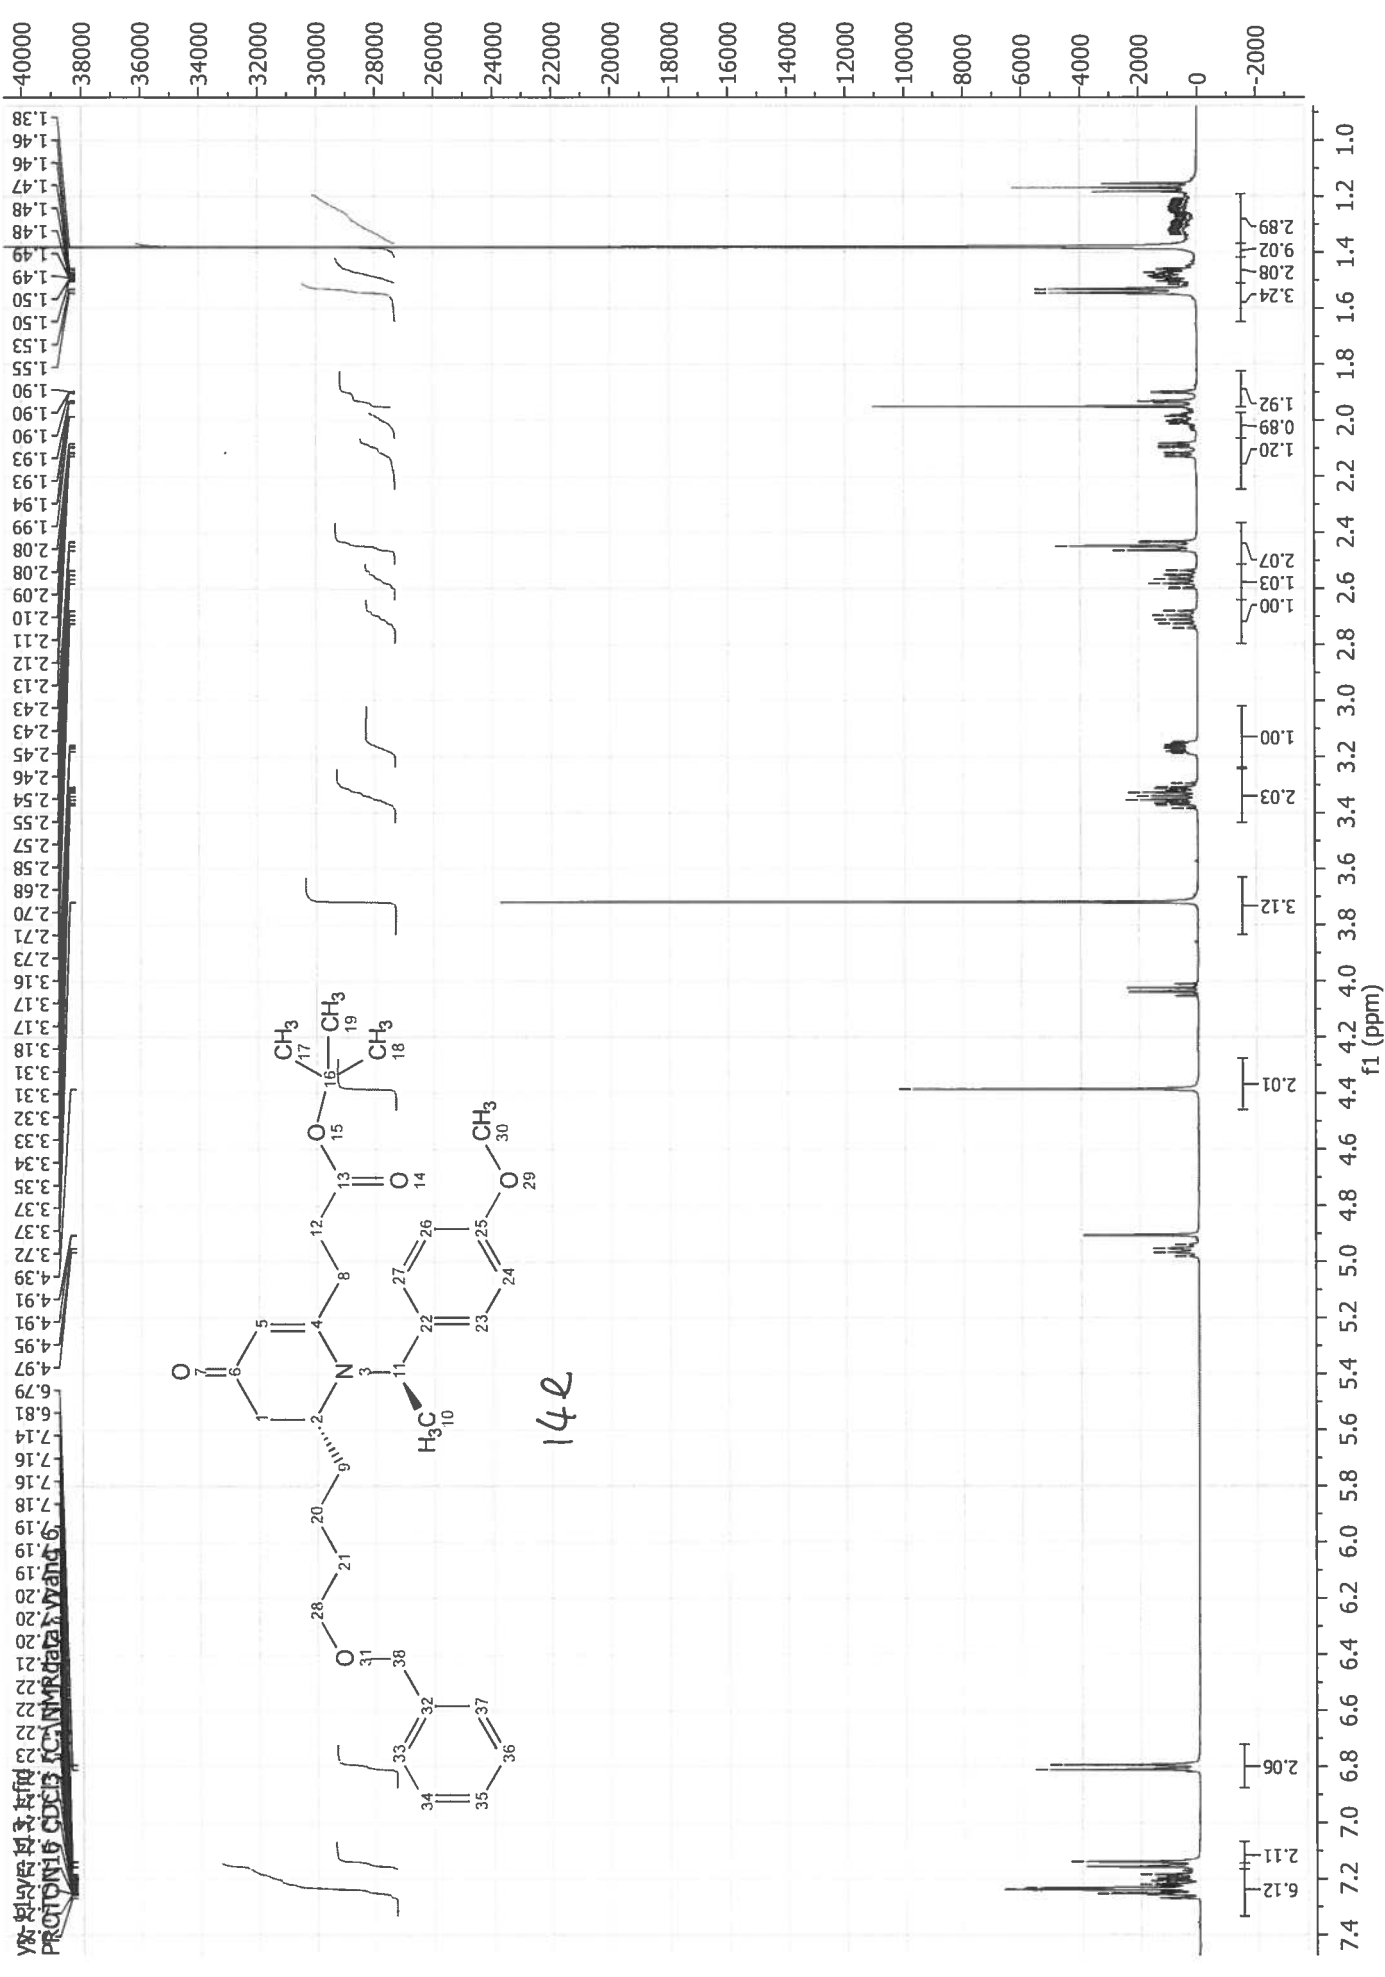

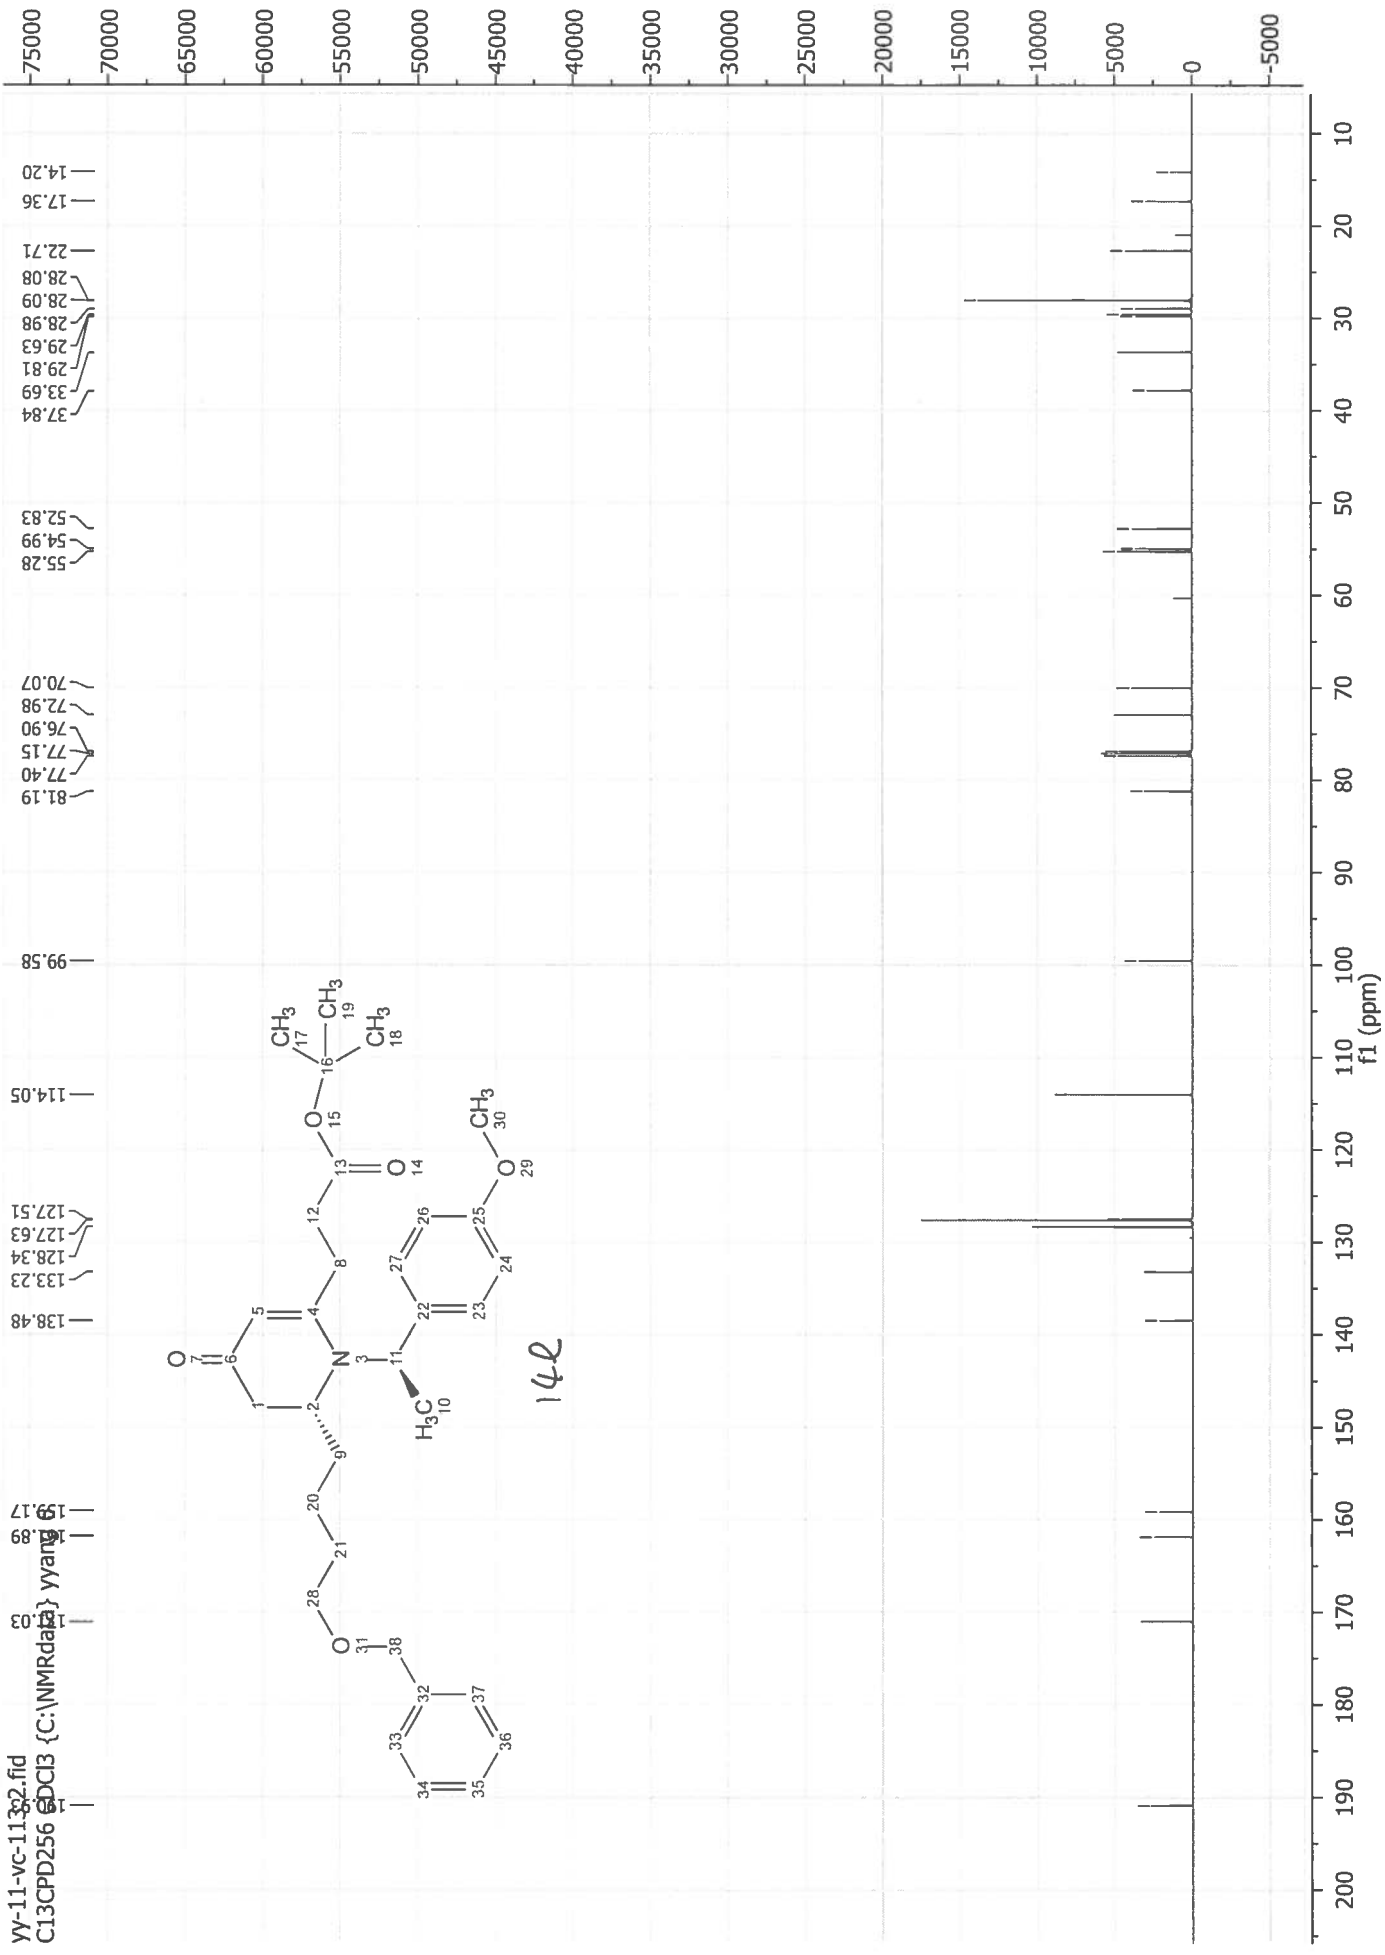

yy-11-vc-1132.fid  
 C13CPD256 {C:\NMRdata\} yyang 6

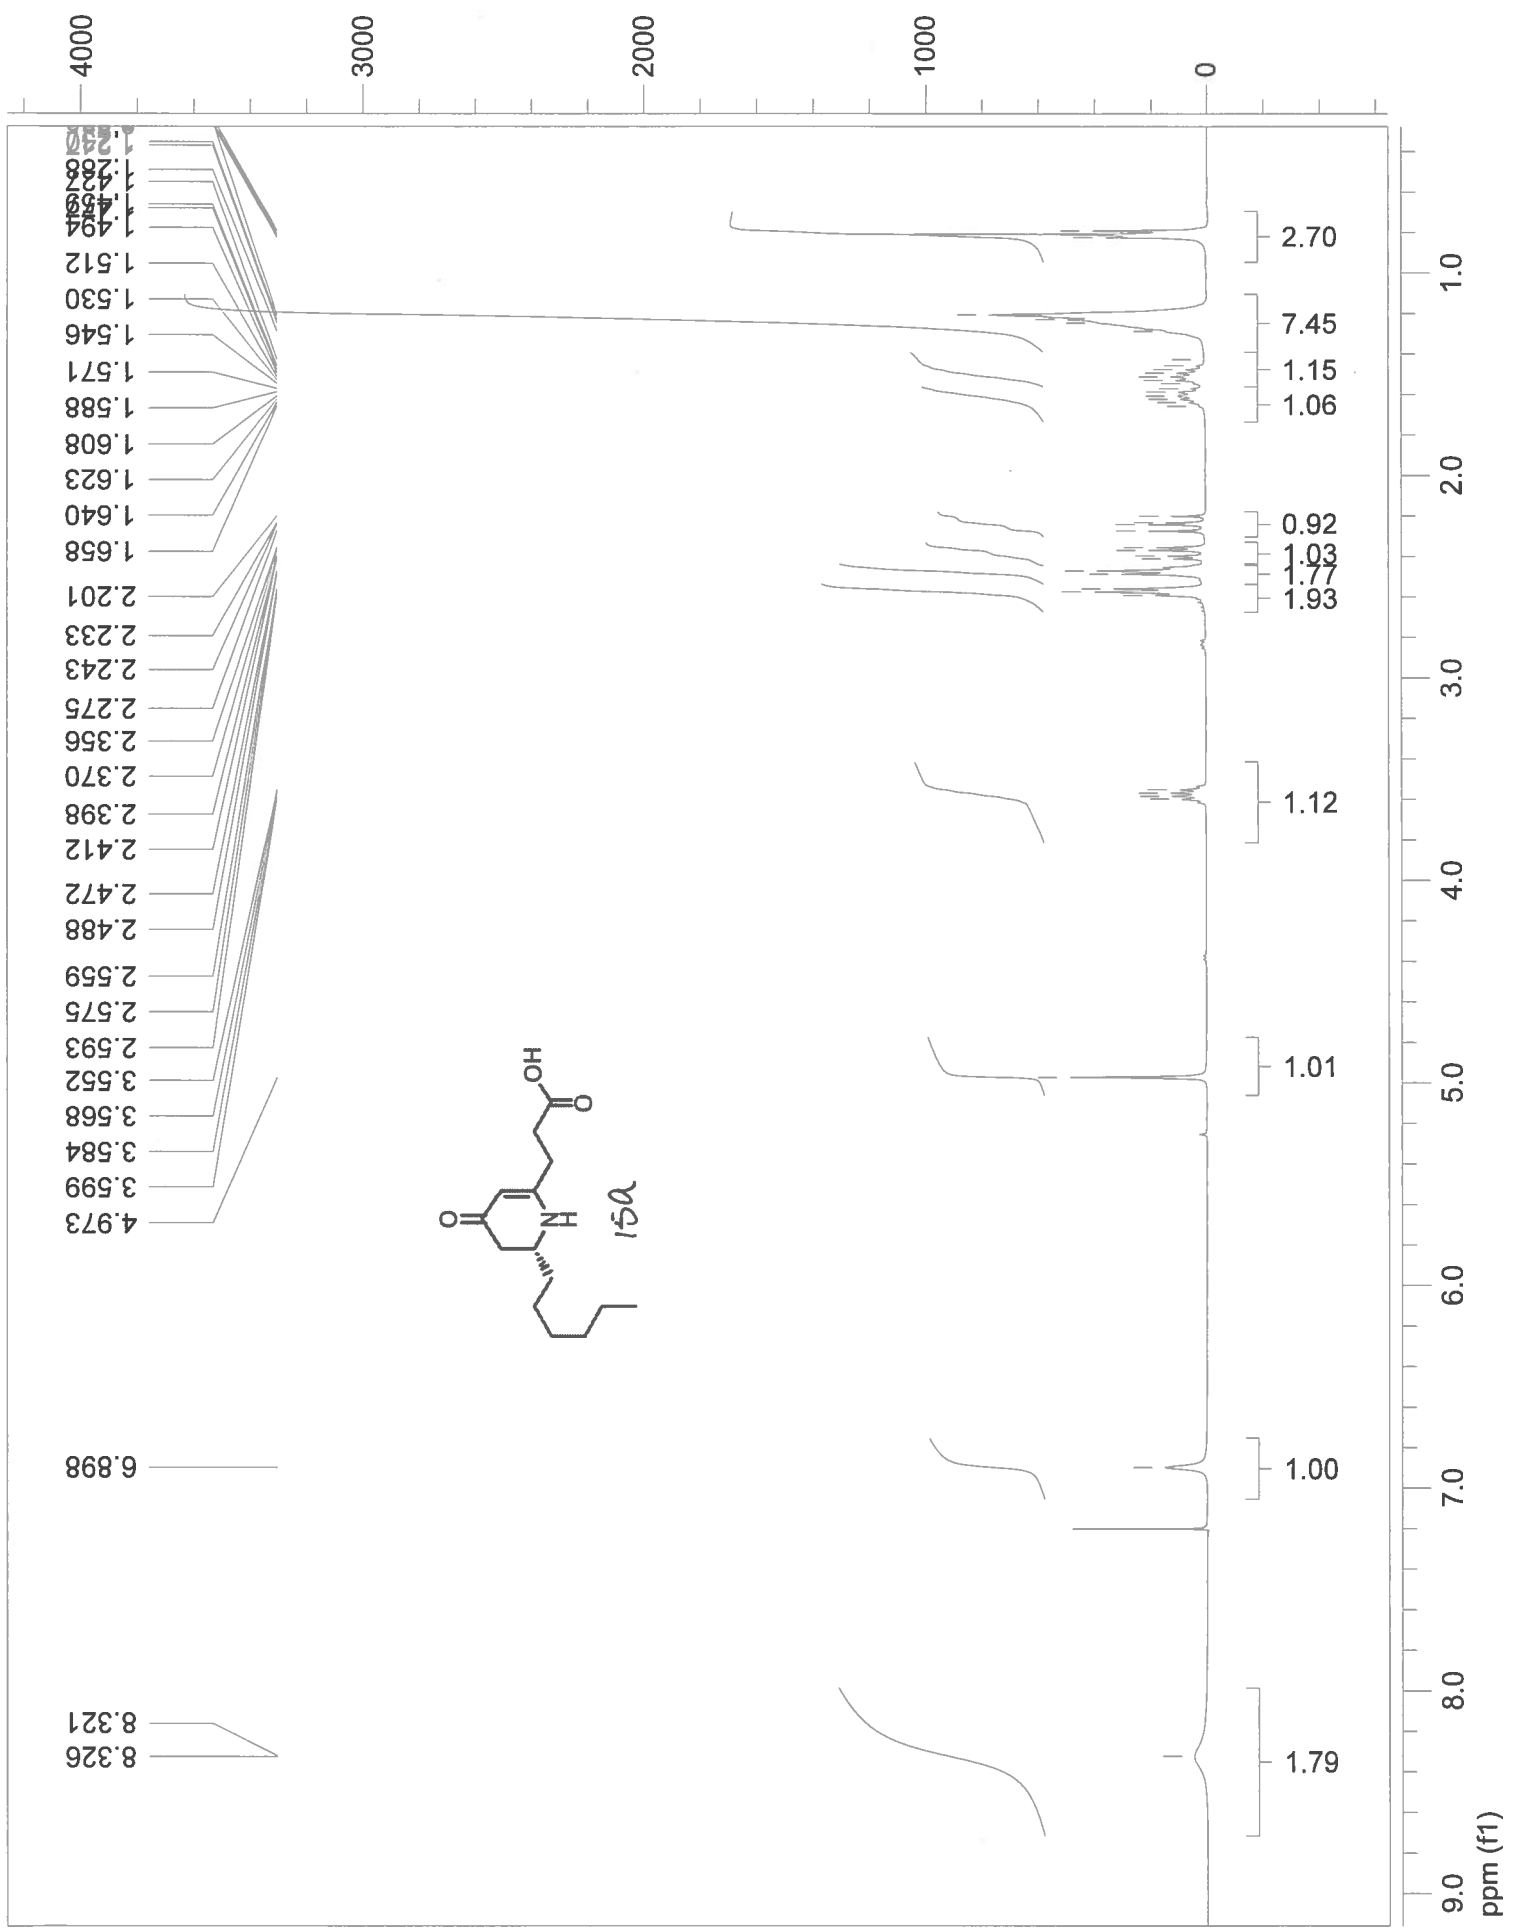



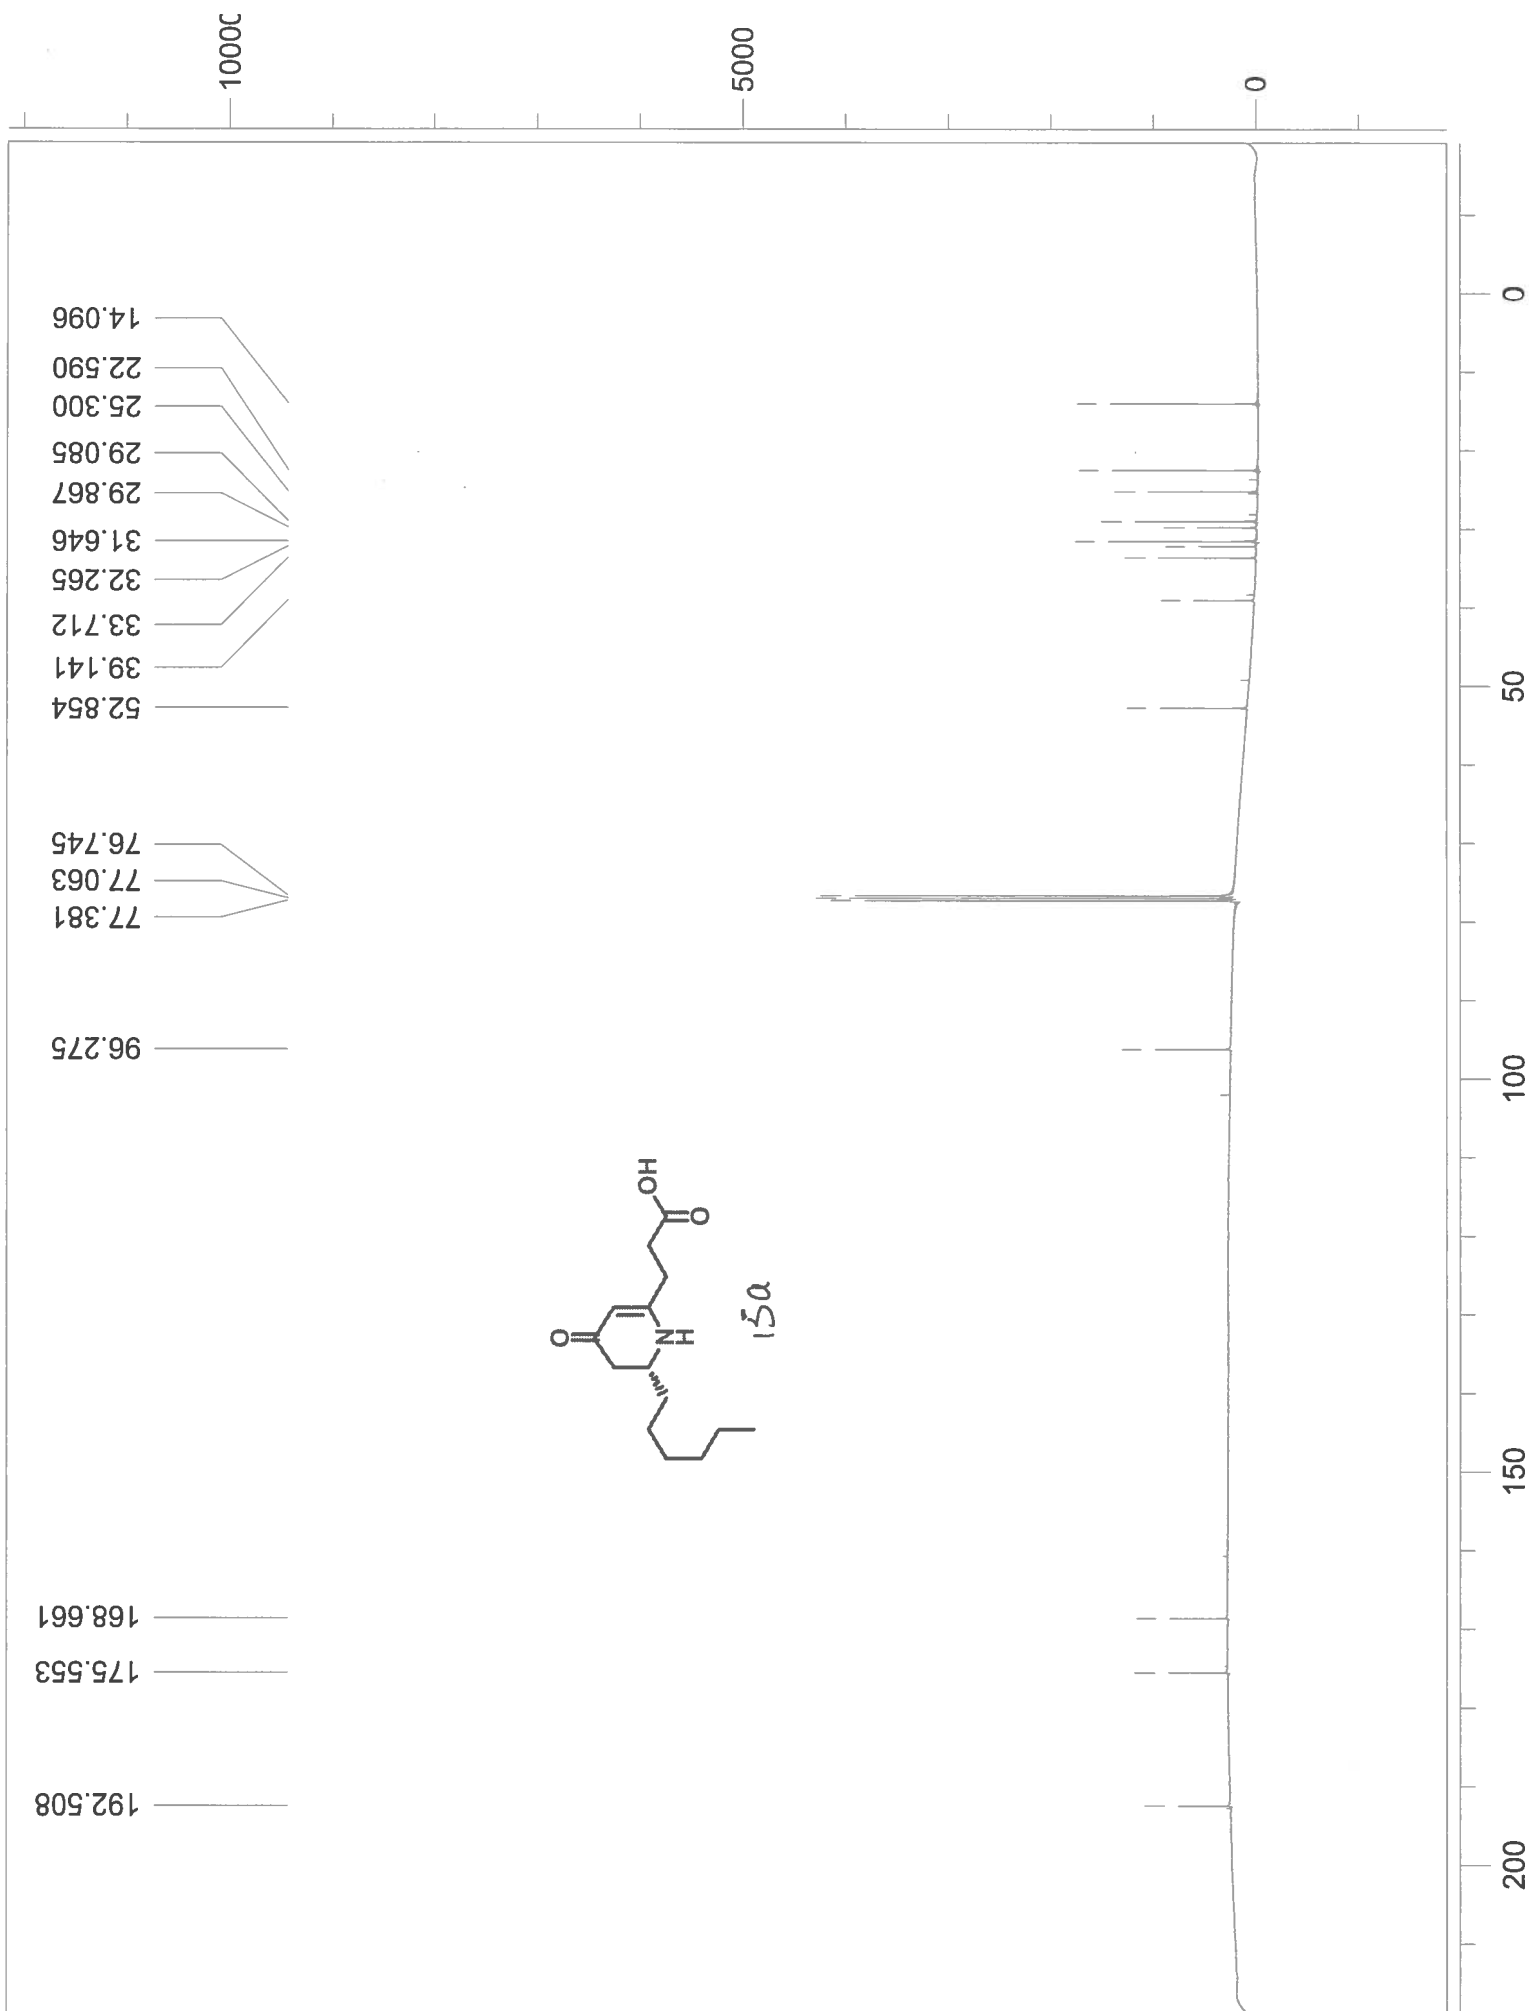

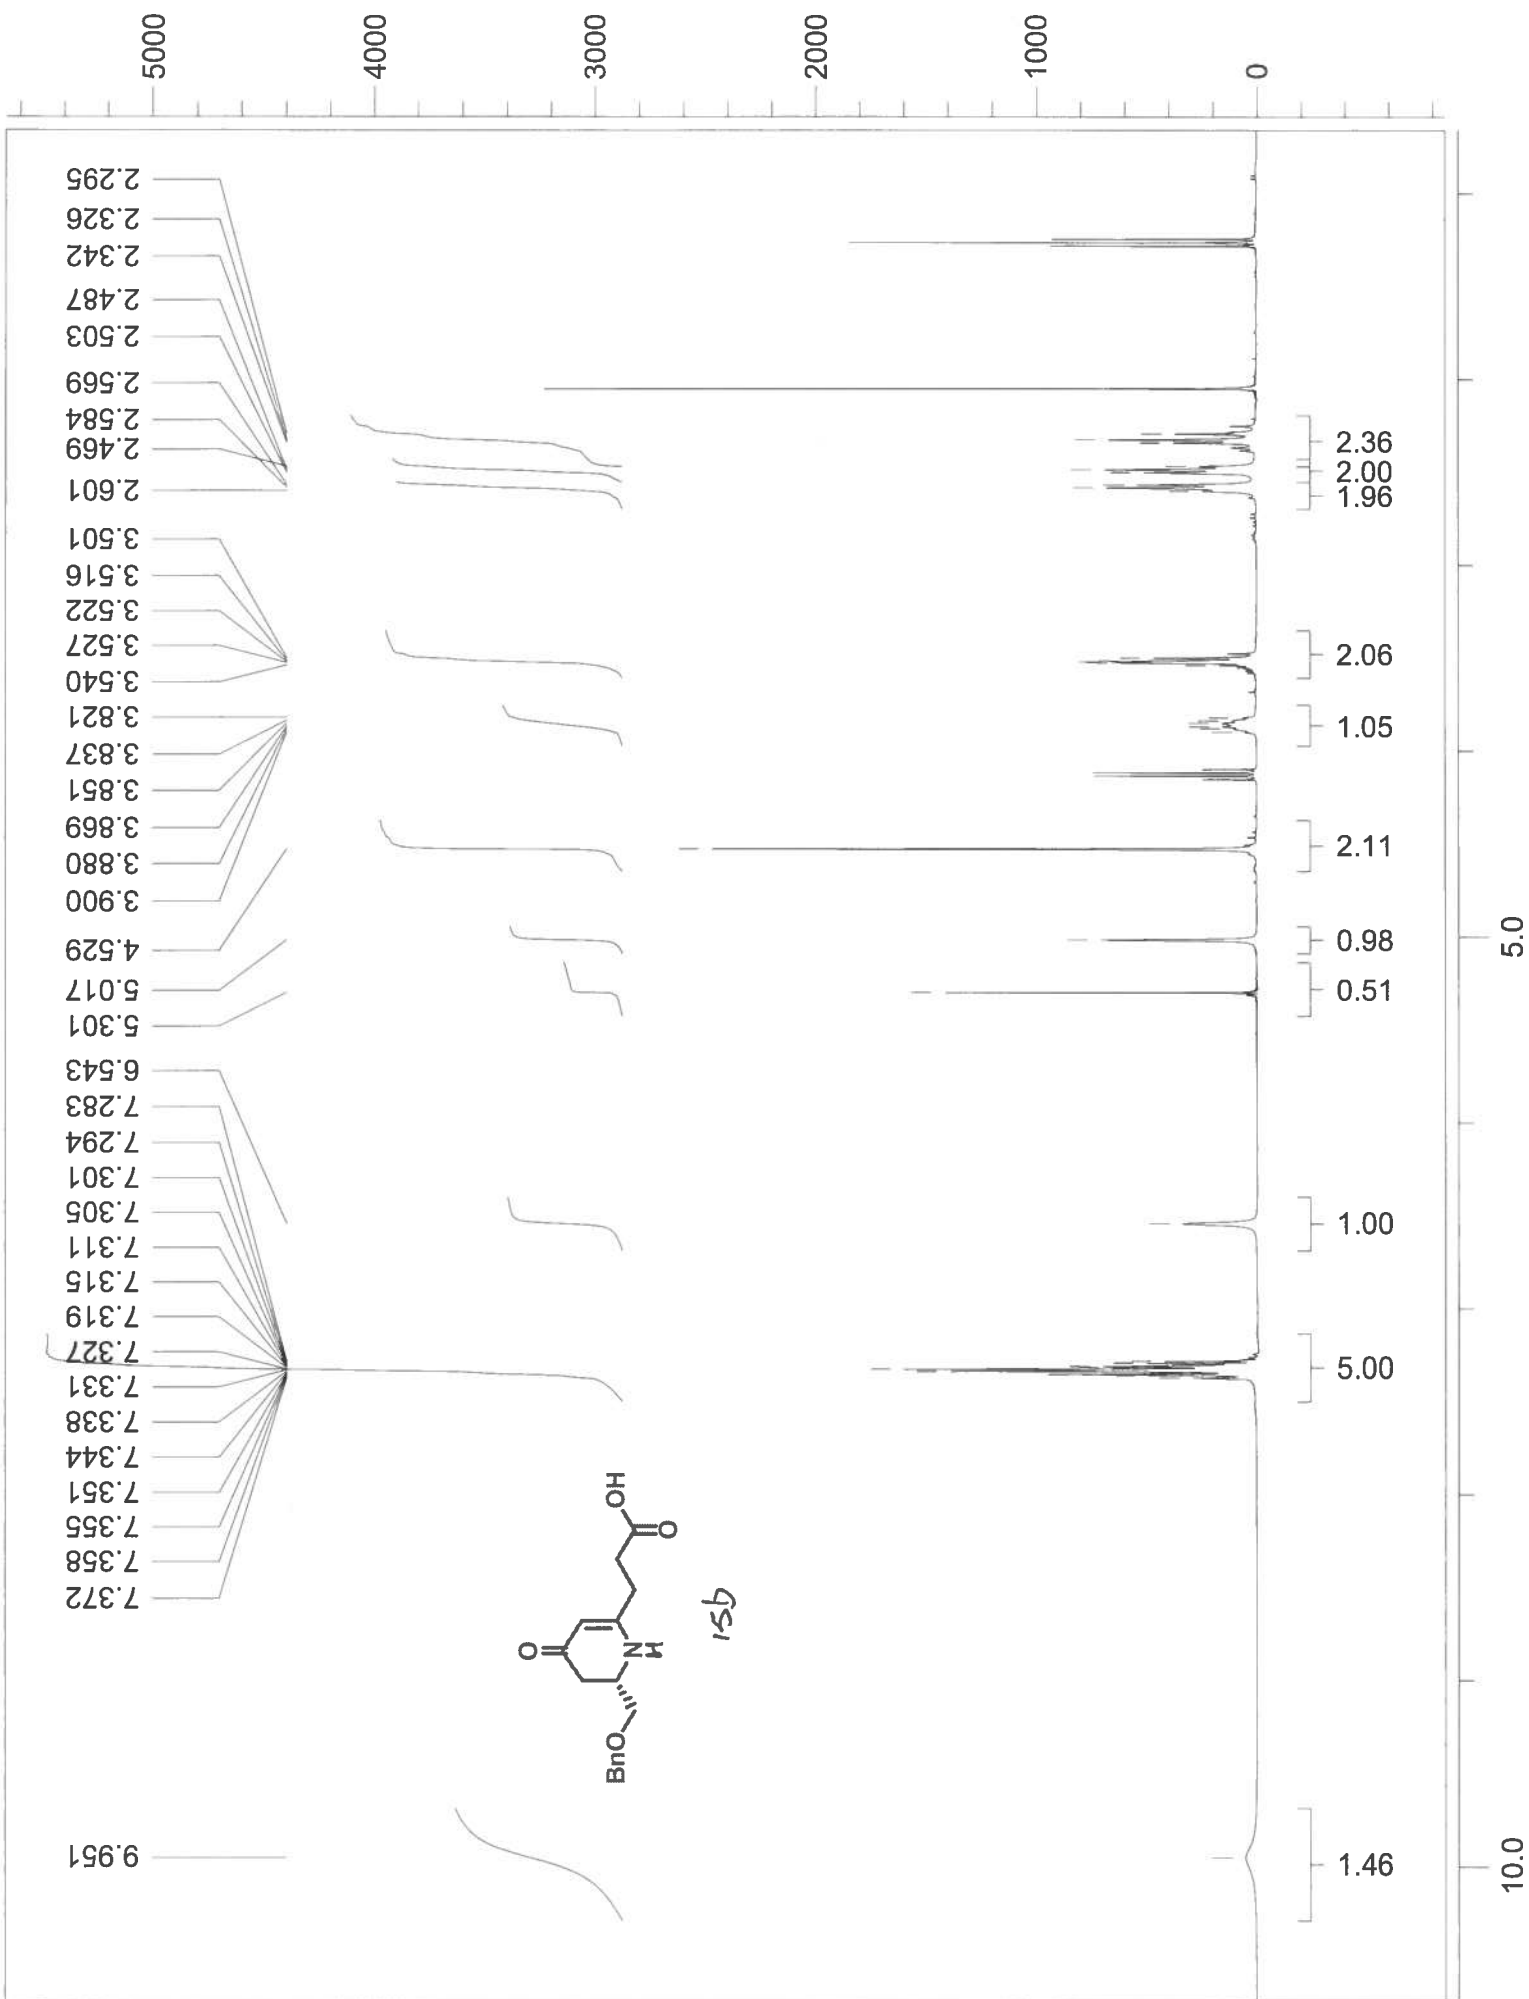

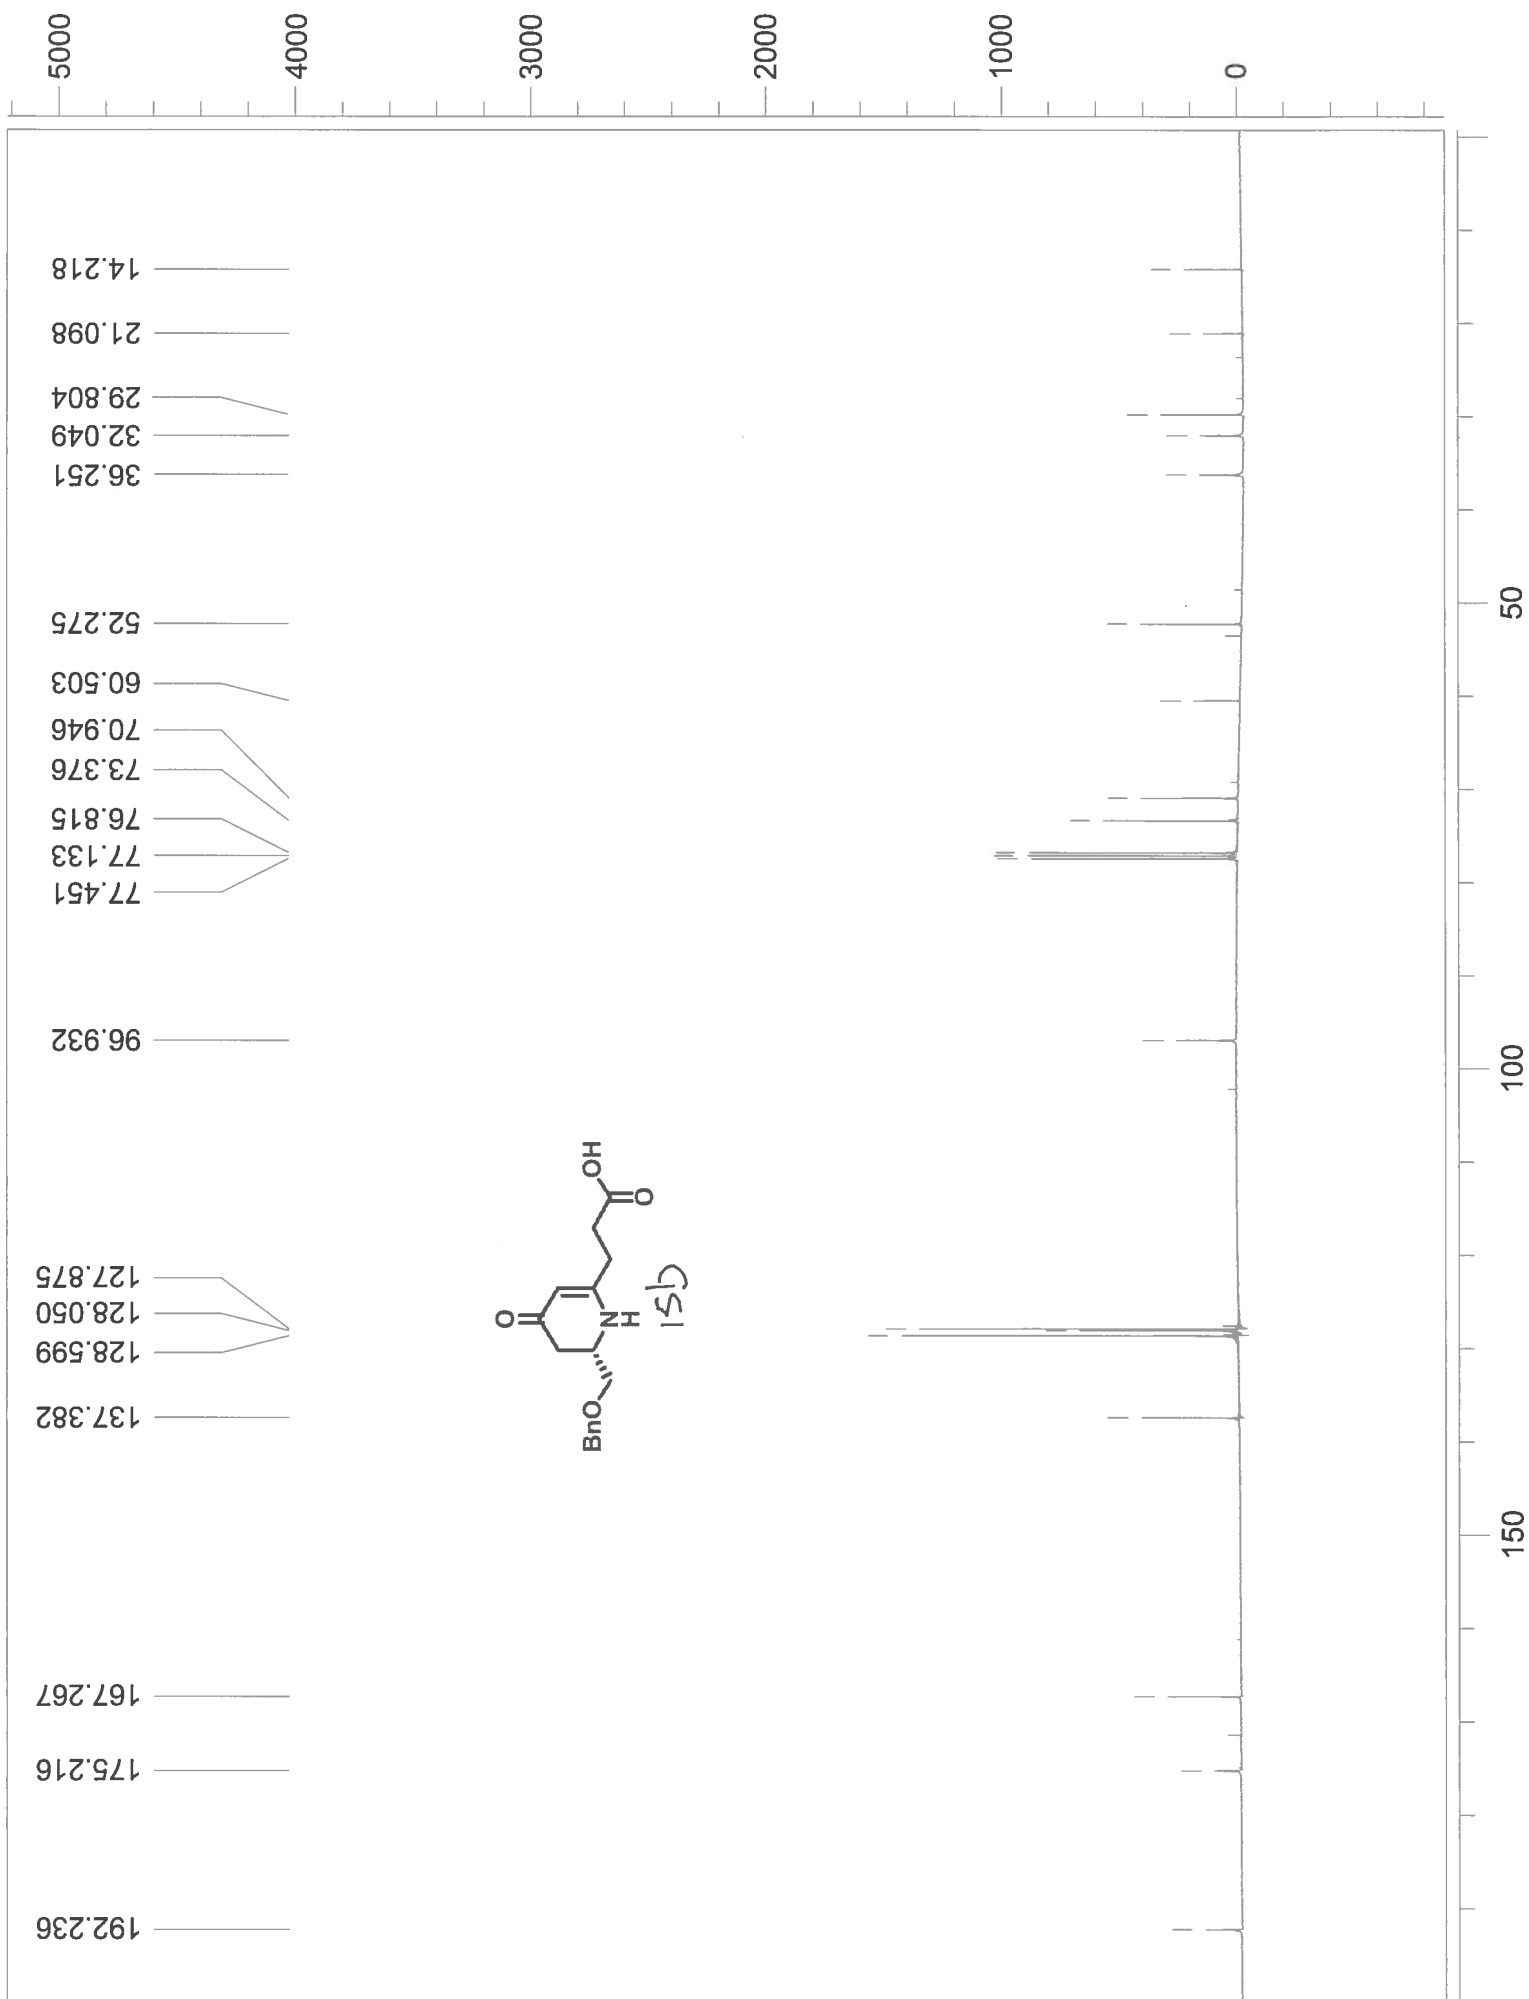

1000C

5000

0

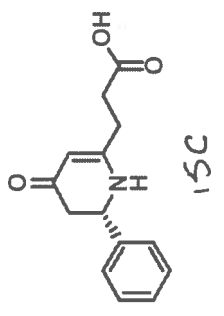

0.94  
2.88  
1.25

8.41

1.00

1.01  
3.67

3.0

4.0

5.0

6.0

7.0

ppm (f1)

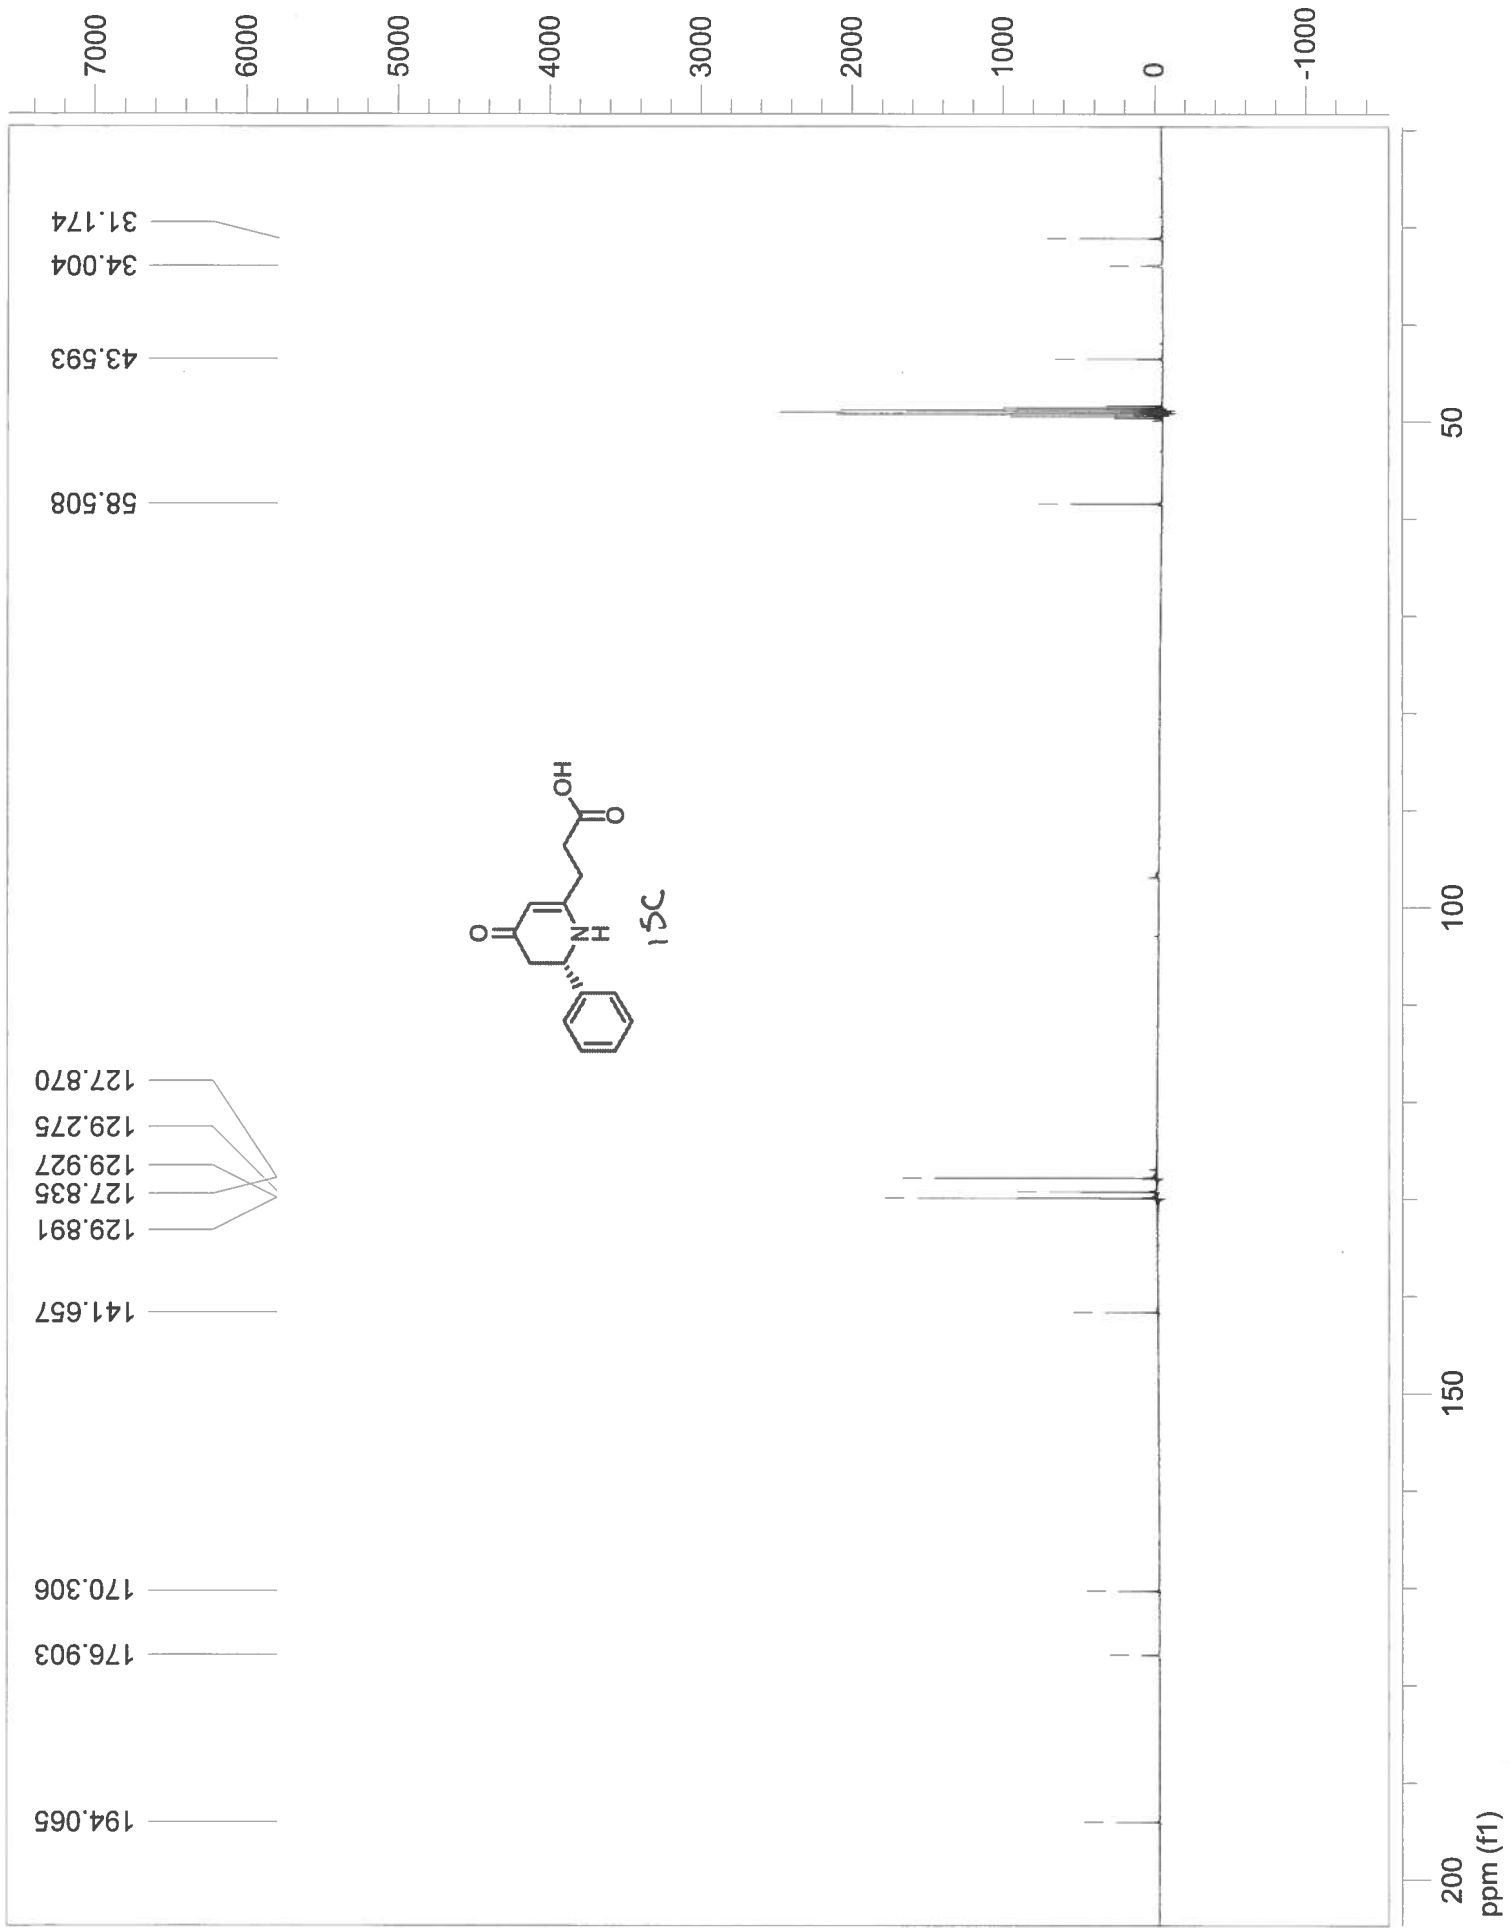

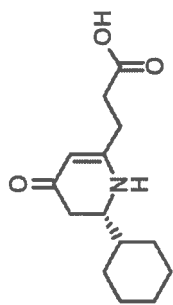

15d

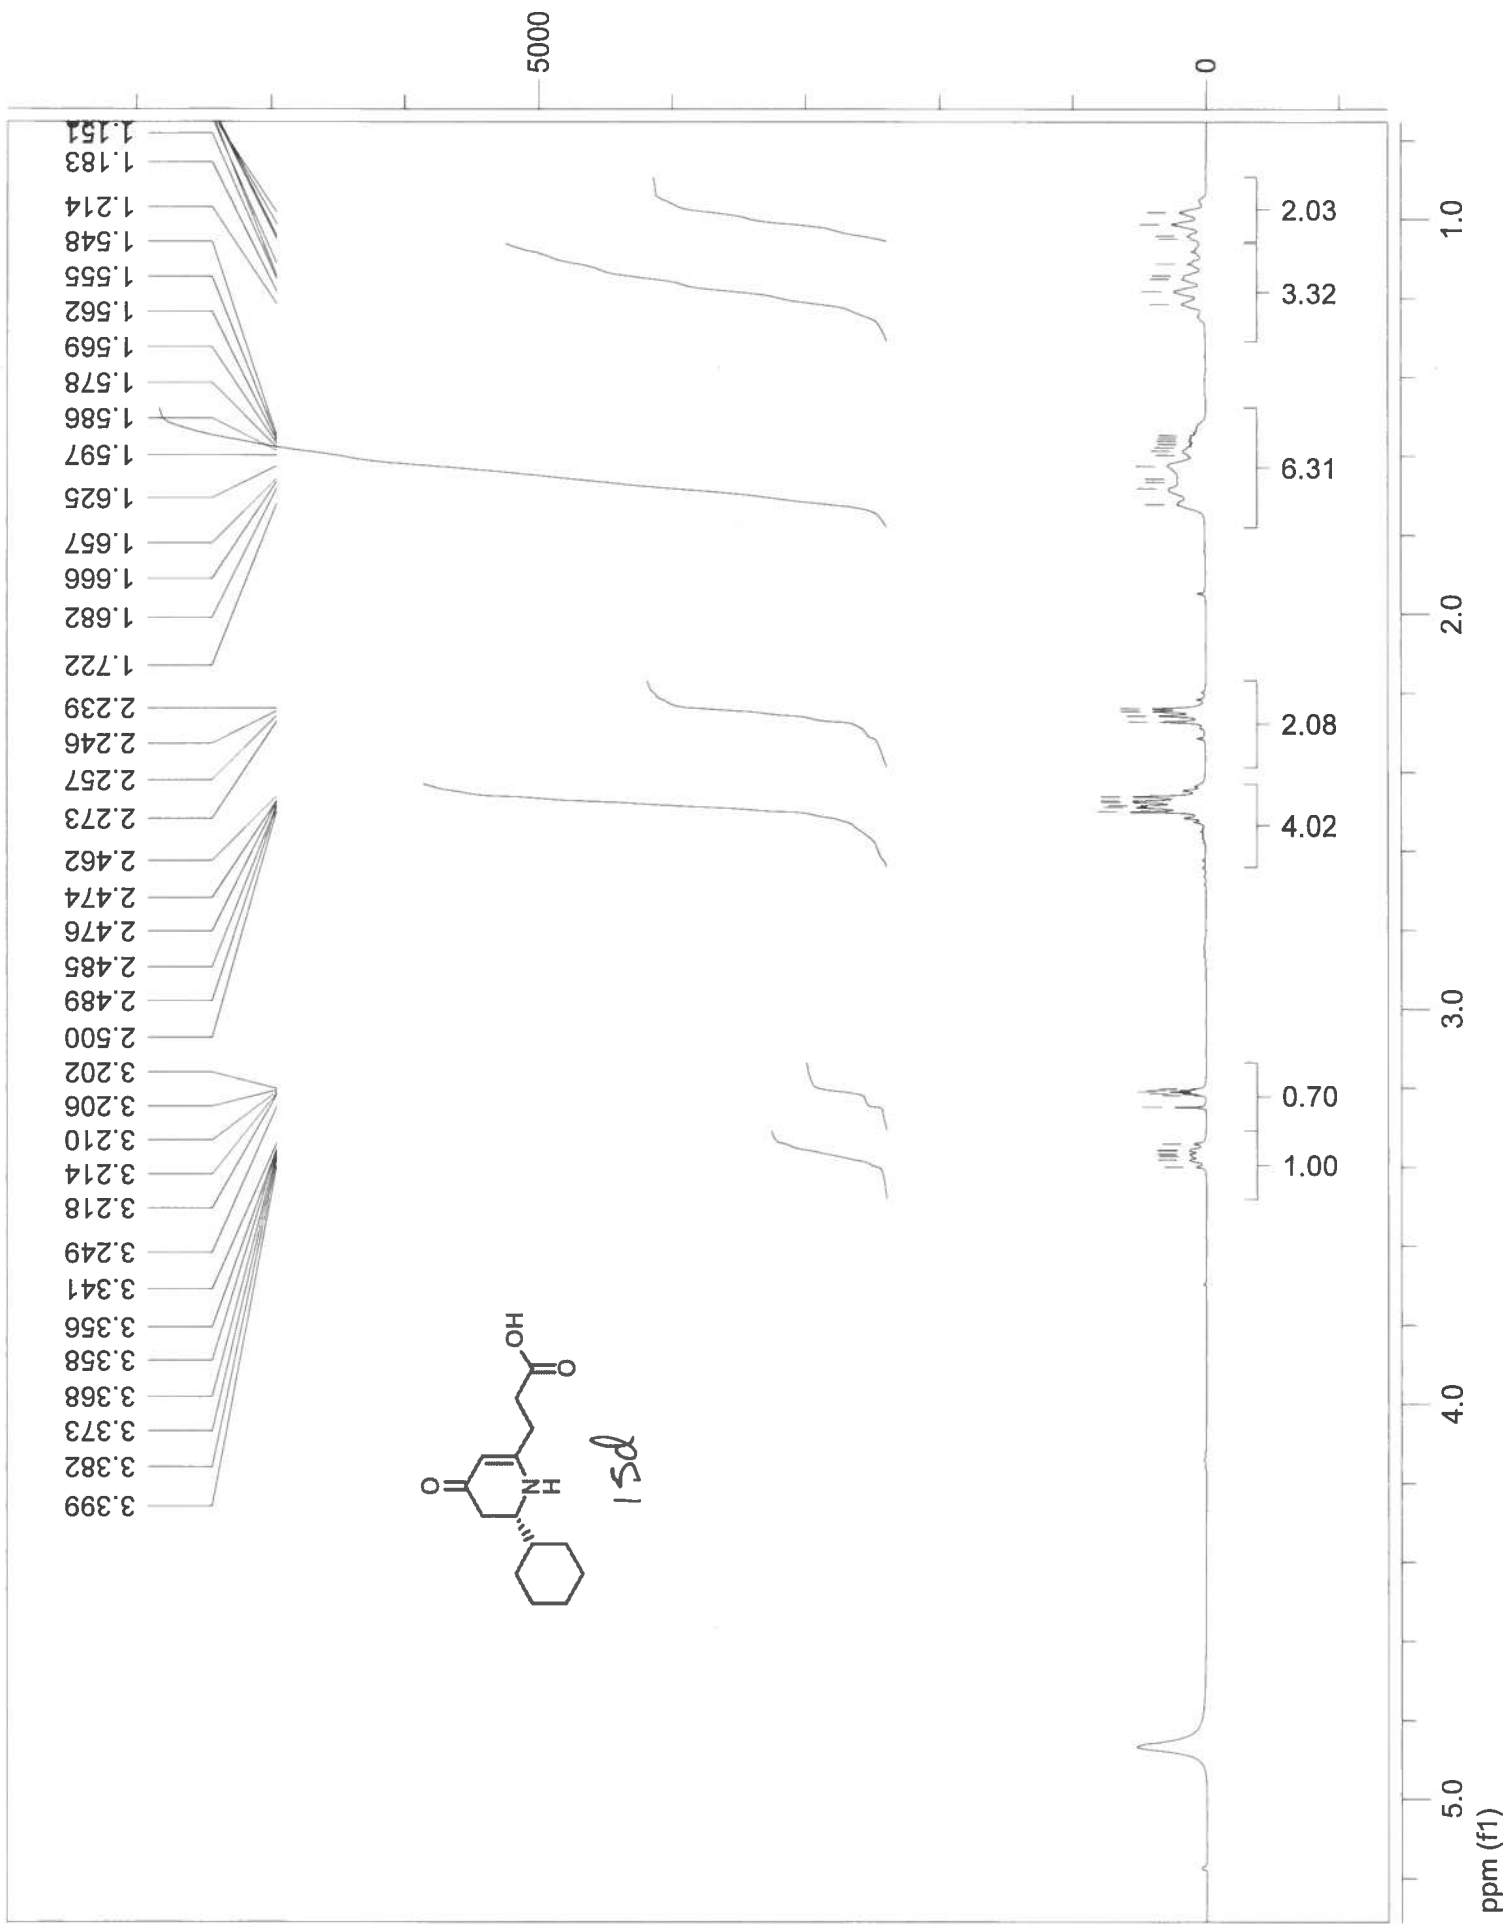

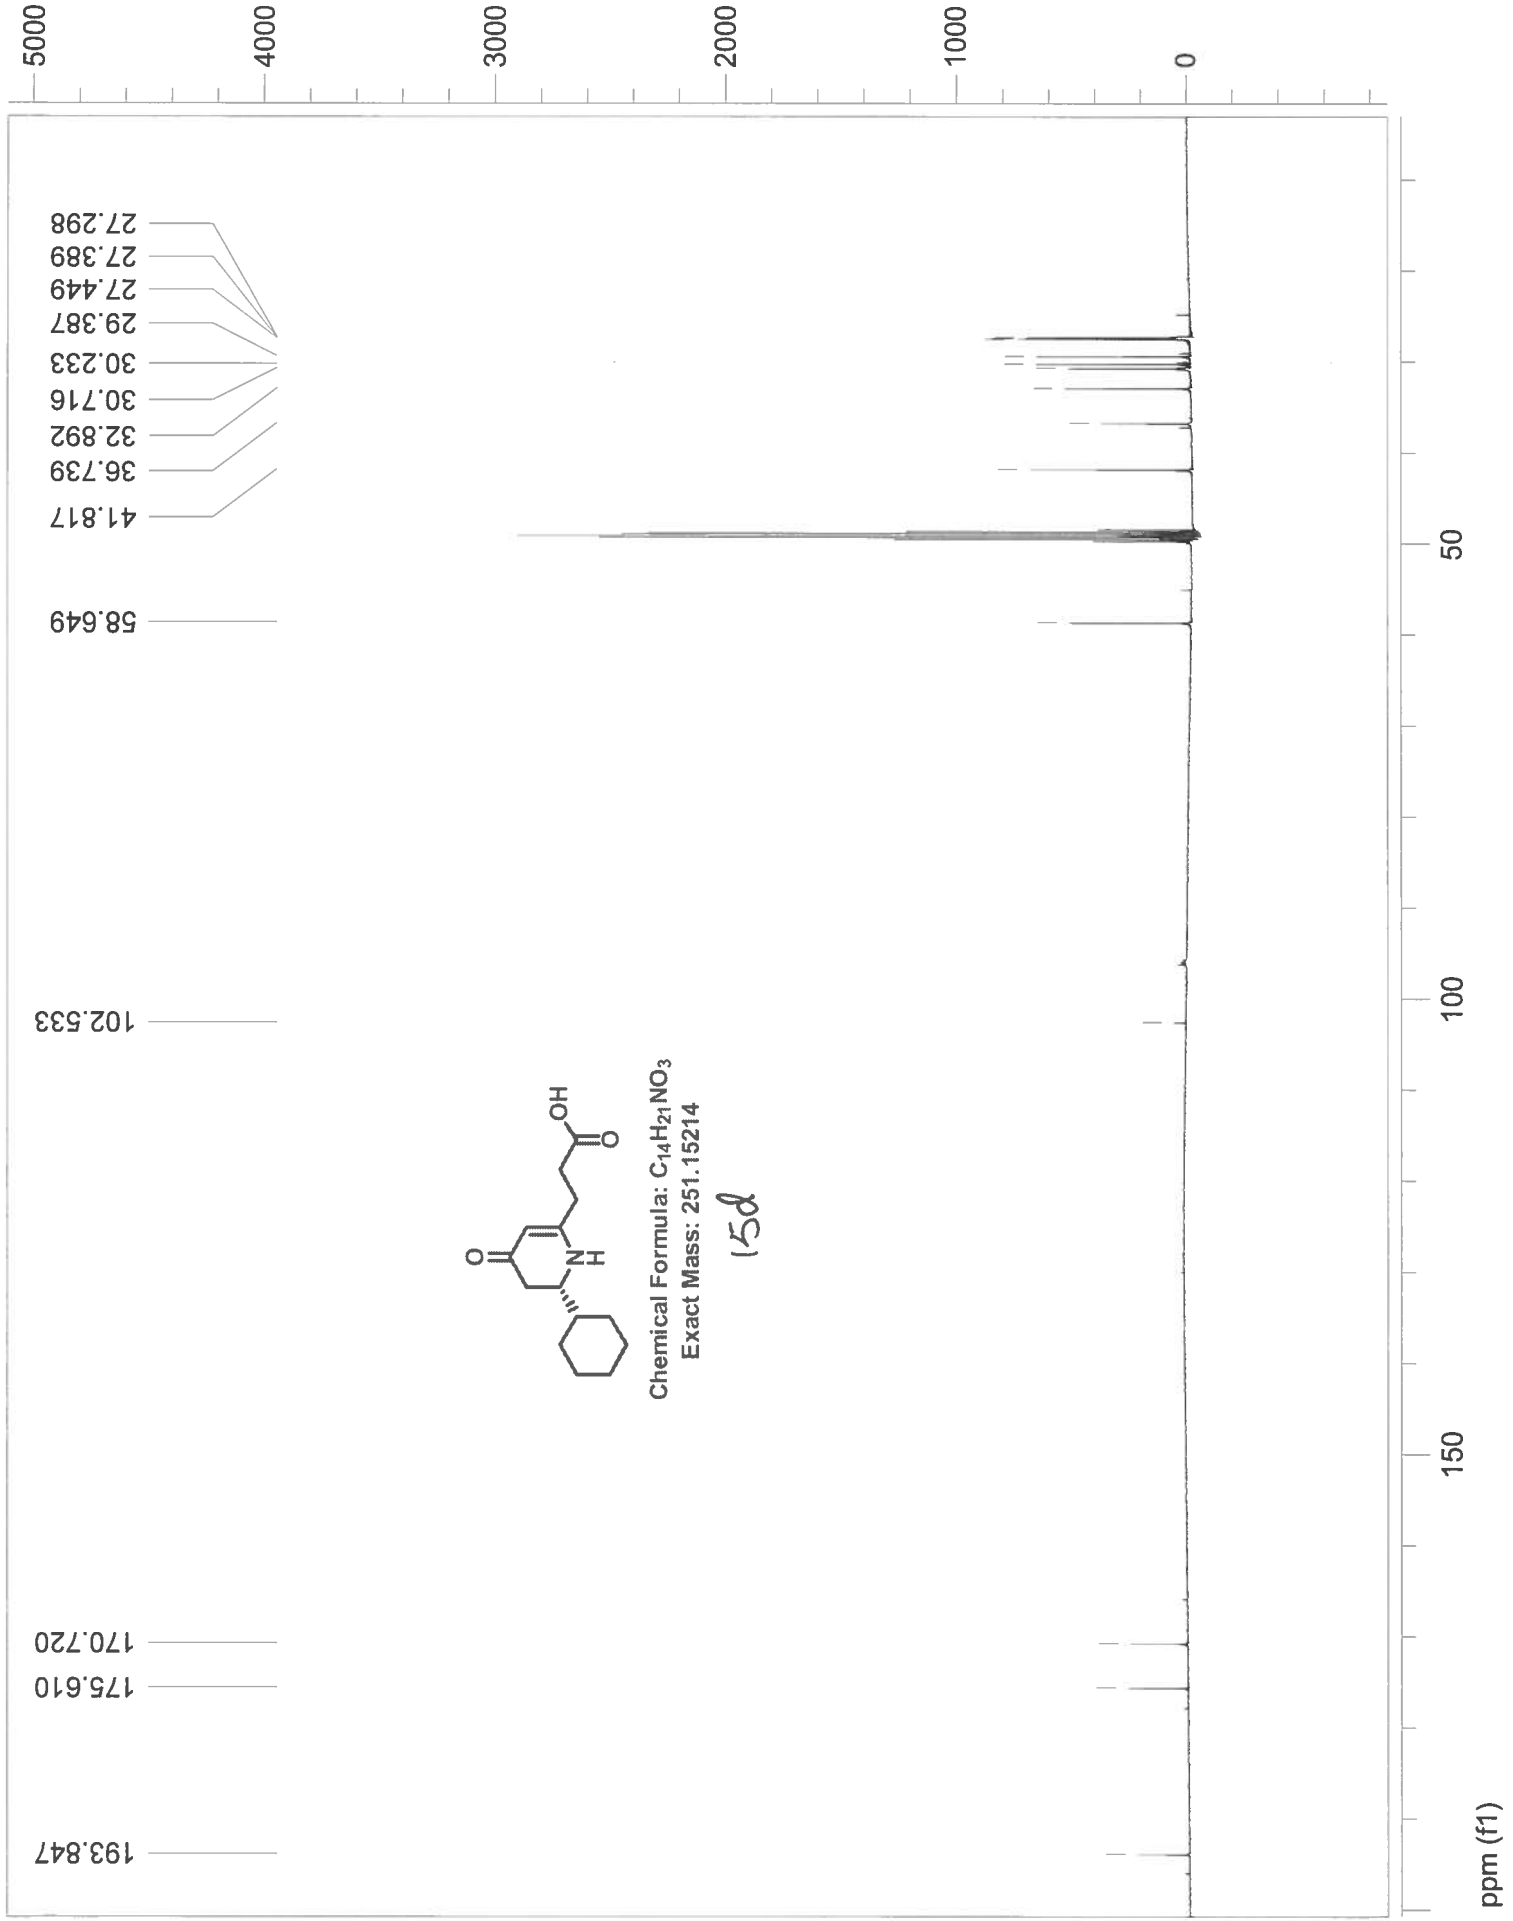

Waktu: 18.13.00  
PROTON 1D CDCl<sub>3</sub> C: WIRIDATAY Yang 8

Handwritten notes: "H" and "H" with arrows pointing to the chemical structure.

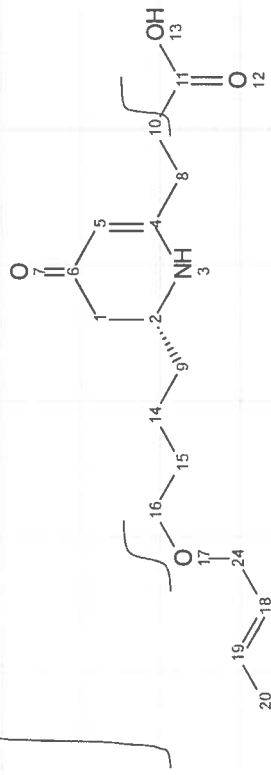

152

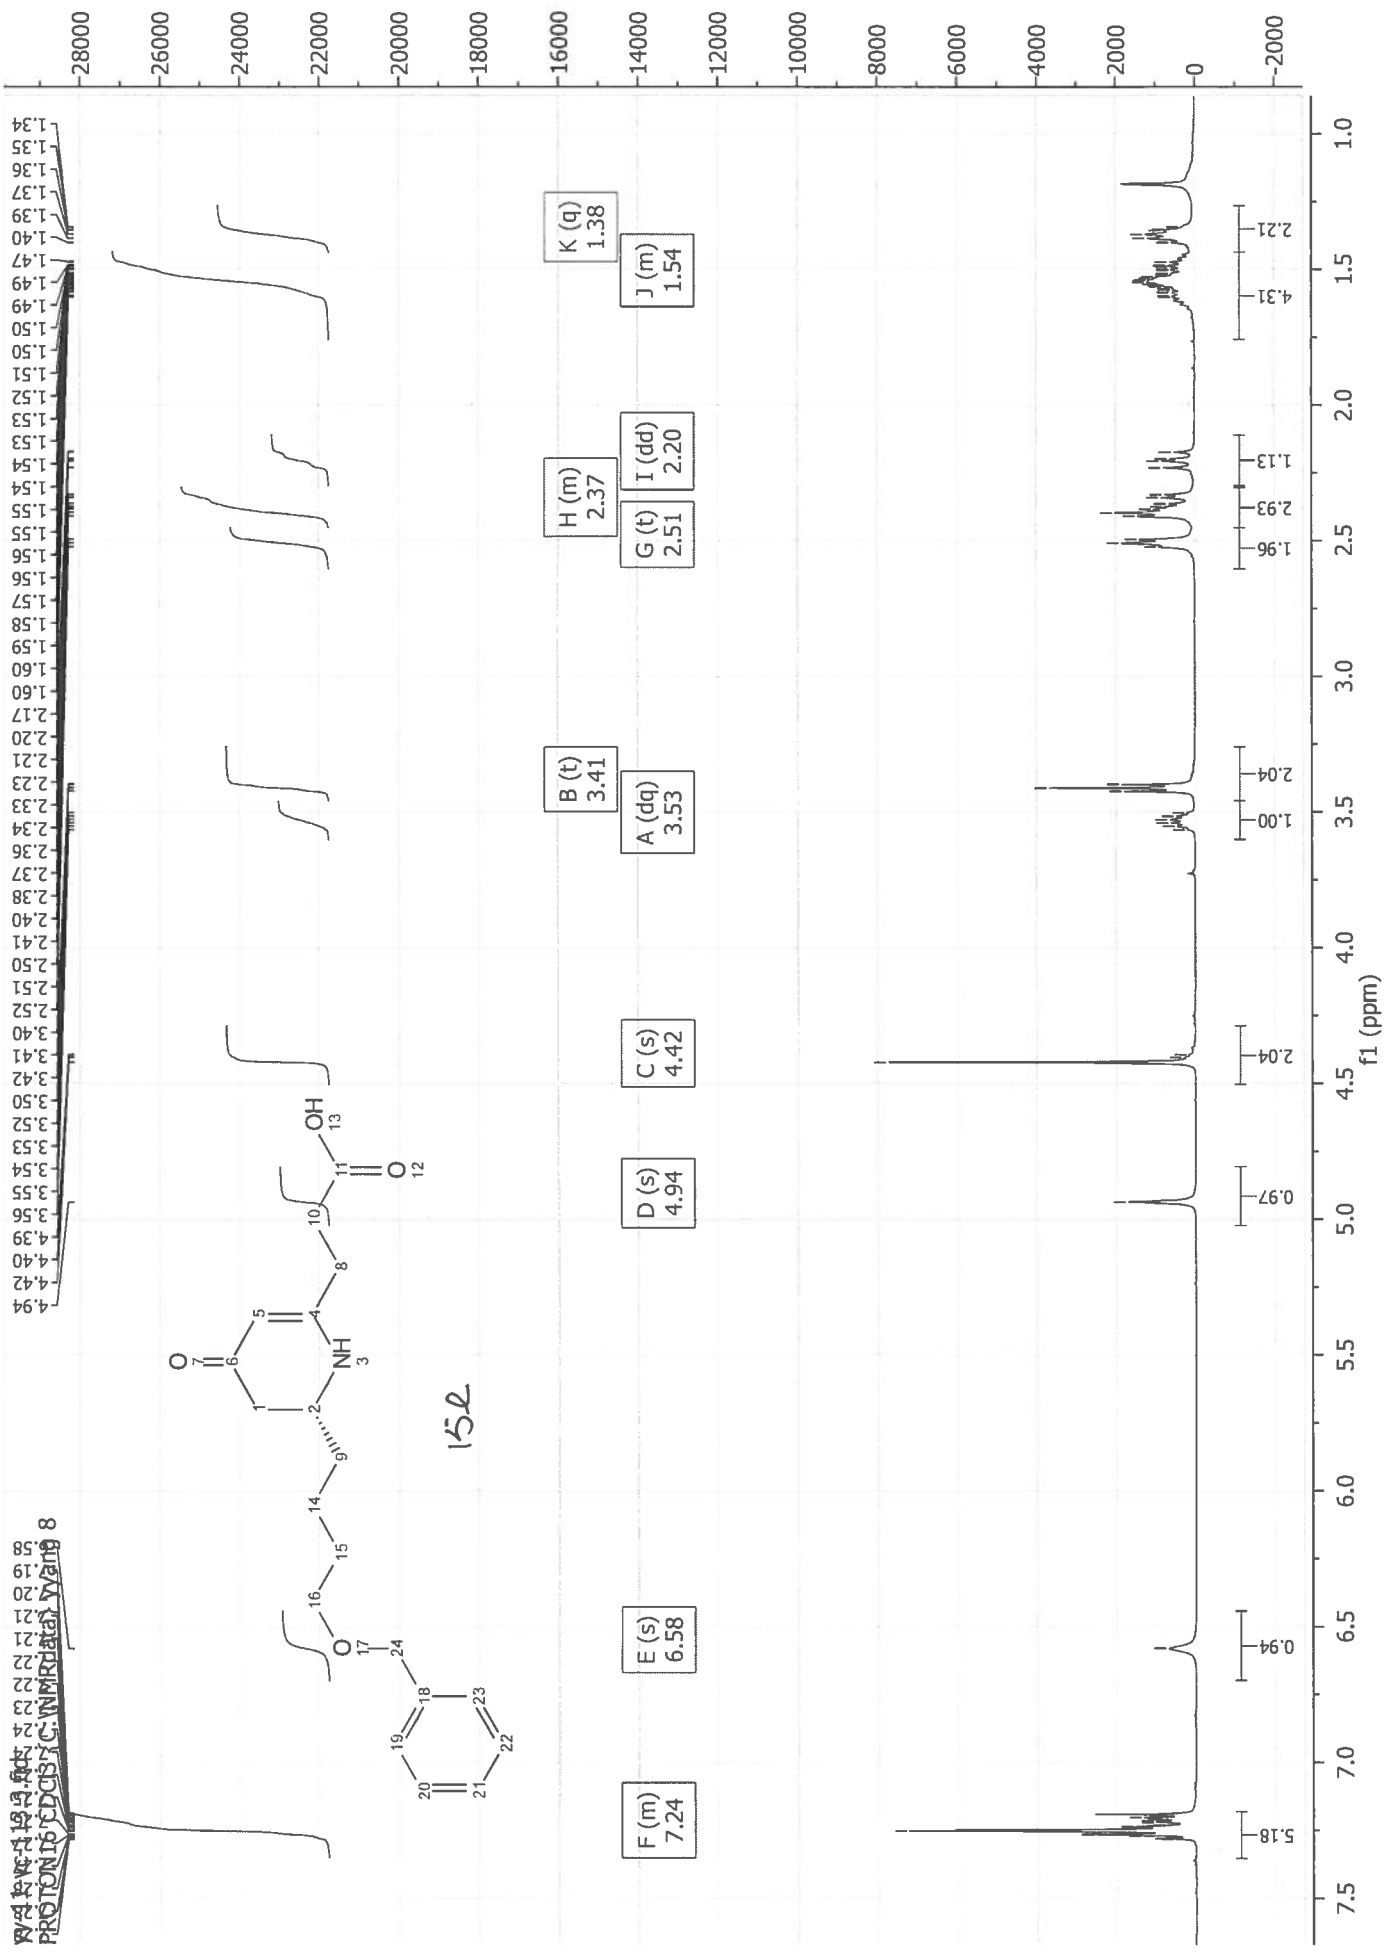



W-81-vc-113.4.fid  
C:\S\PD256 CDC13 {C:\NMR\data} \yyang 8

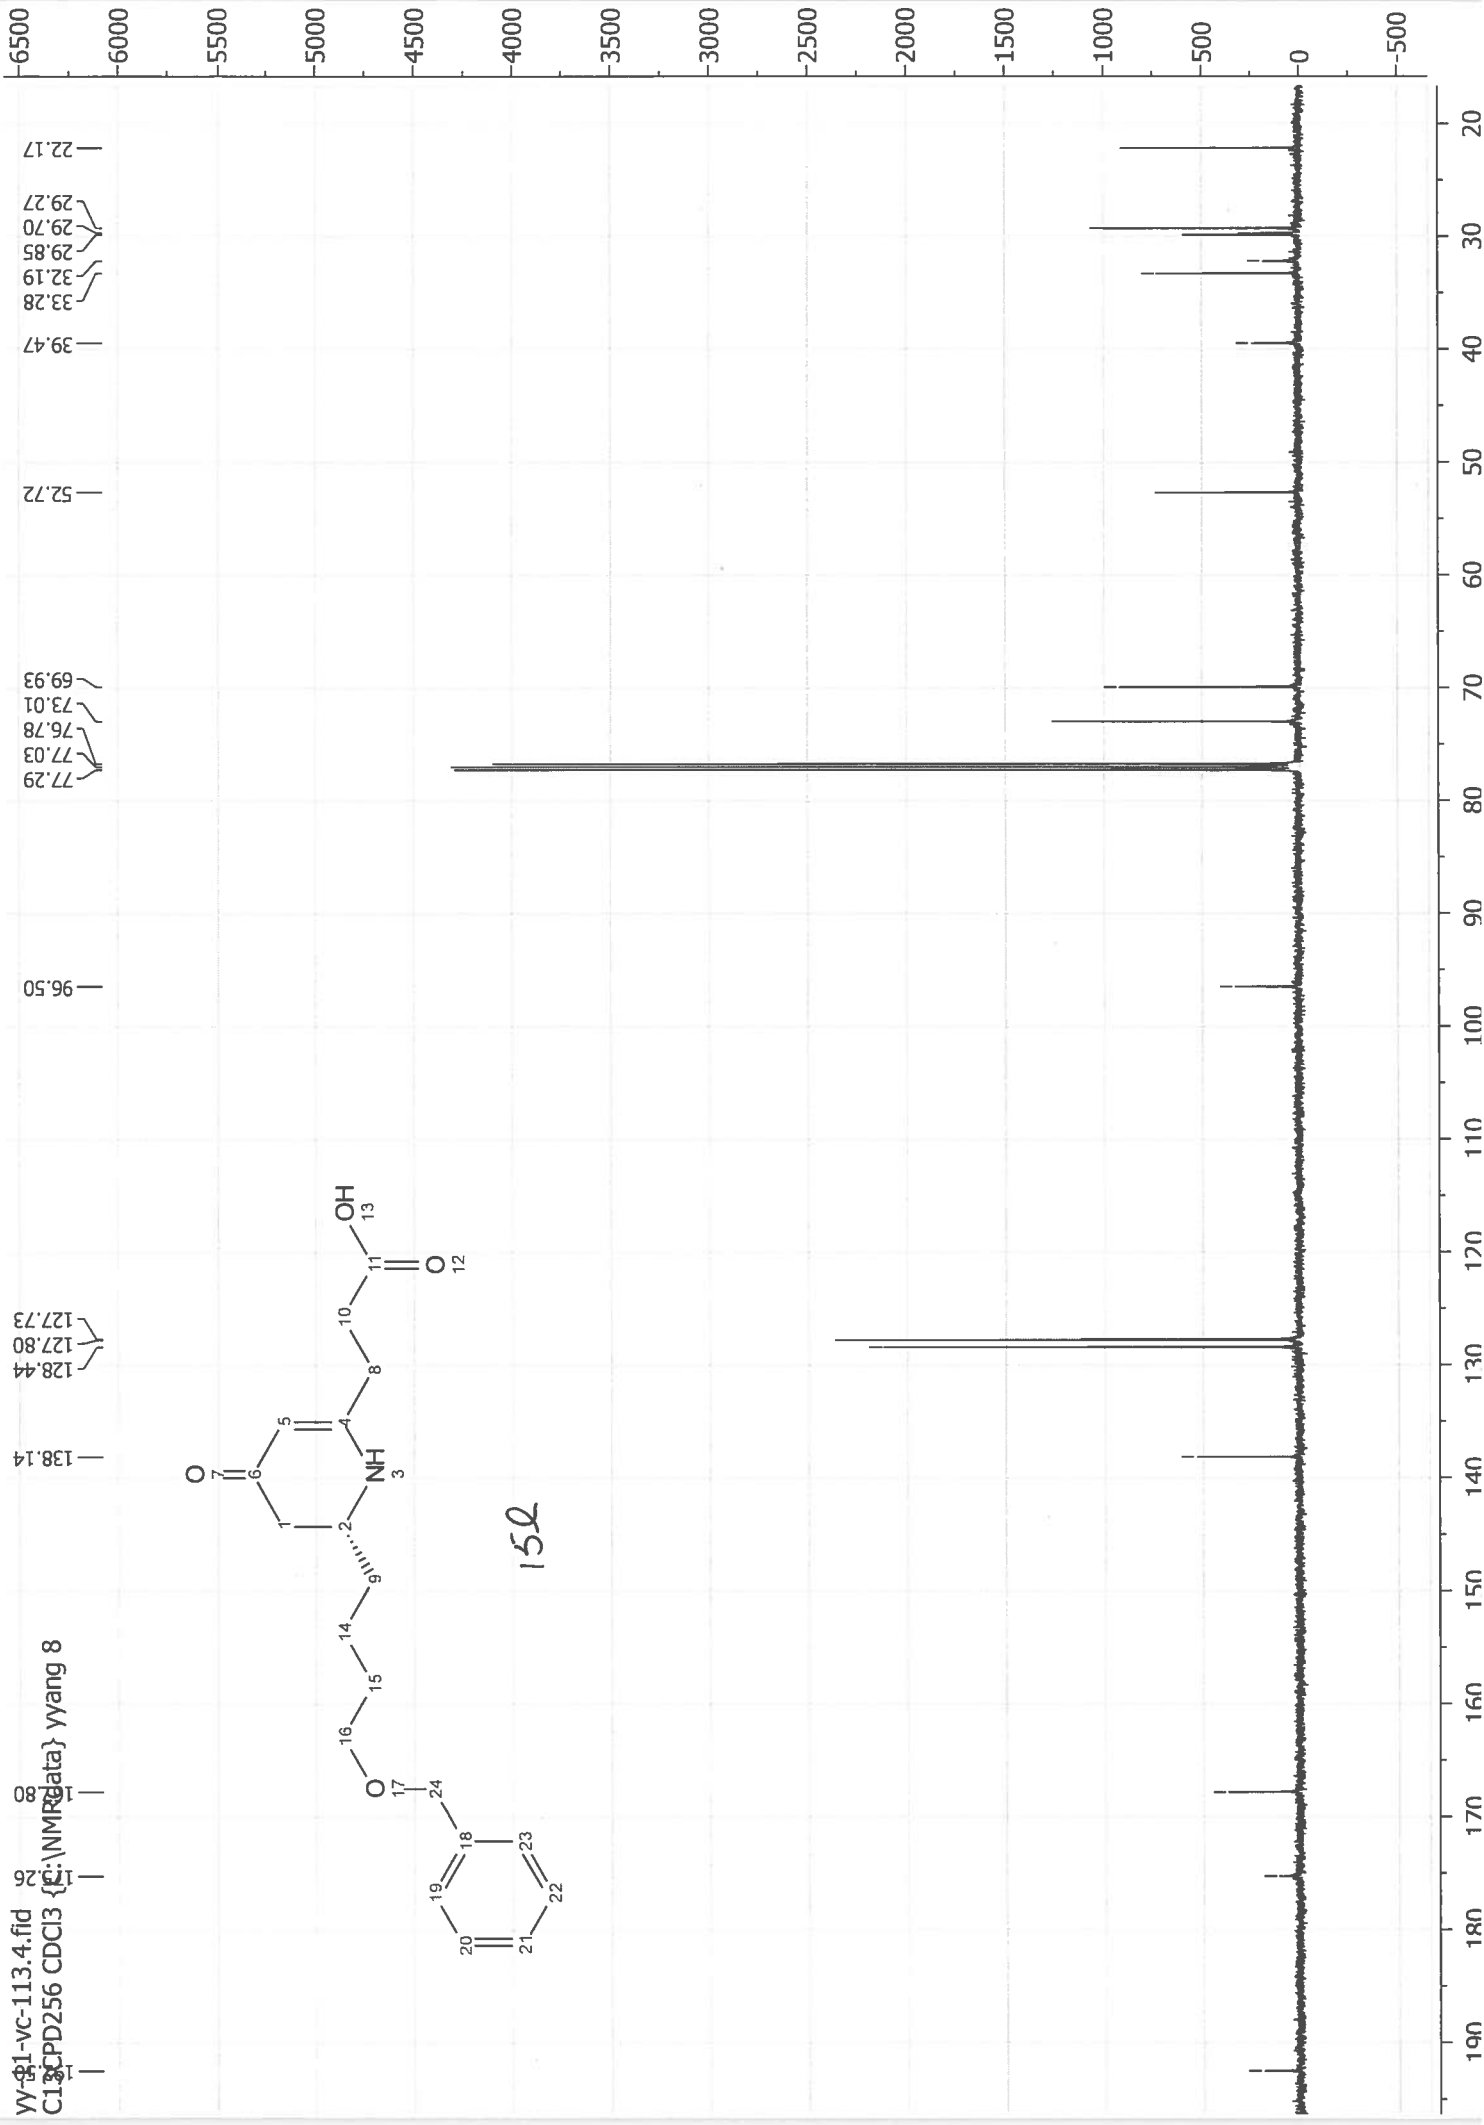

150

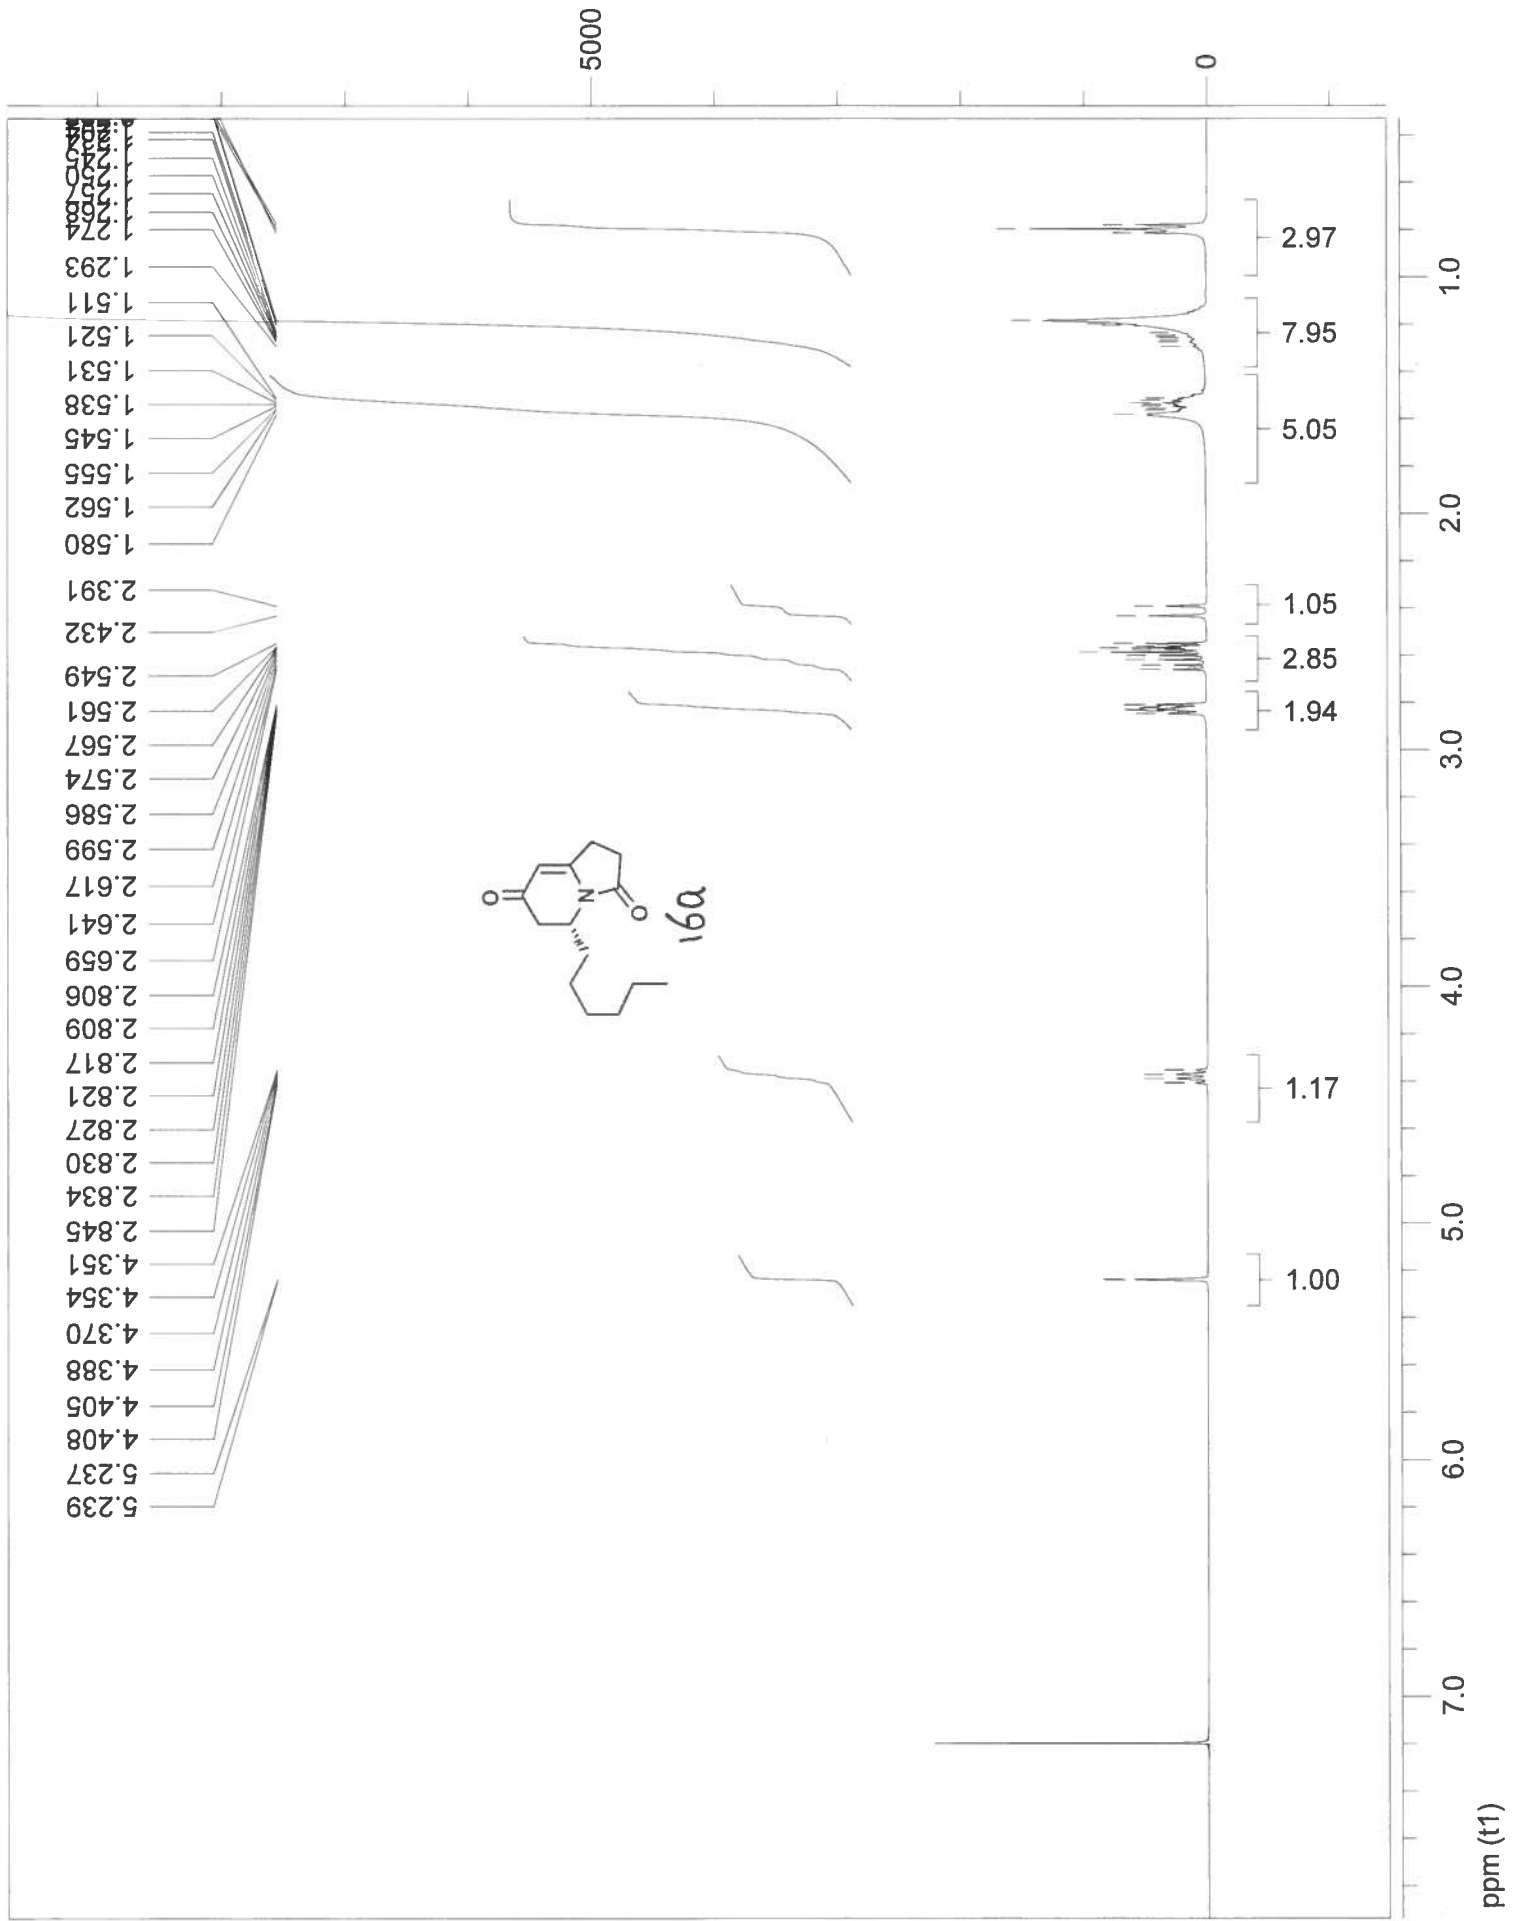

1D — YY-8-VC-14.2.fid —

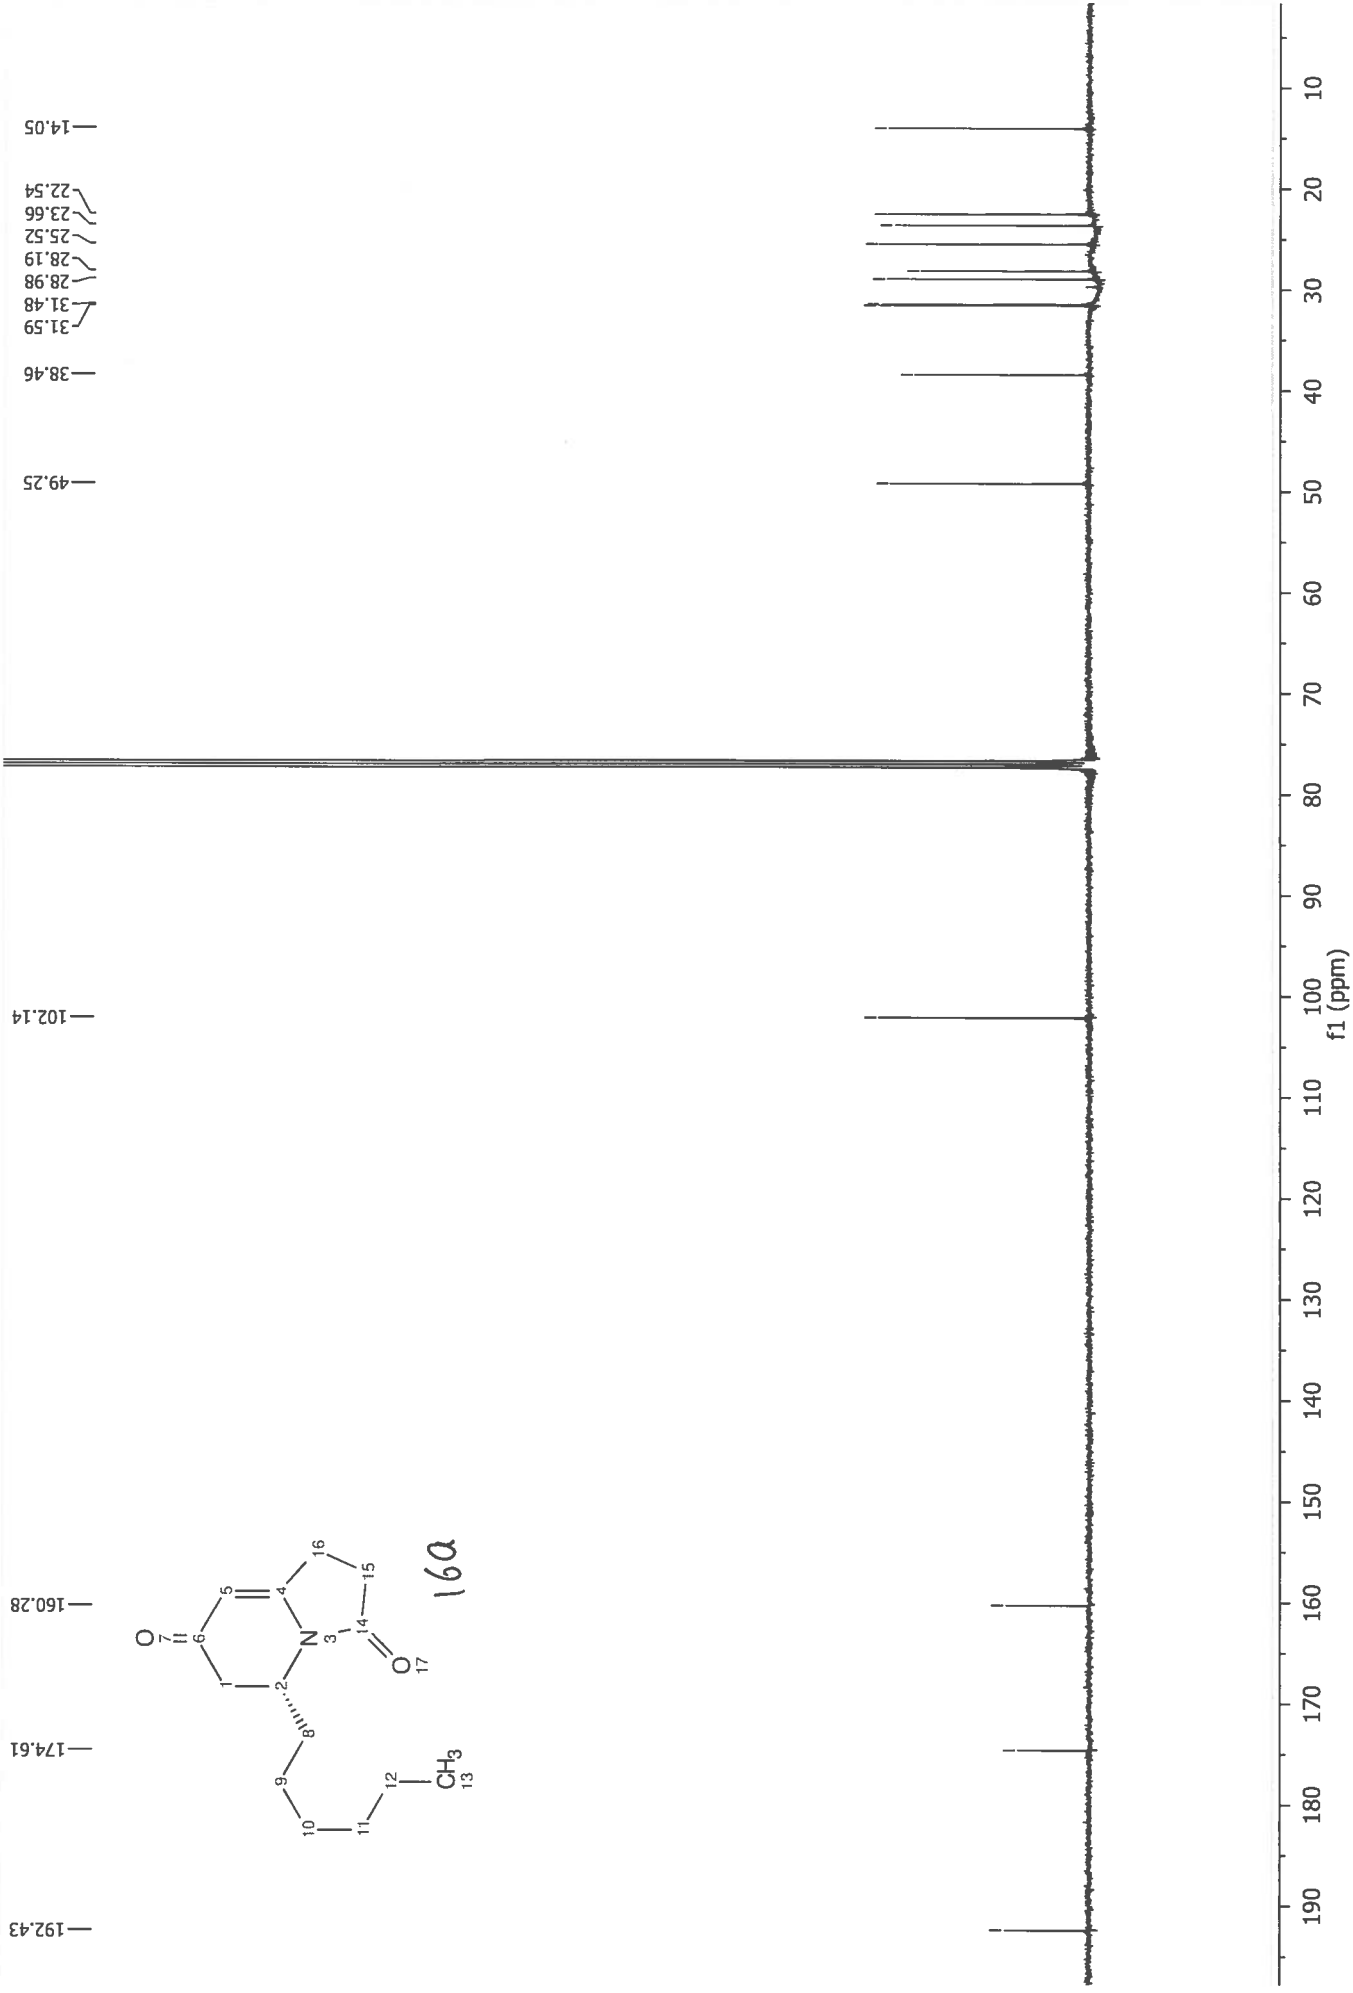

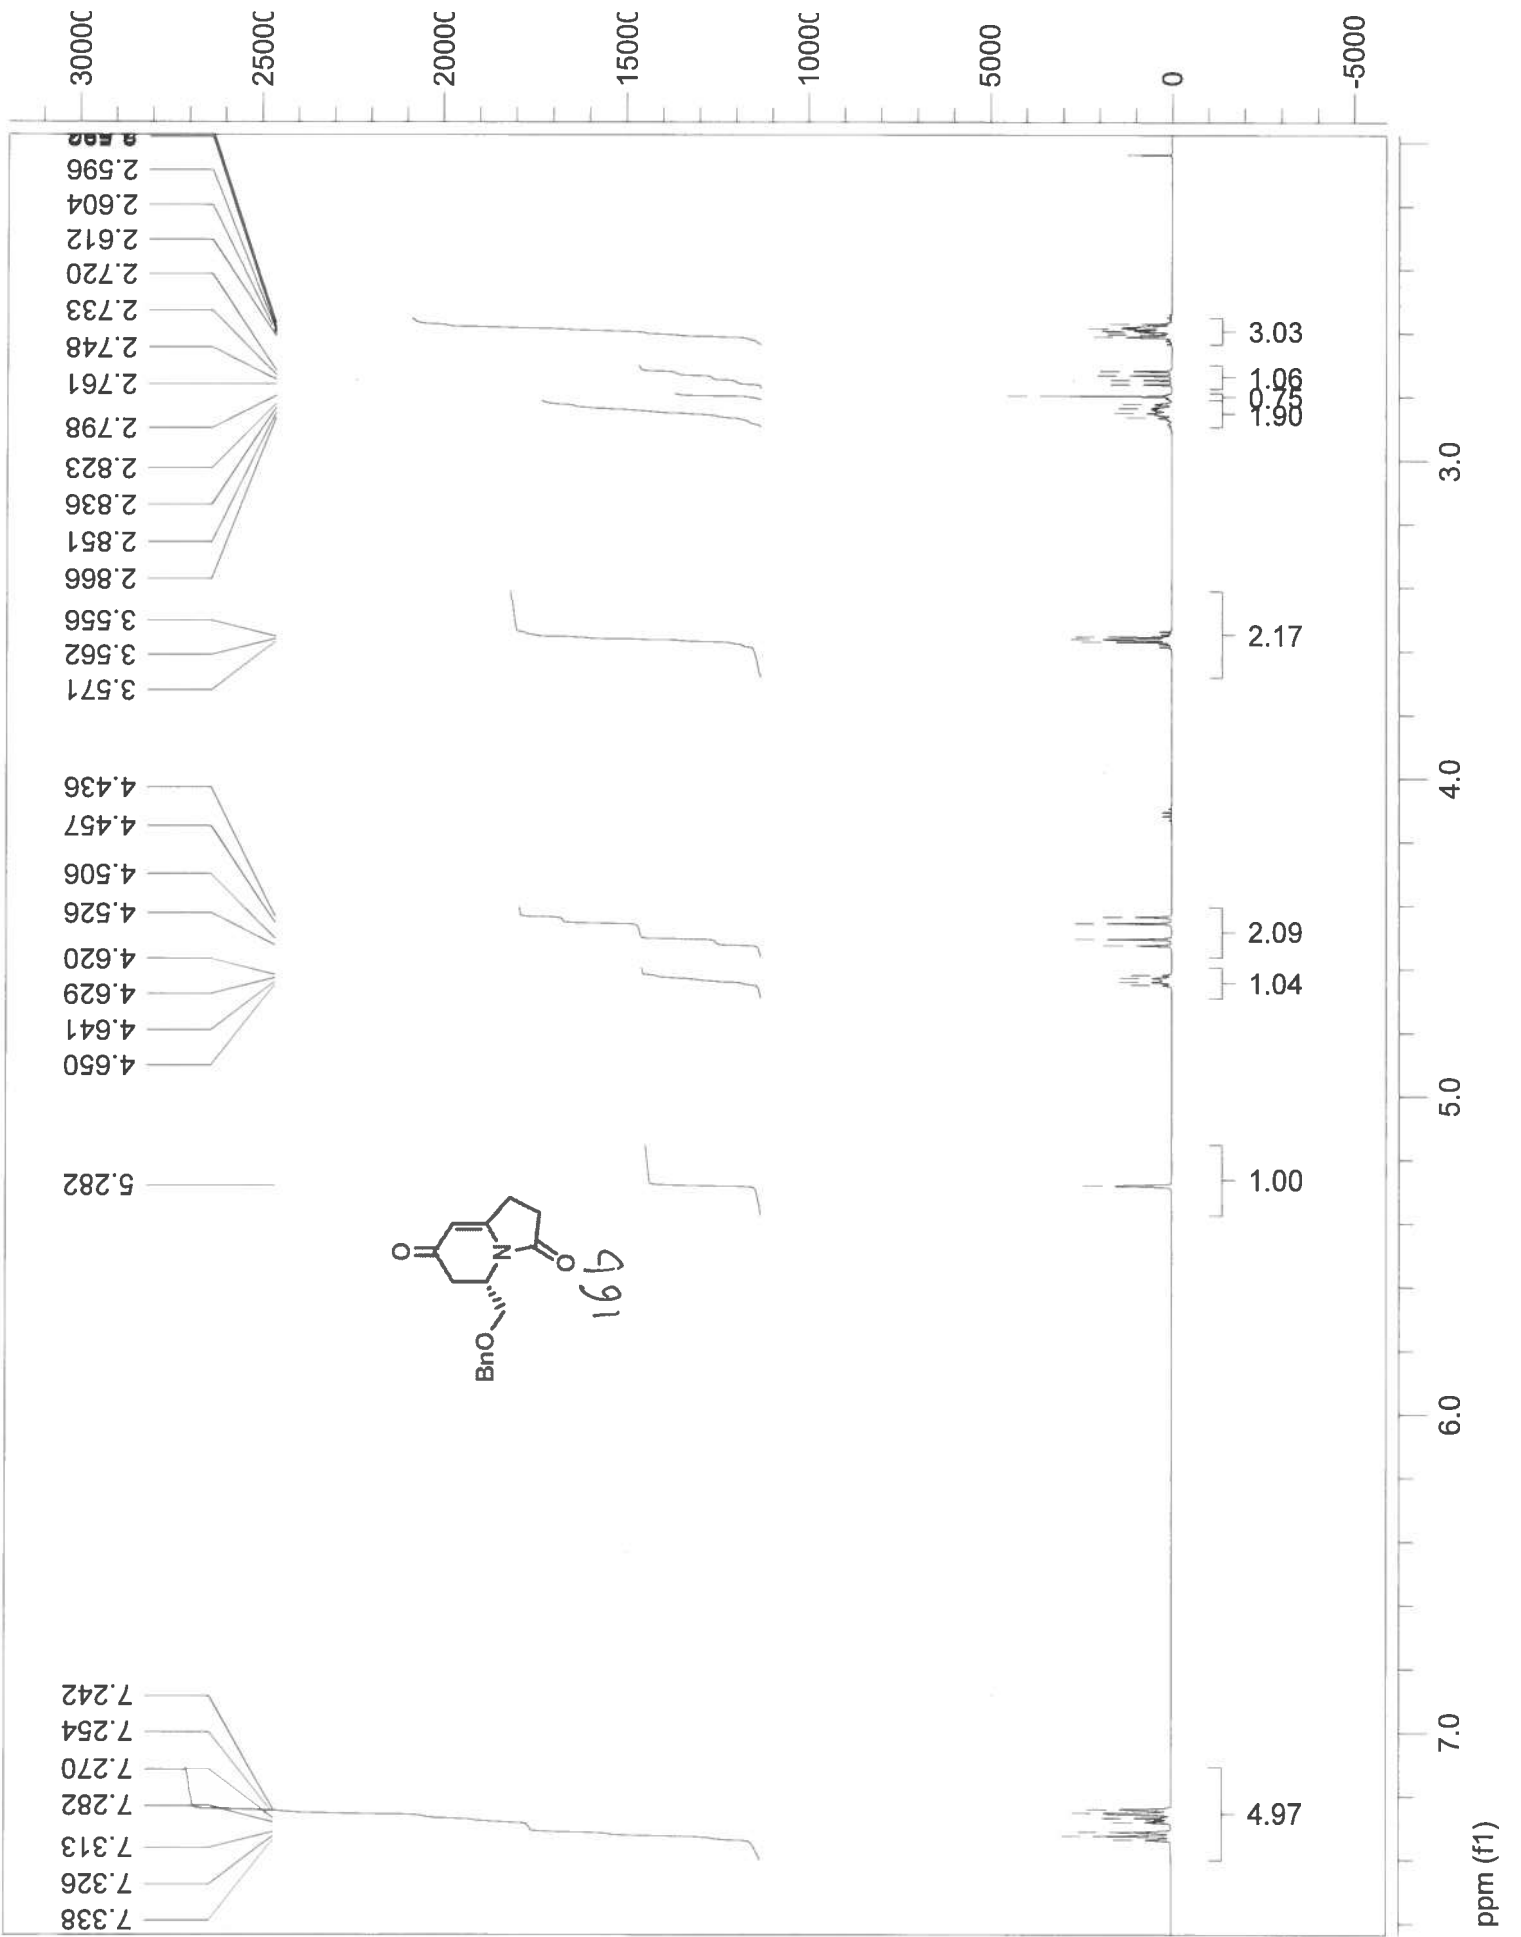

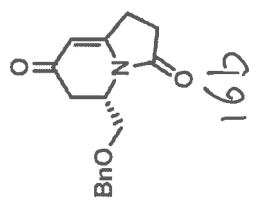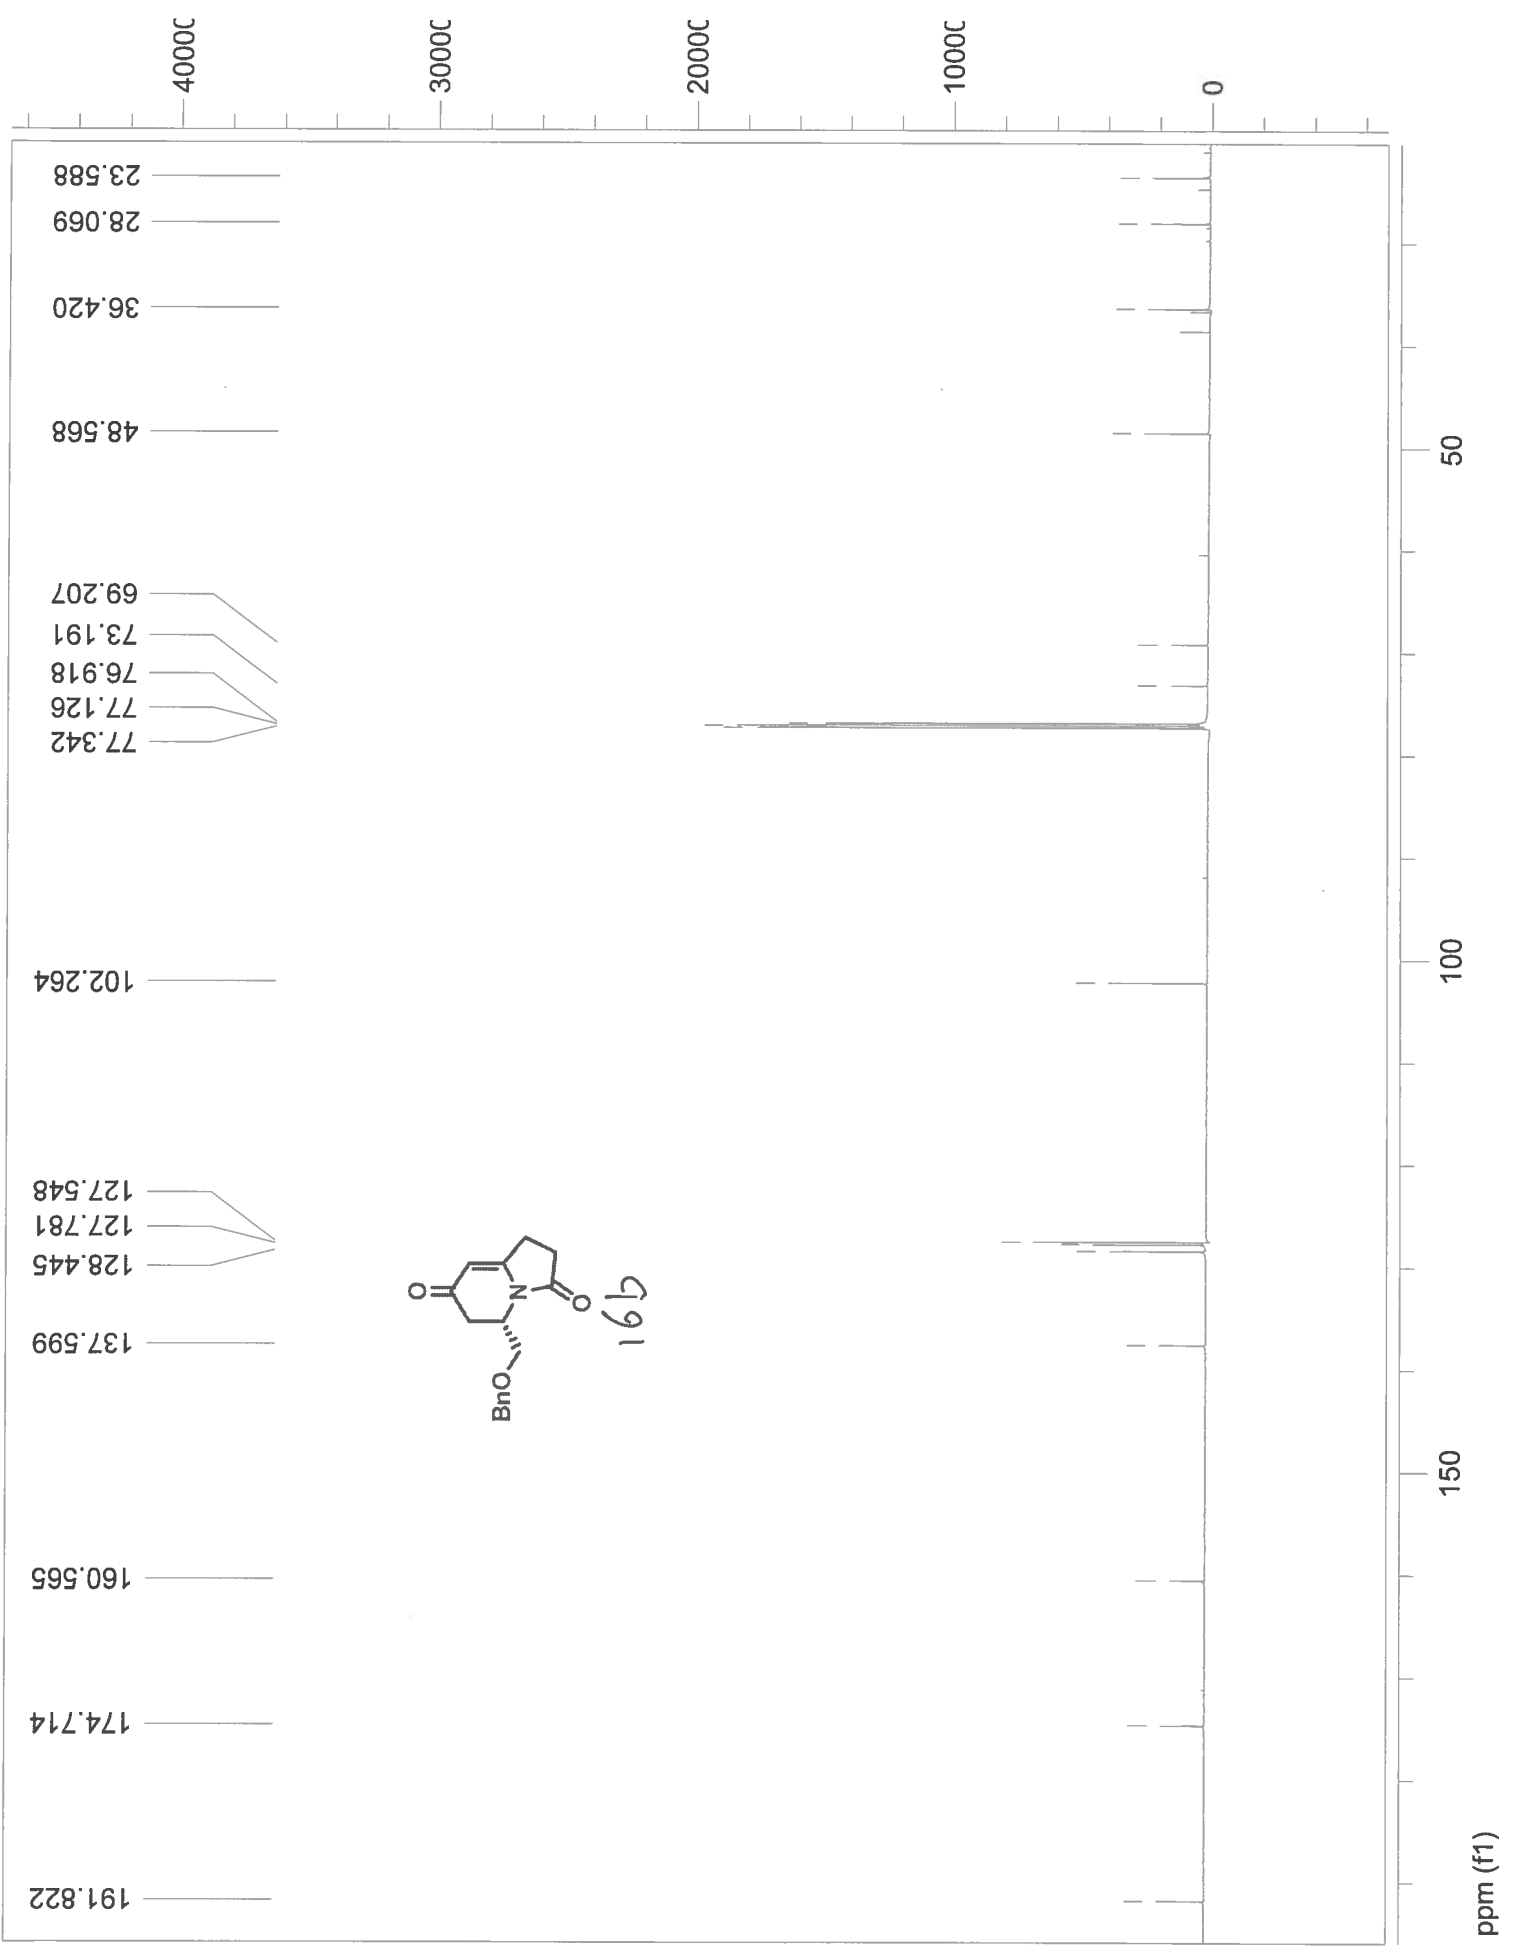

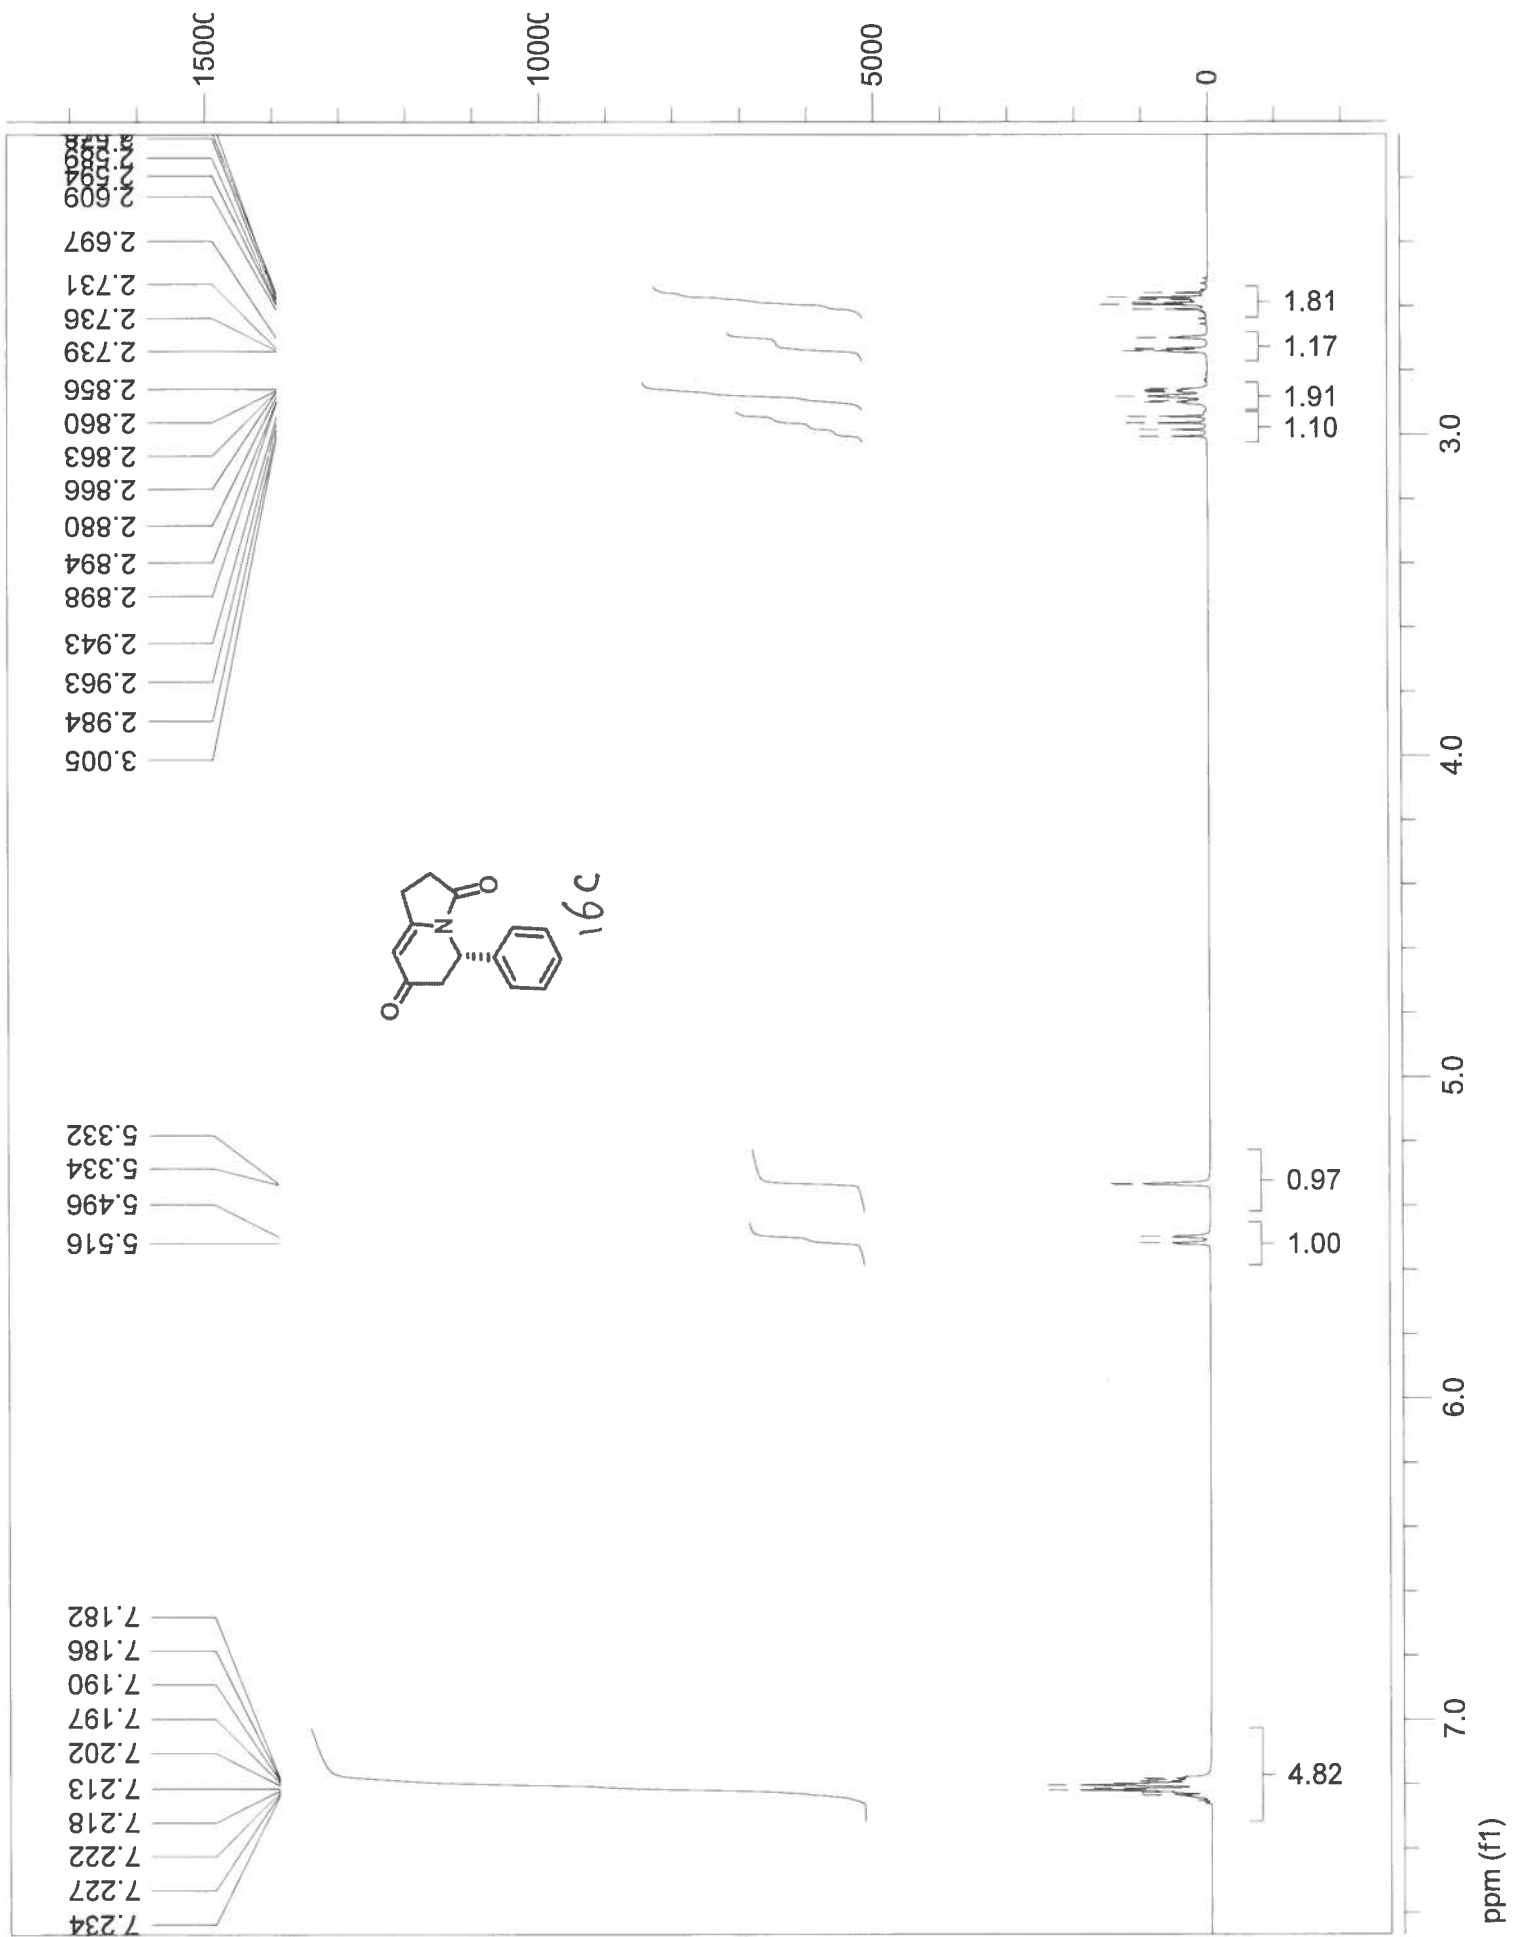

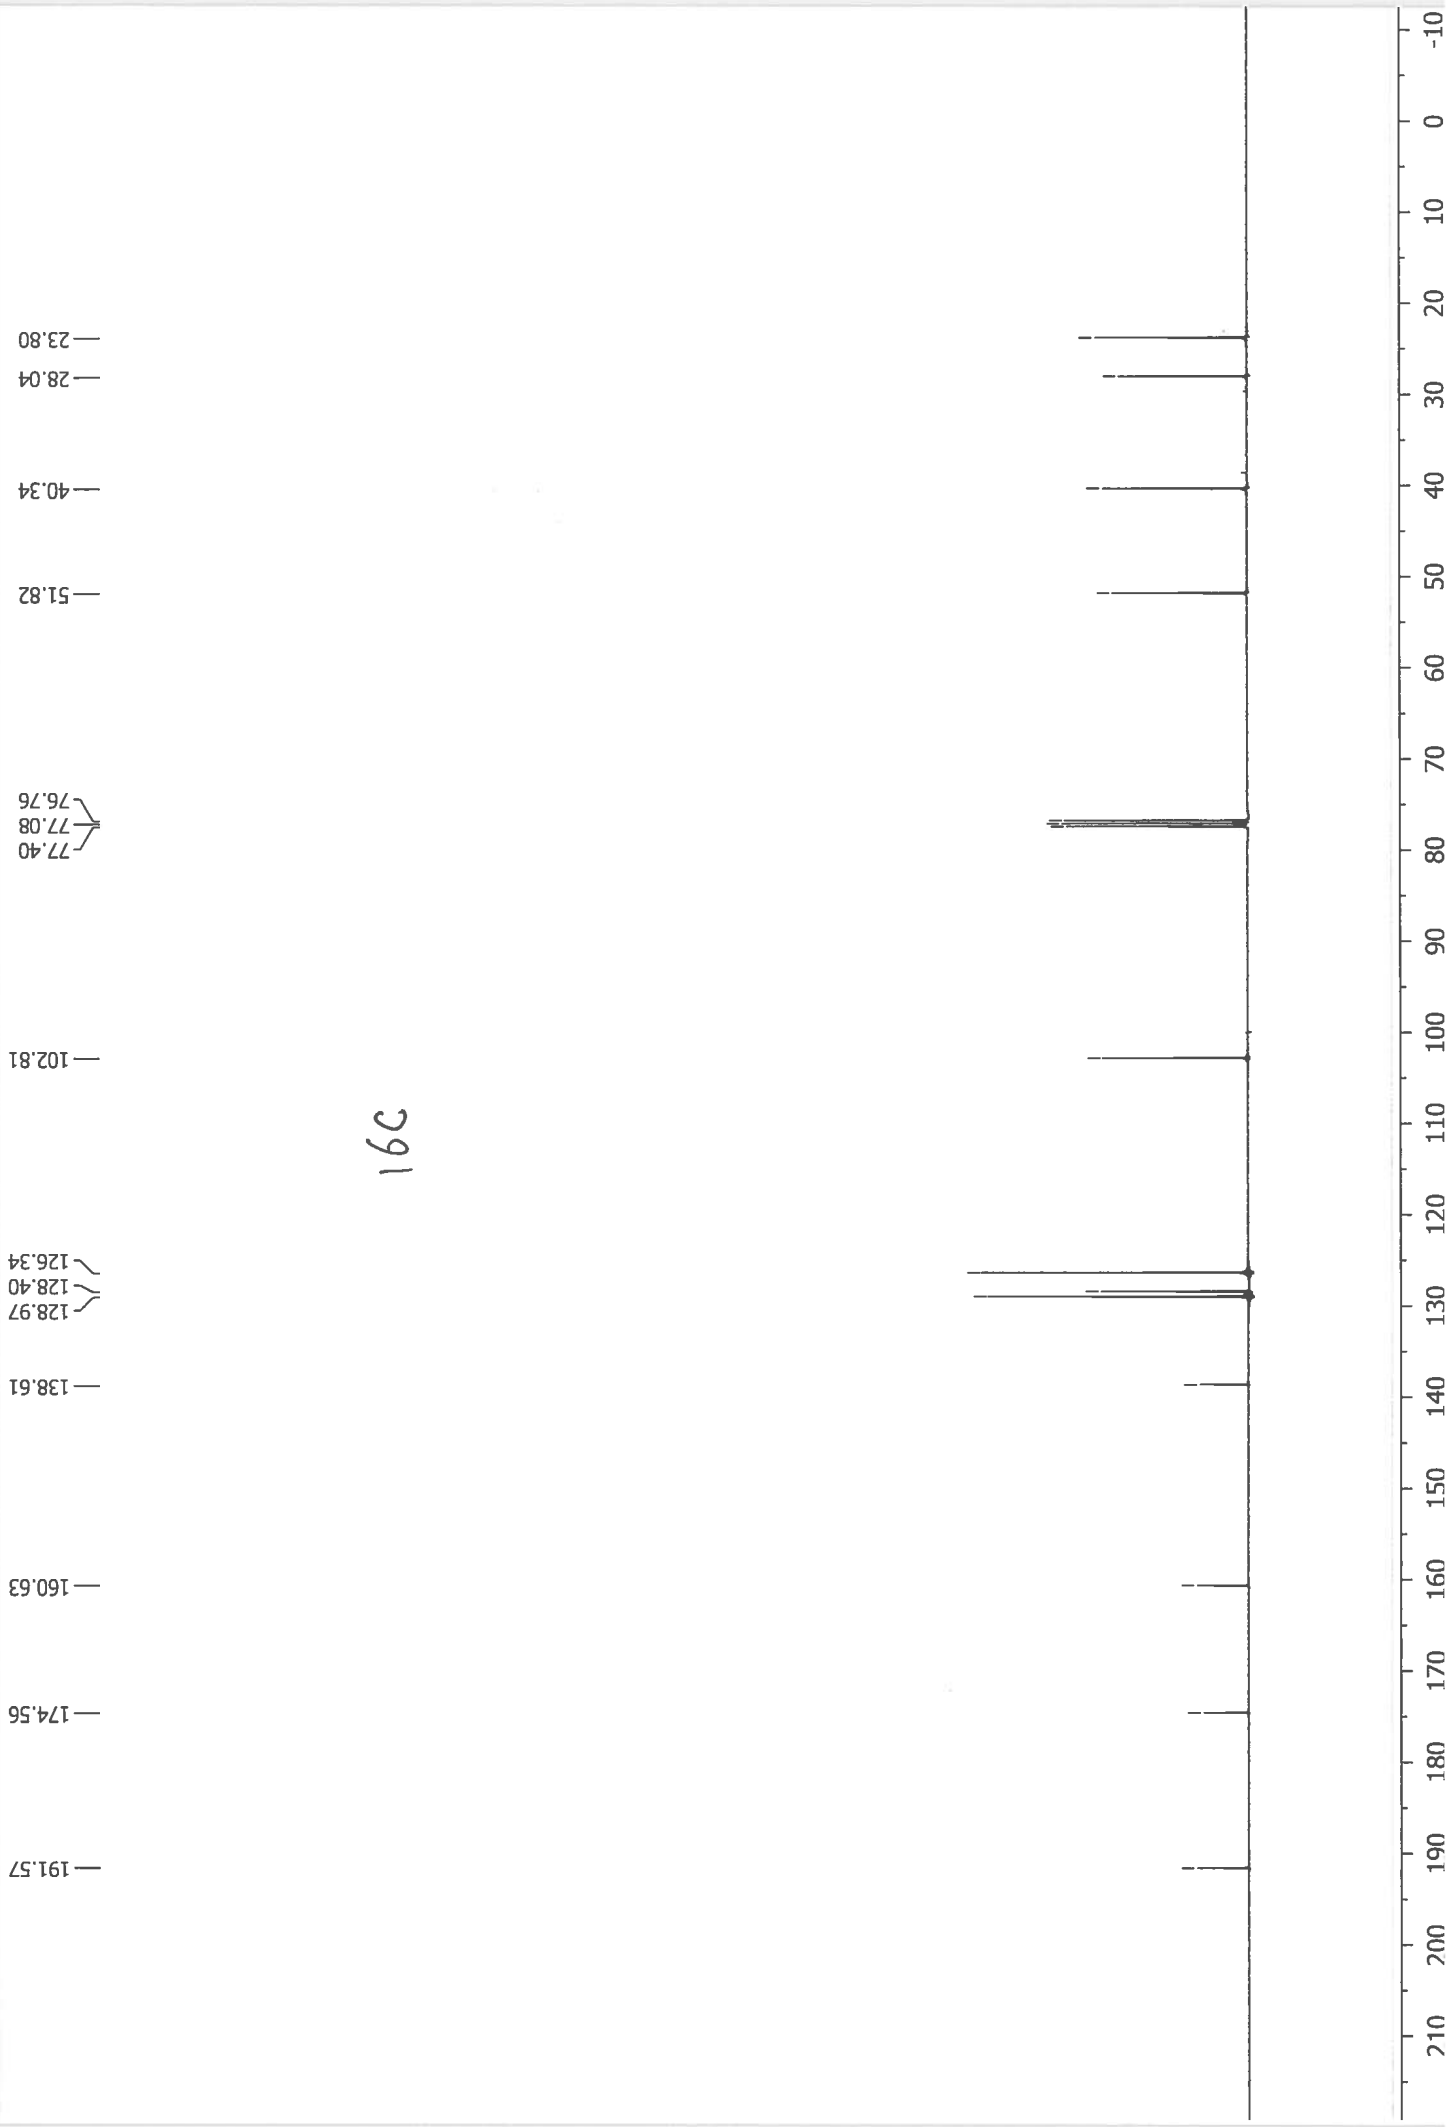

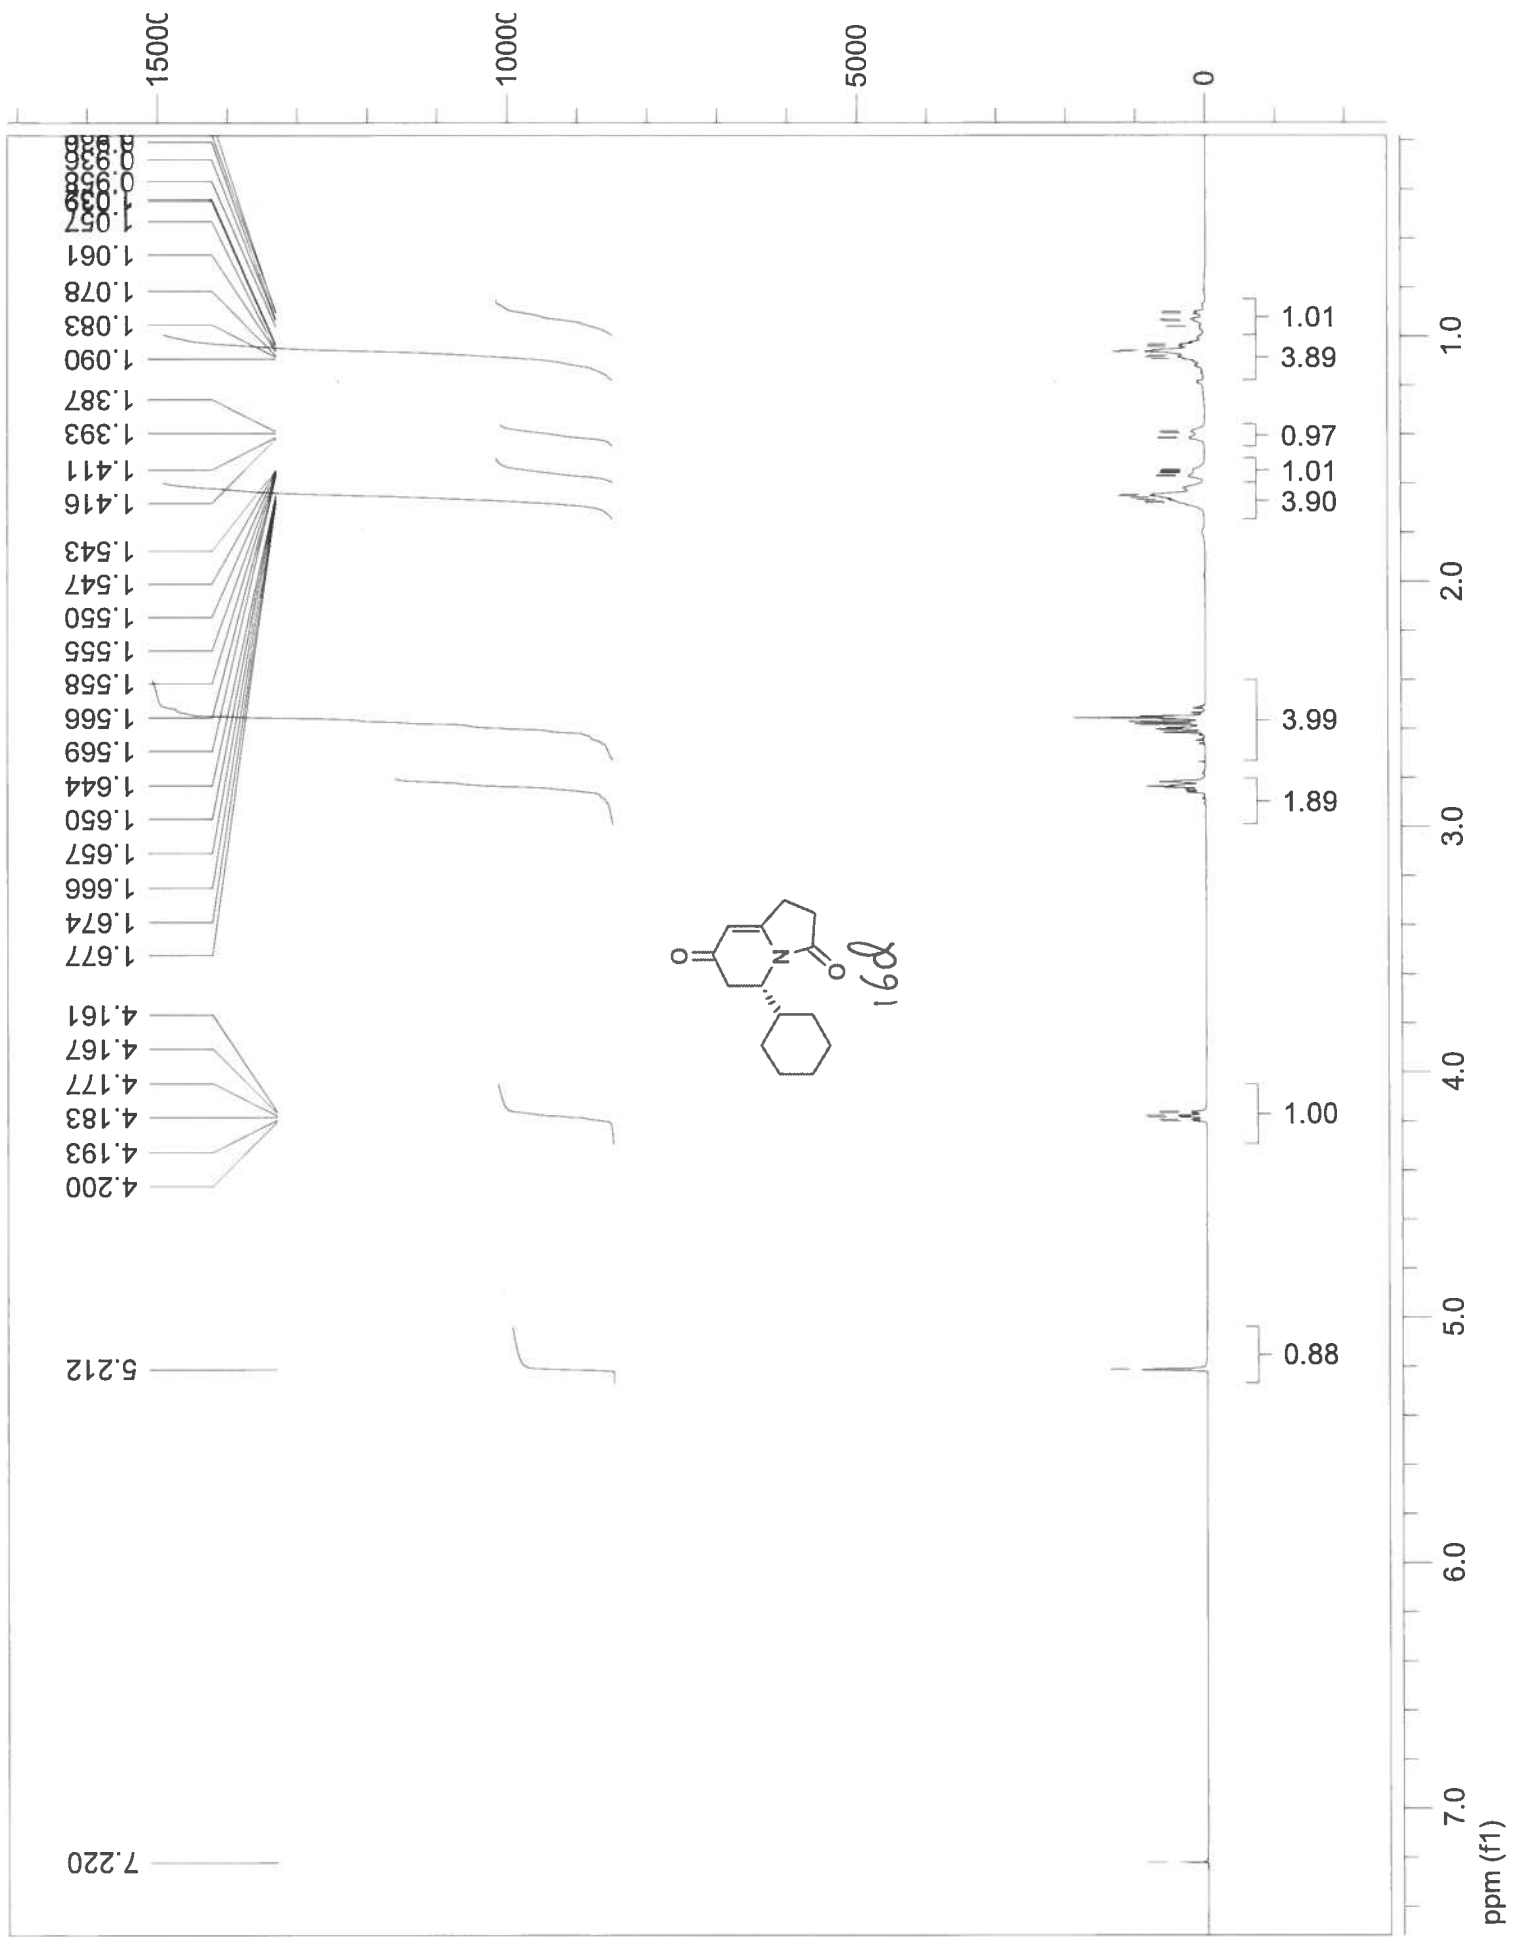



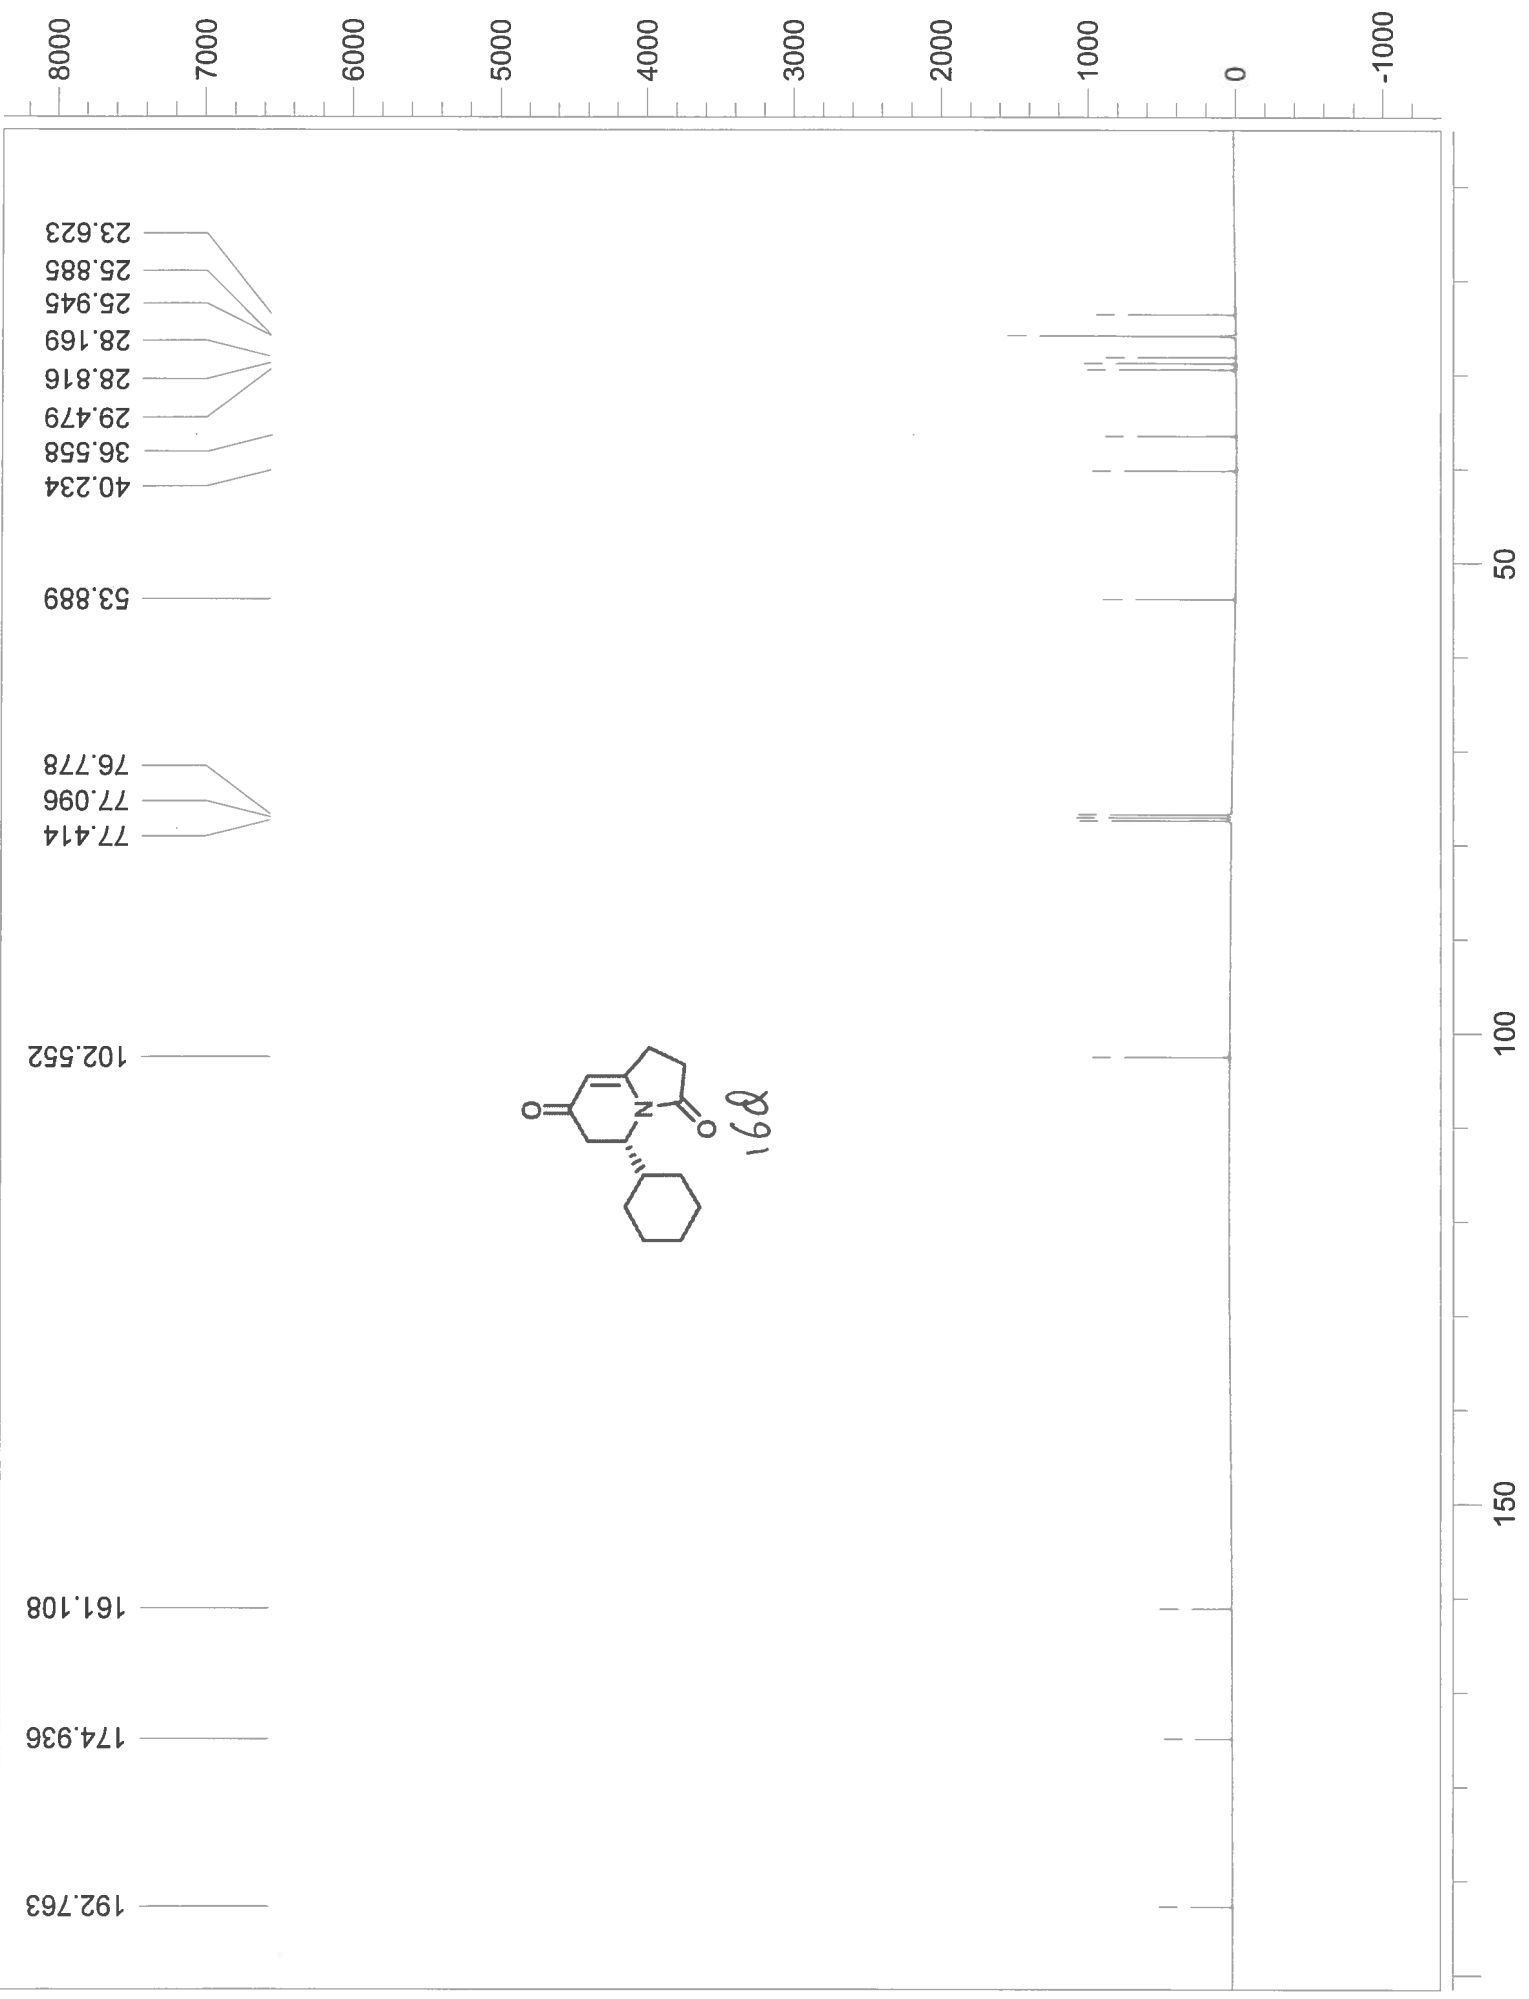

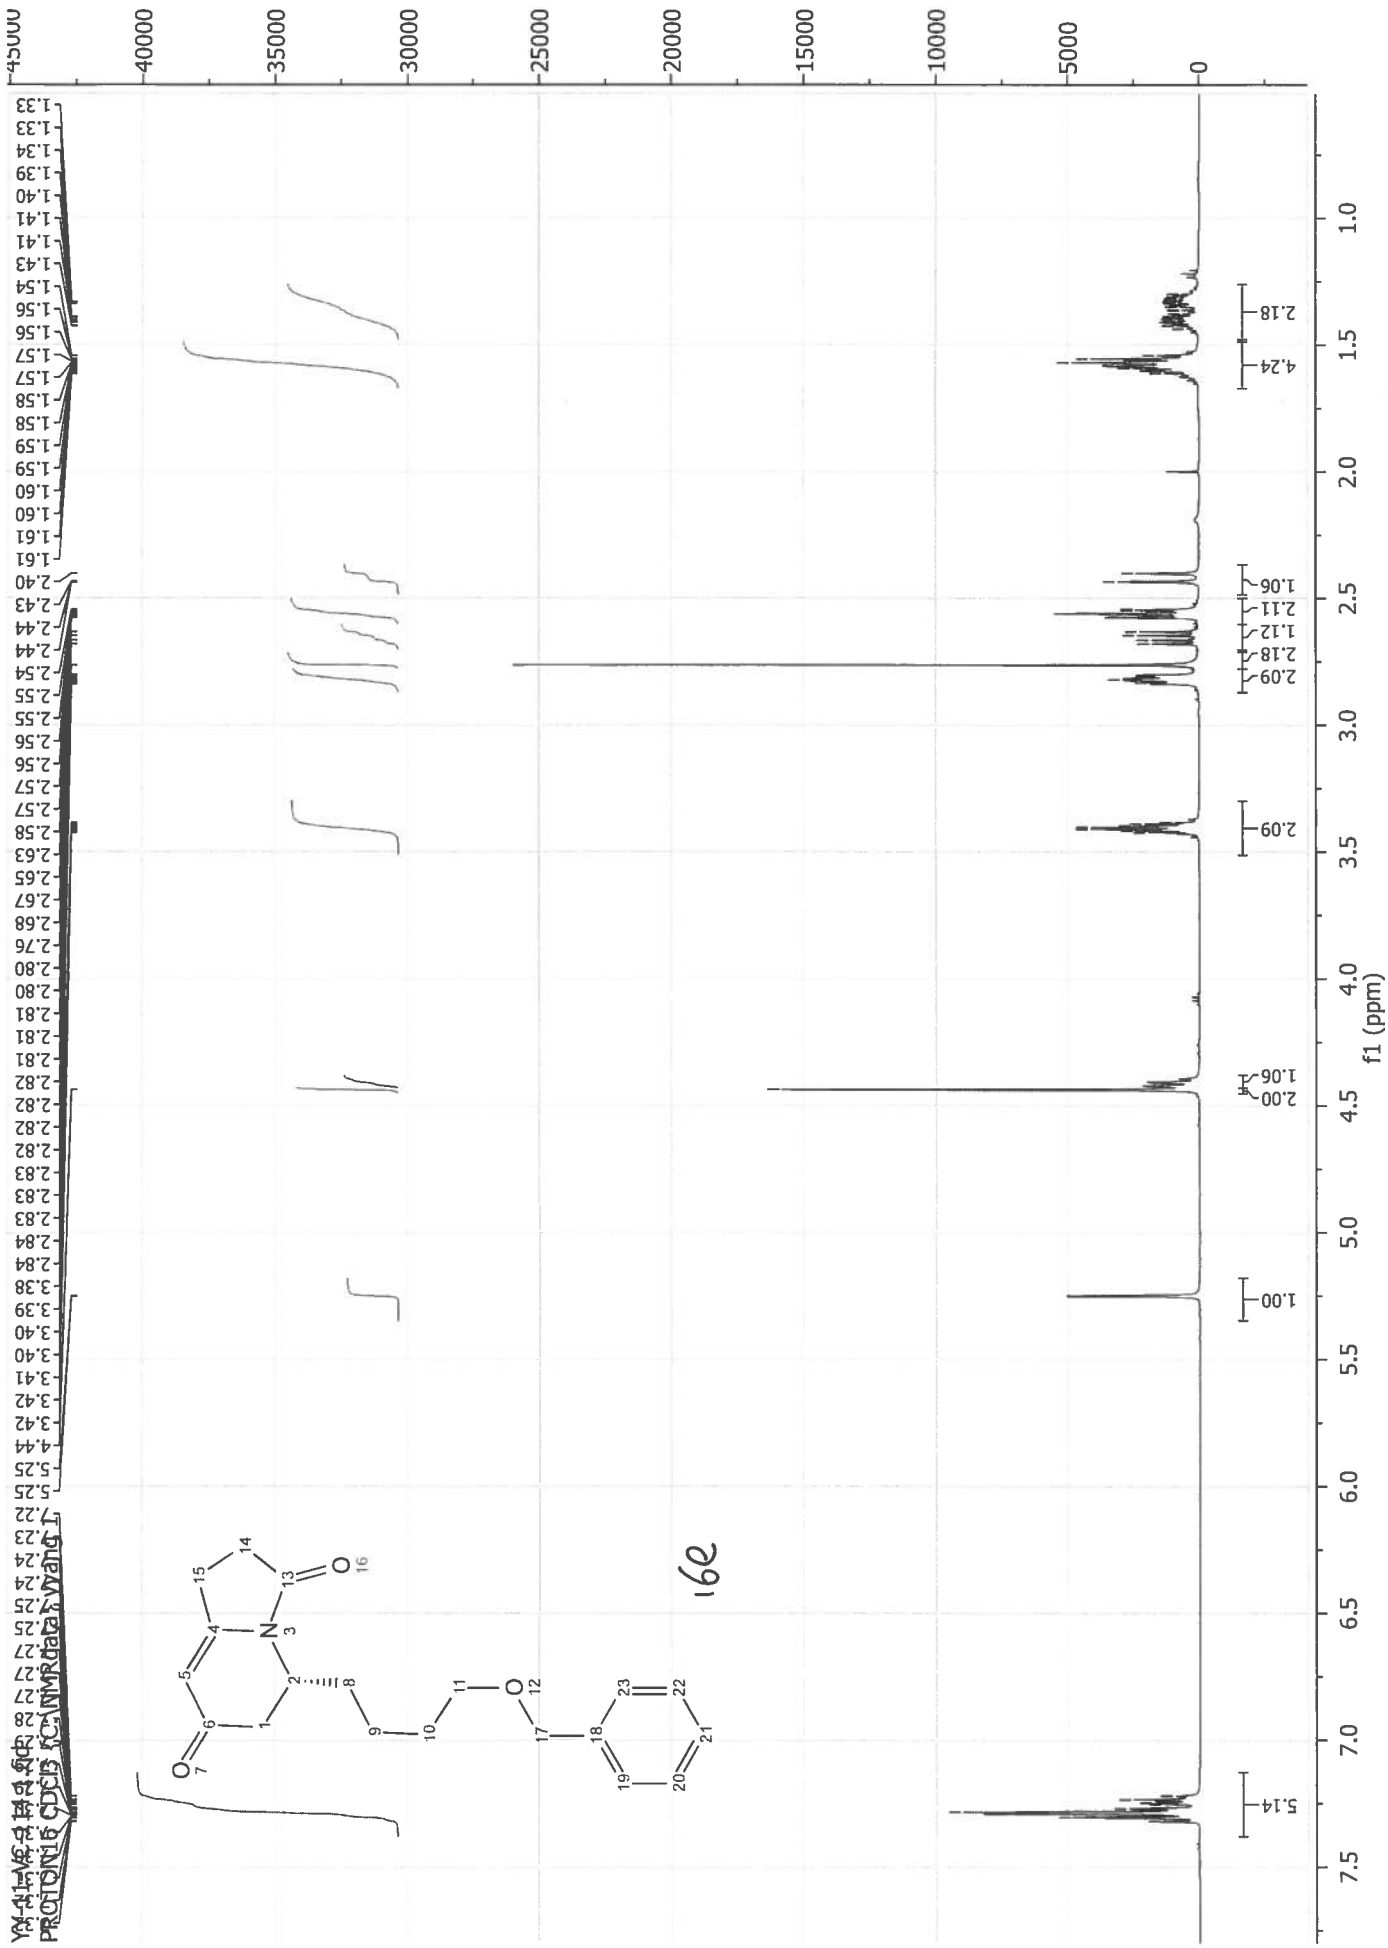

YAN LIANG, ZHANG QIANG  
 PROTON 16 CD15 SC-MMRdata\16e

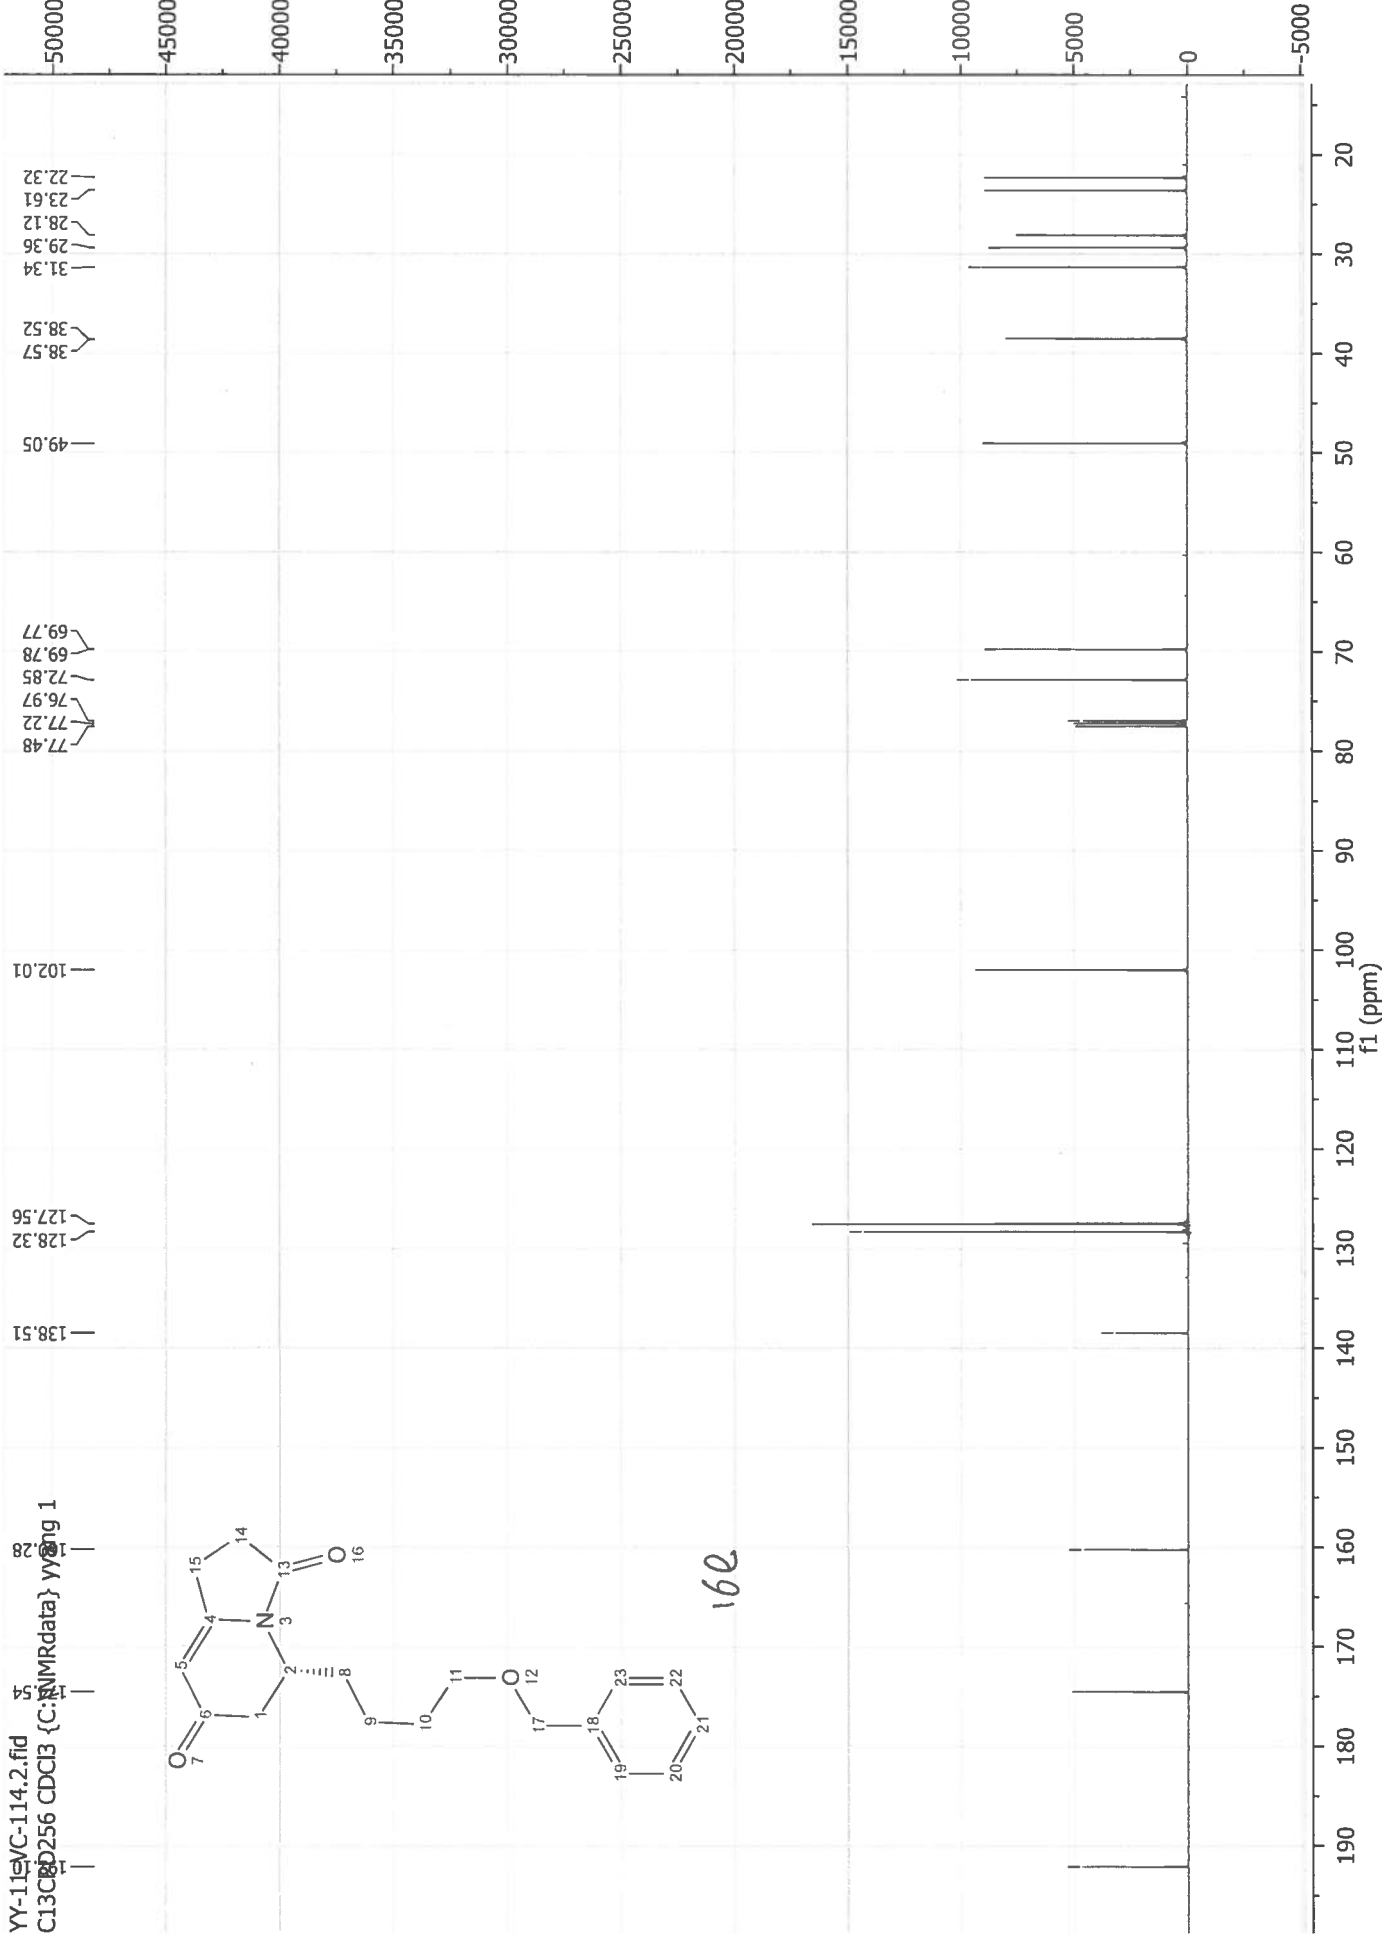

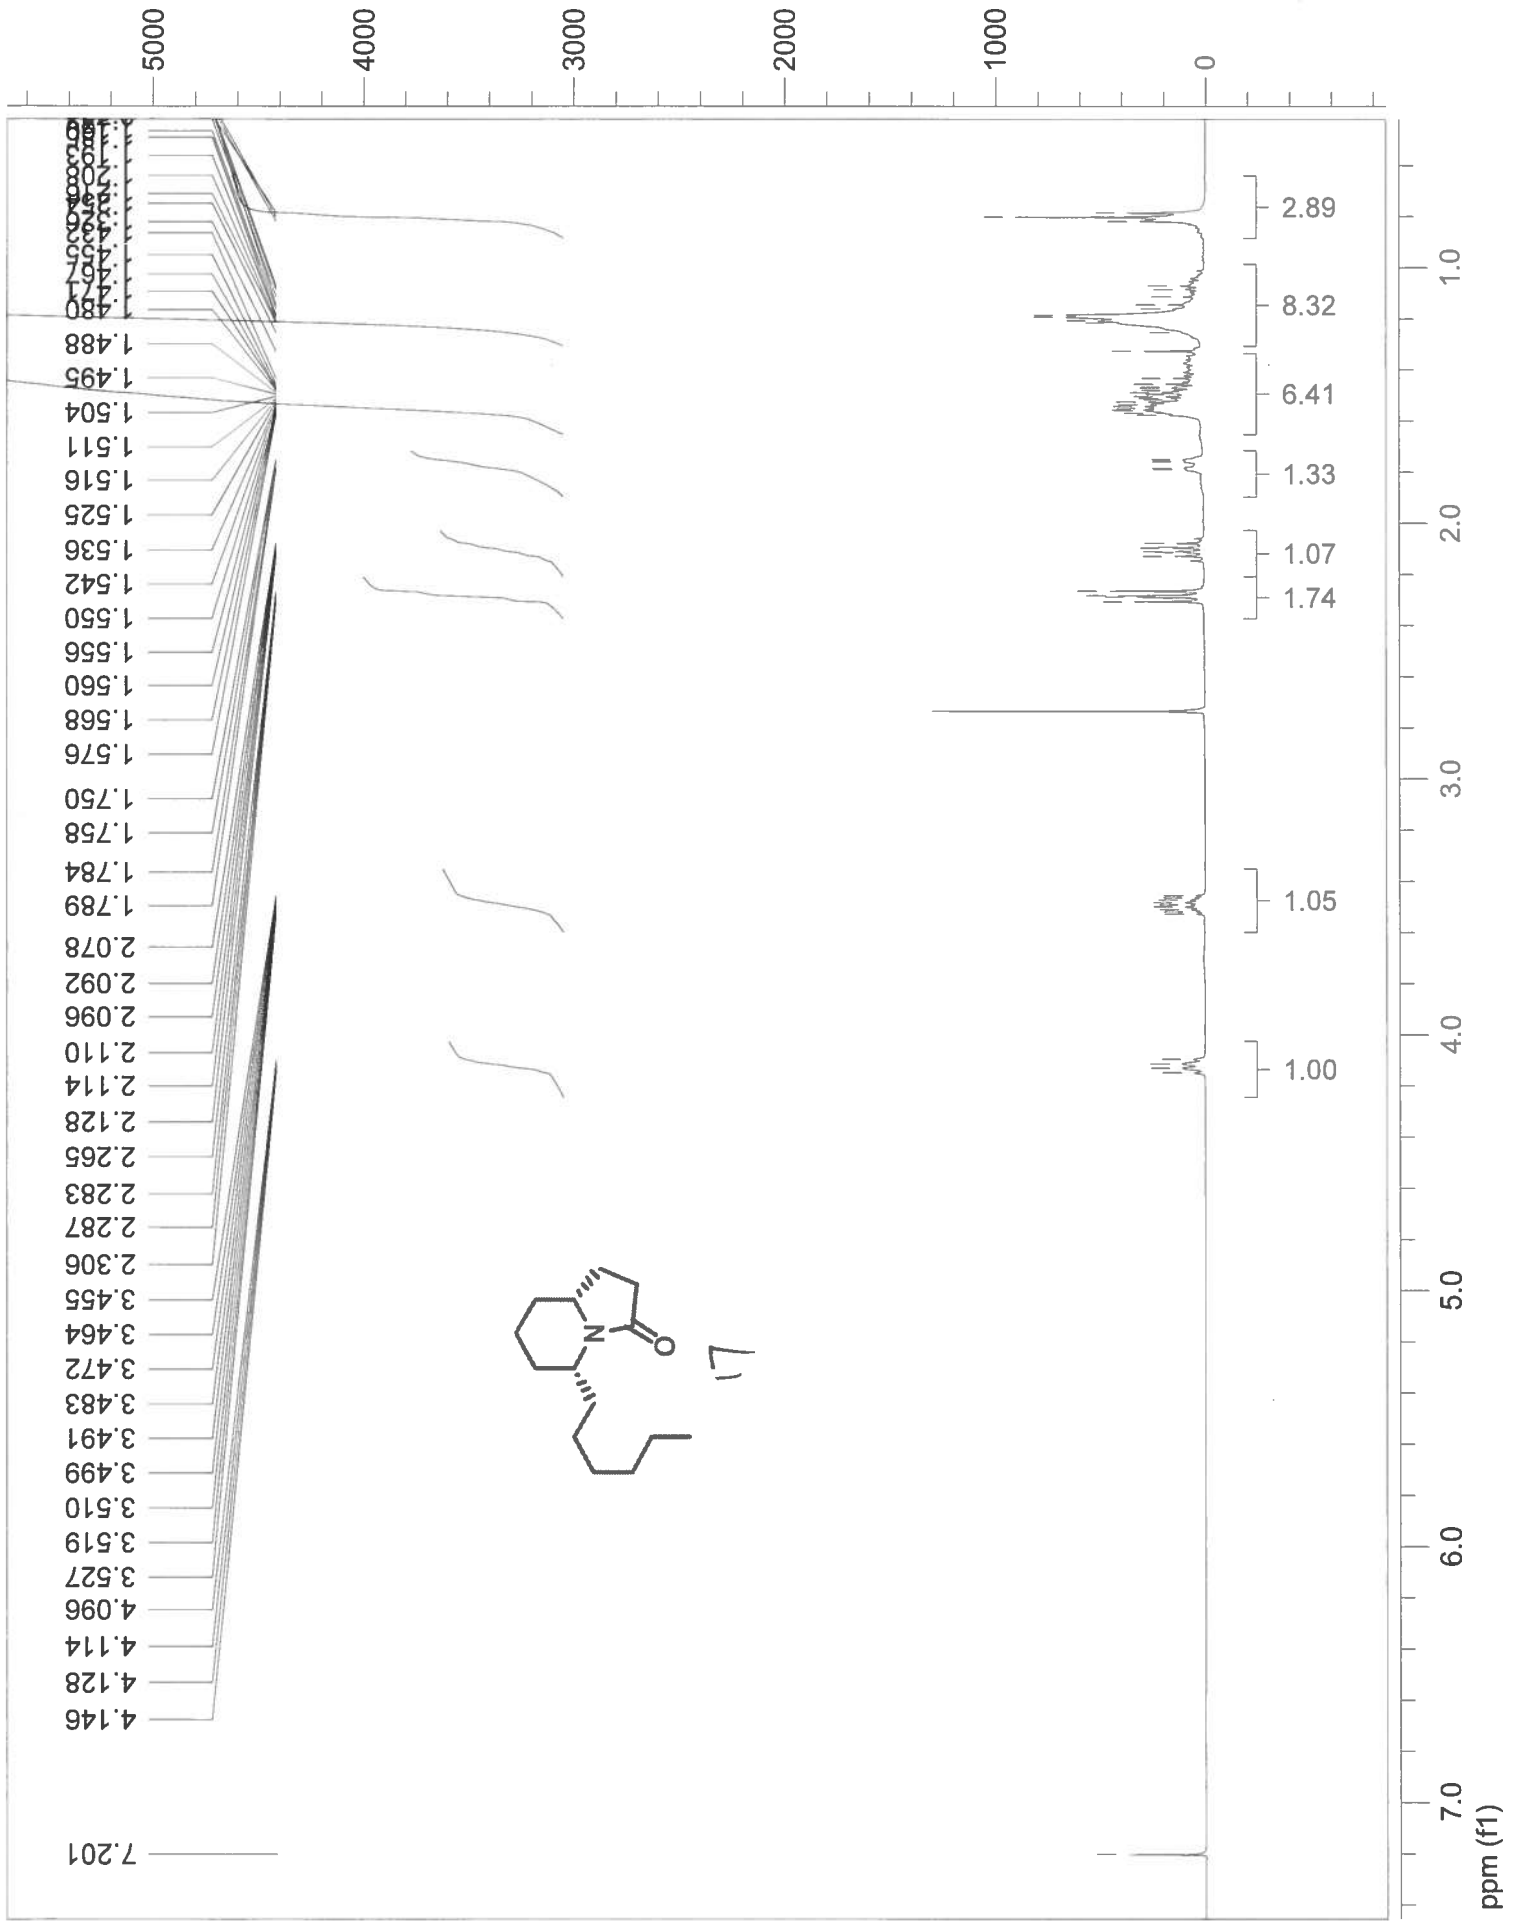

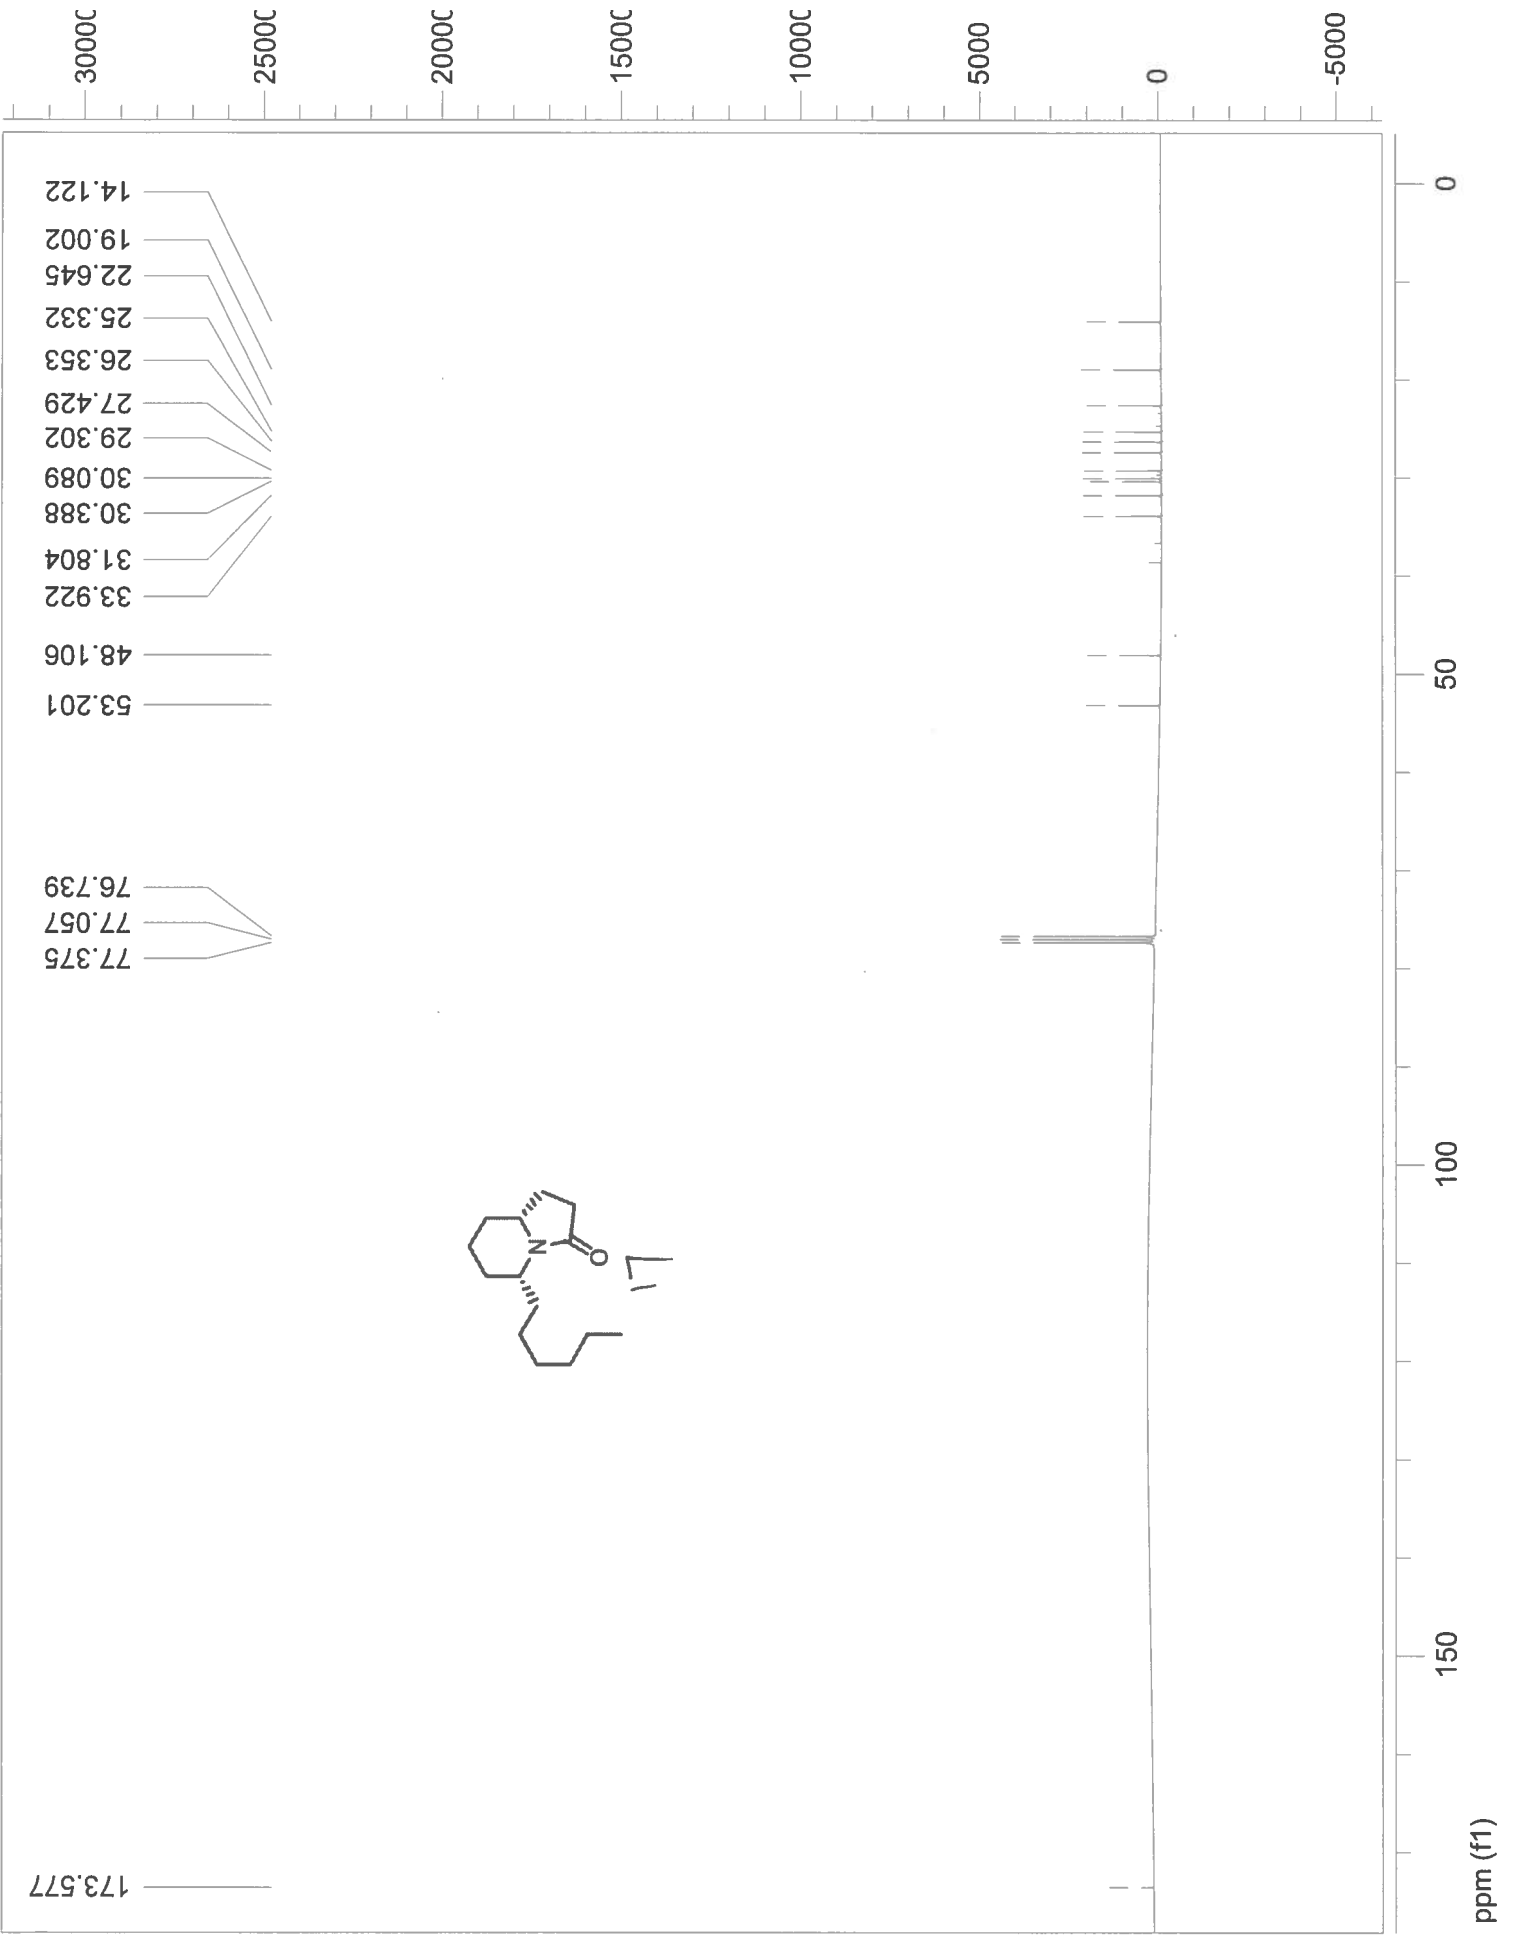

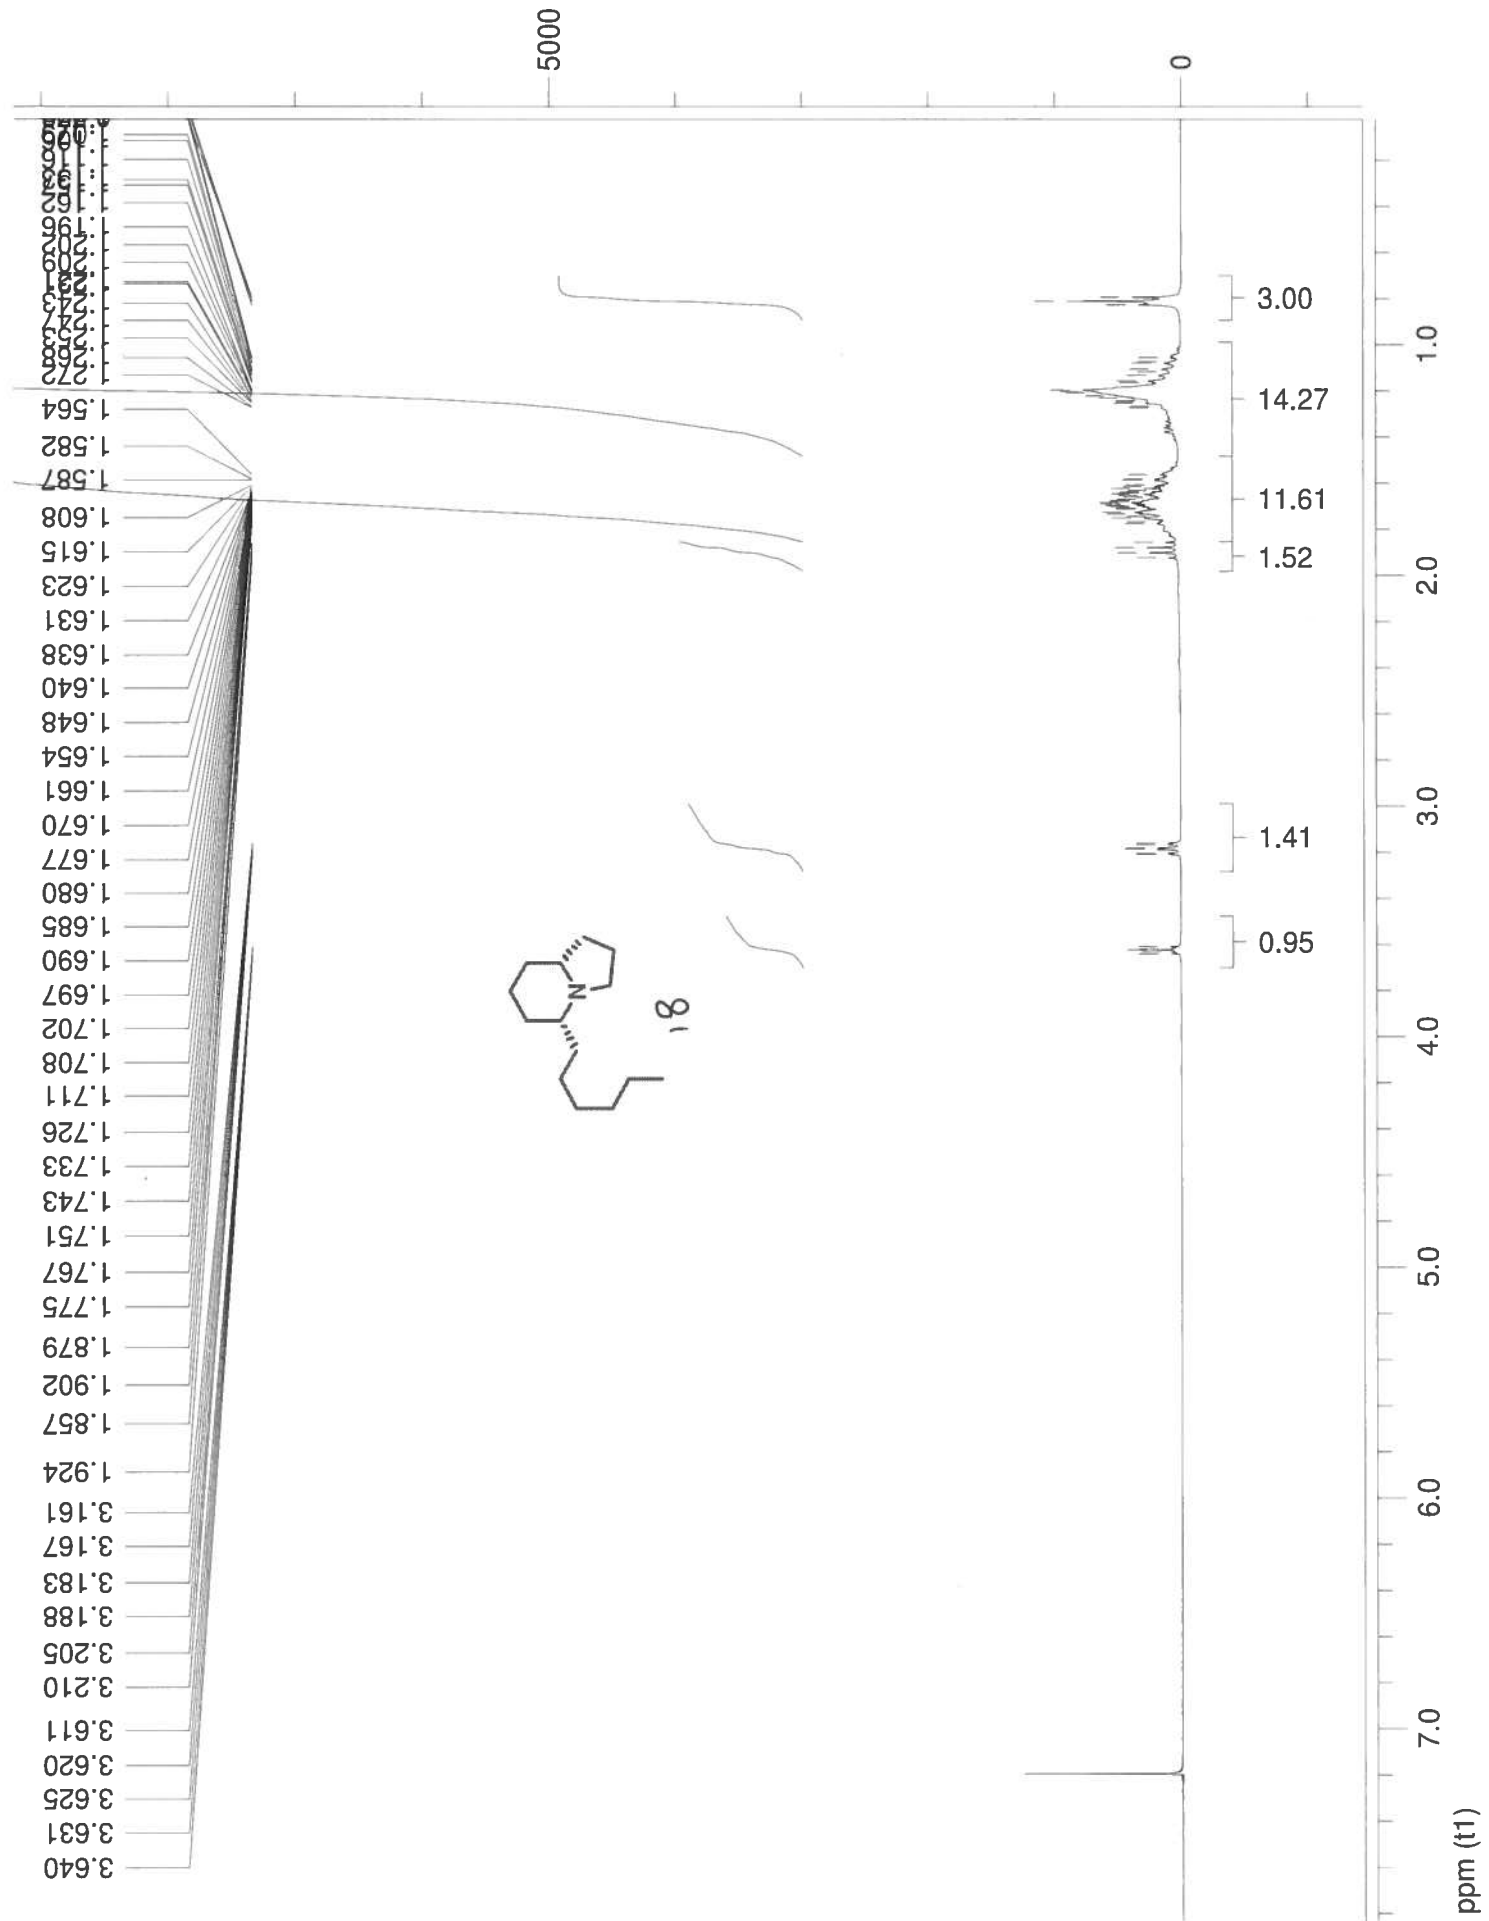

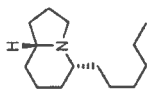

18  
(-)-indolizidine209D

18

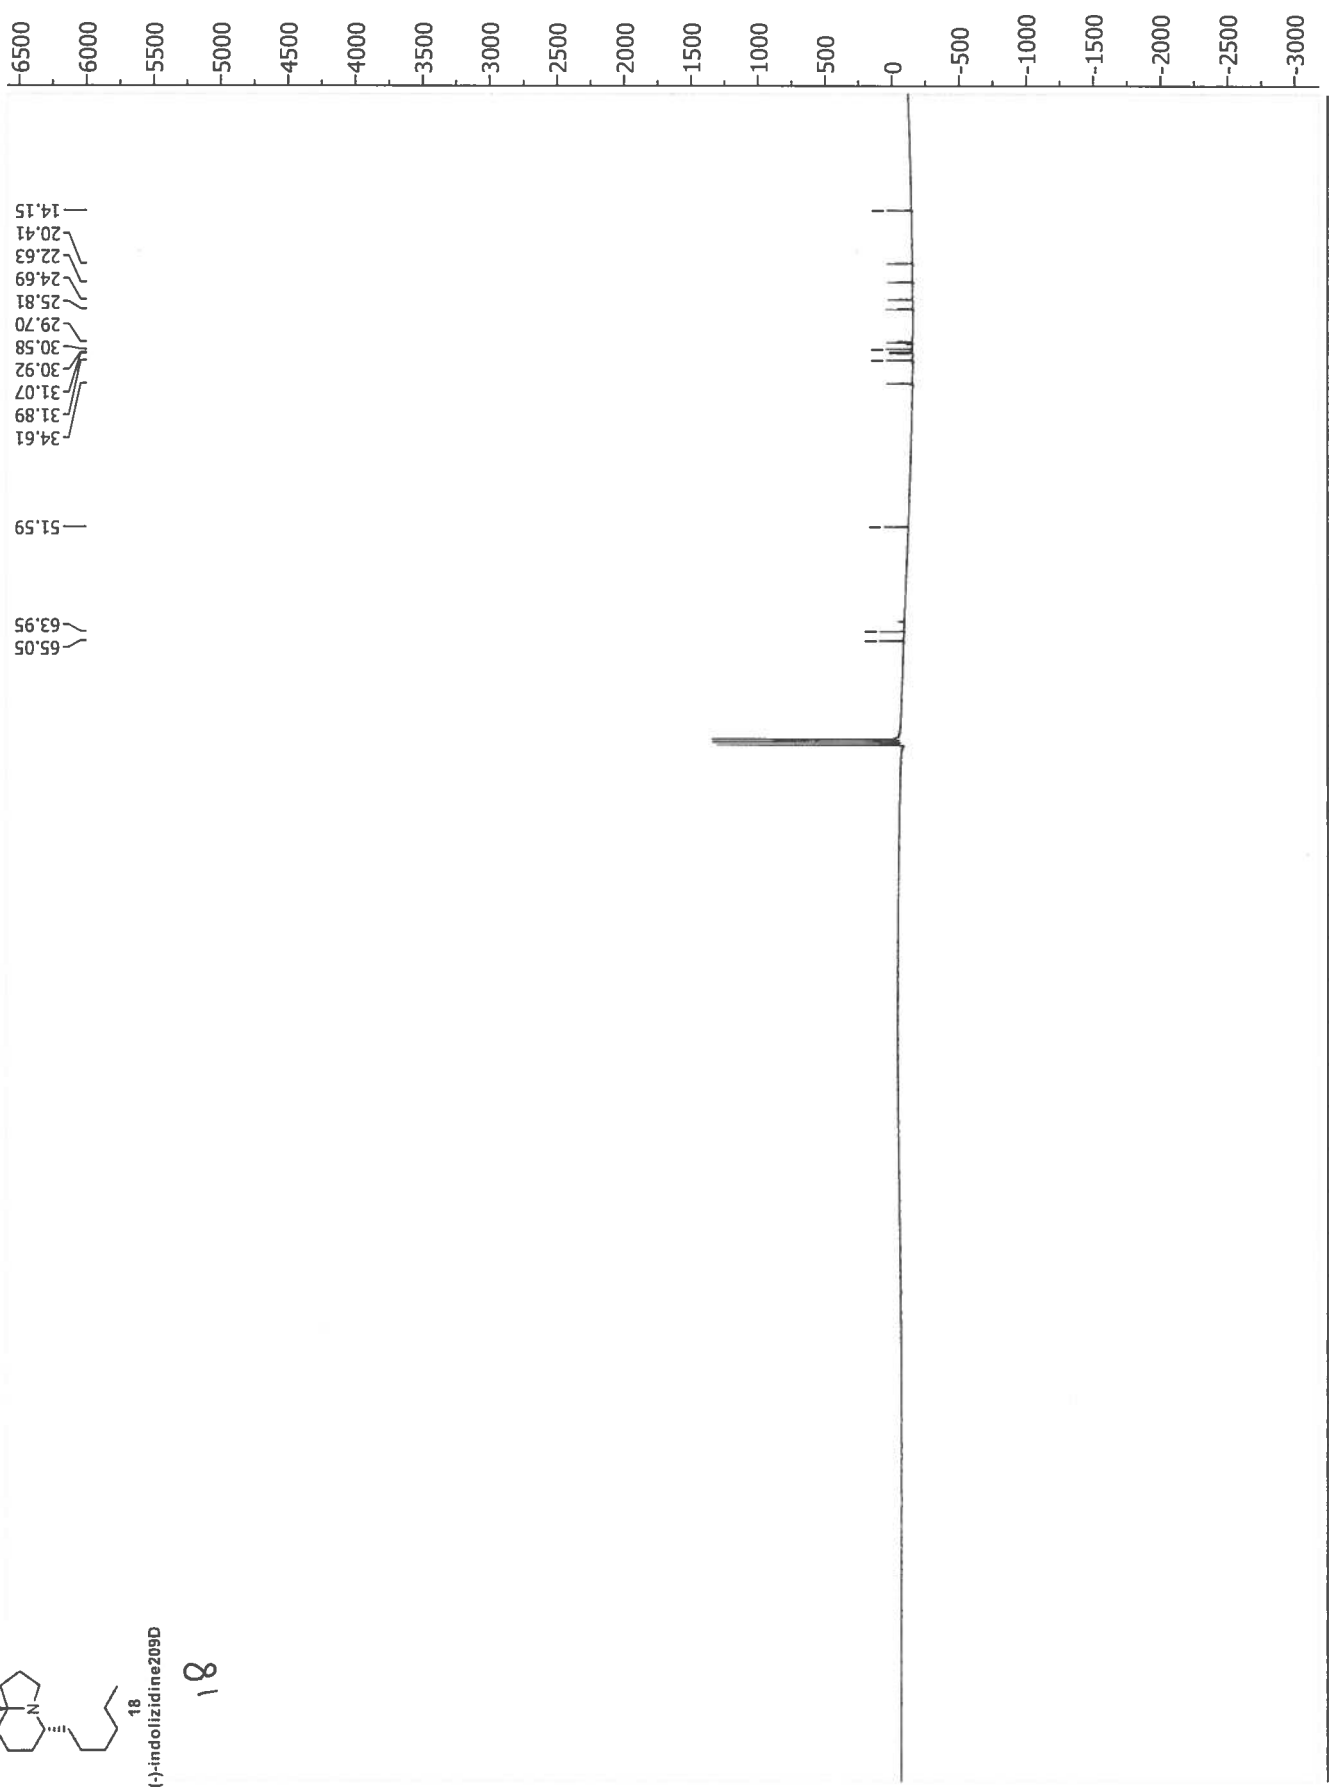

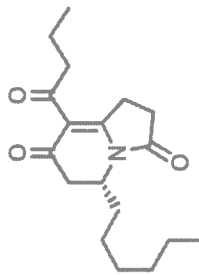

Chemical Formula:  $C_{18}H_{27}NO_3$   
 Exact Mass: 305.19909  
 Molecular Weight: 305.41800

19

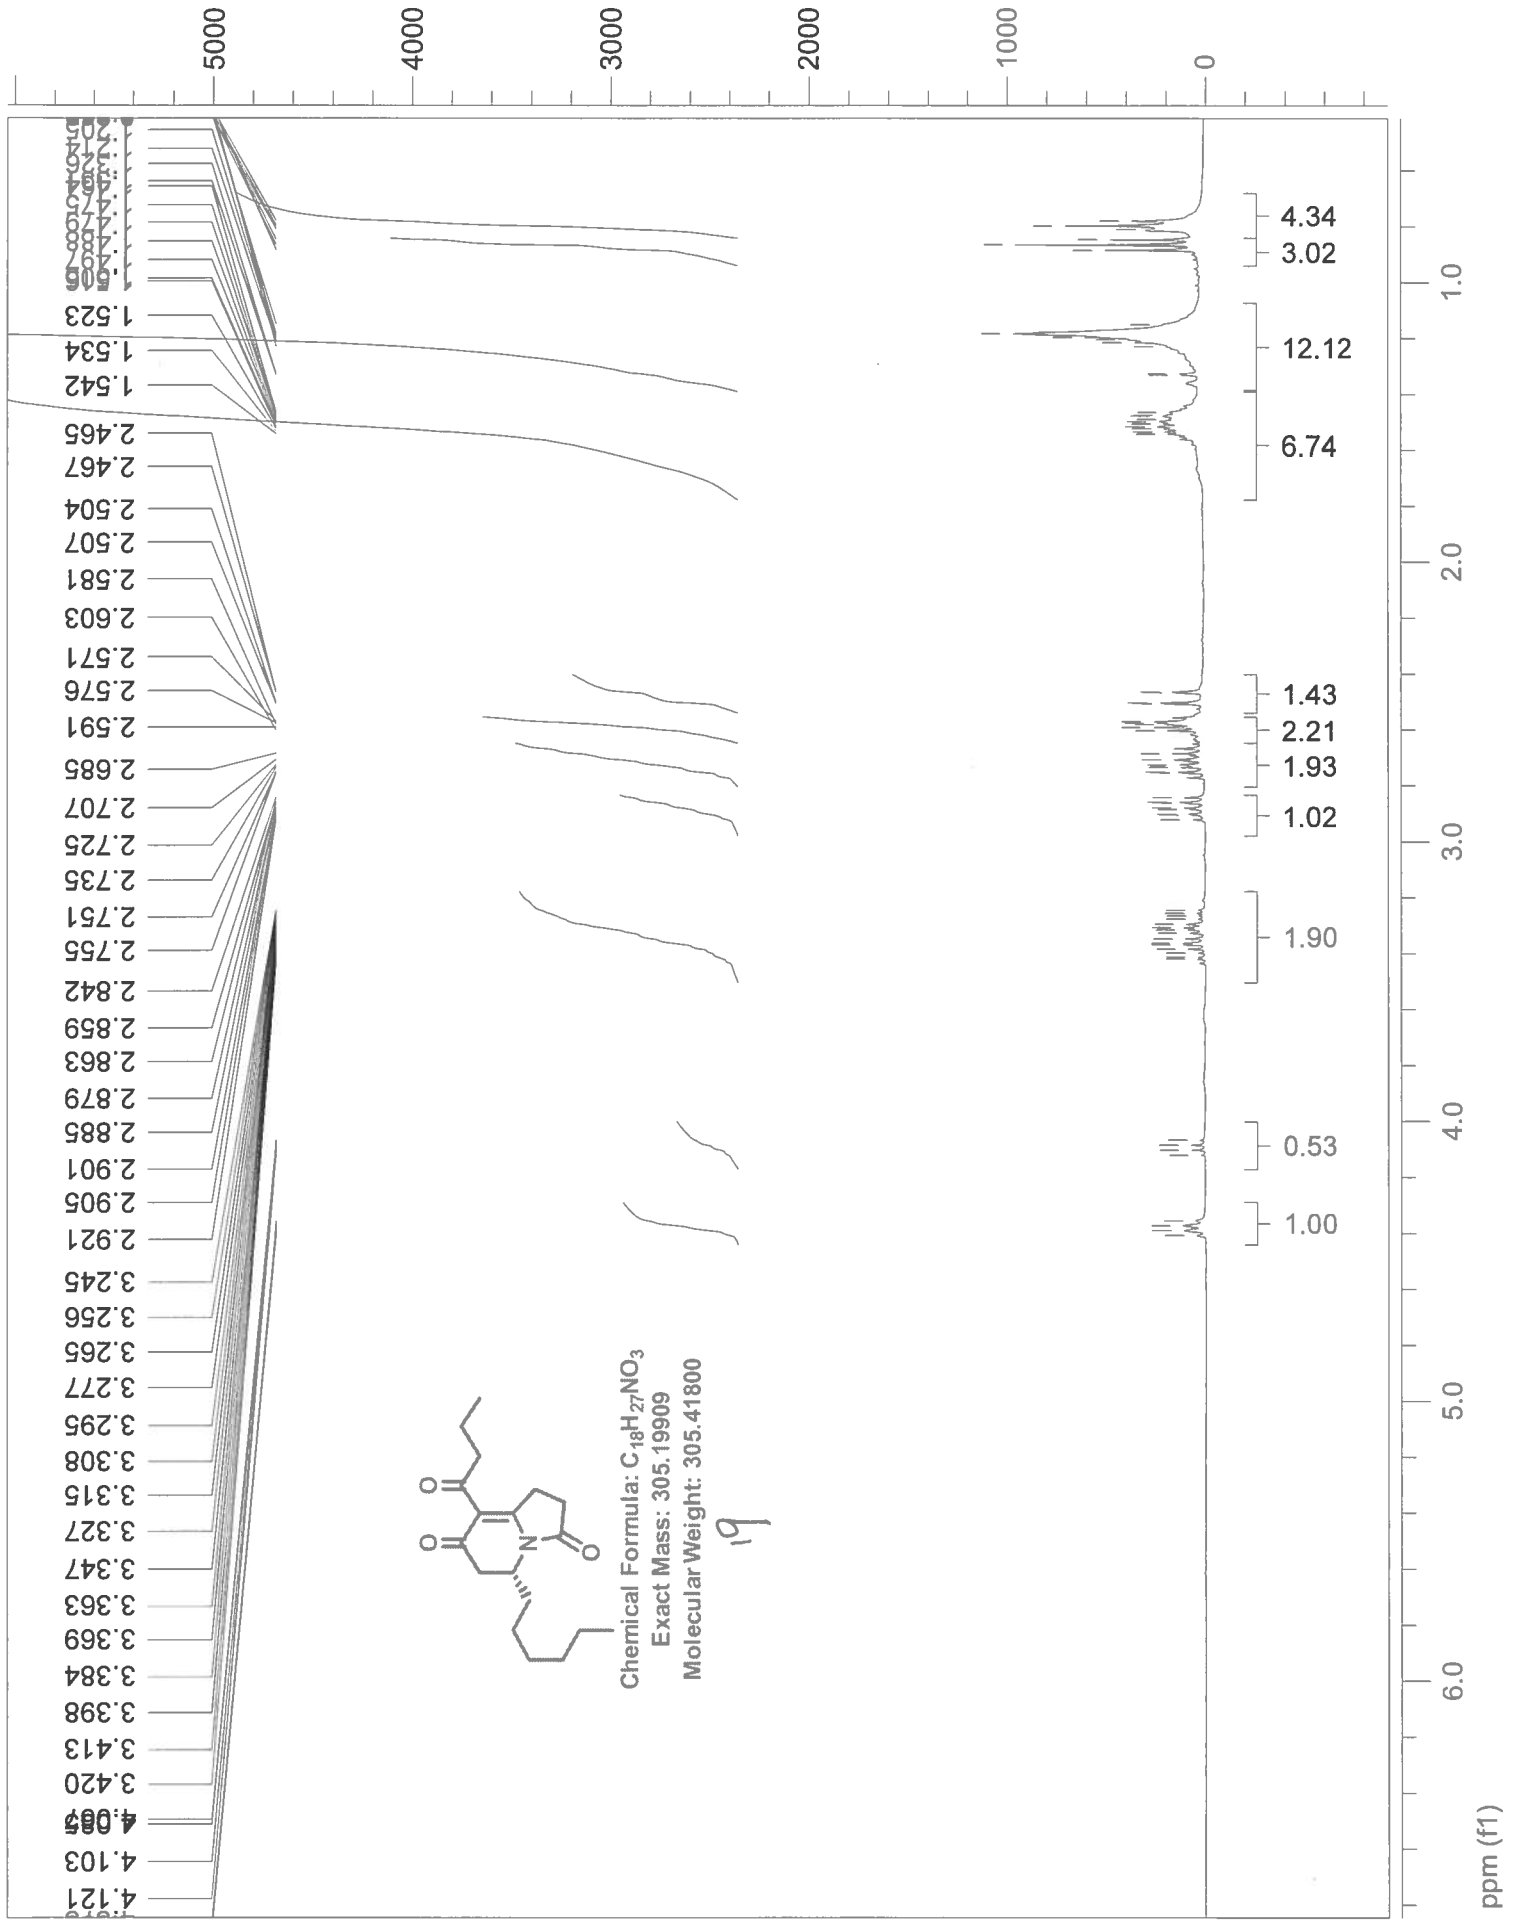



1D — yy-vc-39.2.fid —

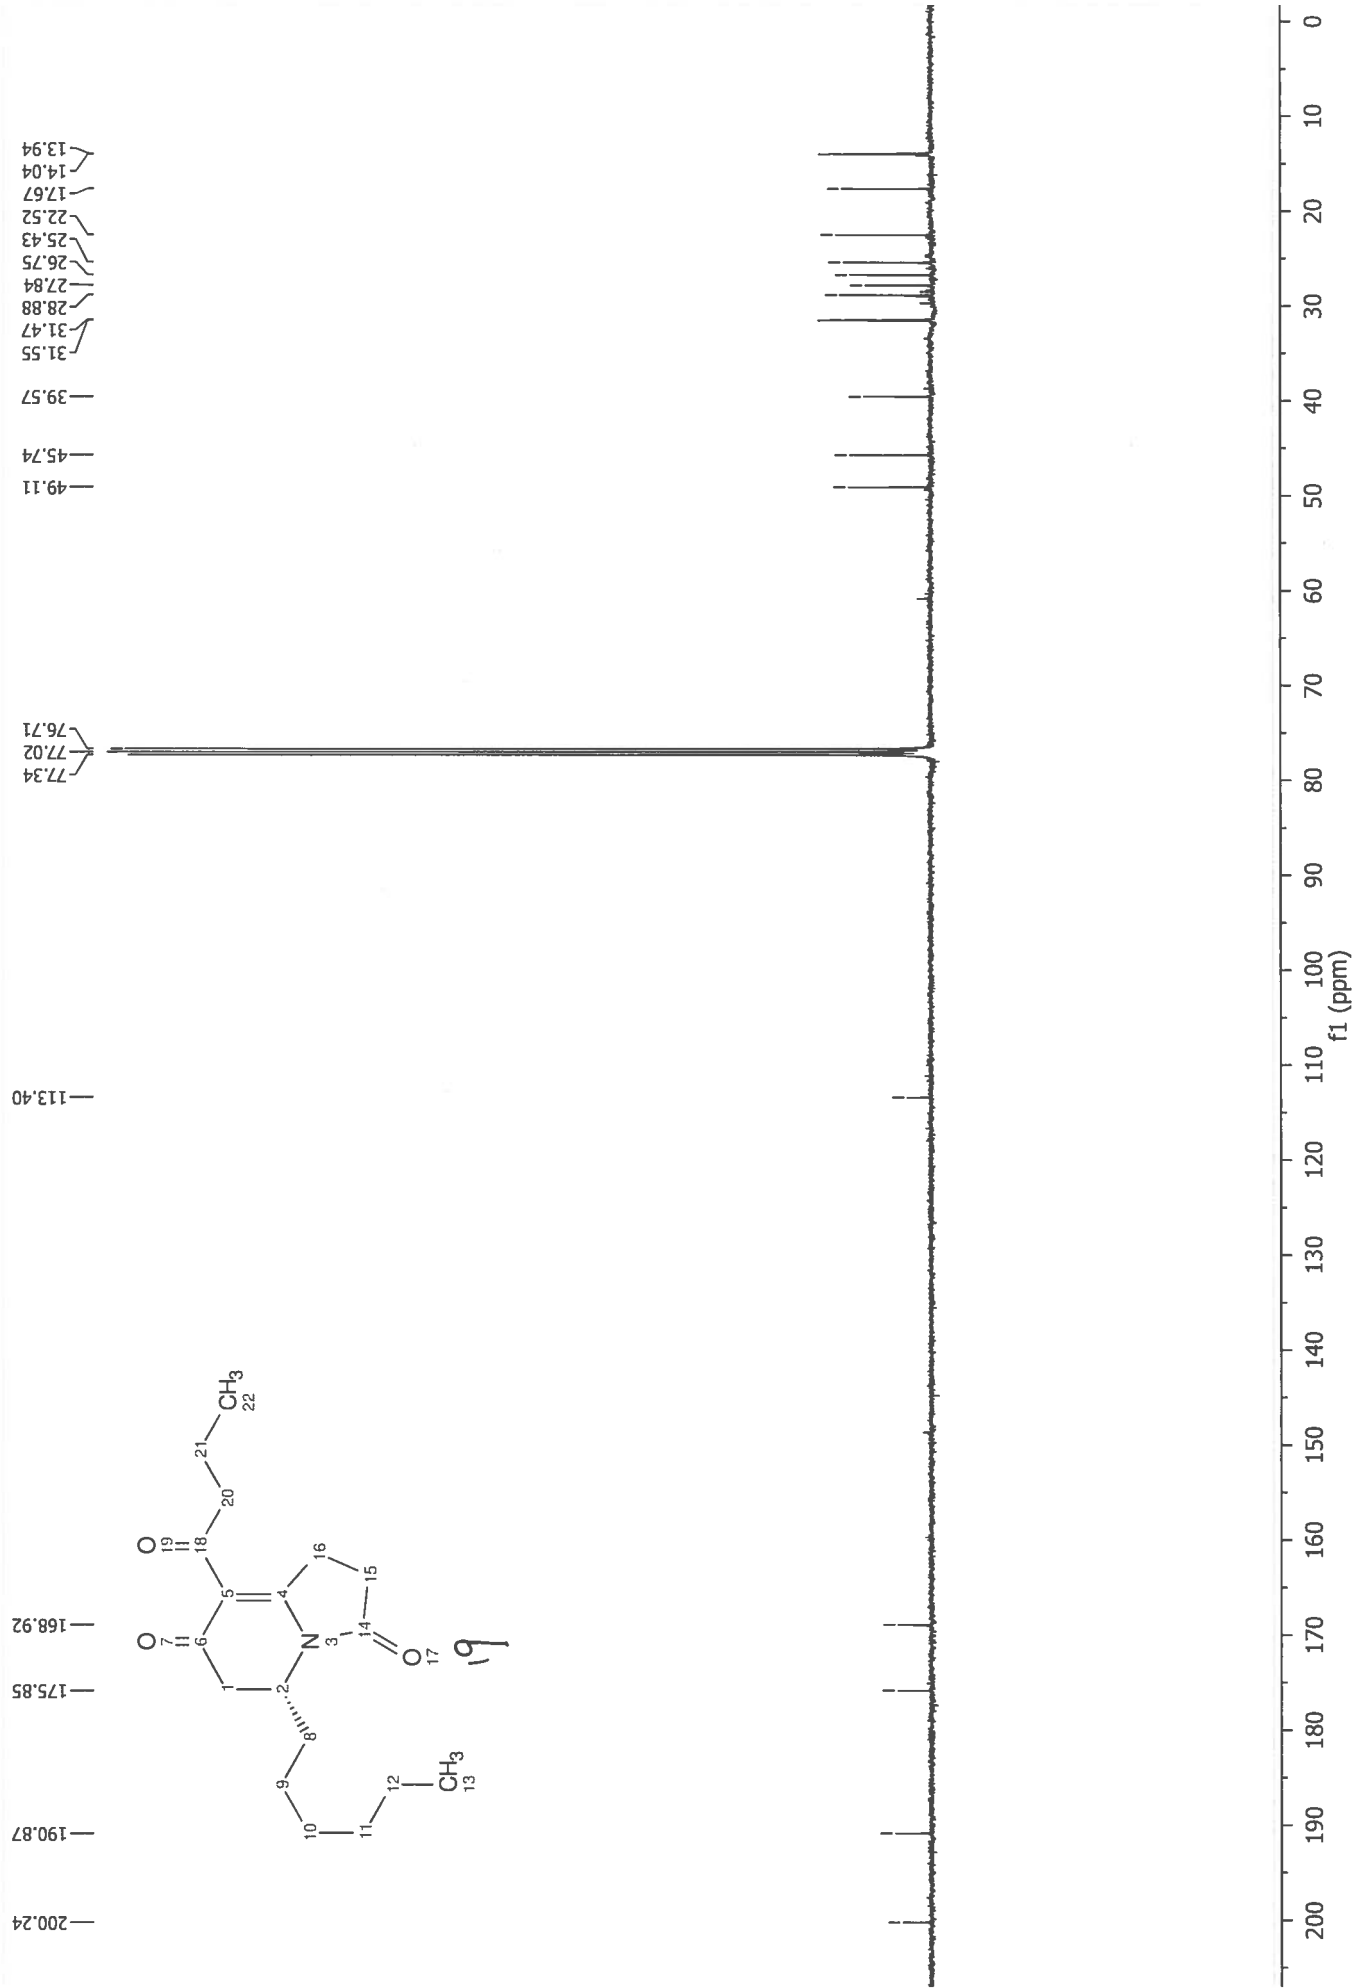

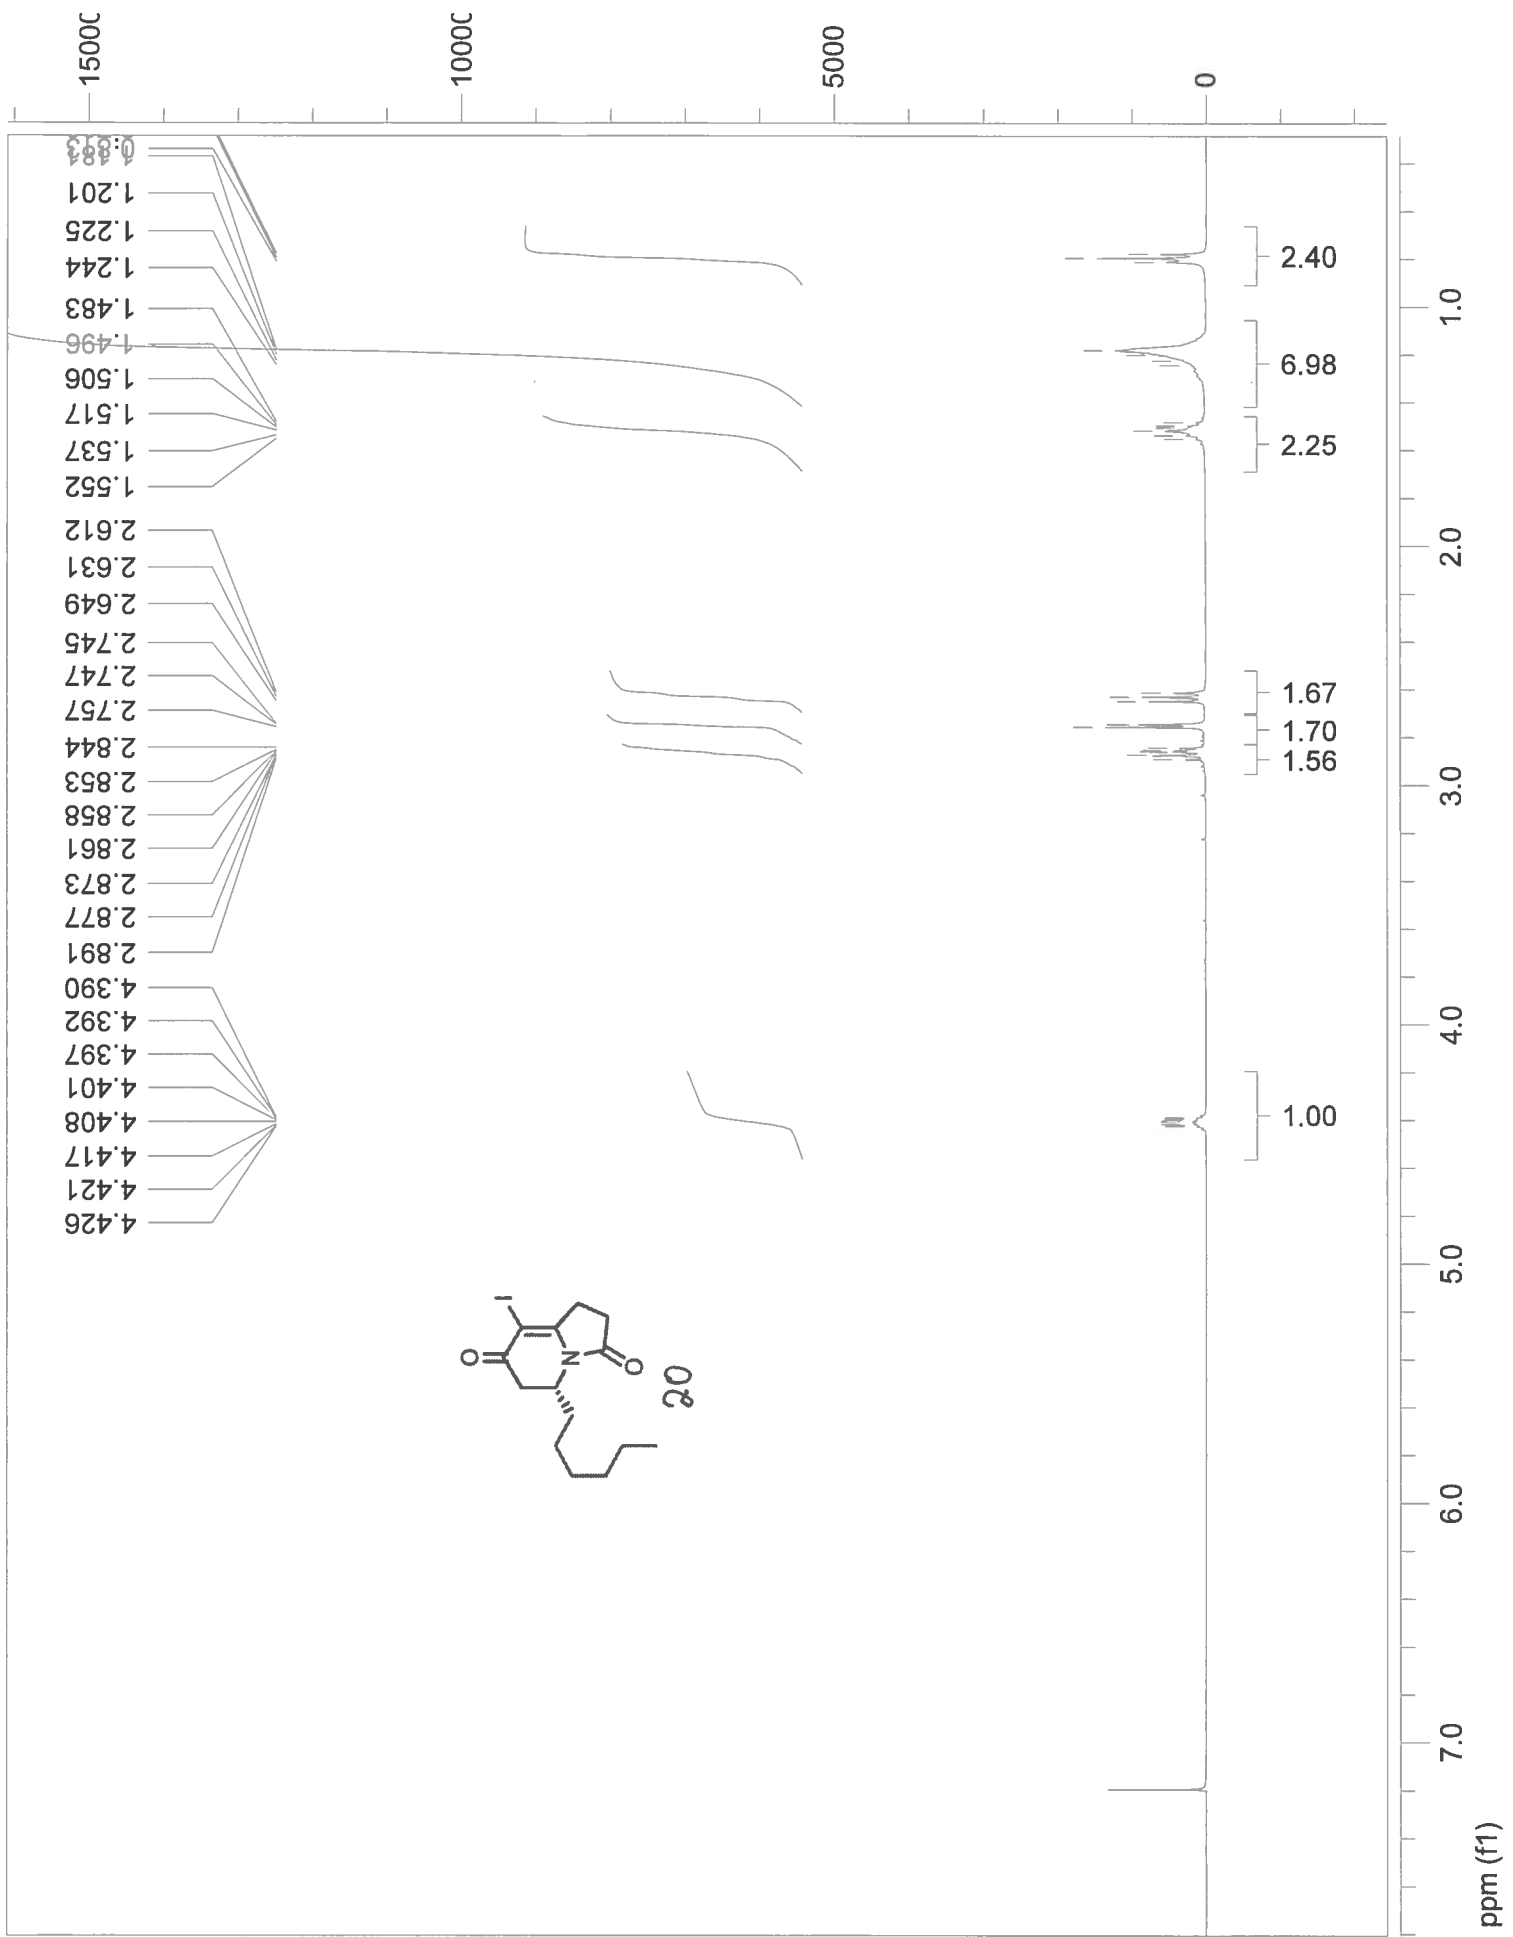

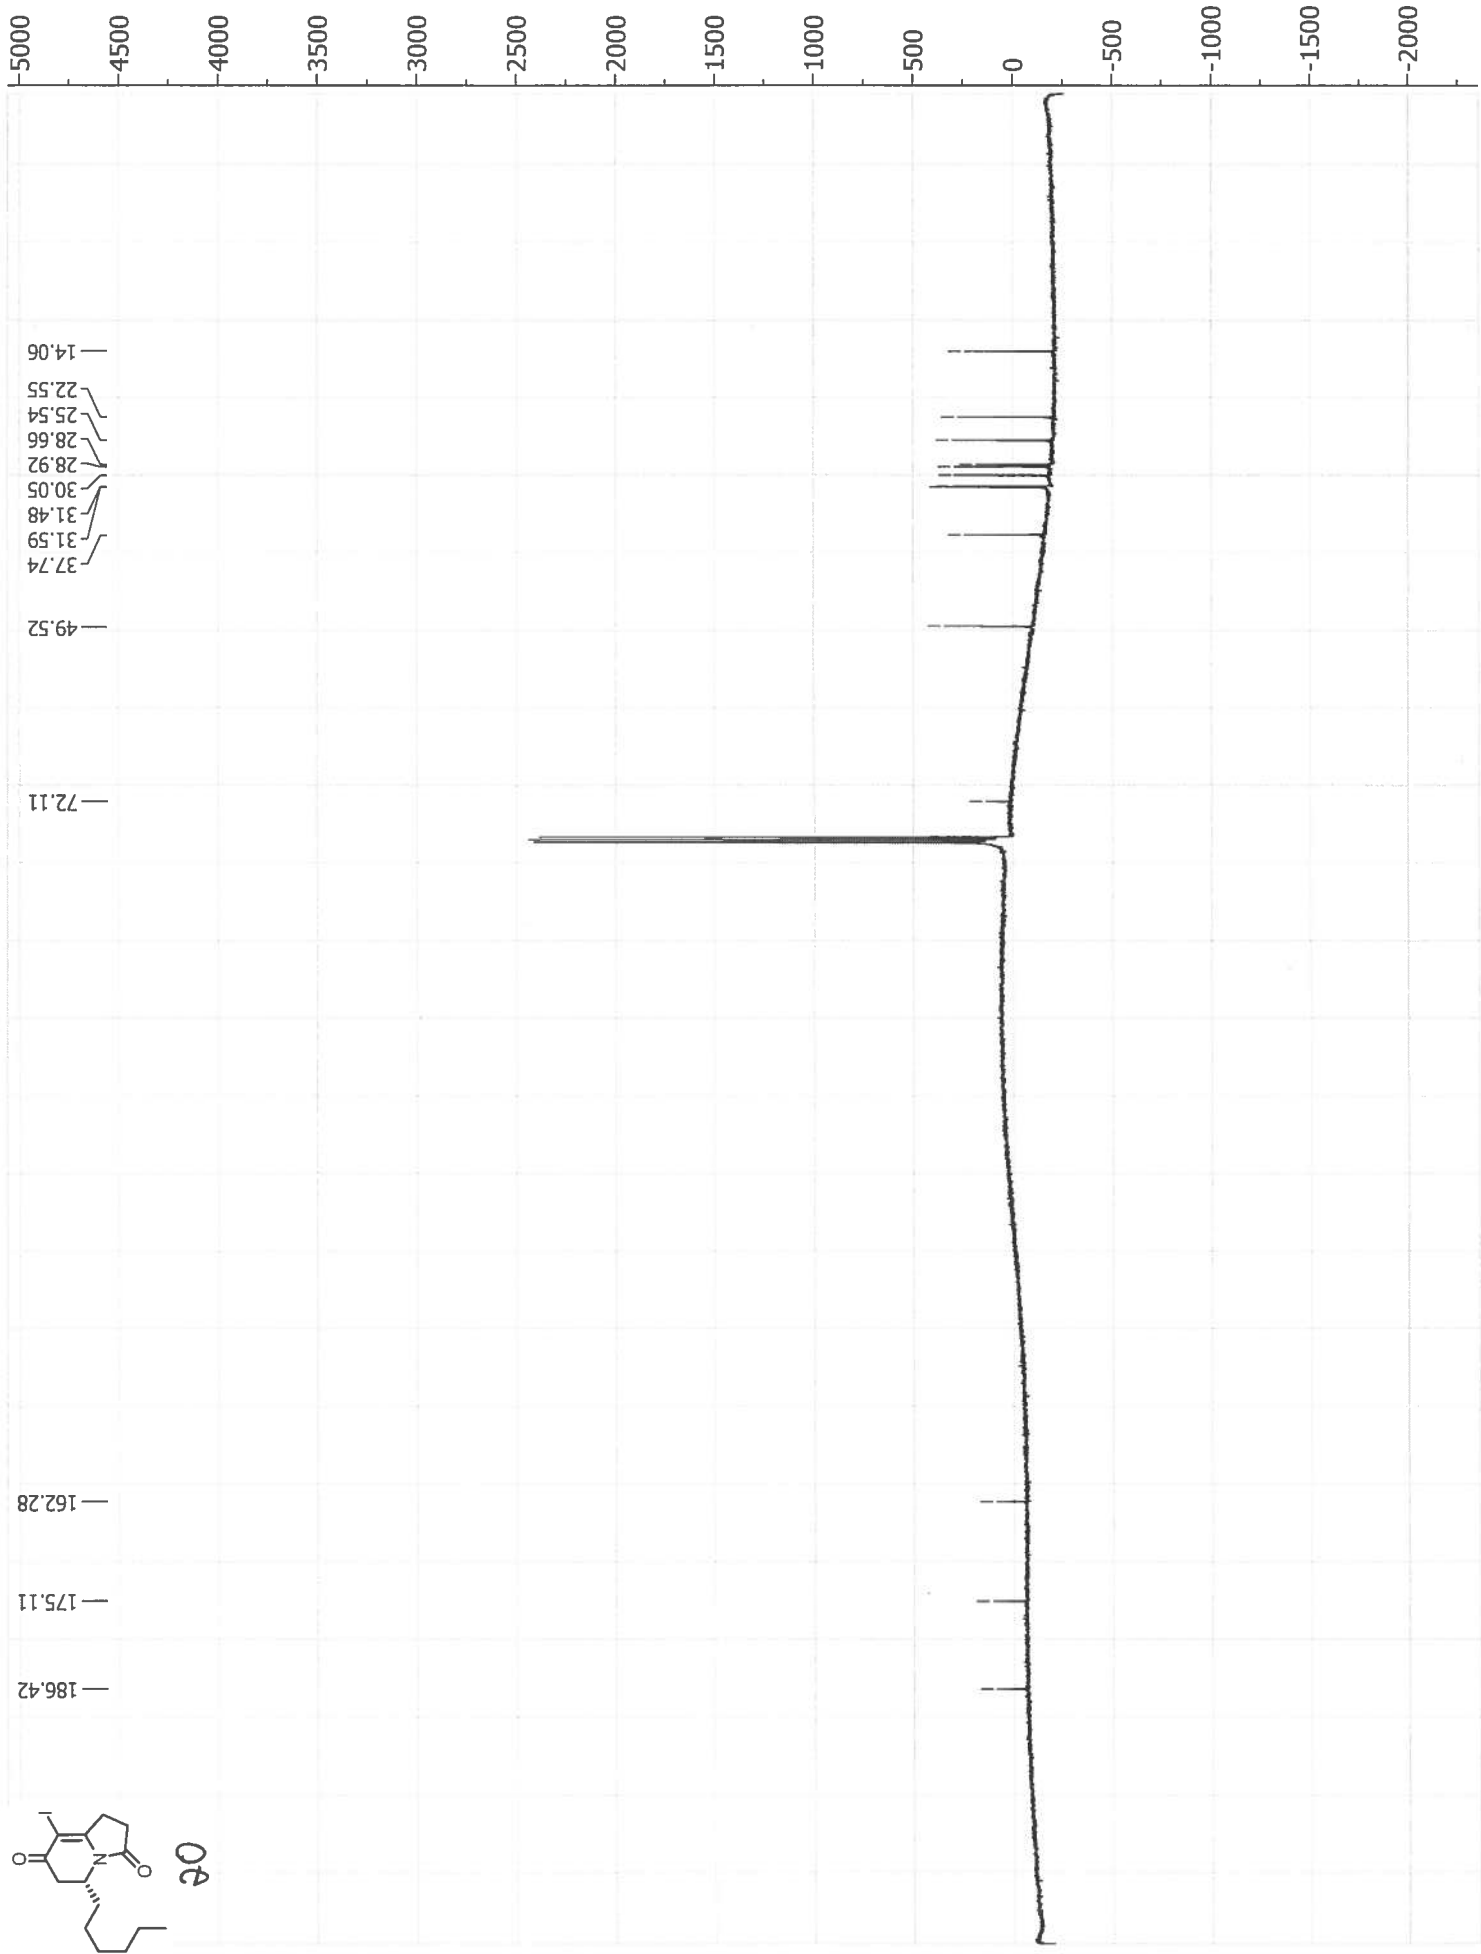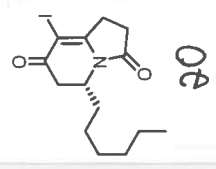

WV-10-vc-82.3.fid

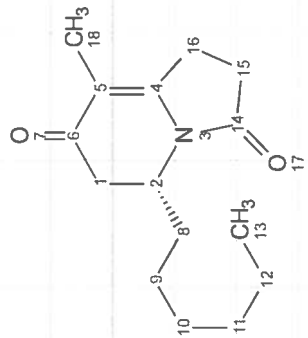

1e

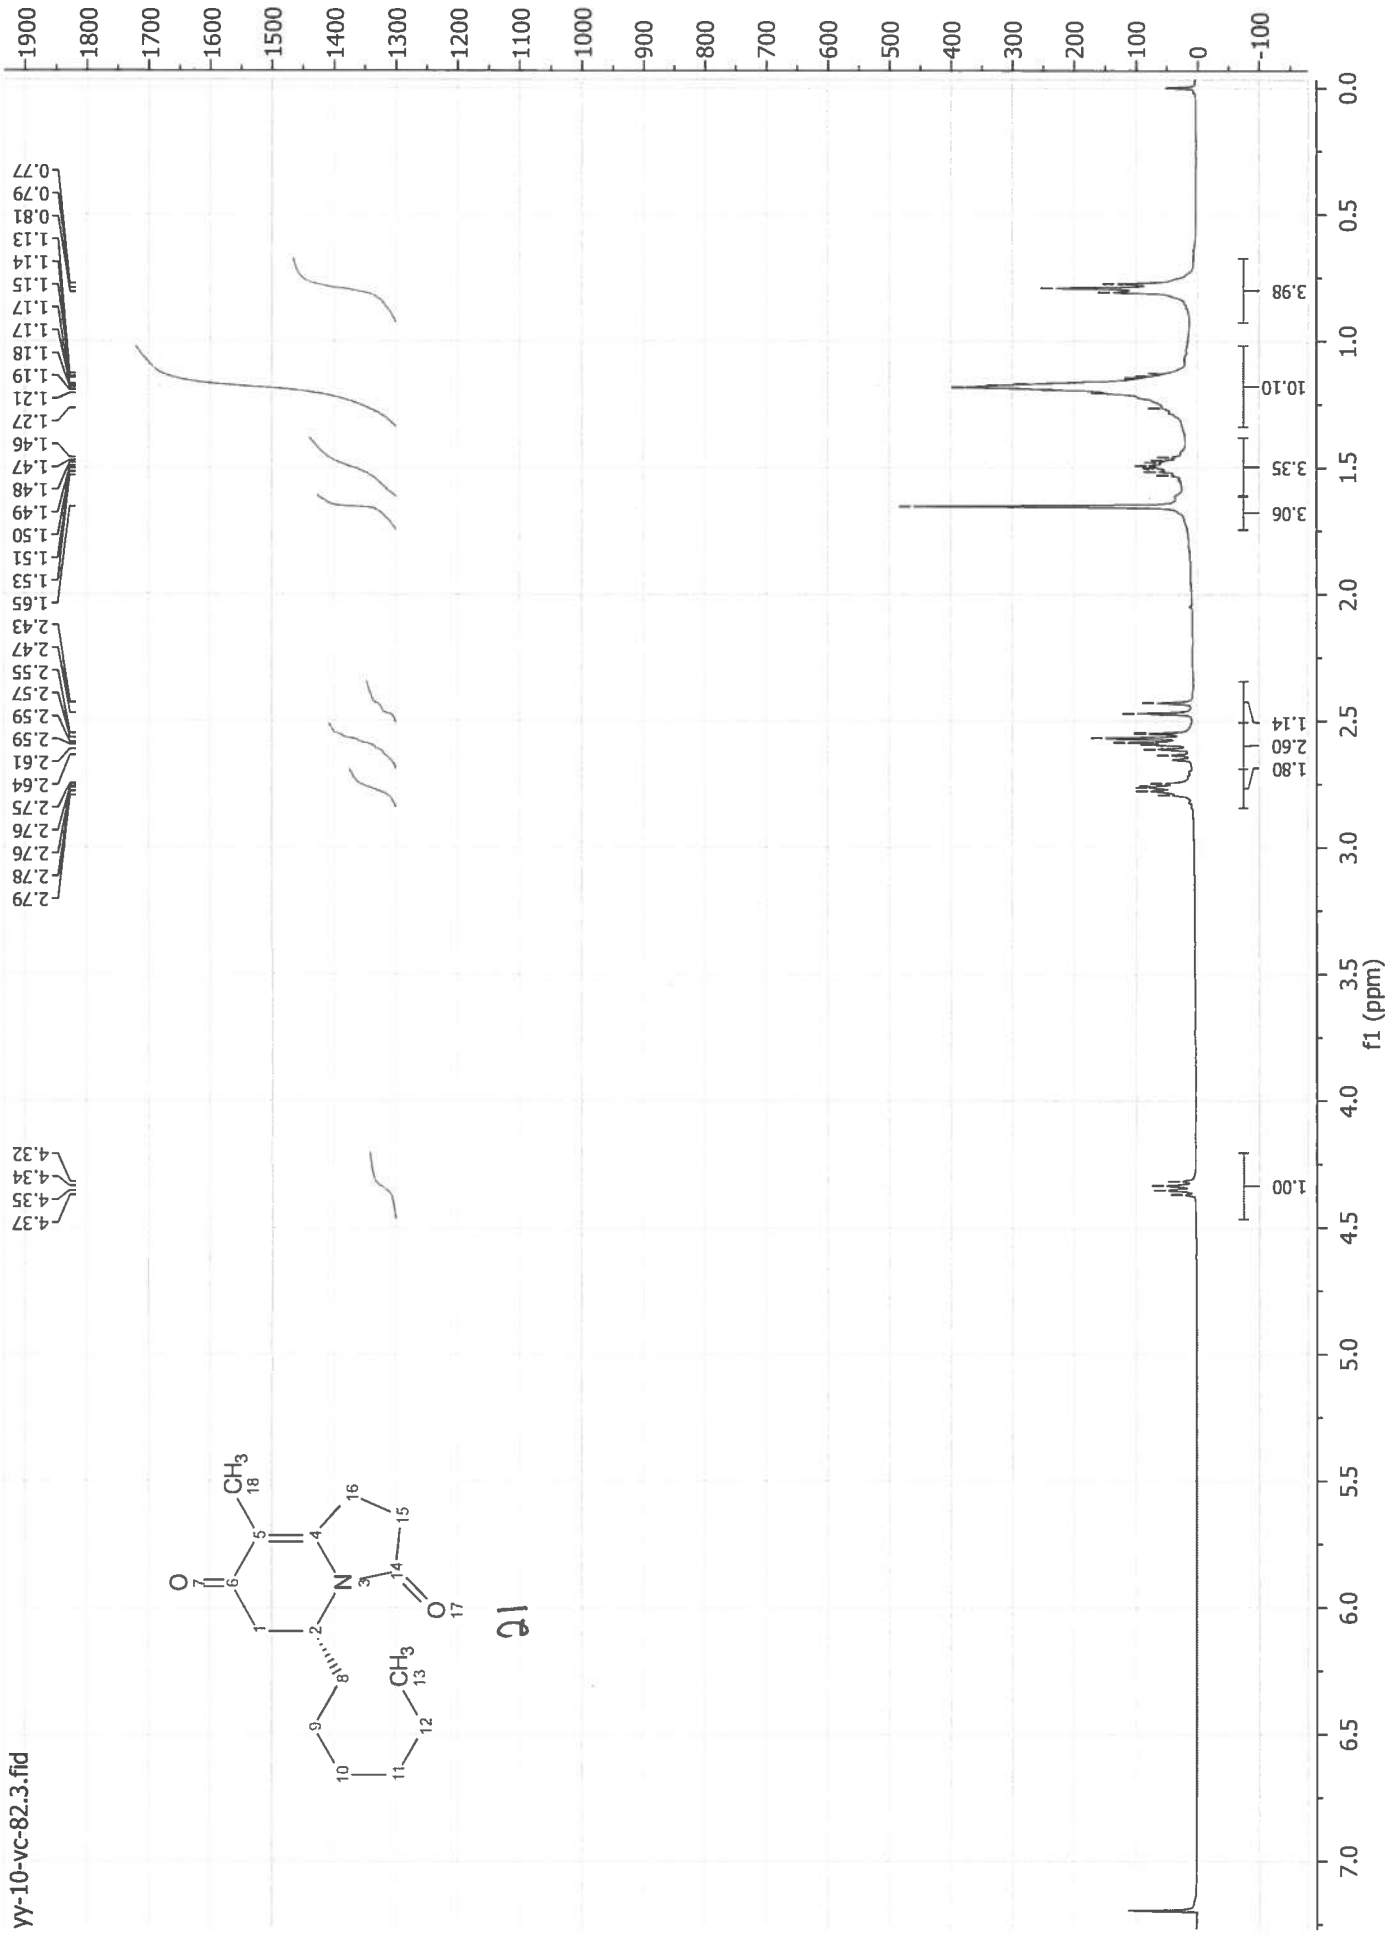

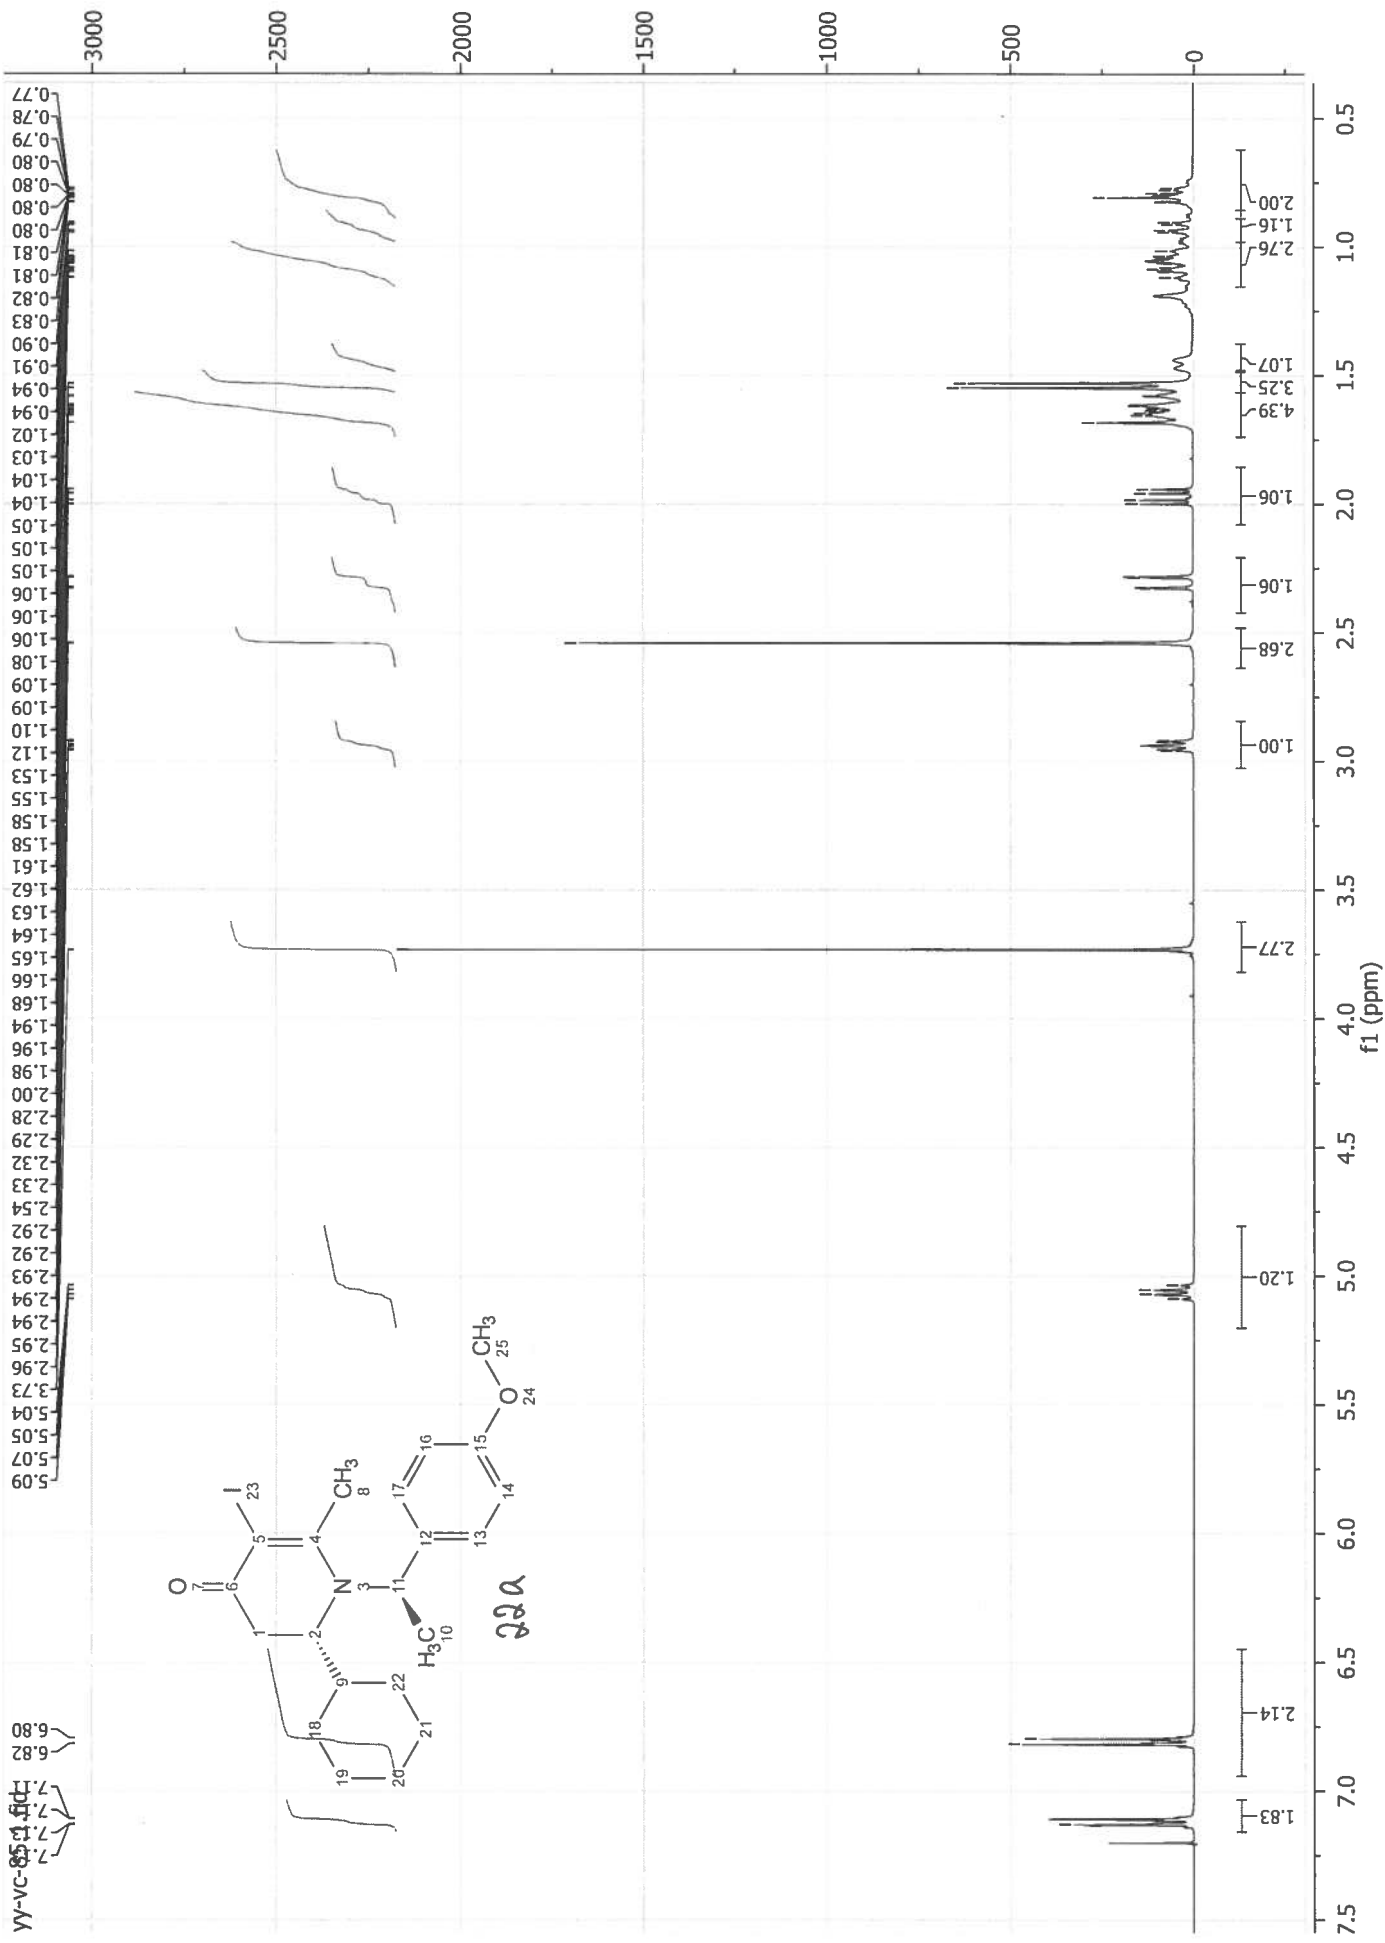

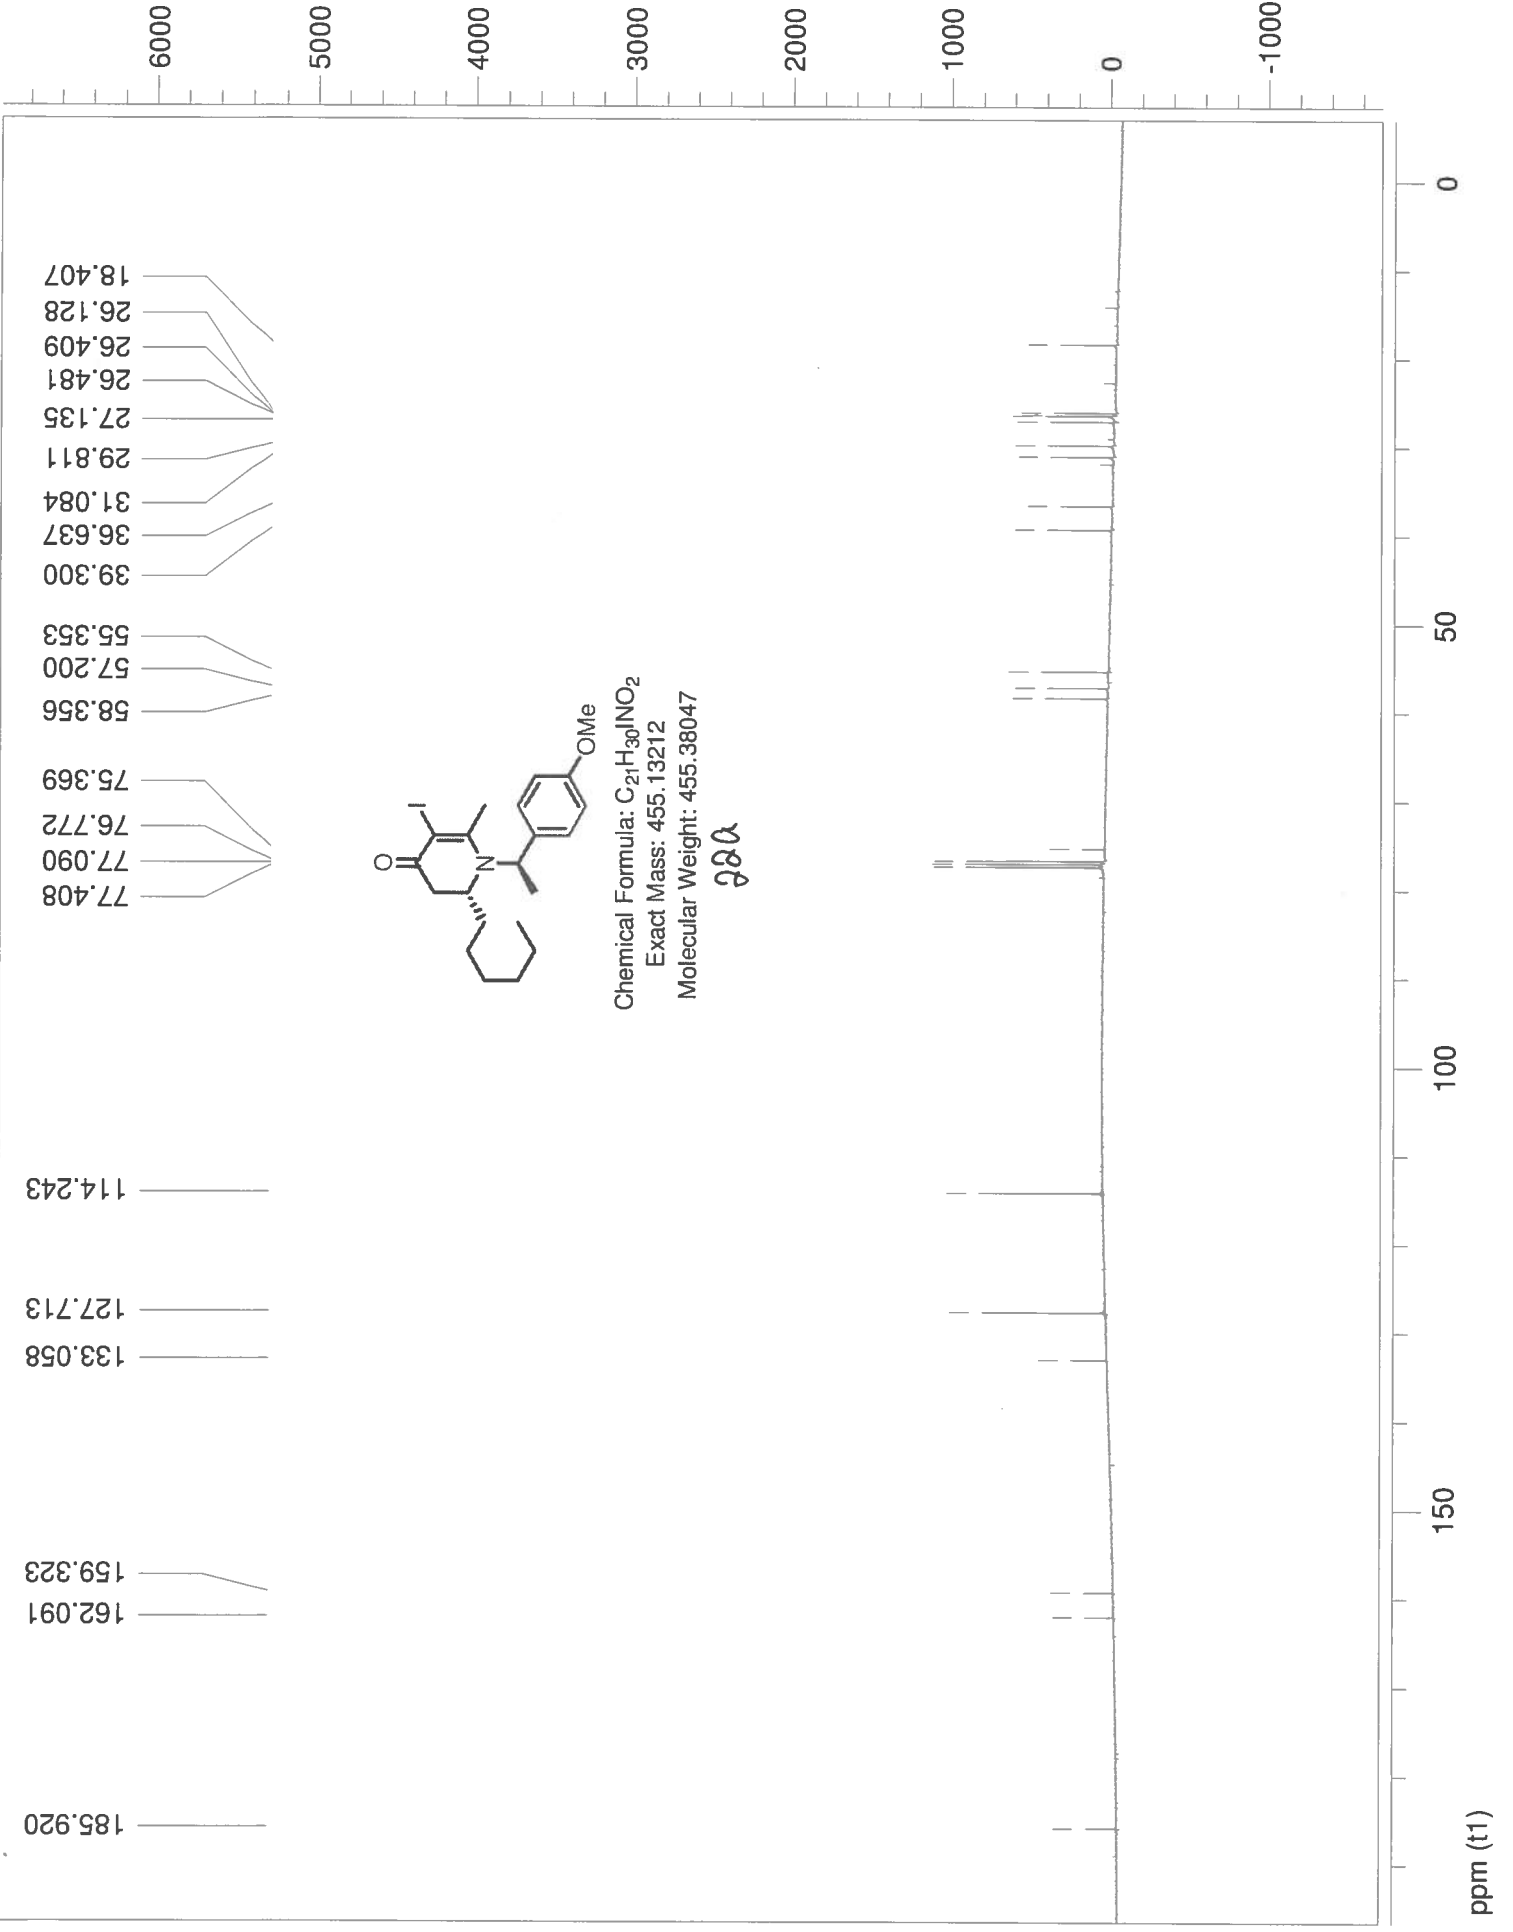

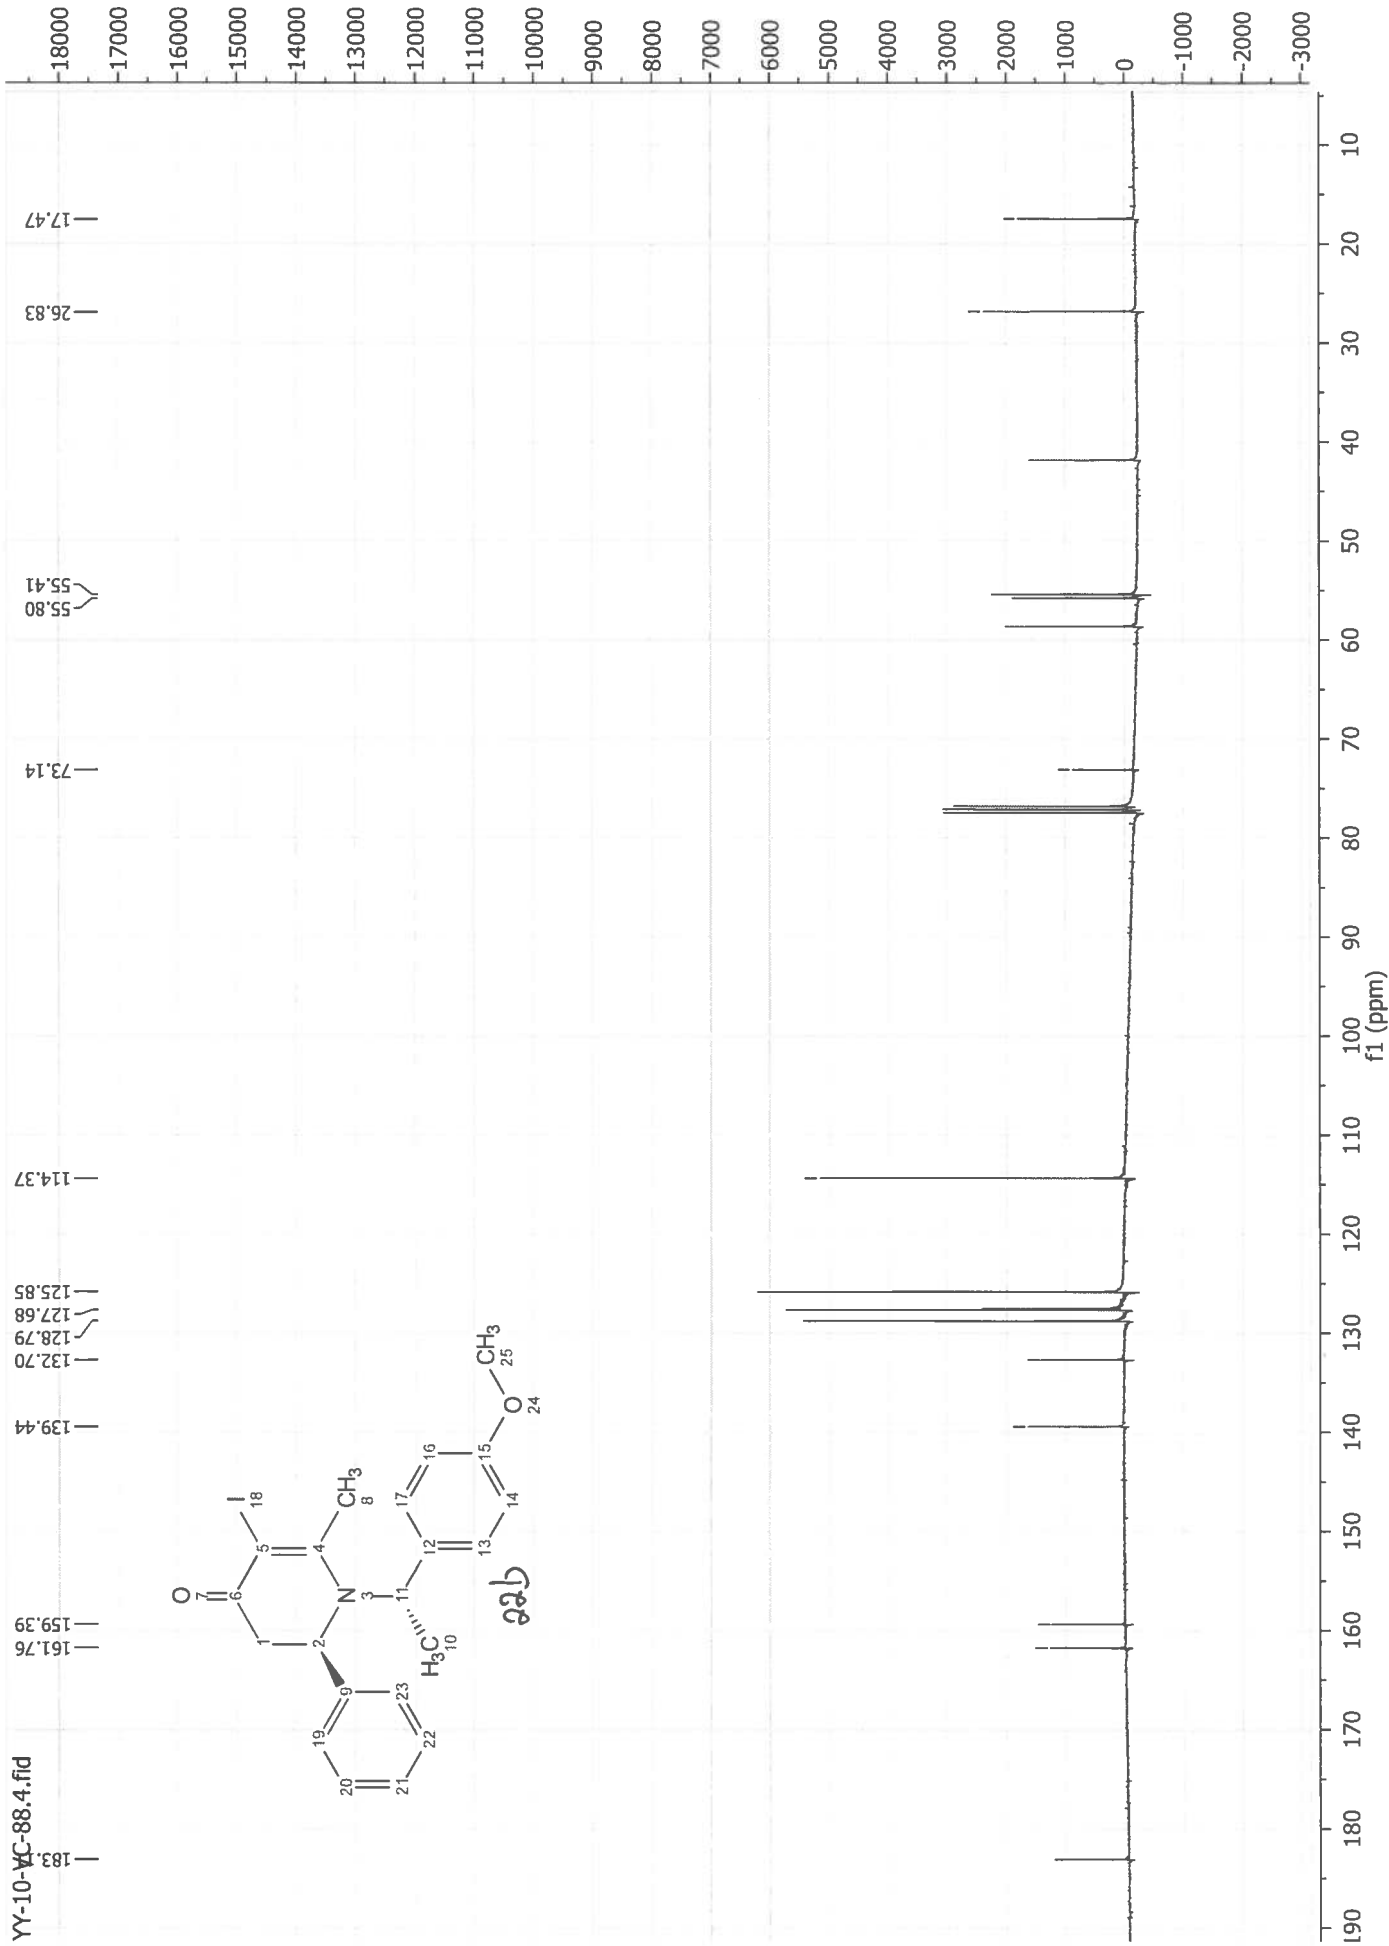

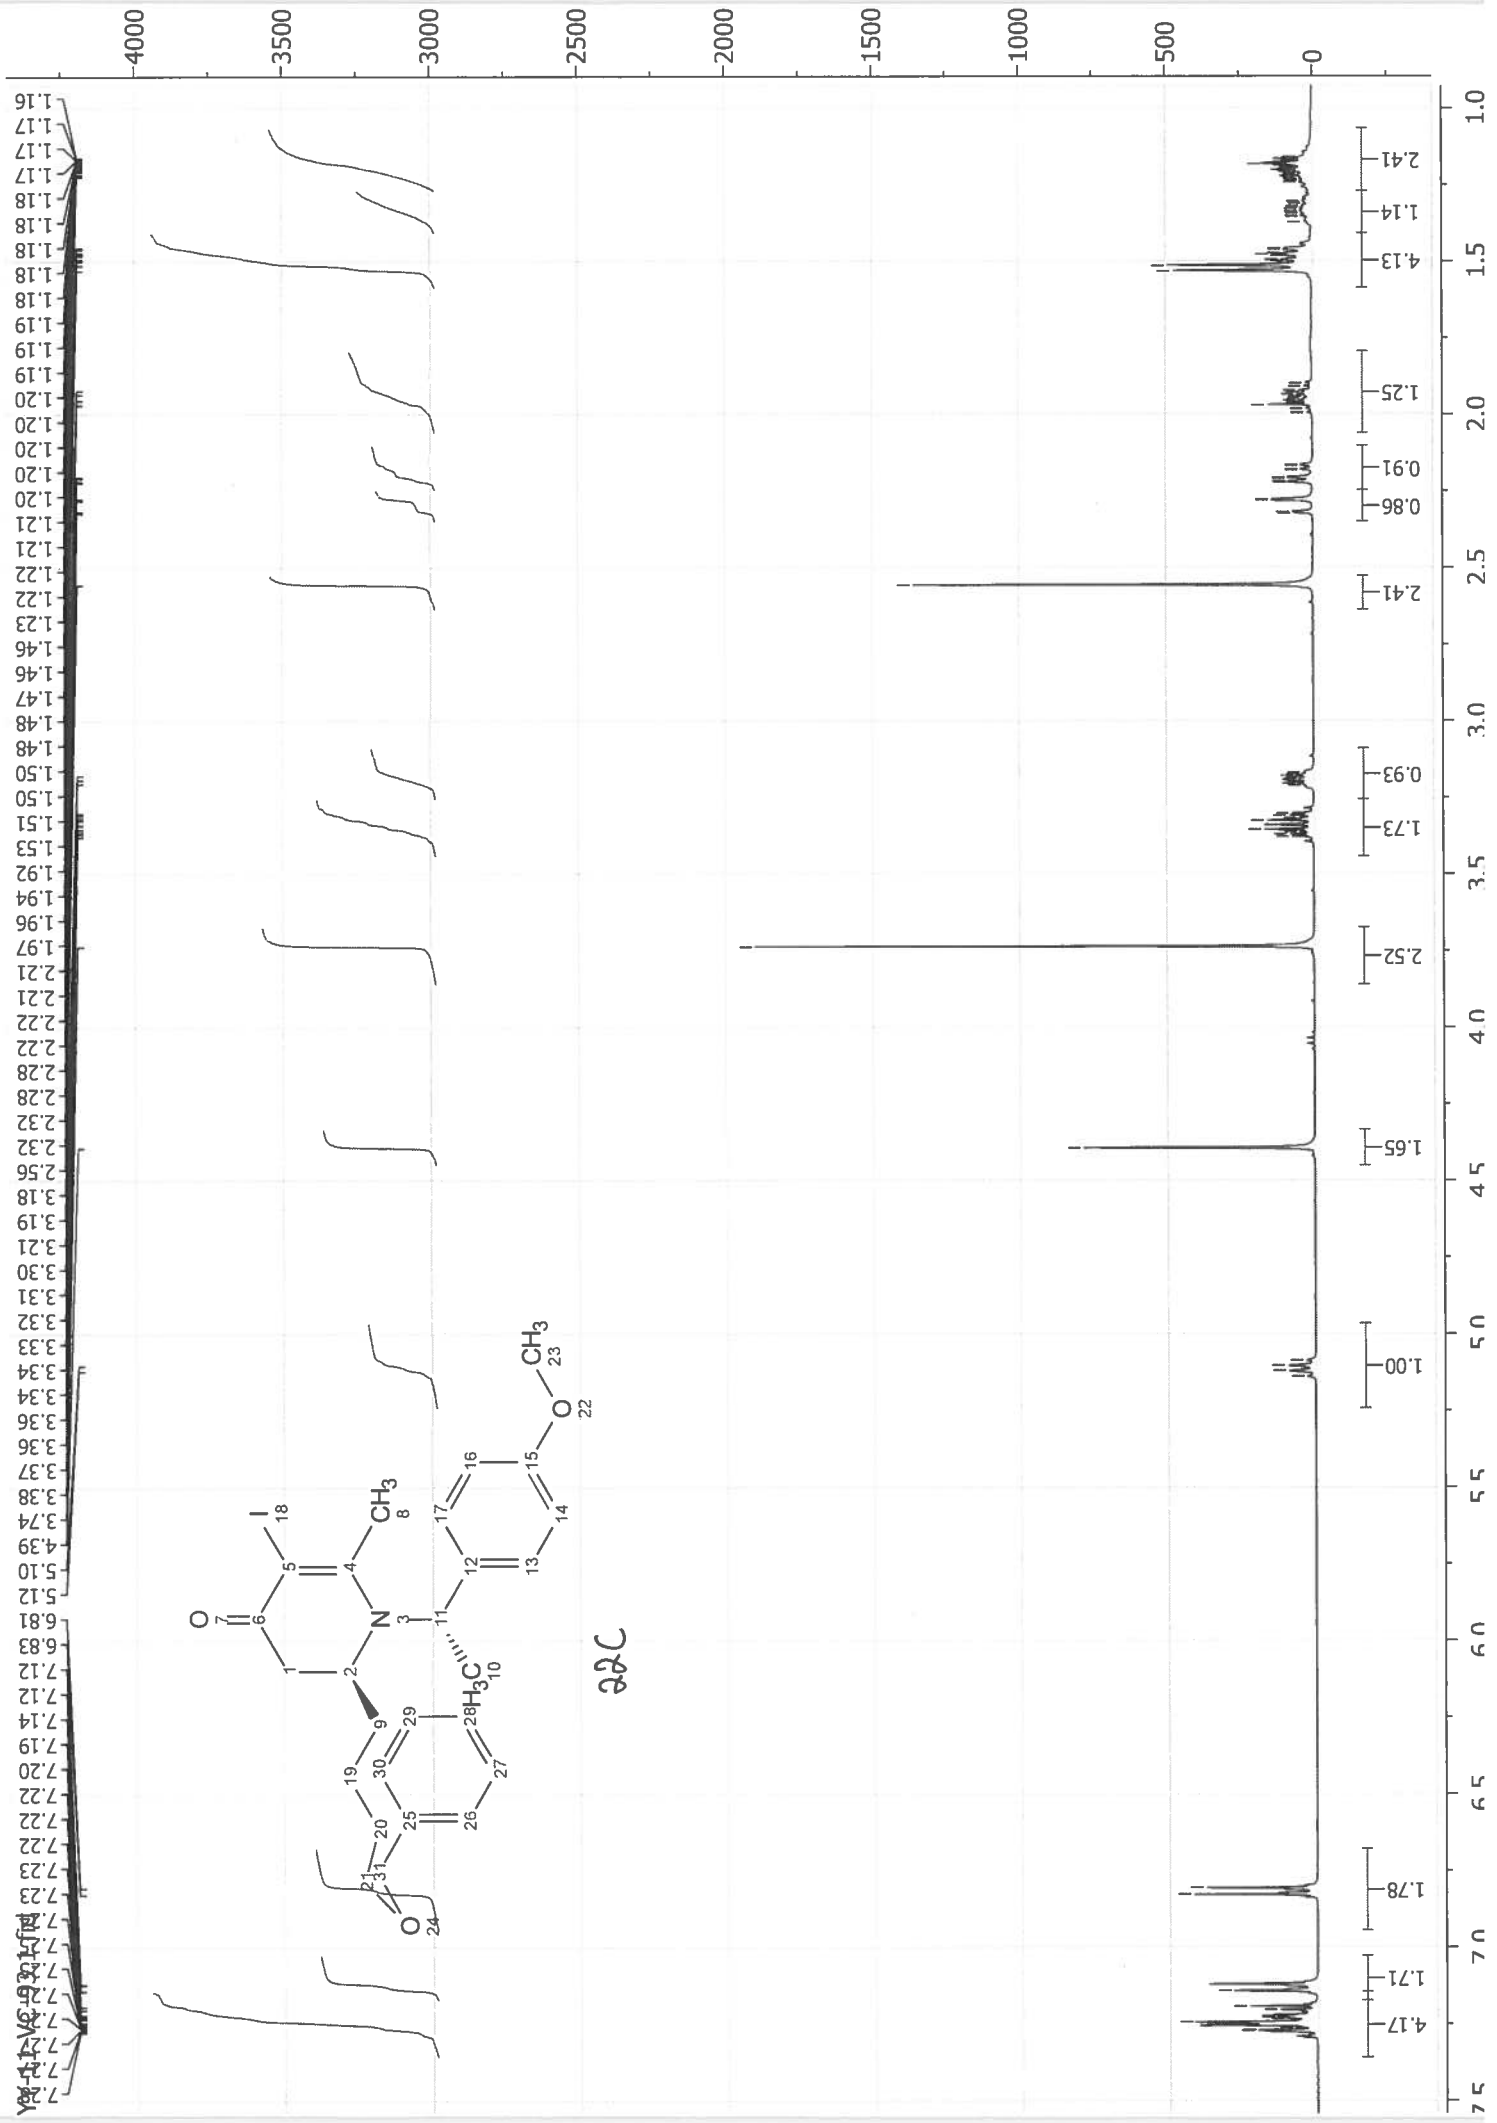

22C



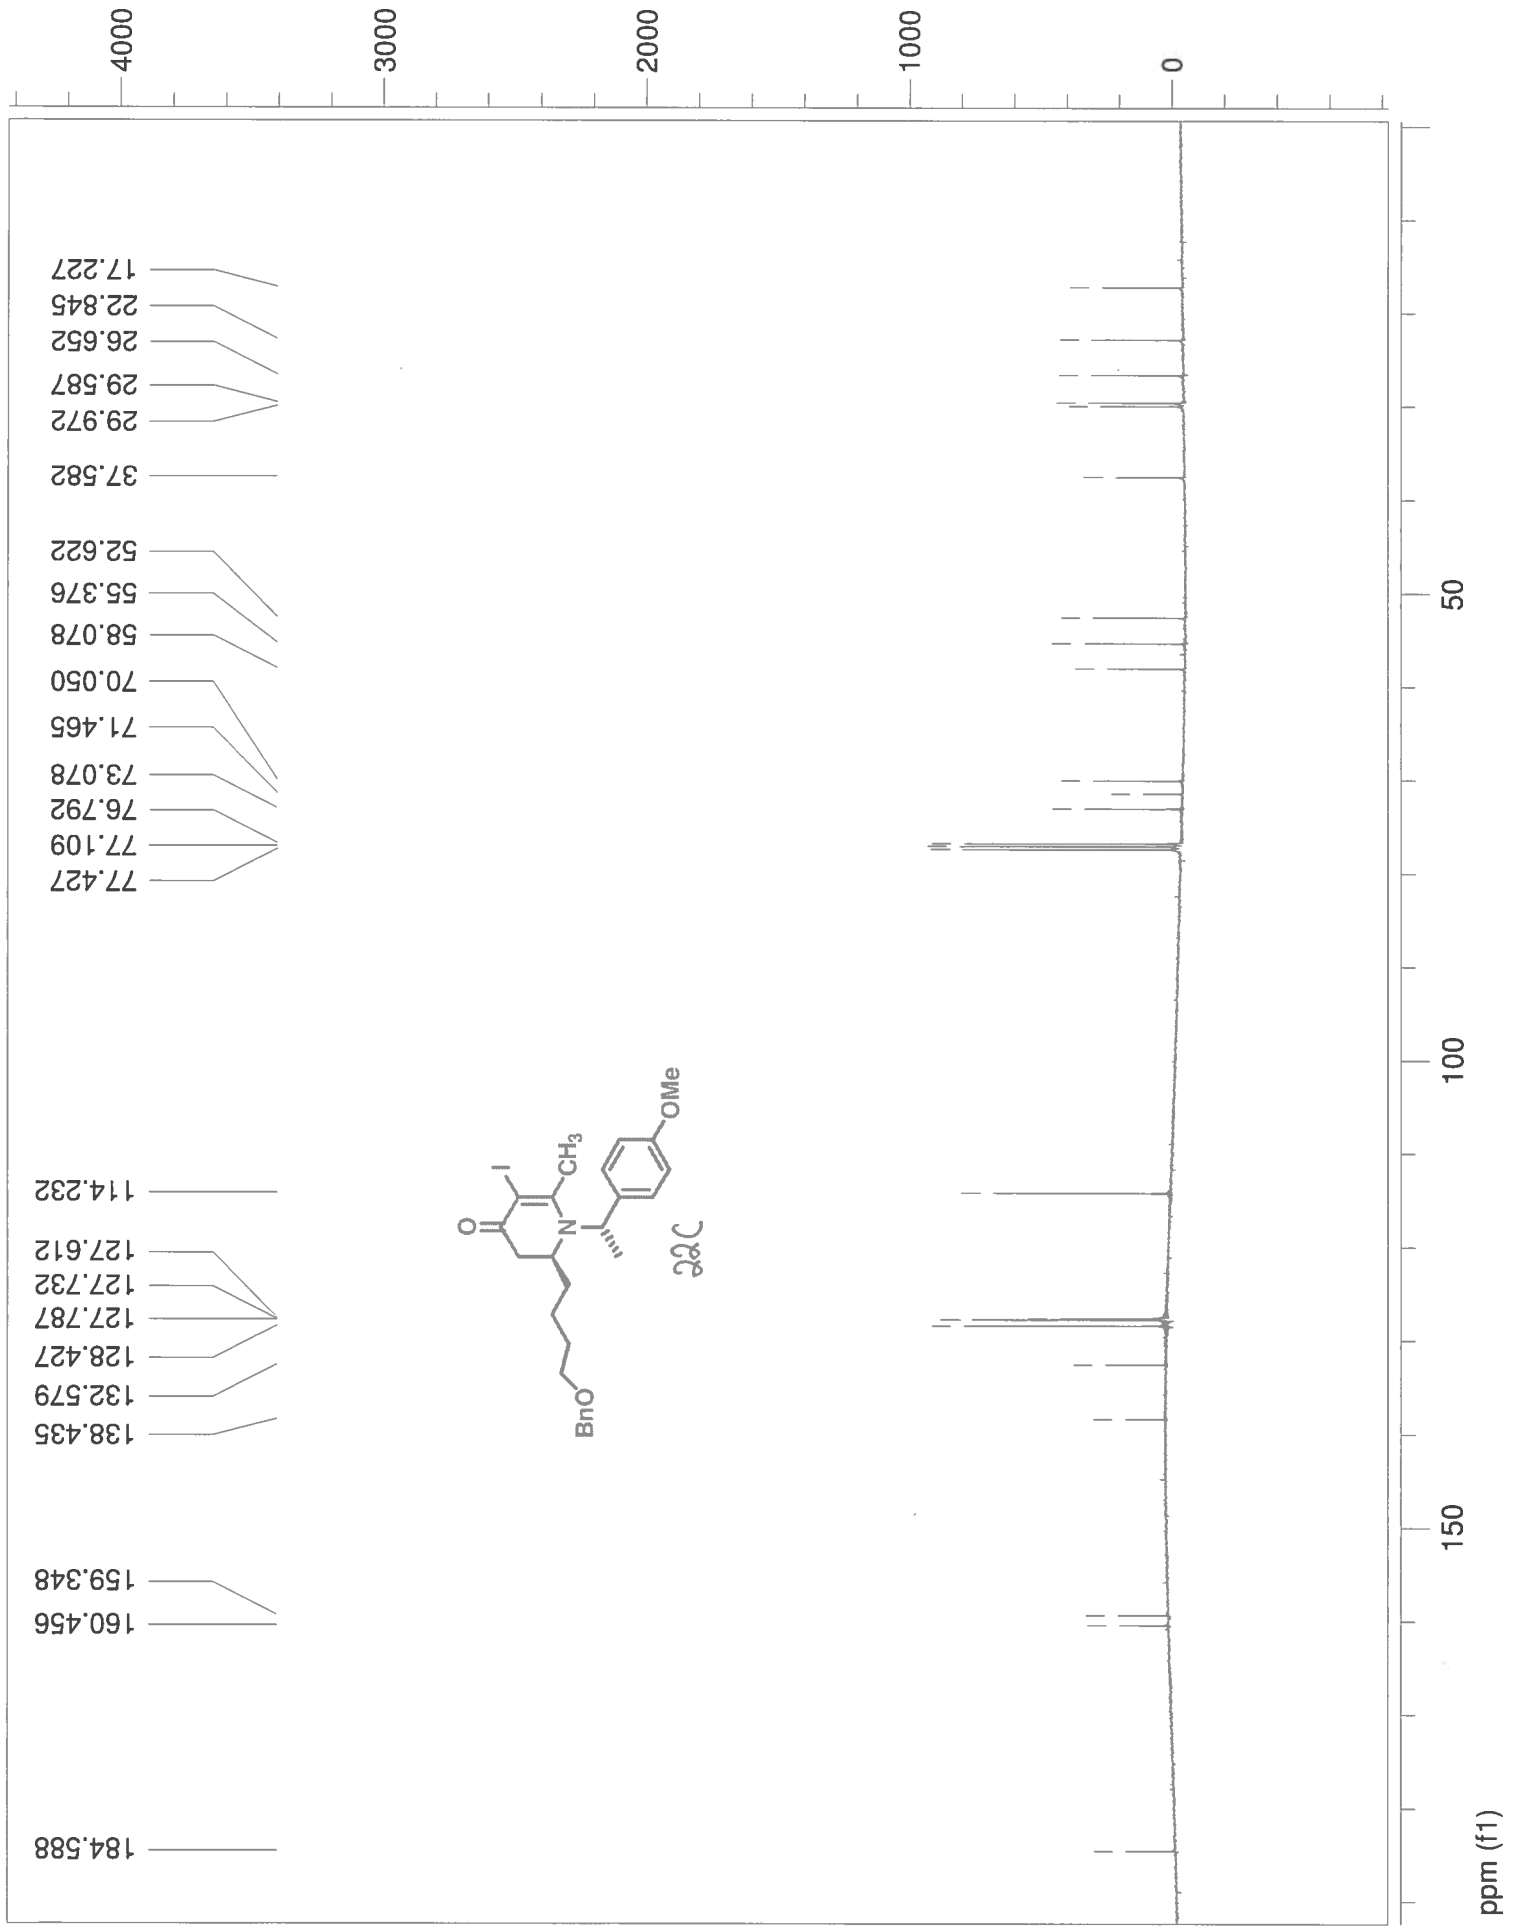

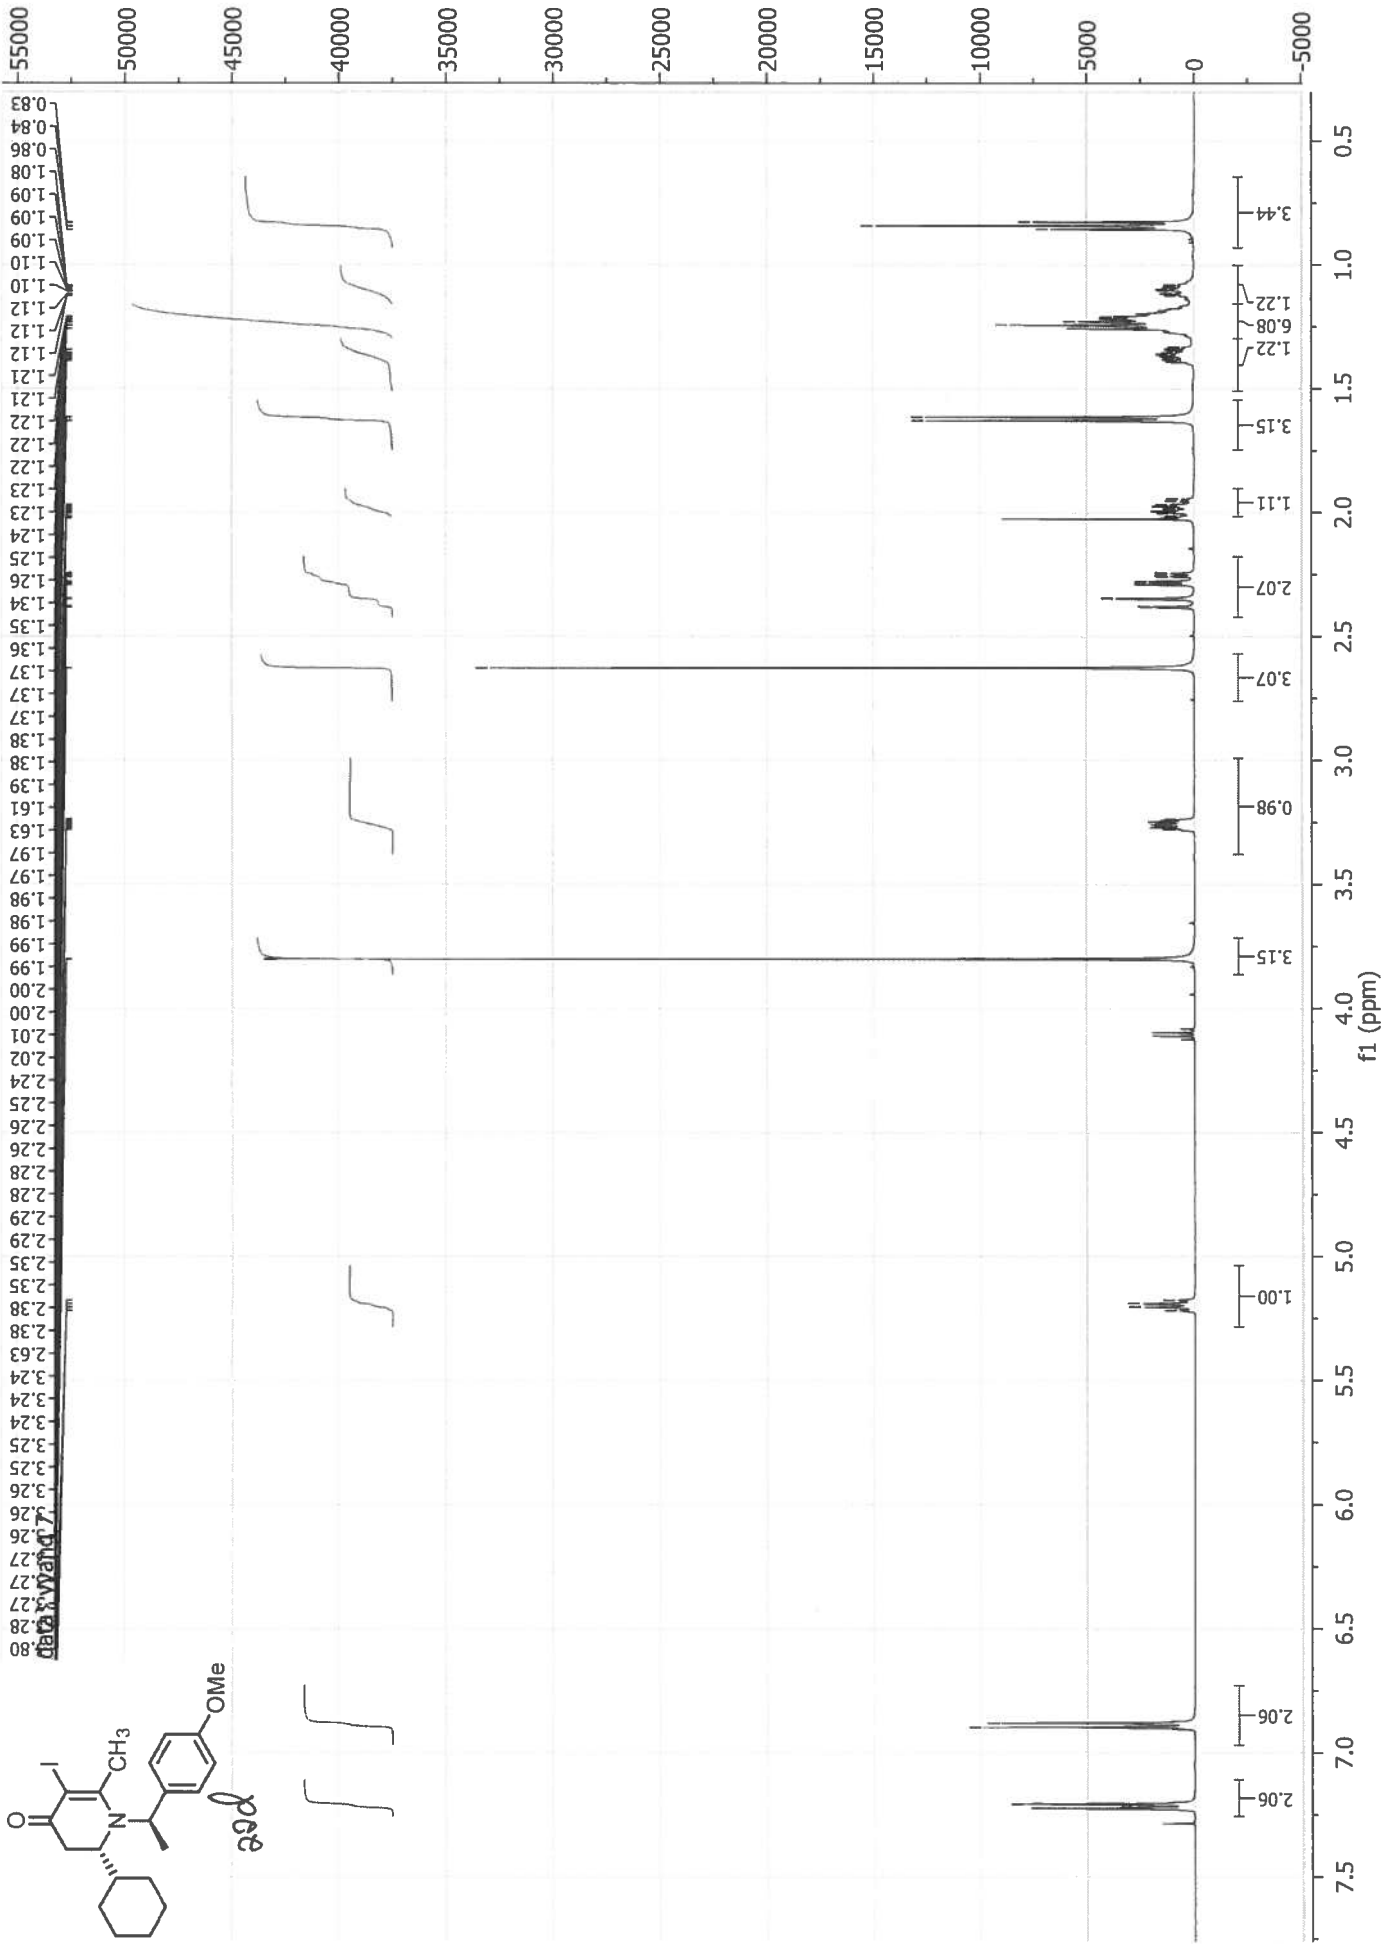

0.83  
0.84  
0.86  
1.08  
1.09  
1.09  
1.10  
1.10  
1.12  
1.12  
1.12  
1.21  
1.21  
1.22  
1.22  
1.22  
1.23  
1.23  
1.24  
1.25  
1.26  
1.34  
1.35  
1.36  
1.37  
1.37  
1.37  
1.38  
1.39  
1.61  
1.63  
1.97  
1.97  
1.98  
1.98  
1.99  
2.00  
2.00  
2.01  
2.02  
2.24  
2.25  
2.26  
2.26  
2.28  
2.28  
2.29  
2.29  
2.35  
2.35  
2.38  
2.38  
2.63  
3.24  
3.24  
3.24  
3.25  
3.25  
3.26  
3.26  
3.26  
3.27  
3.27  
3.28  
3.28  
3.80

0.5  
1.0  
1.5  
2.0  
2.5  
3.0  
3.5  
4.0  
4.5  
5.0  
5.5  
6.0  
6.5  
7.0  
7.5

f1 (ppm)

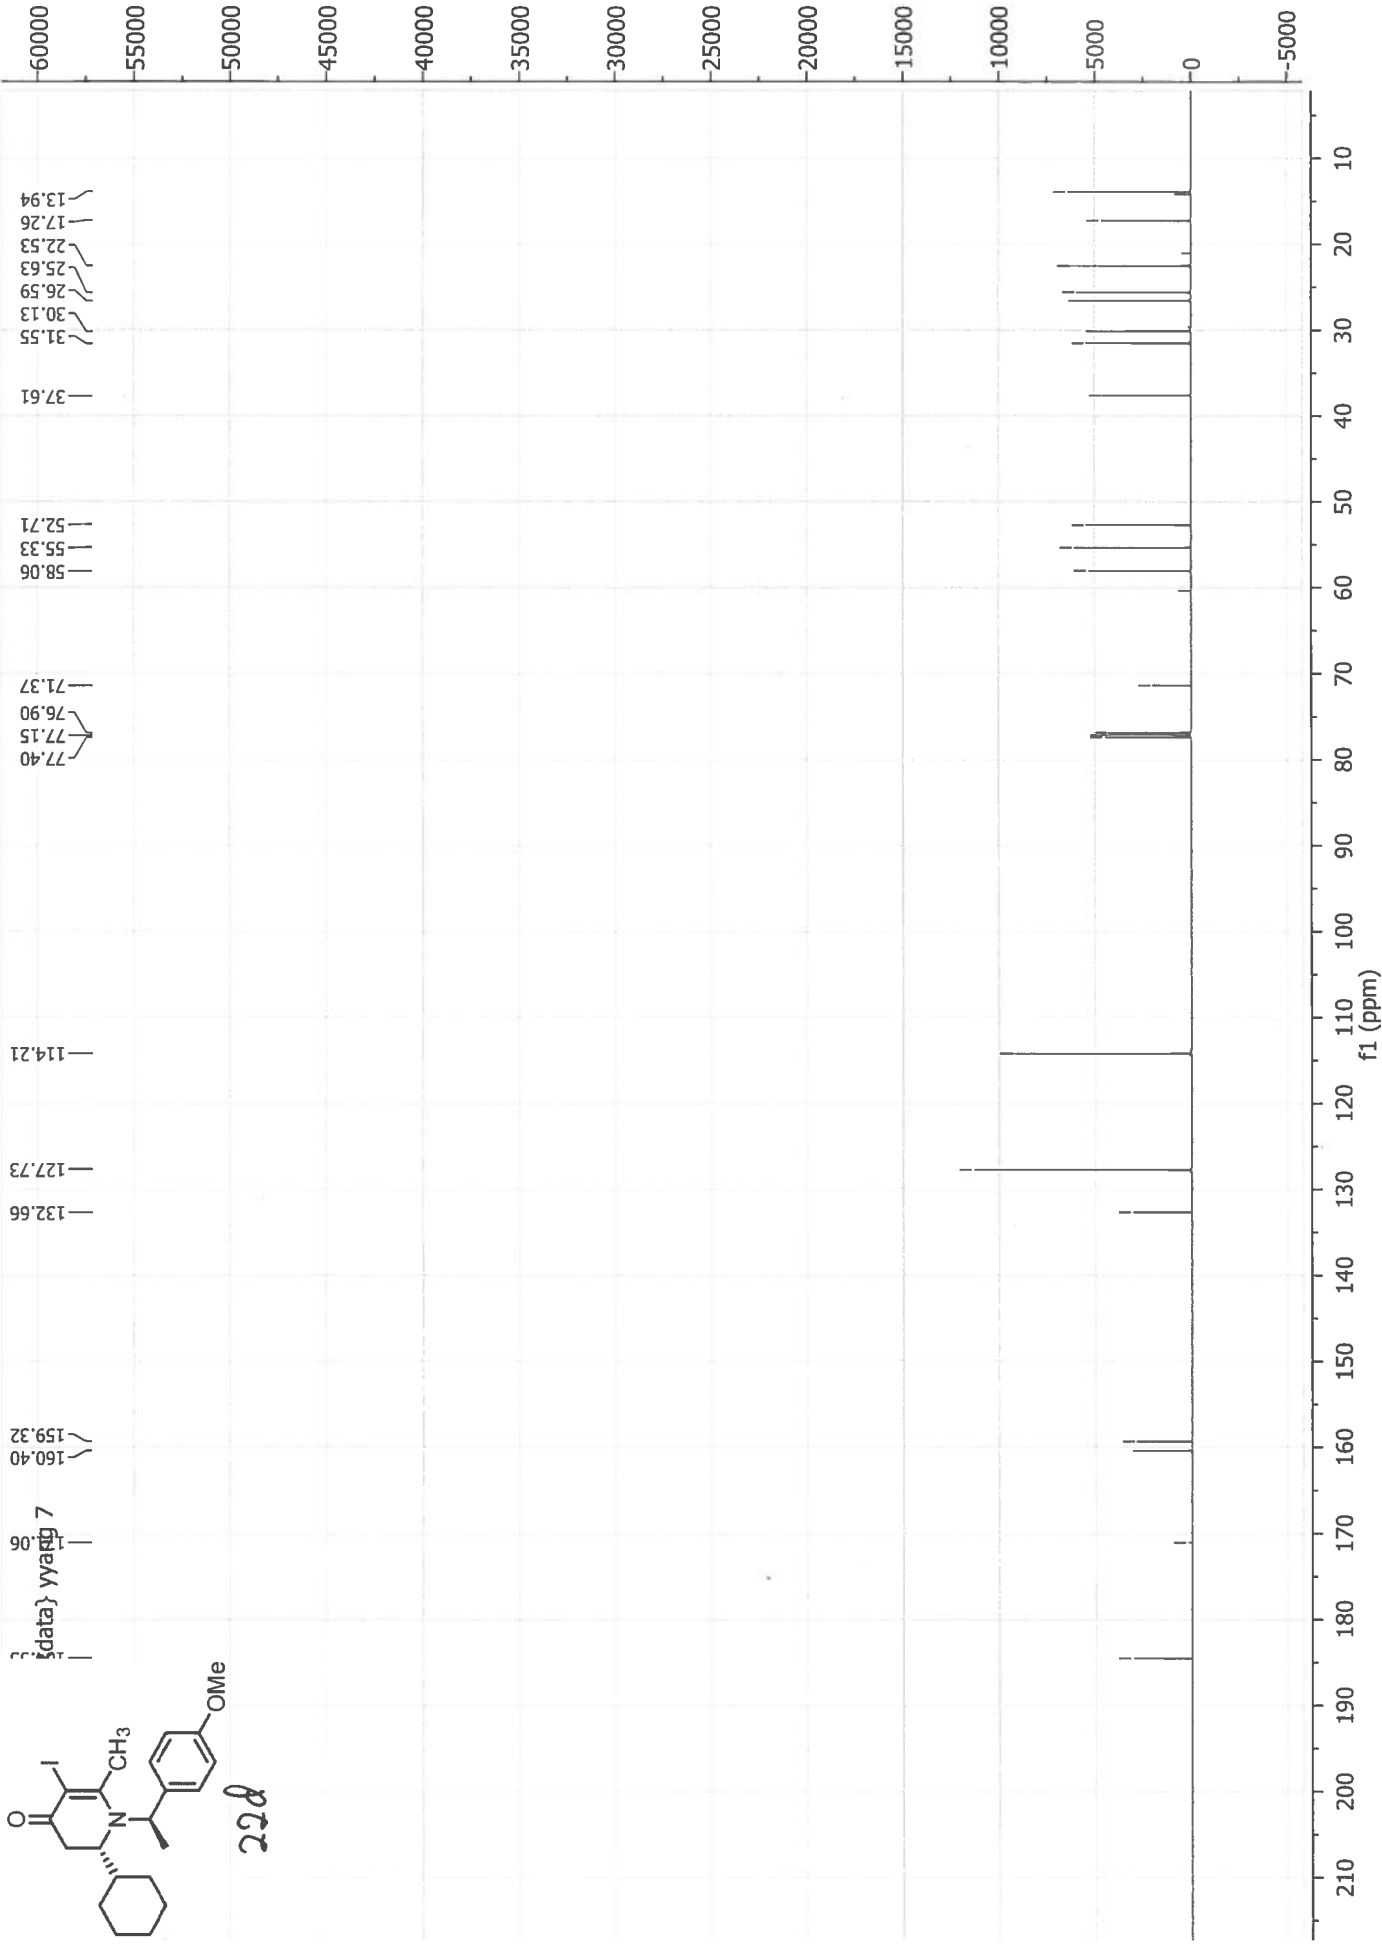

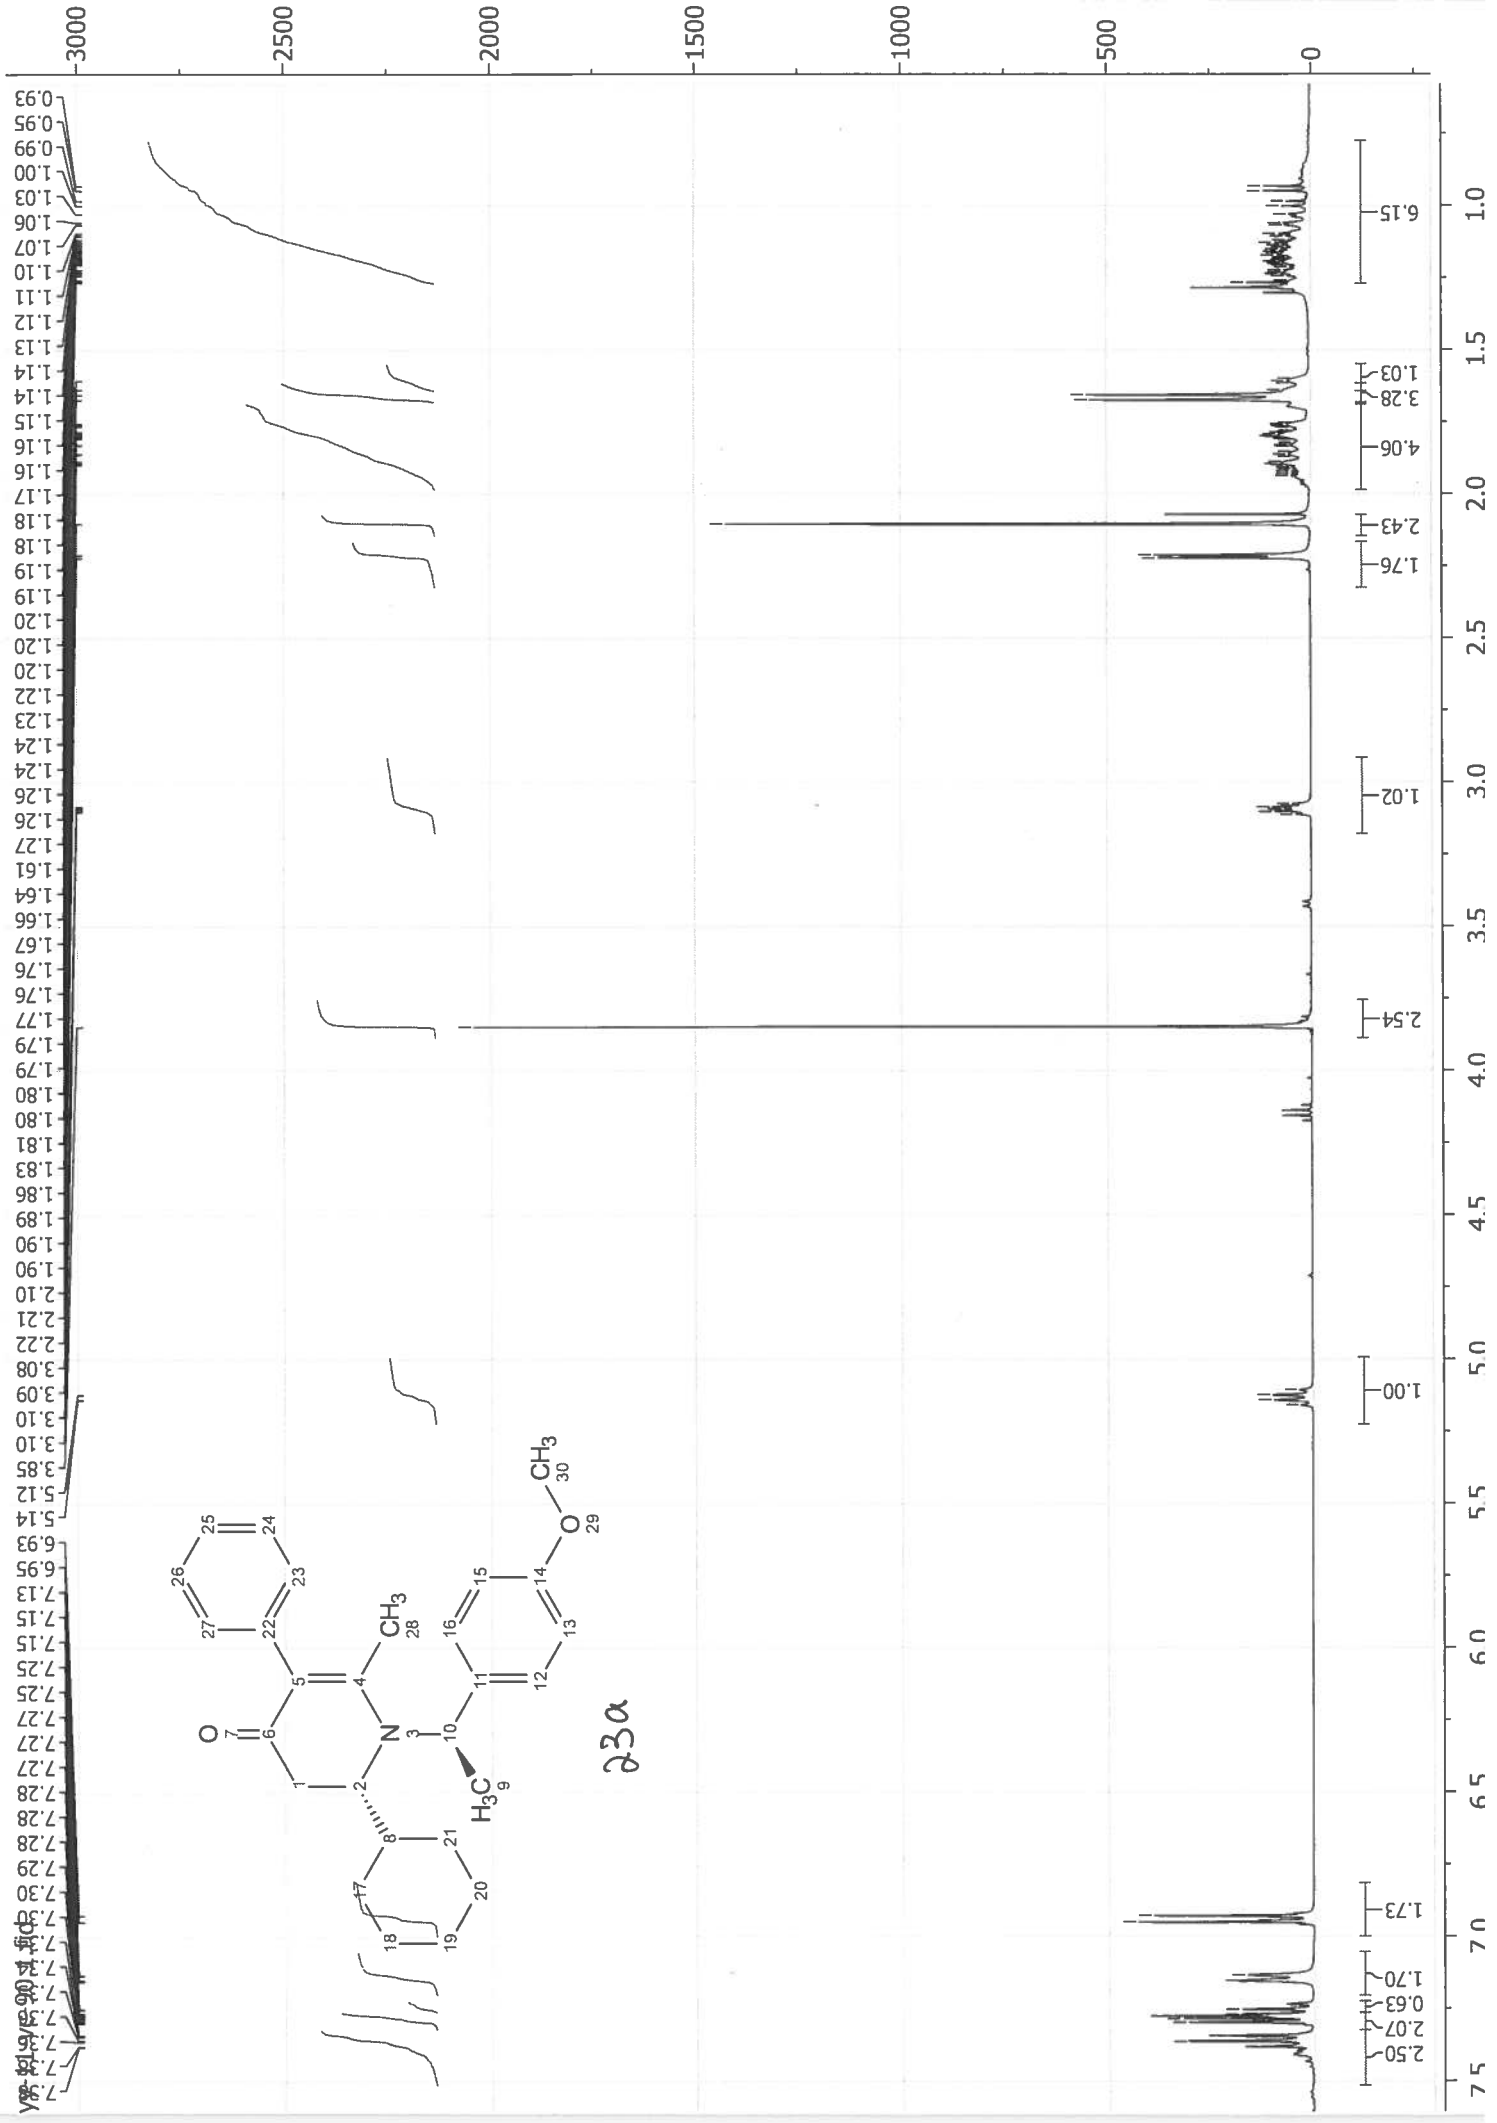

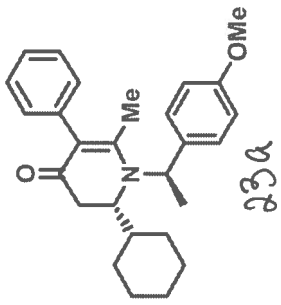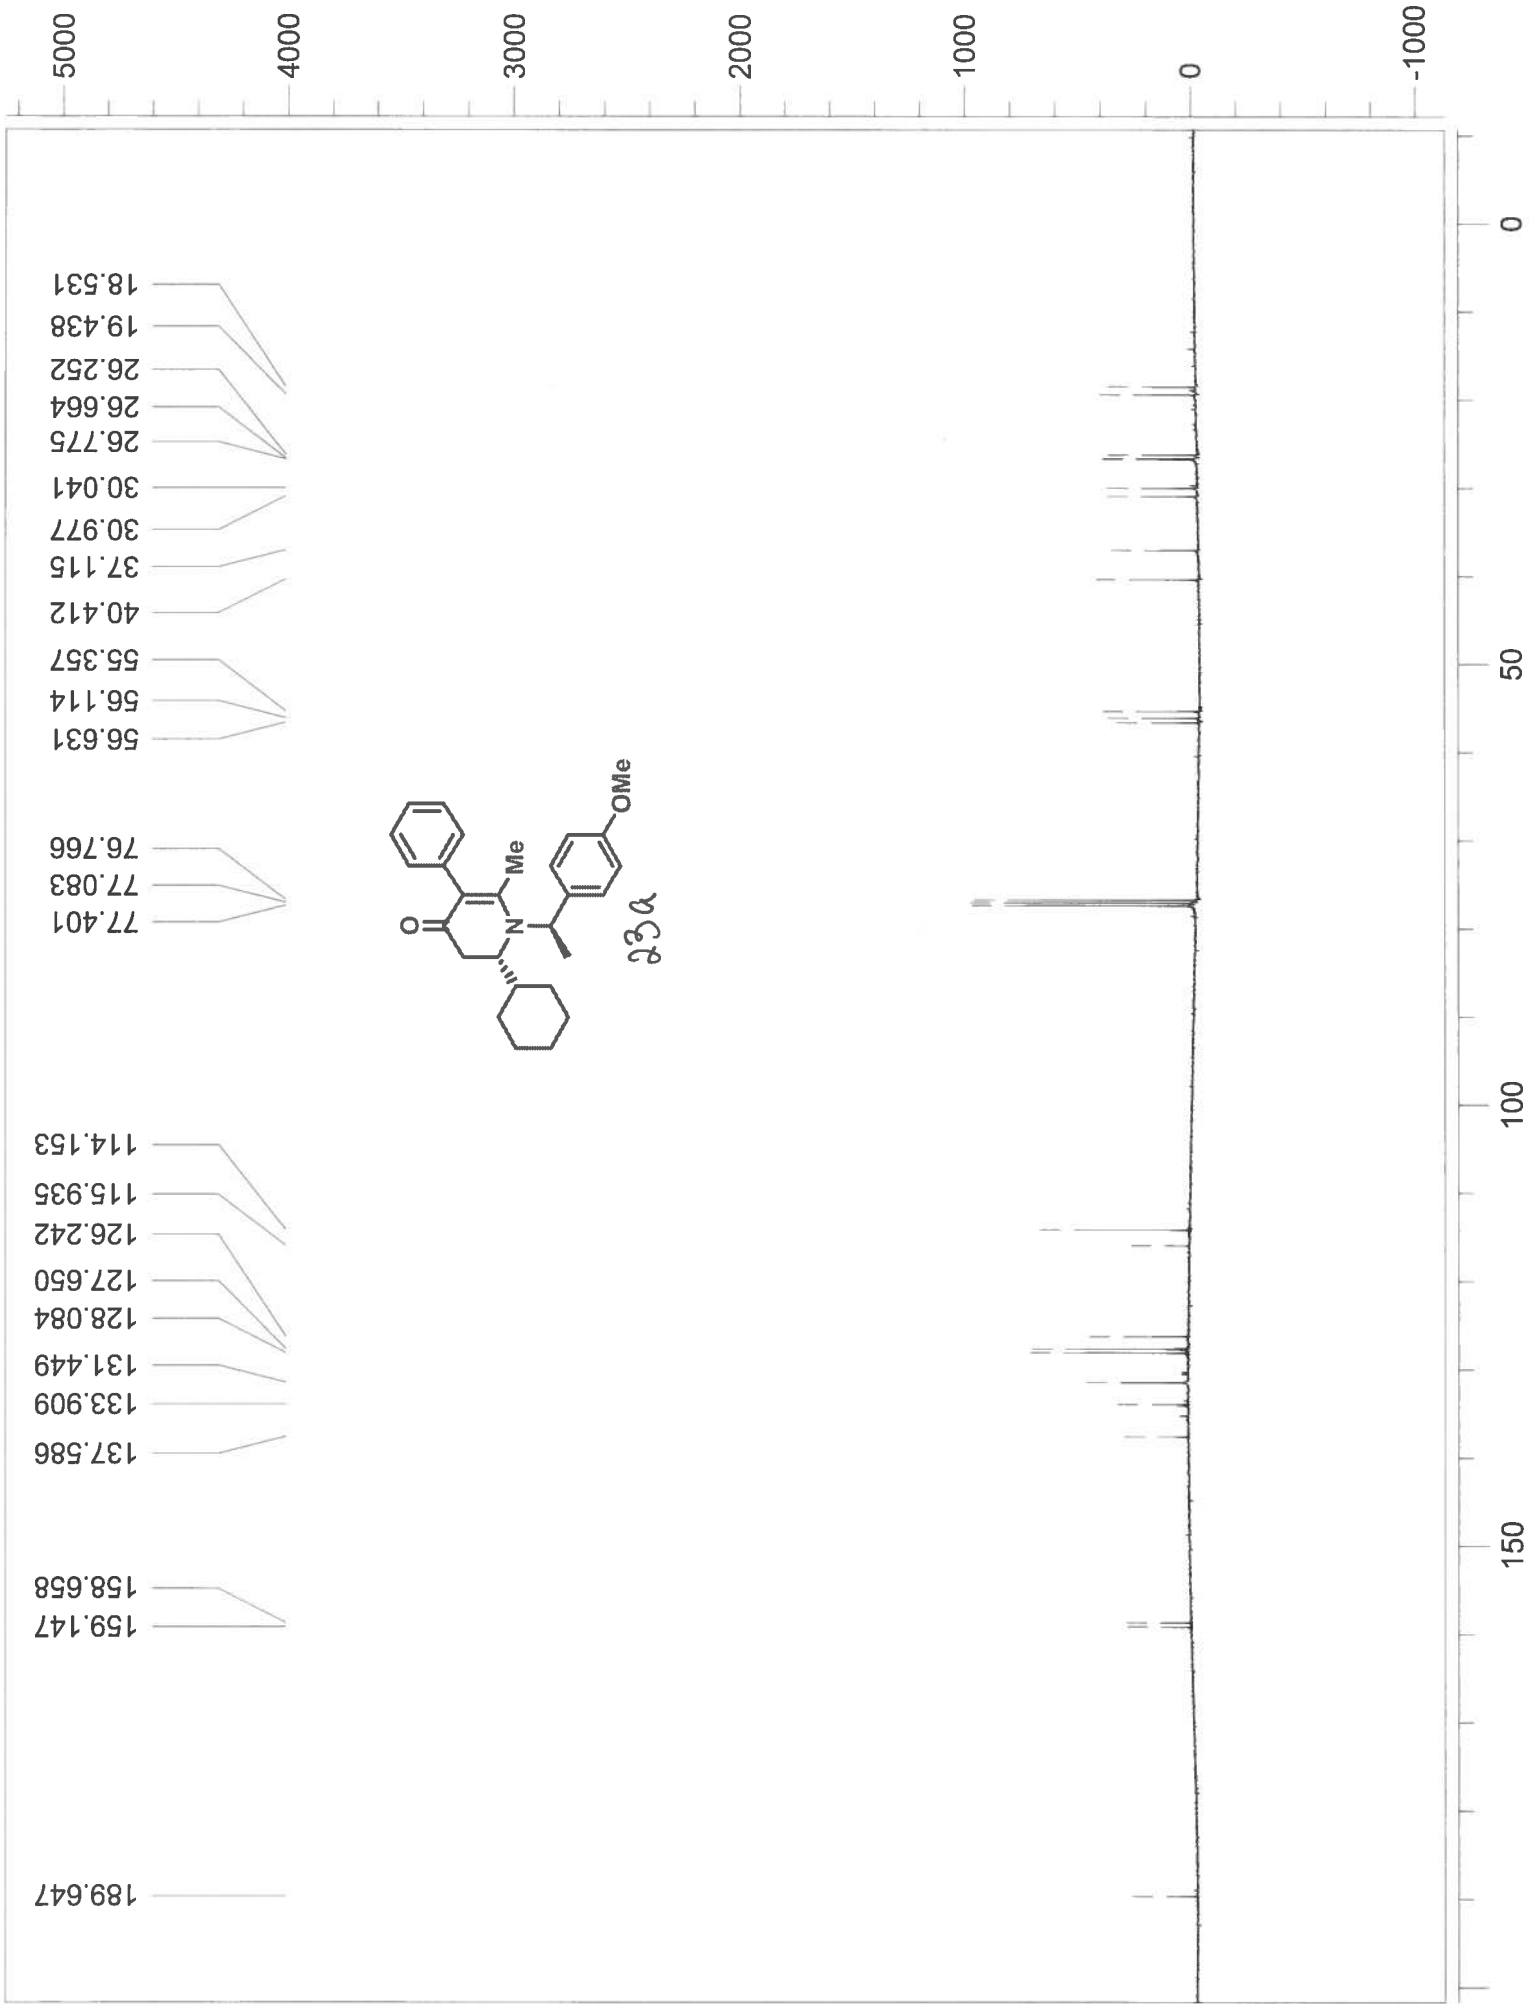

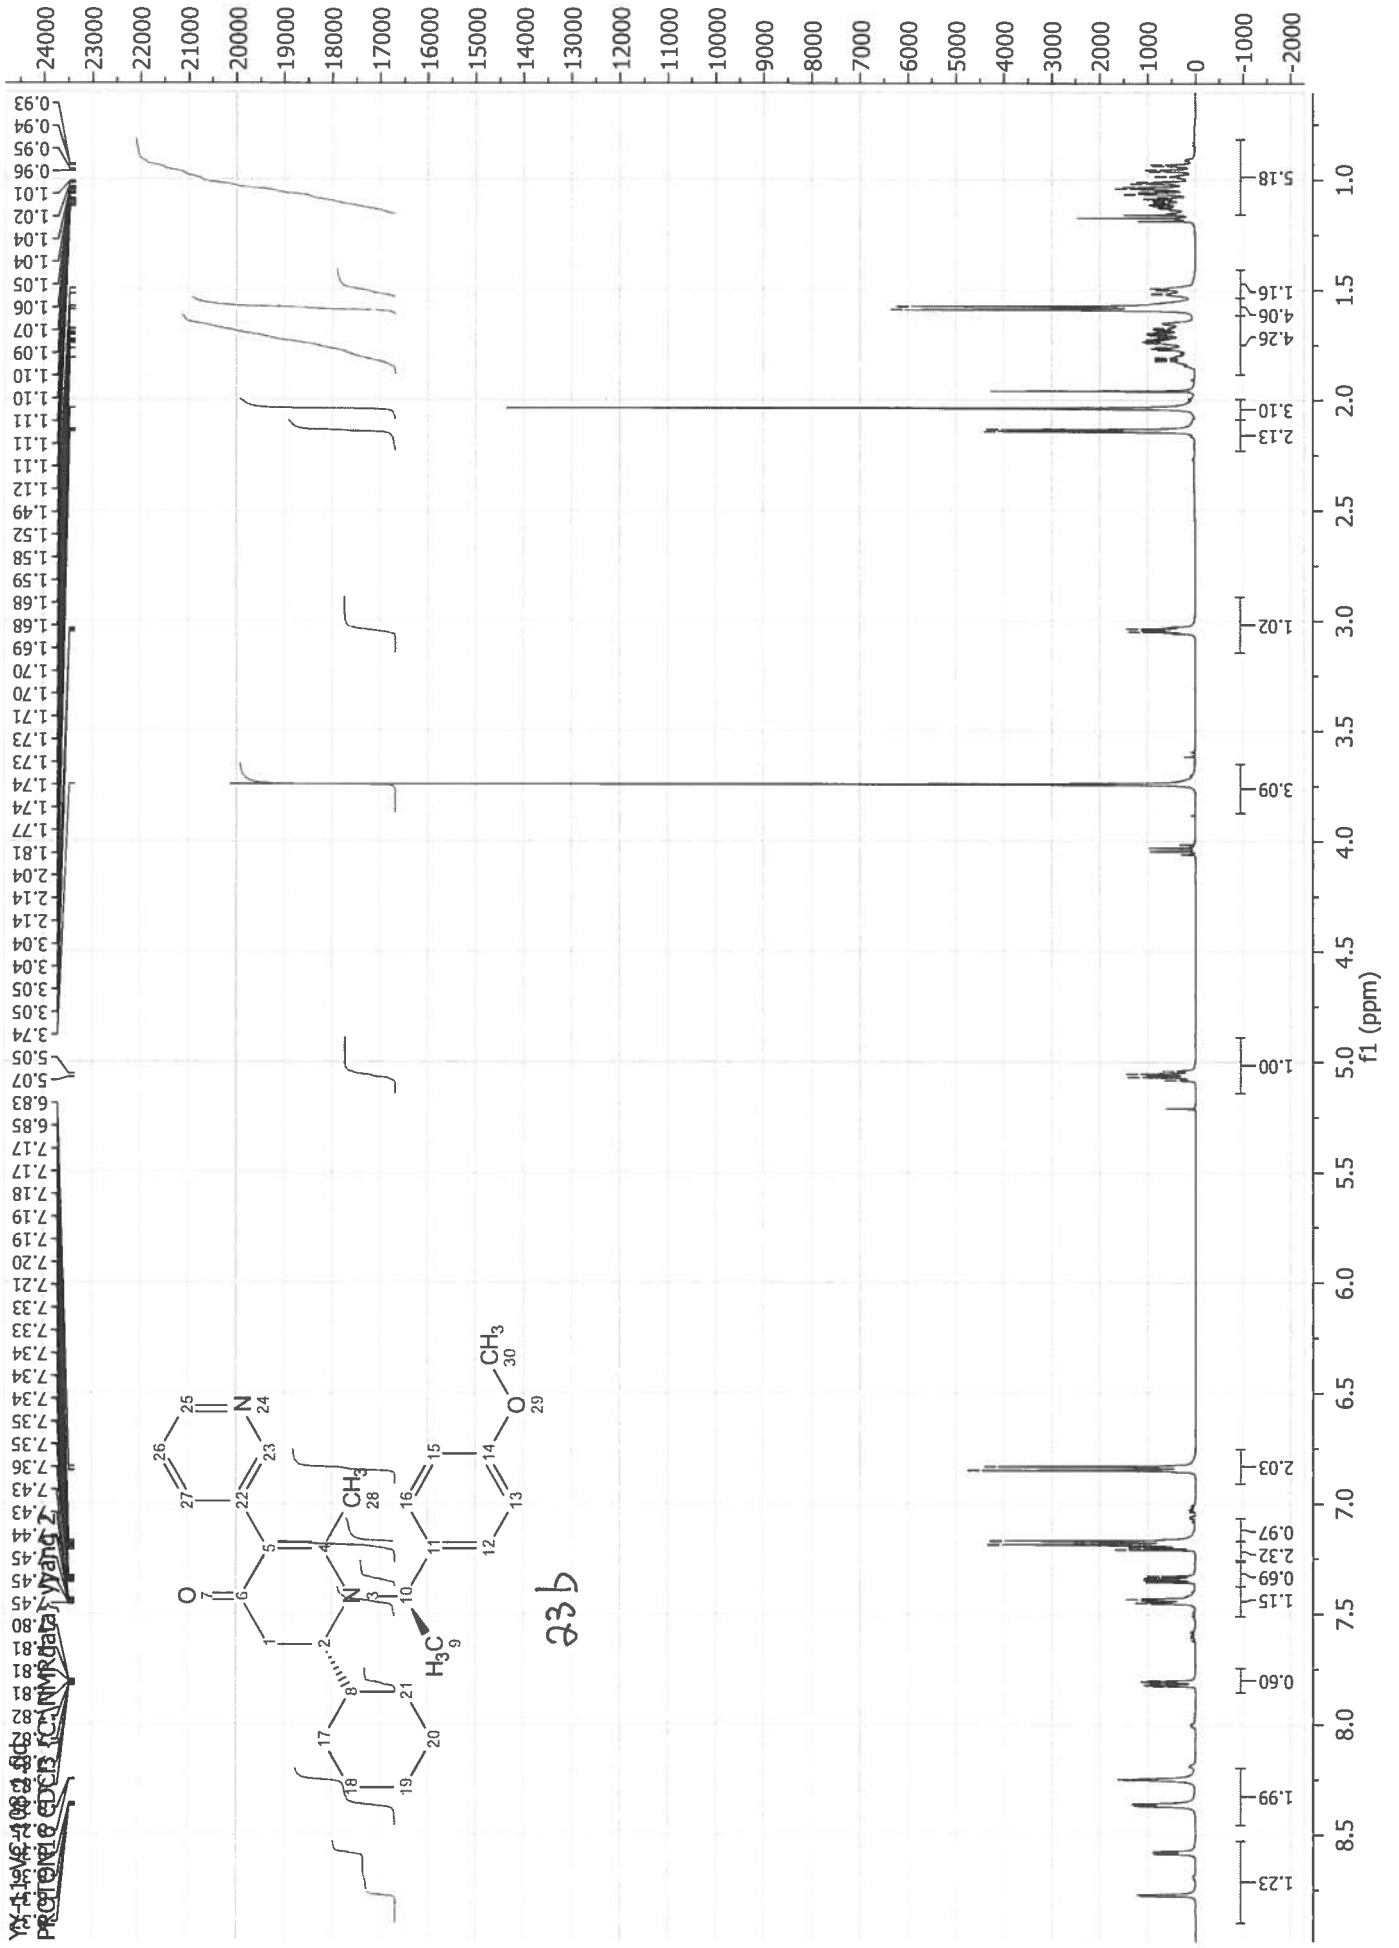

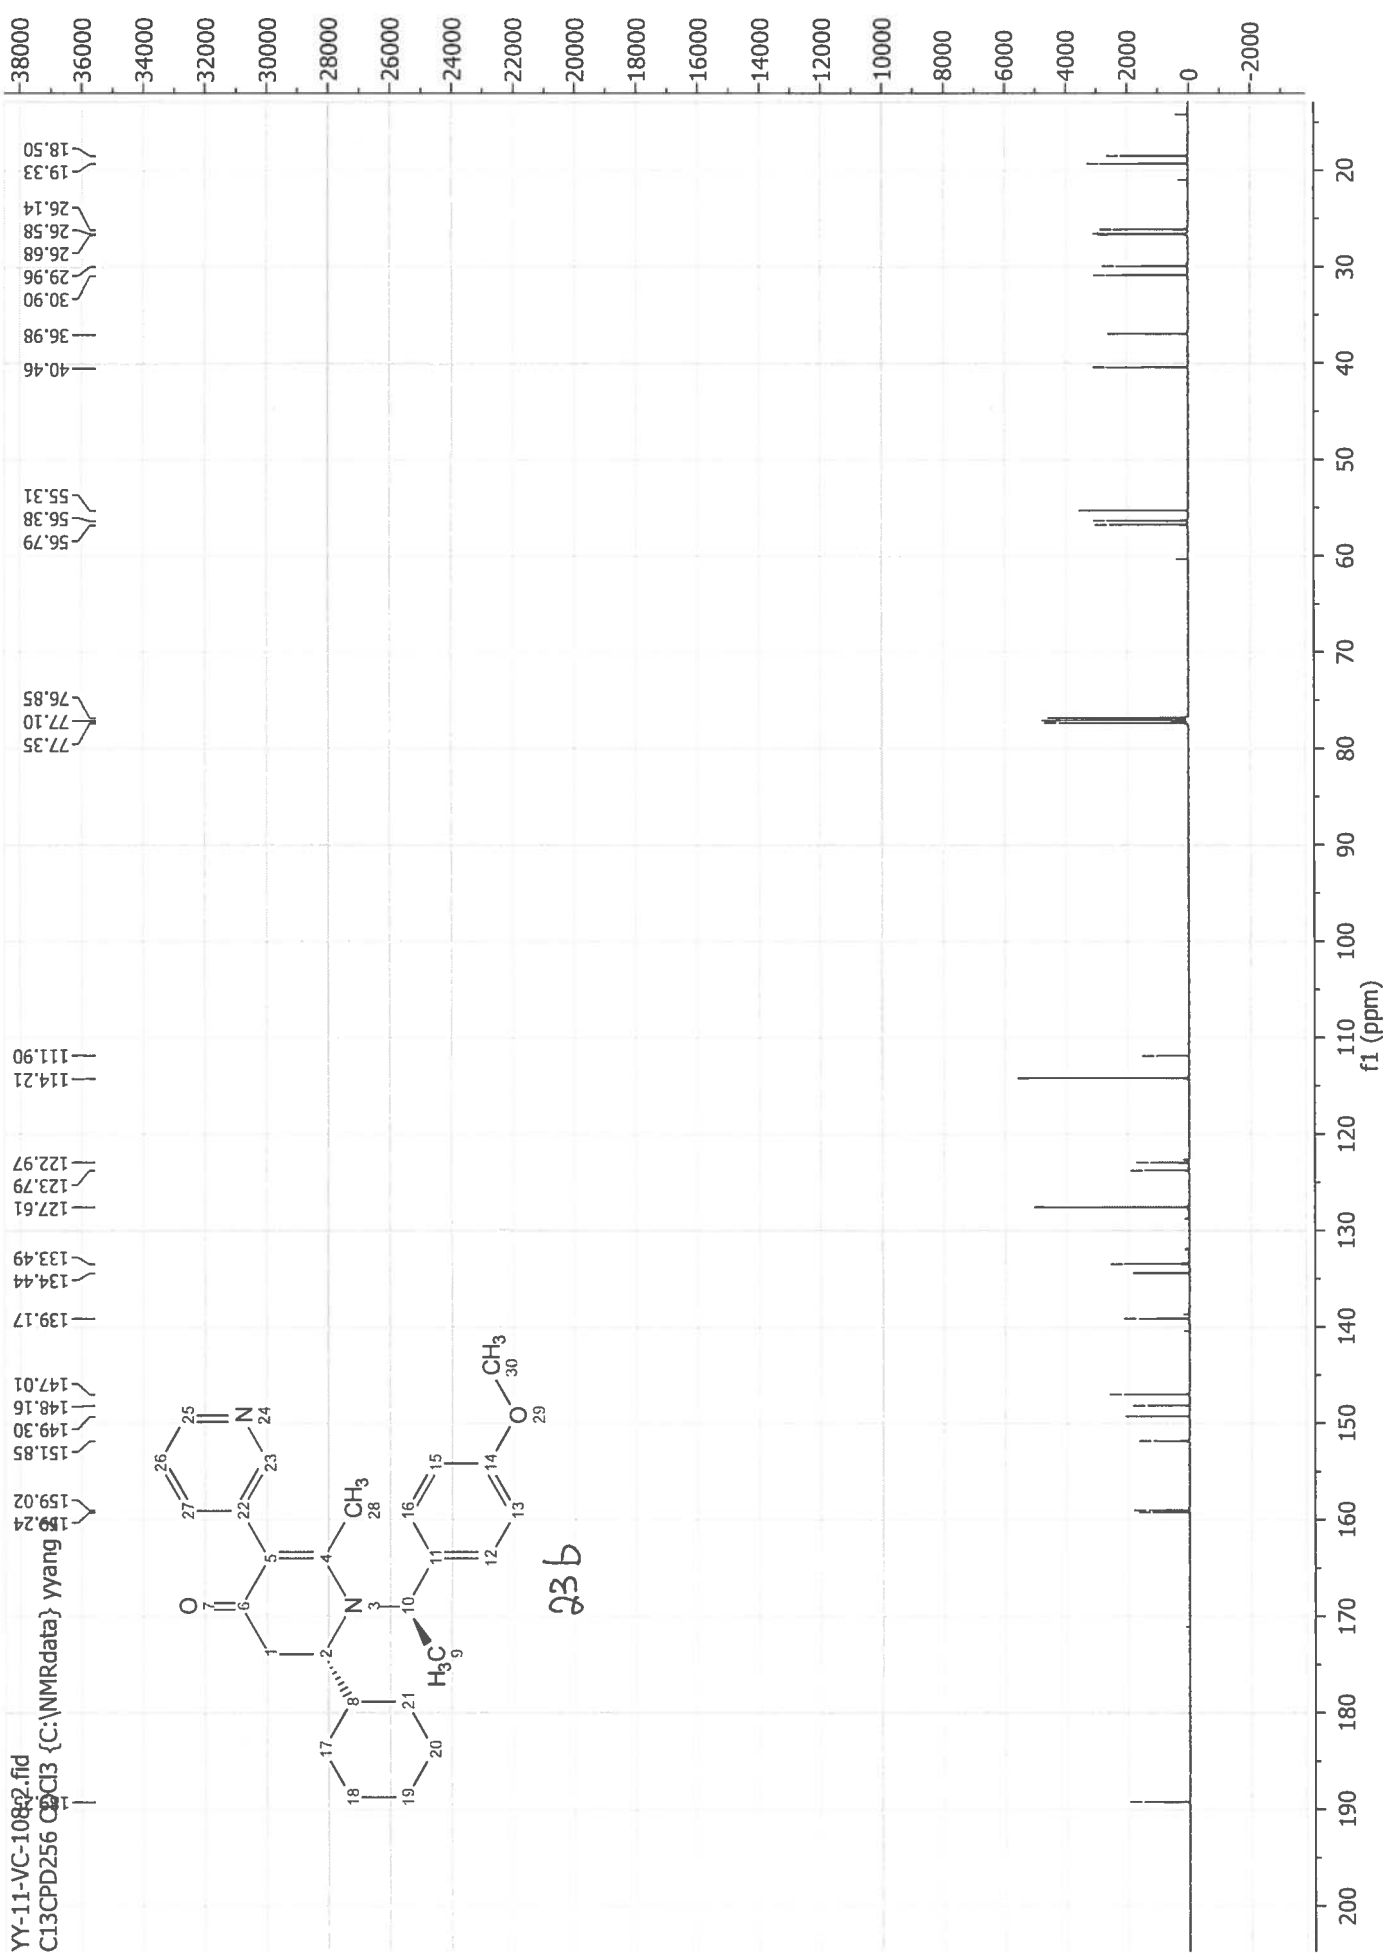

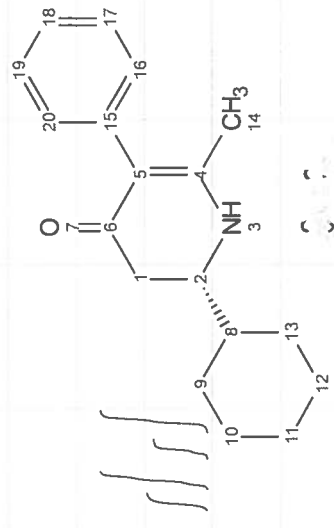

24a

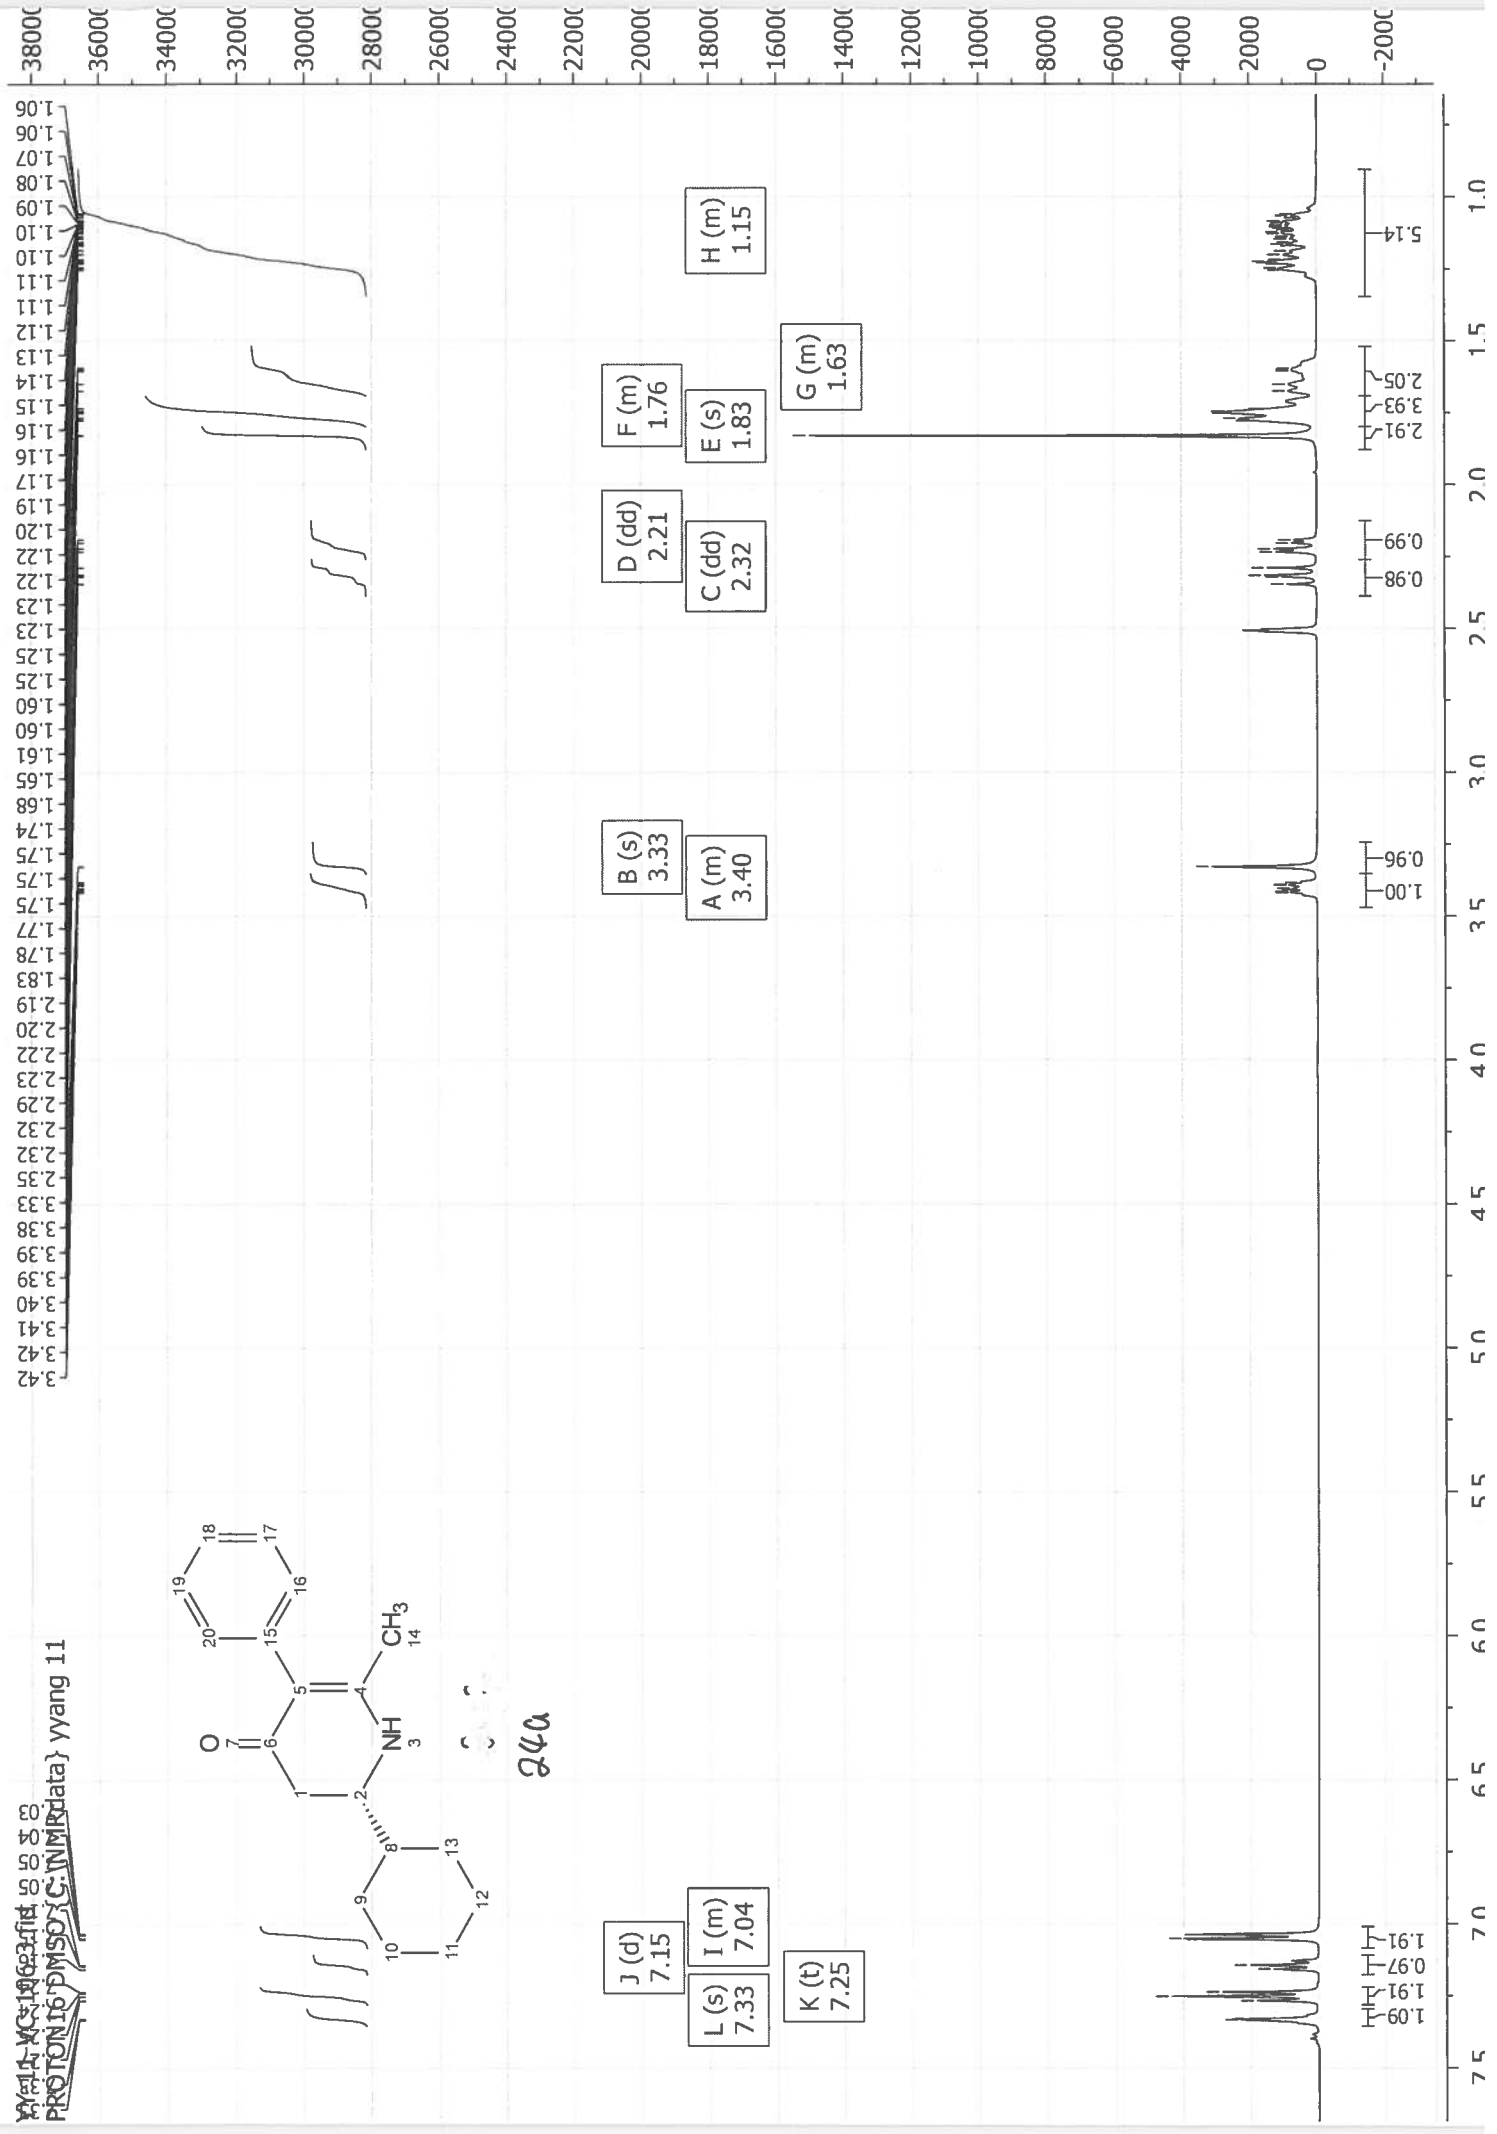



YY-11-VC-106.4.fid  
C13CPD256 DMSO {C13NMRdata} yyang 1115

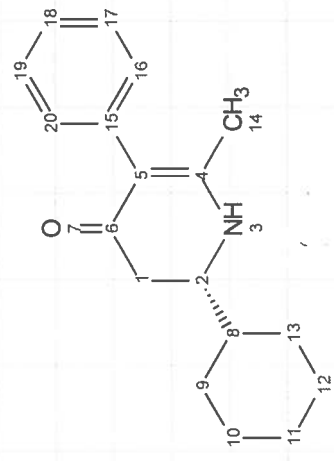

24a

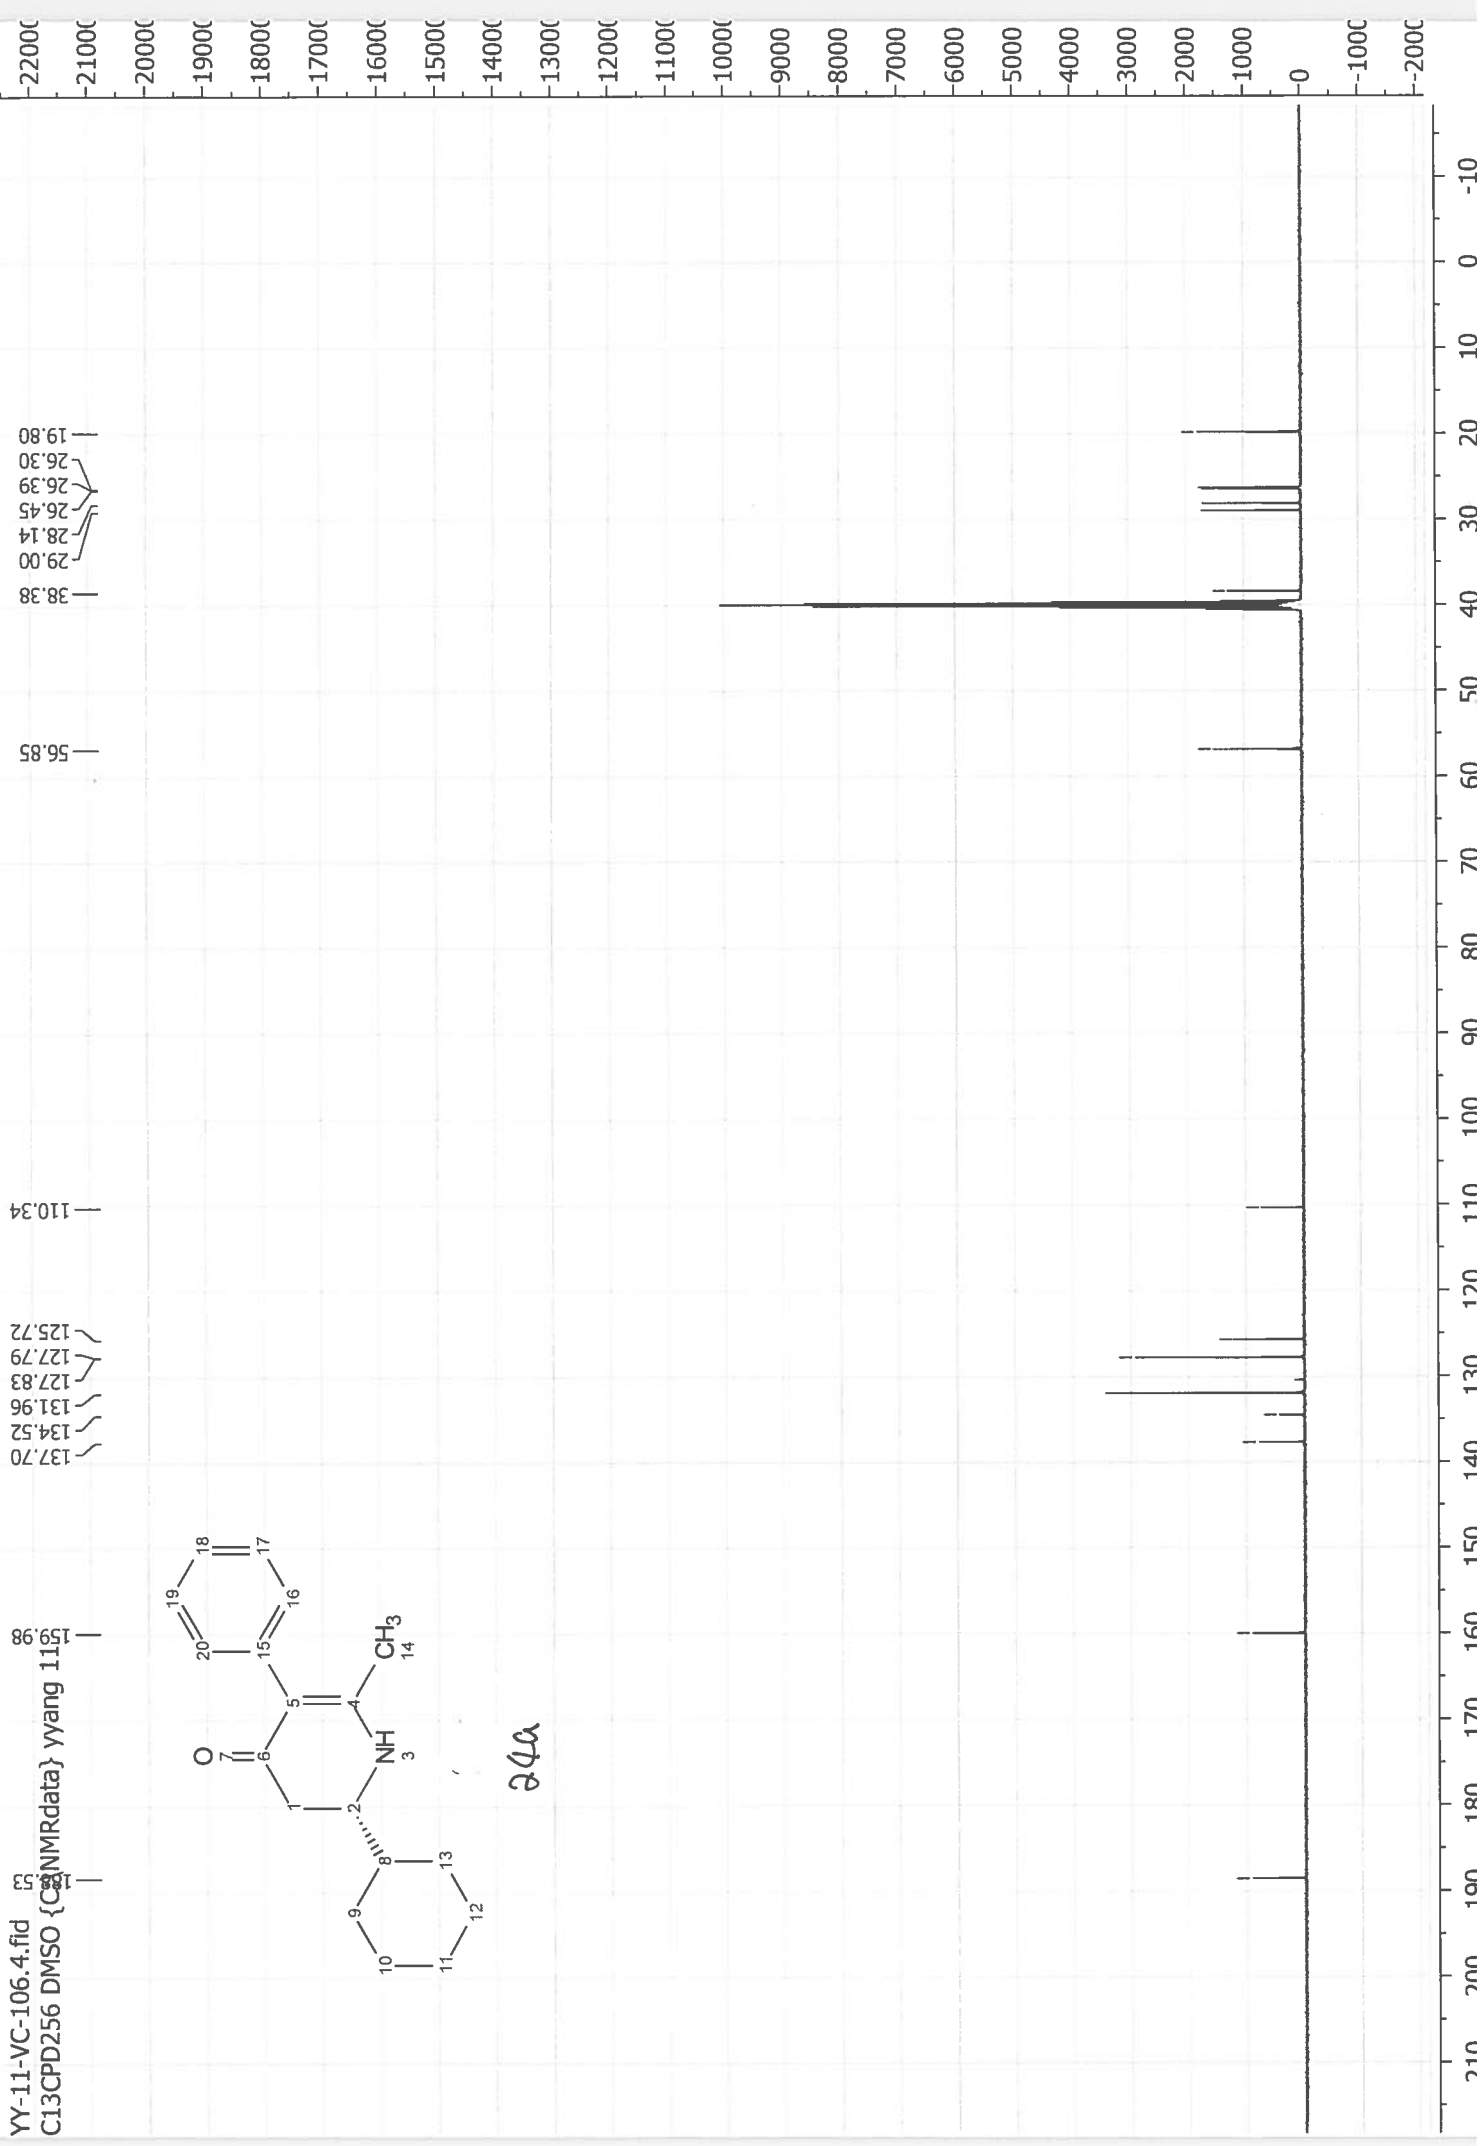

YY-114VC-110.2.fid  
C13CPD256 CDCl3 {c:\NMRdata} 7/2/2017

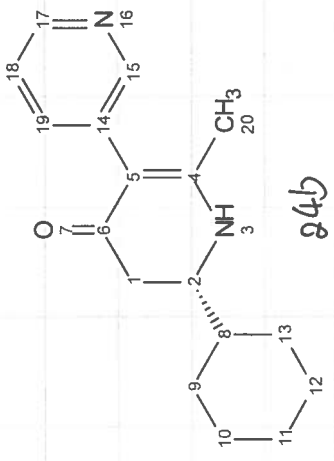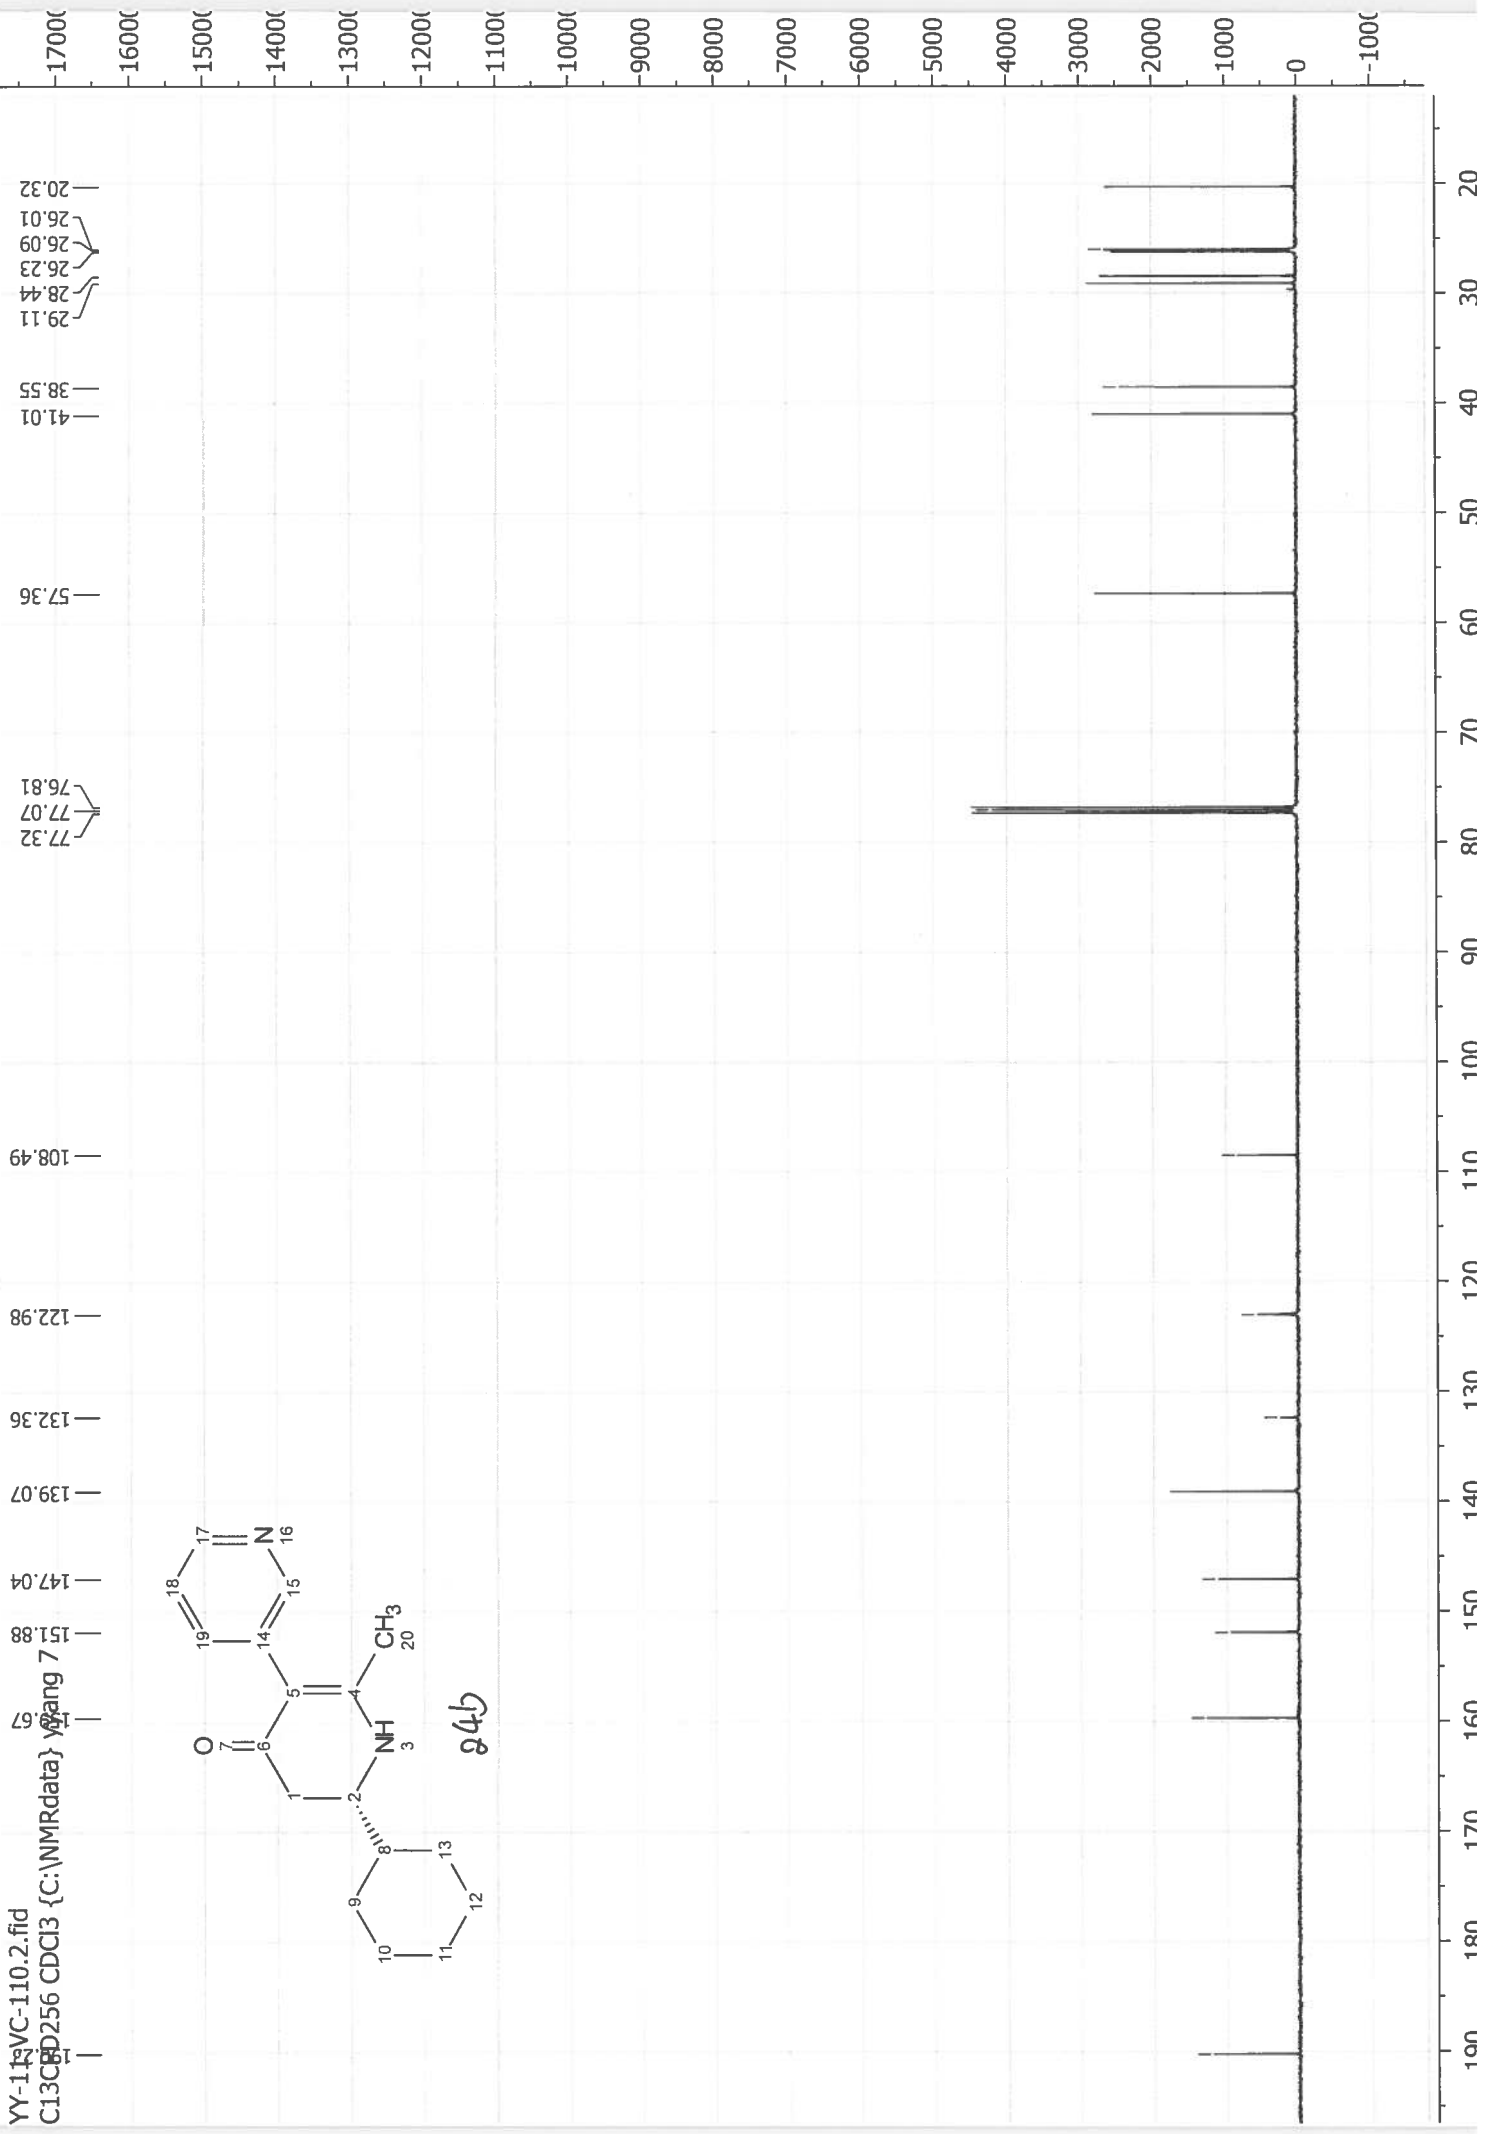

YAG-114AC-14 100% Me<sub>2</sub>SO-d<sub>6</sub> 400 MHz, 300 K, INMRADETA Vyvanti 7  
PR010116 CDE13 1C, INMRADETA Vyvanti 7

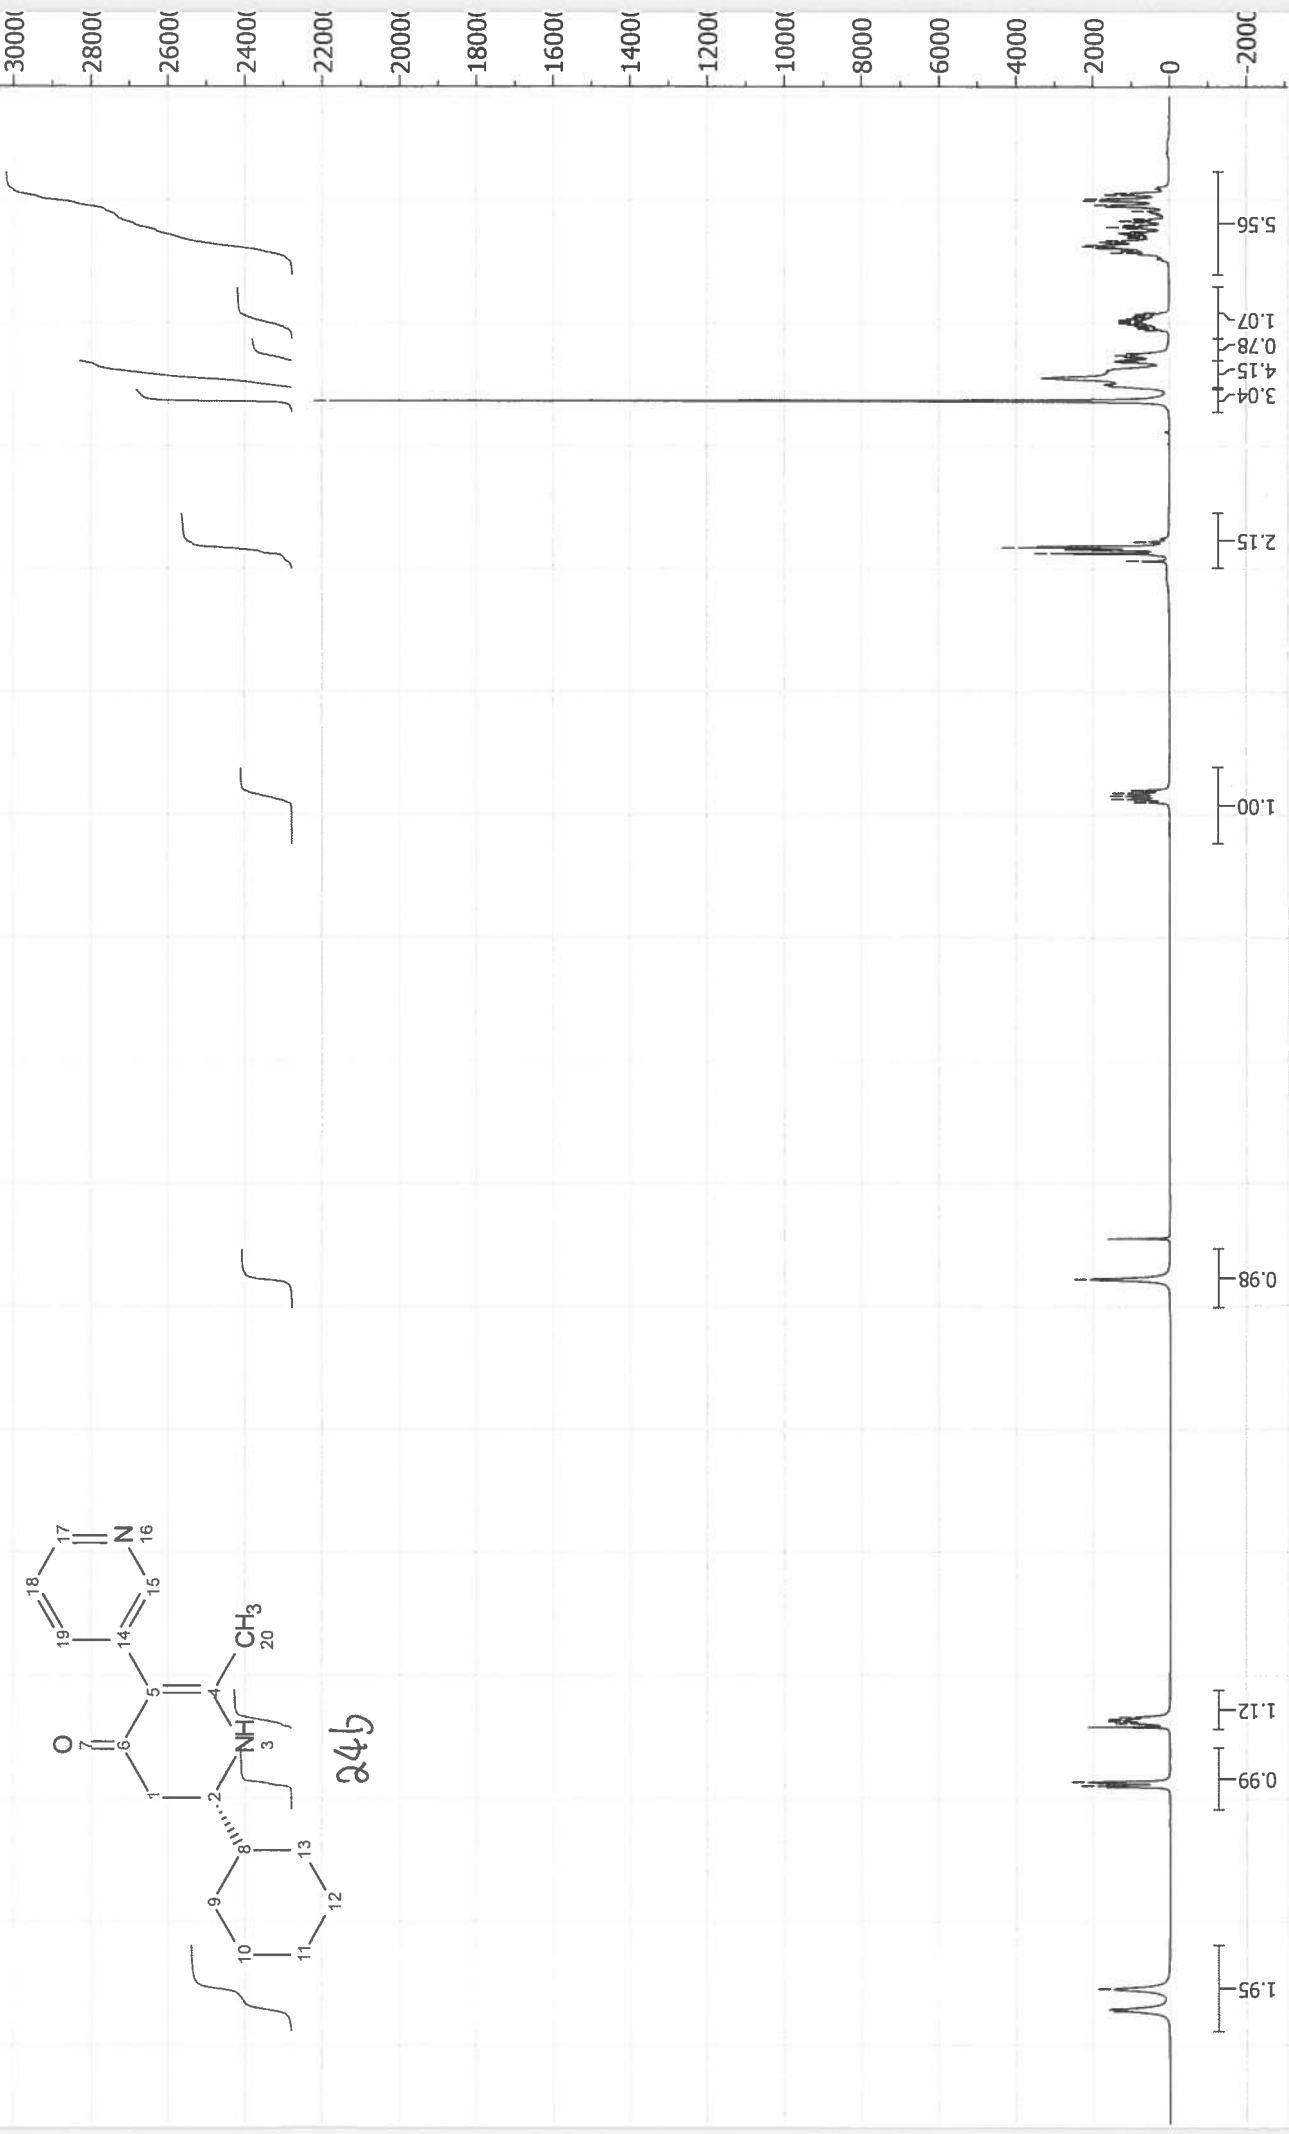

24b

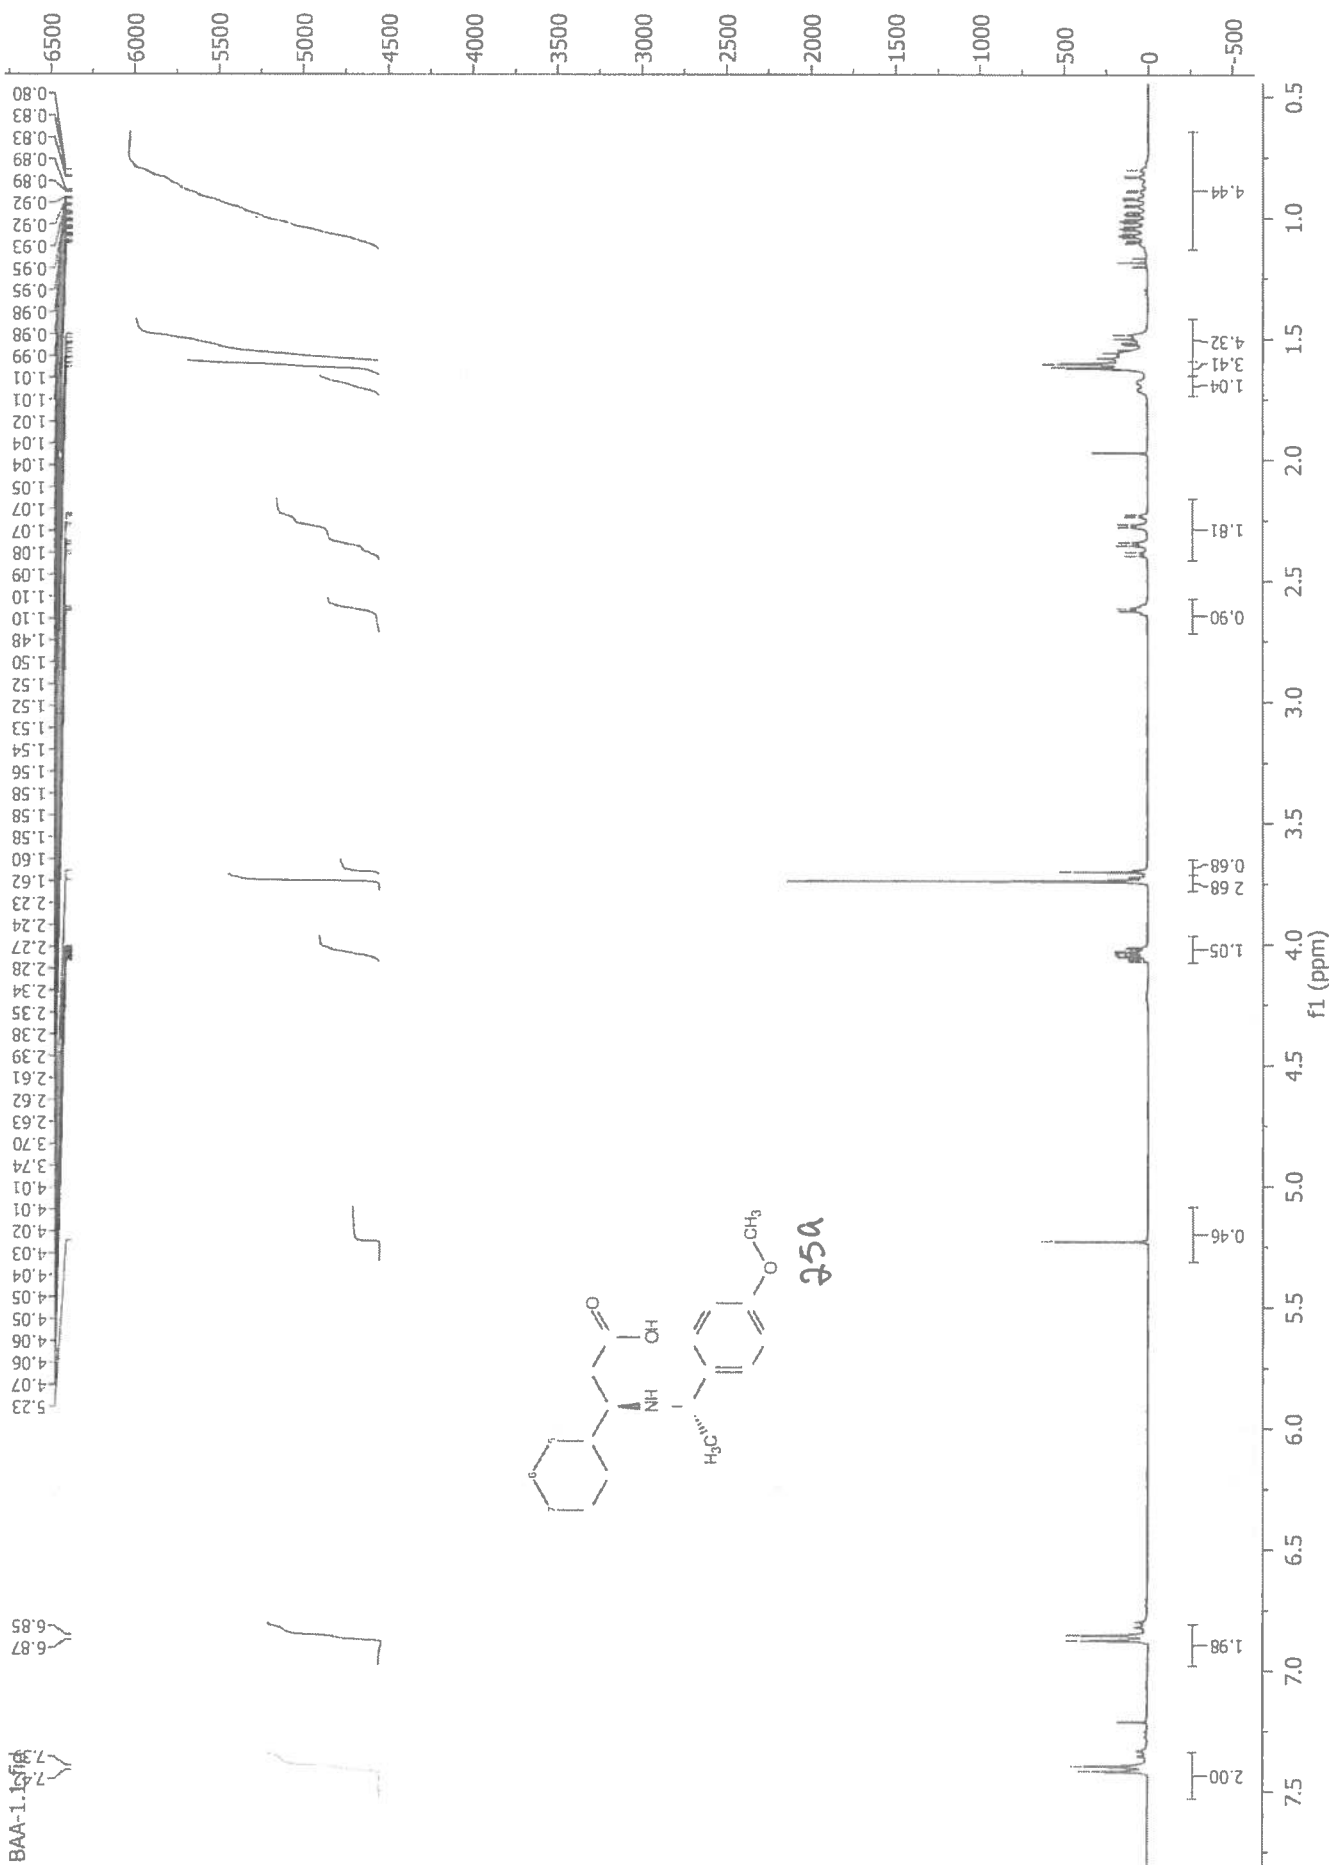

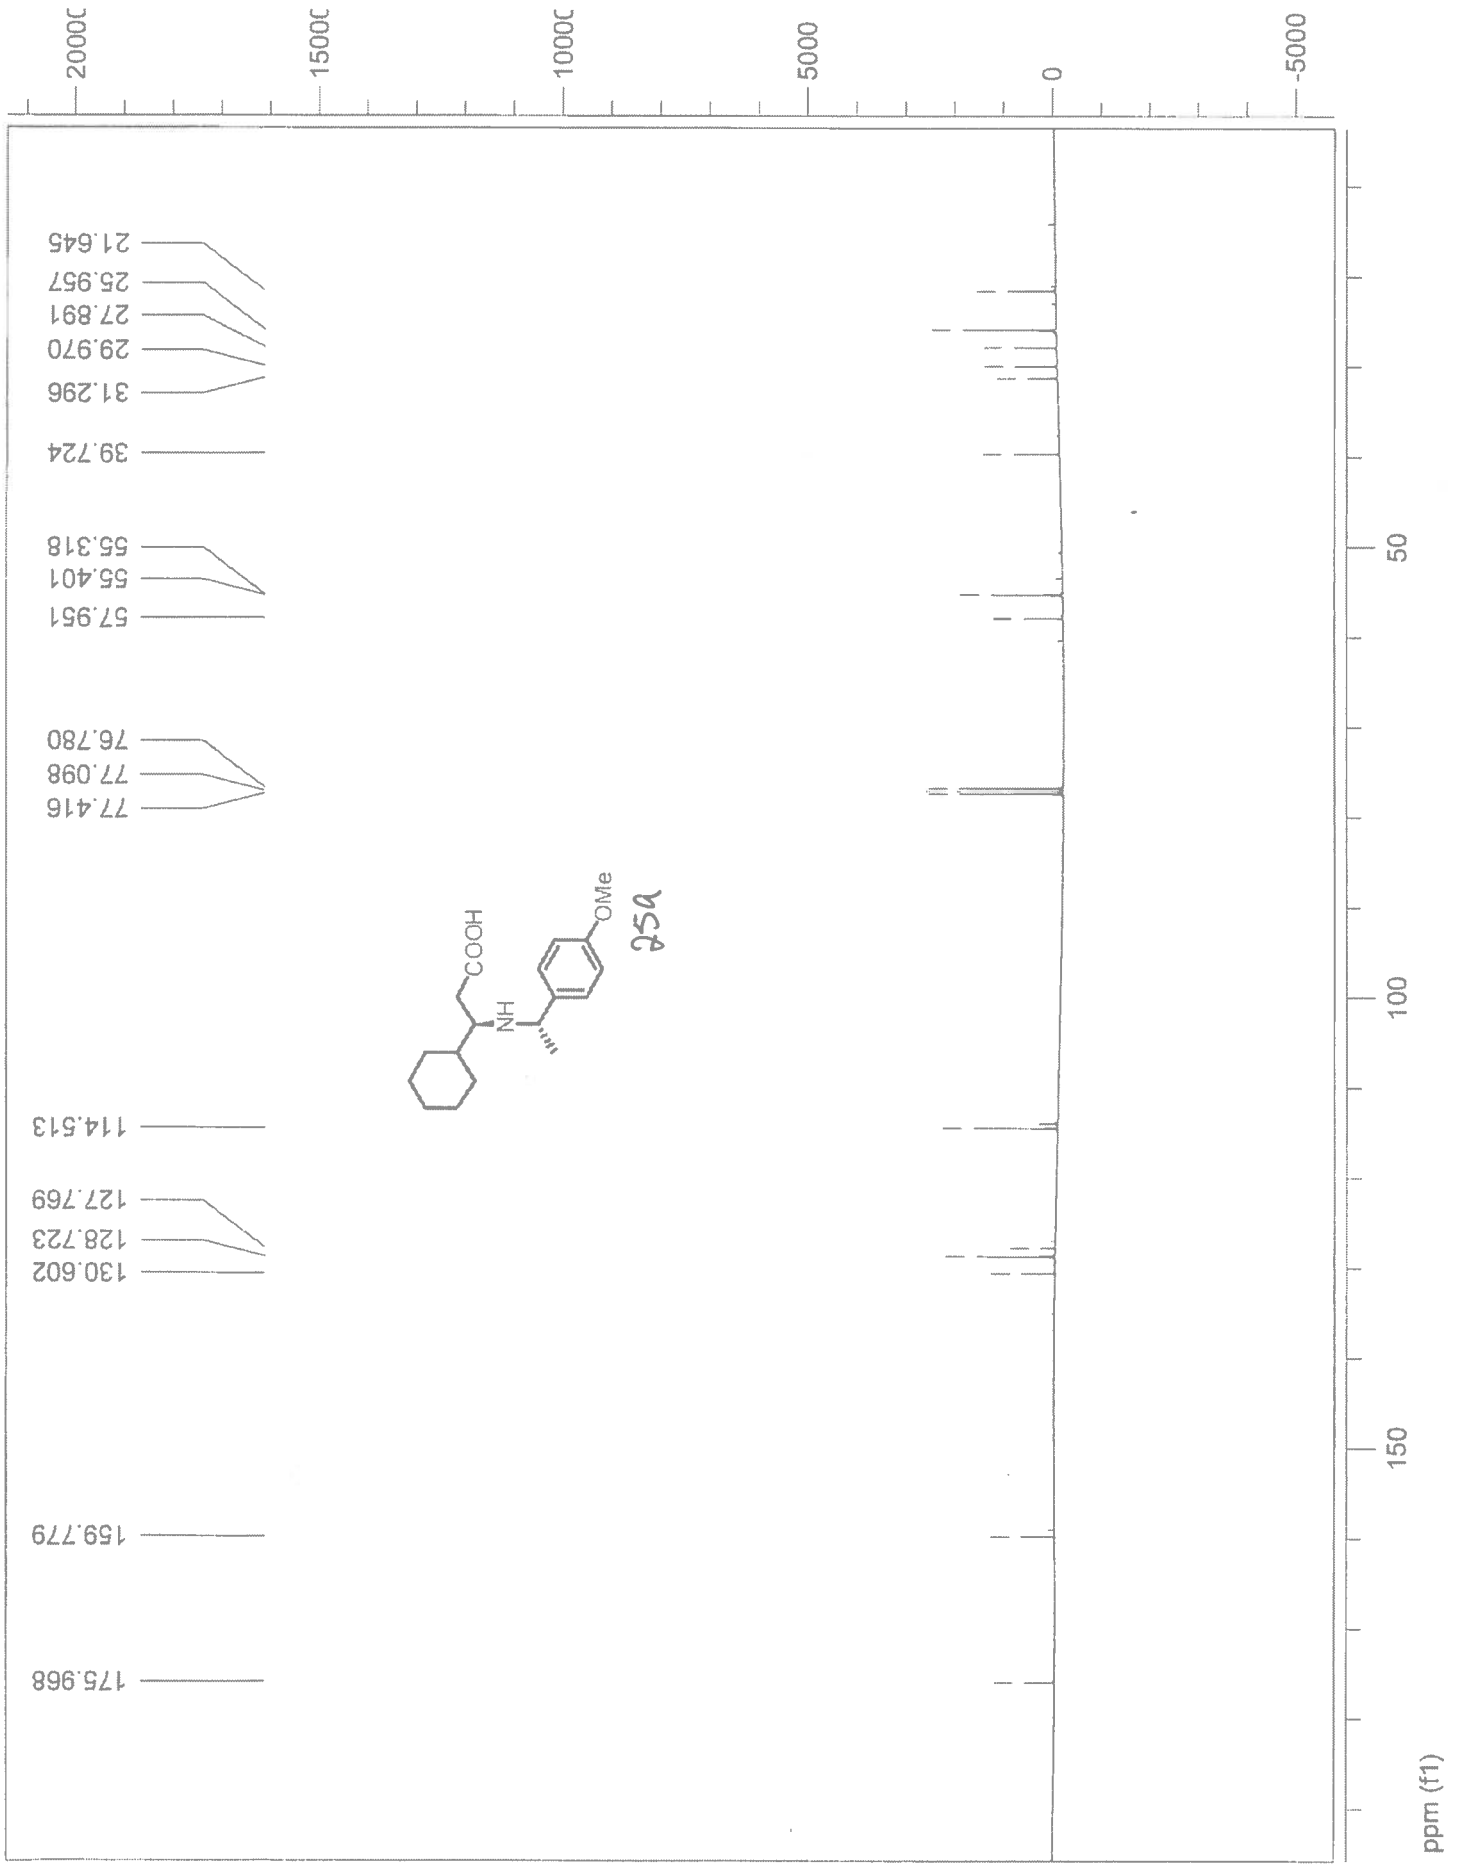

0731-hexBETA 4.fid  
hexenal vmr cleave

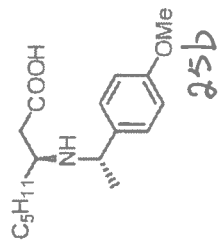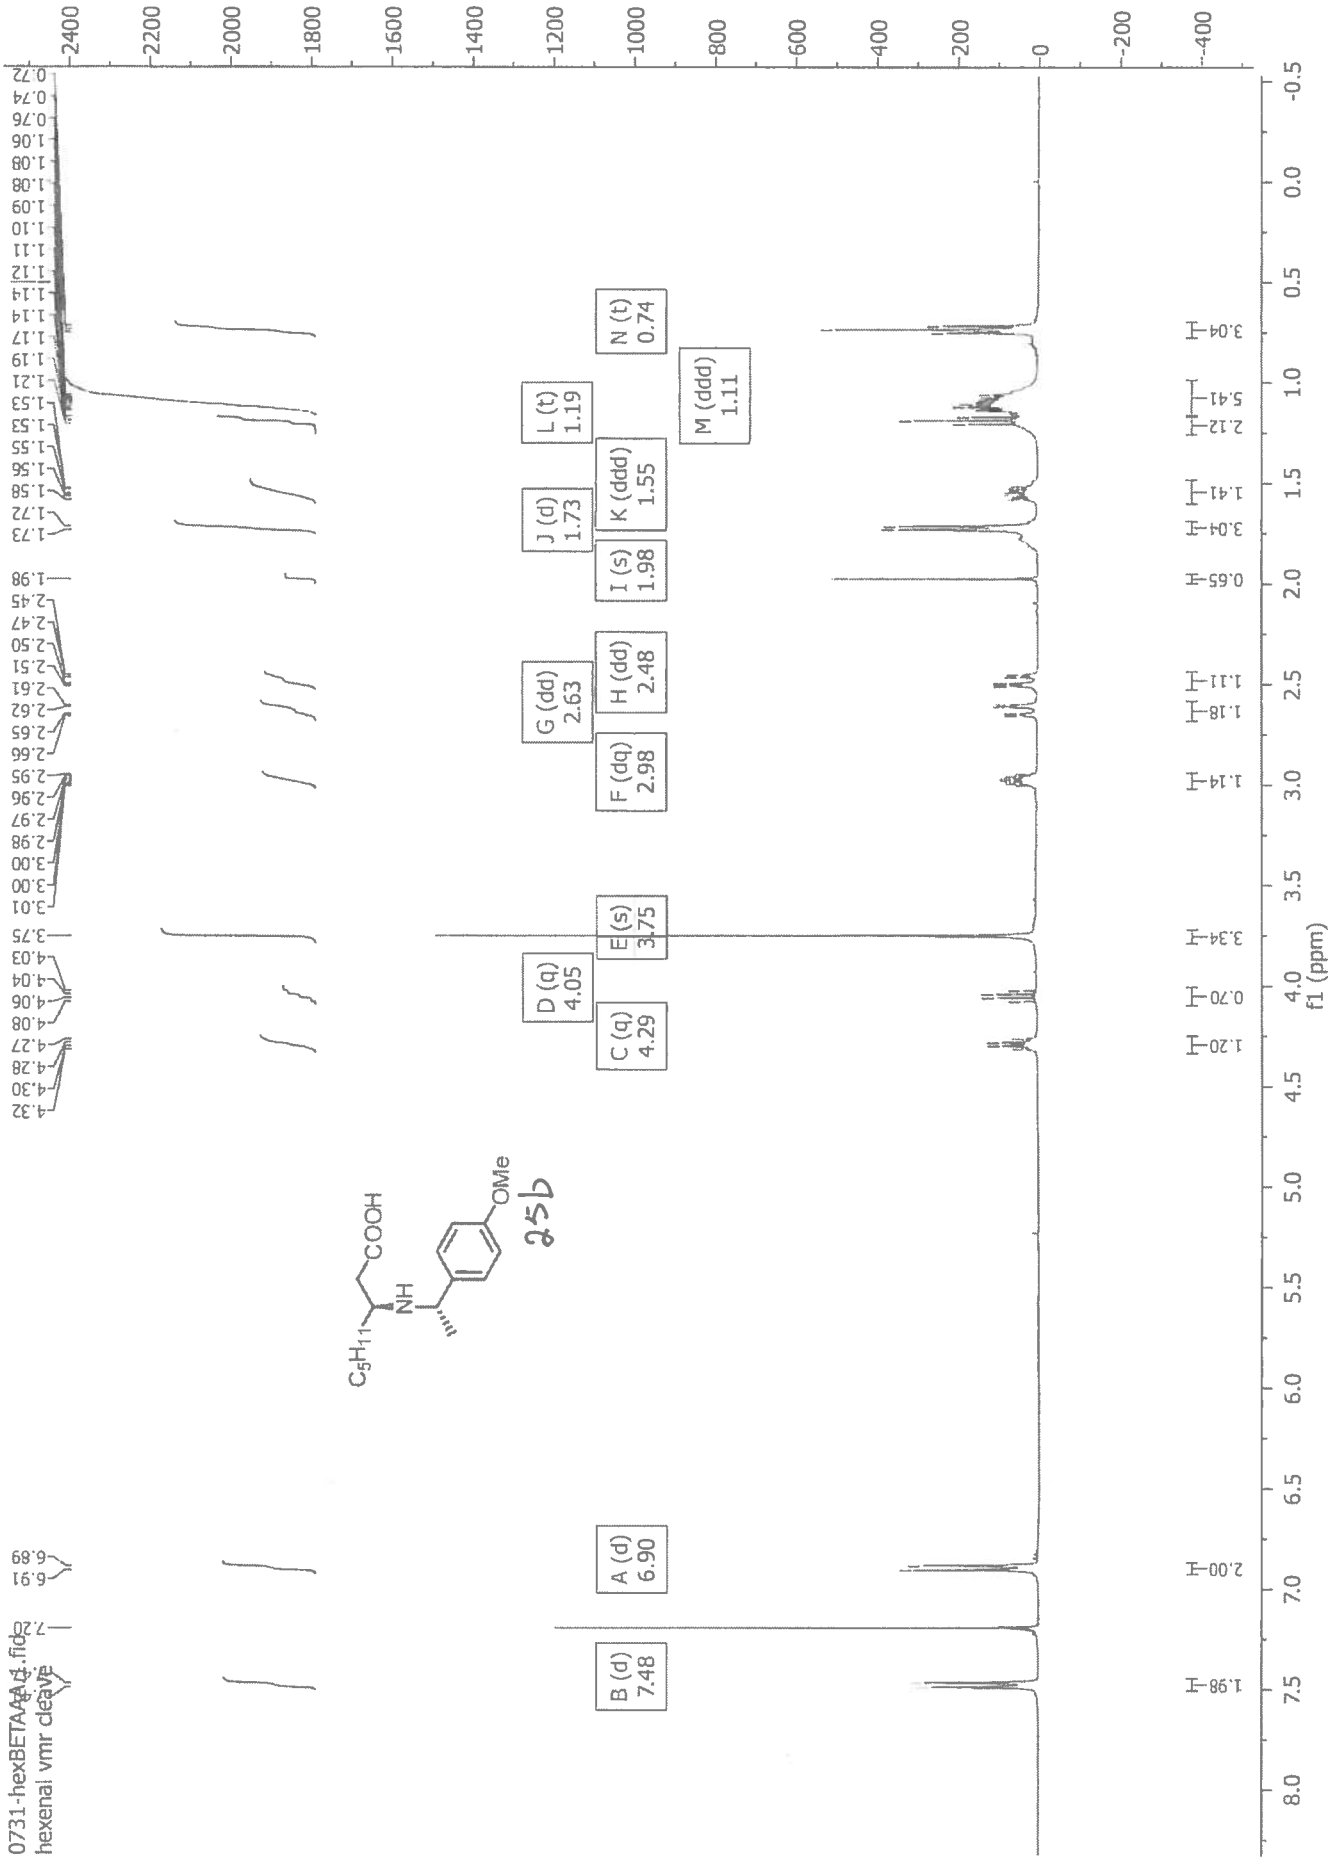

5948-0701-hexVMRcleave.2.fid  
hexenol VMR cleaved

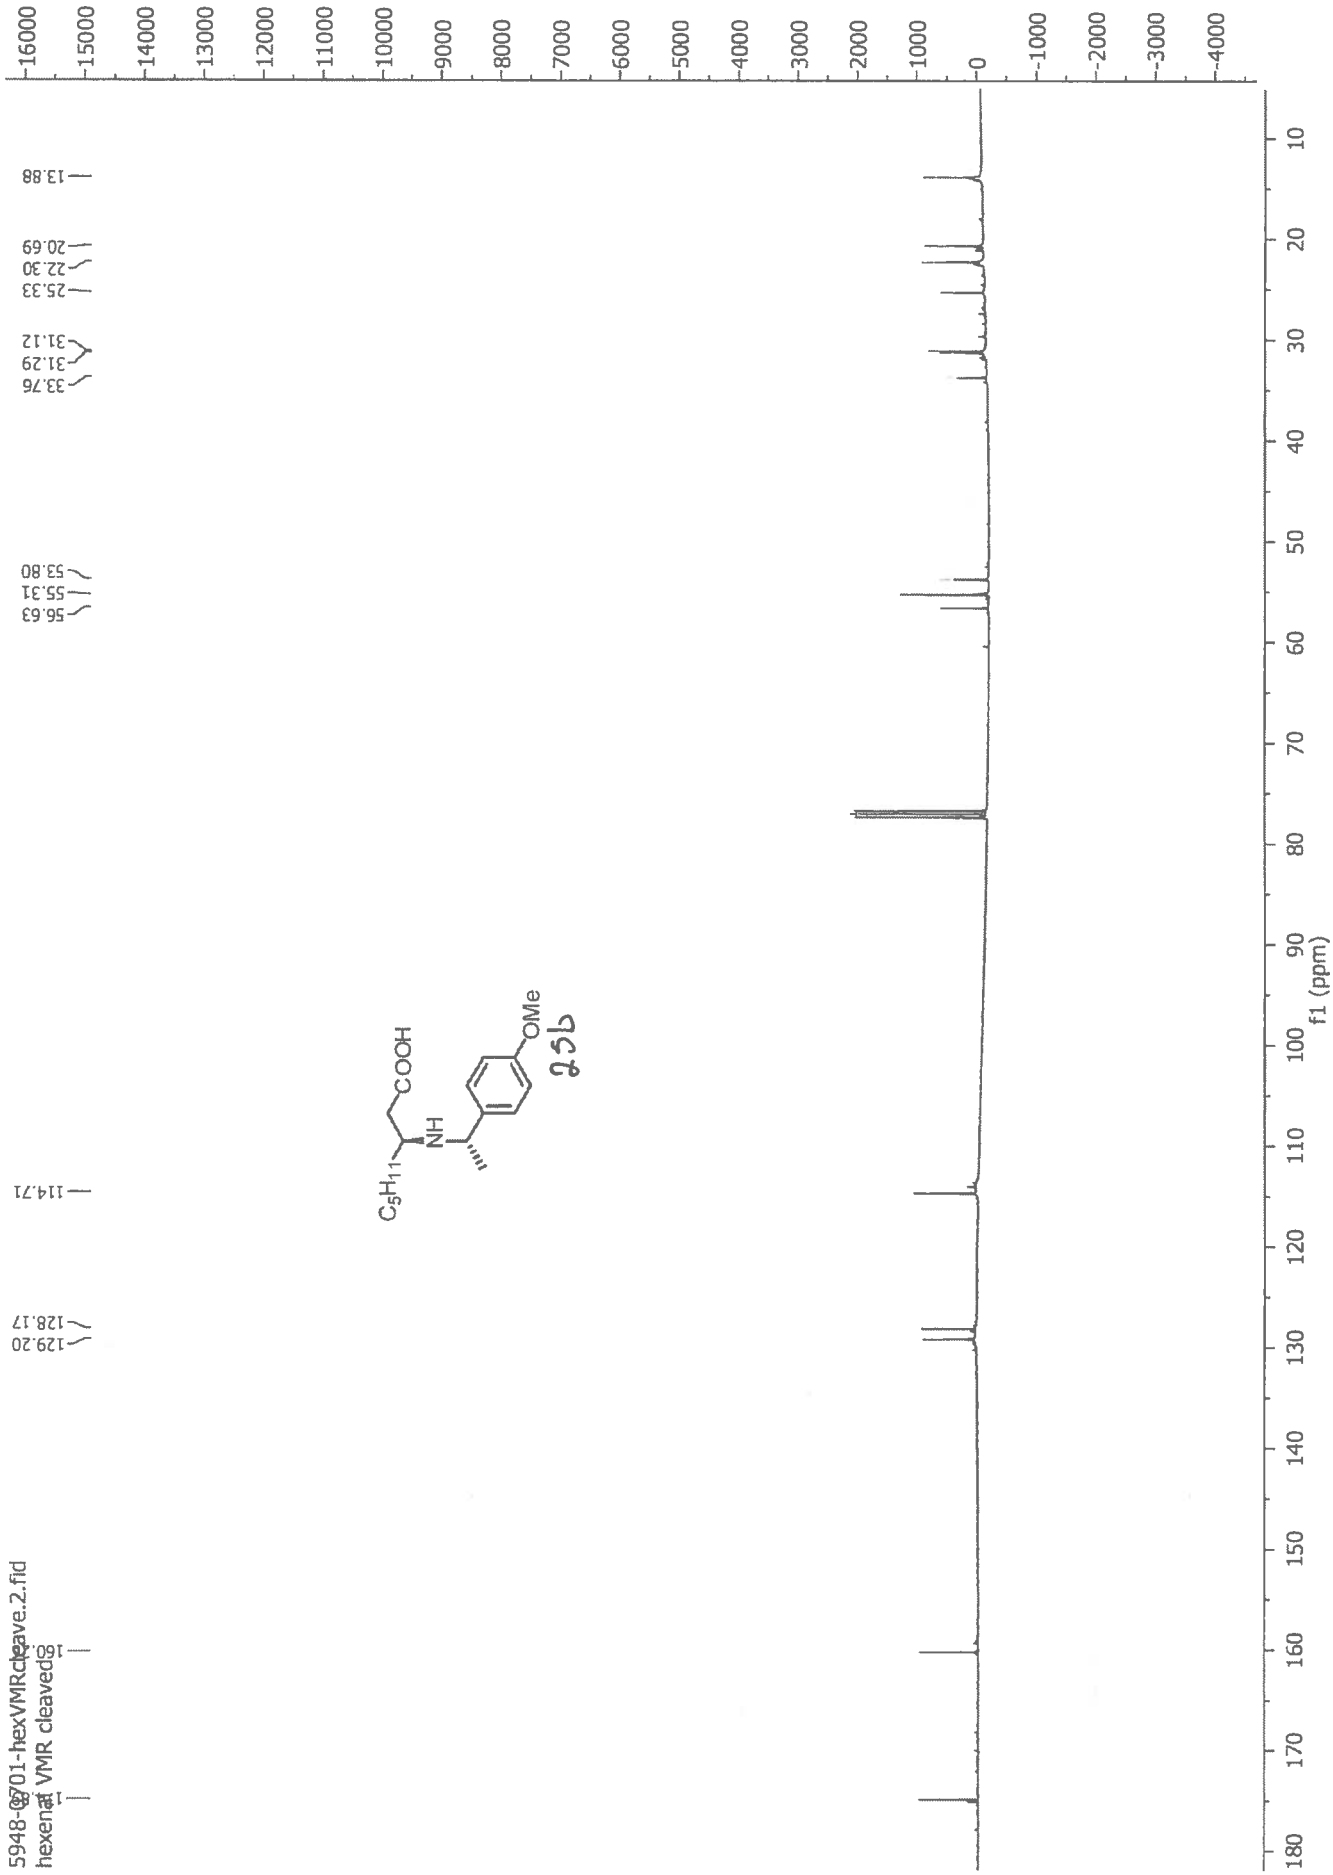

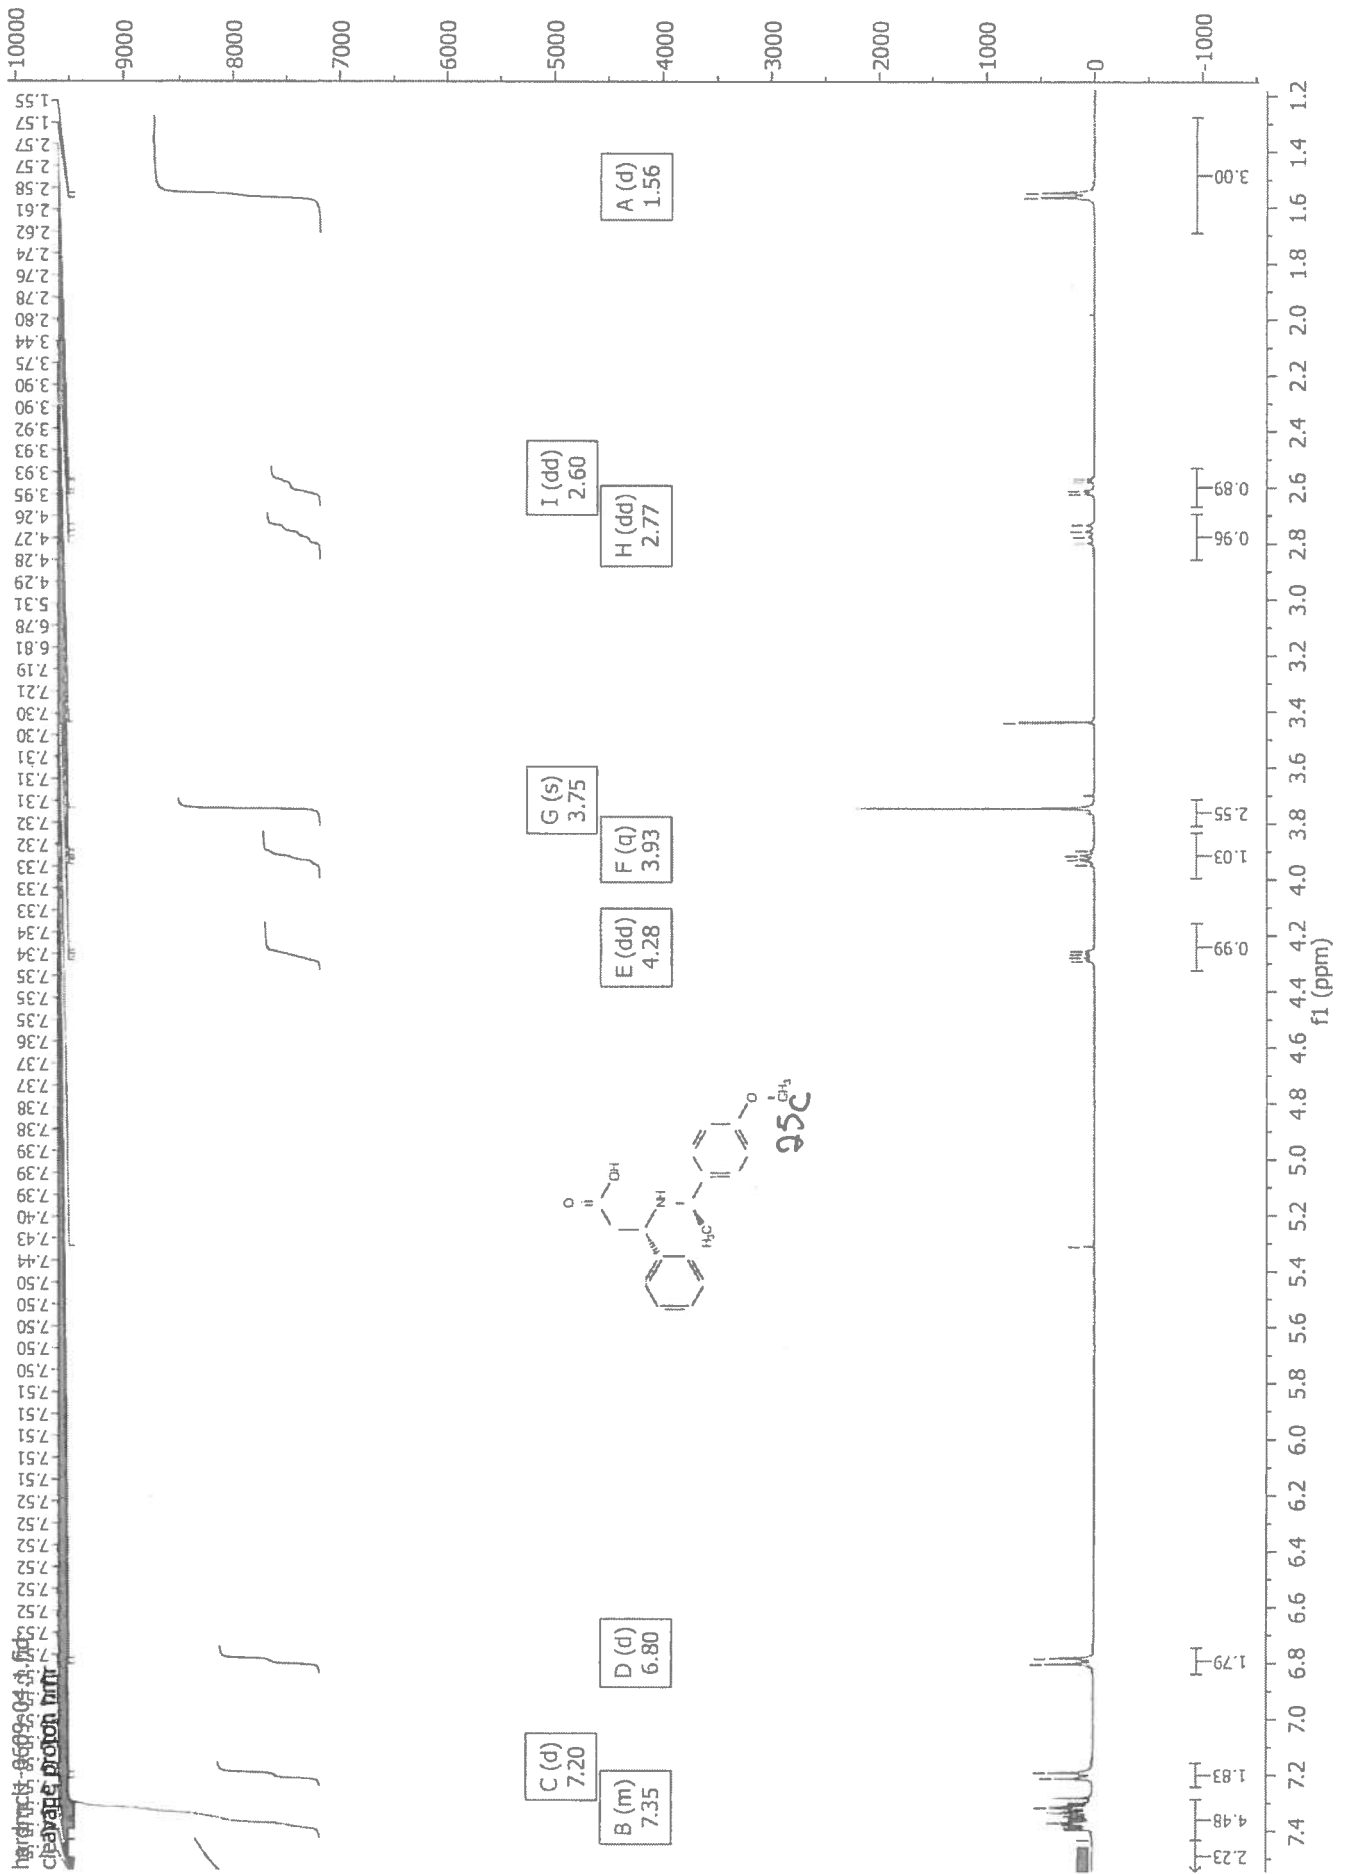



phe cleave dry2.fid  
 PROTON30-Cryp CDCl3 E:\ chardman 9

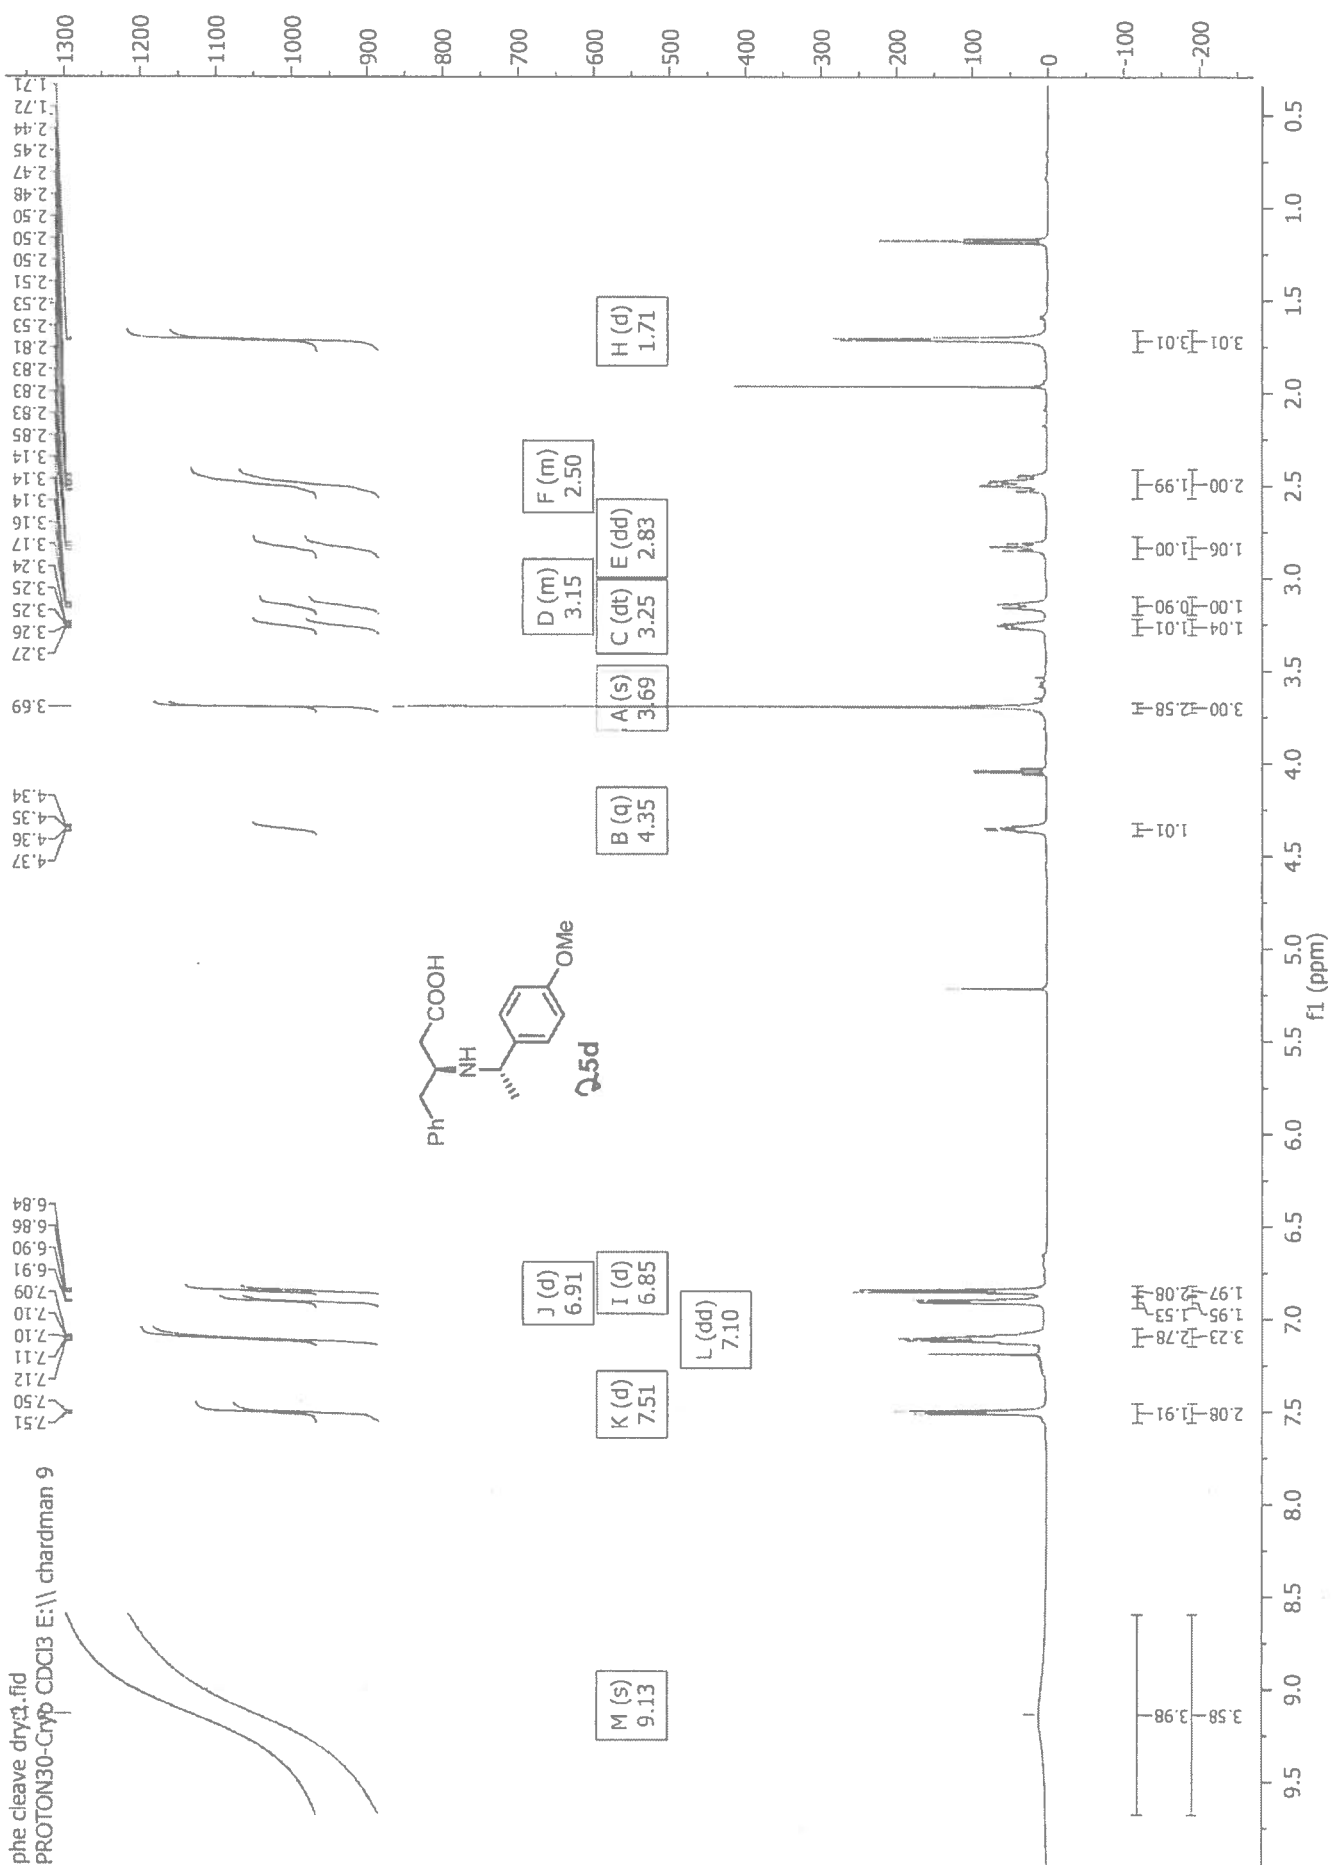

phe\_gleave dry.3.fid  
Carbon\_TCI CDCl3.d1 chardman 9

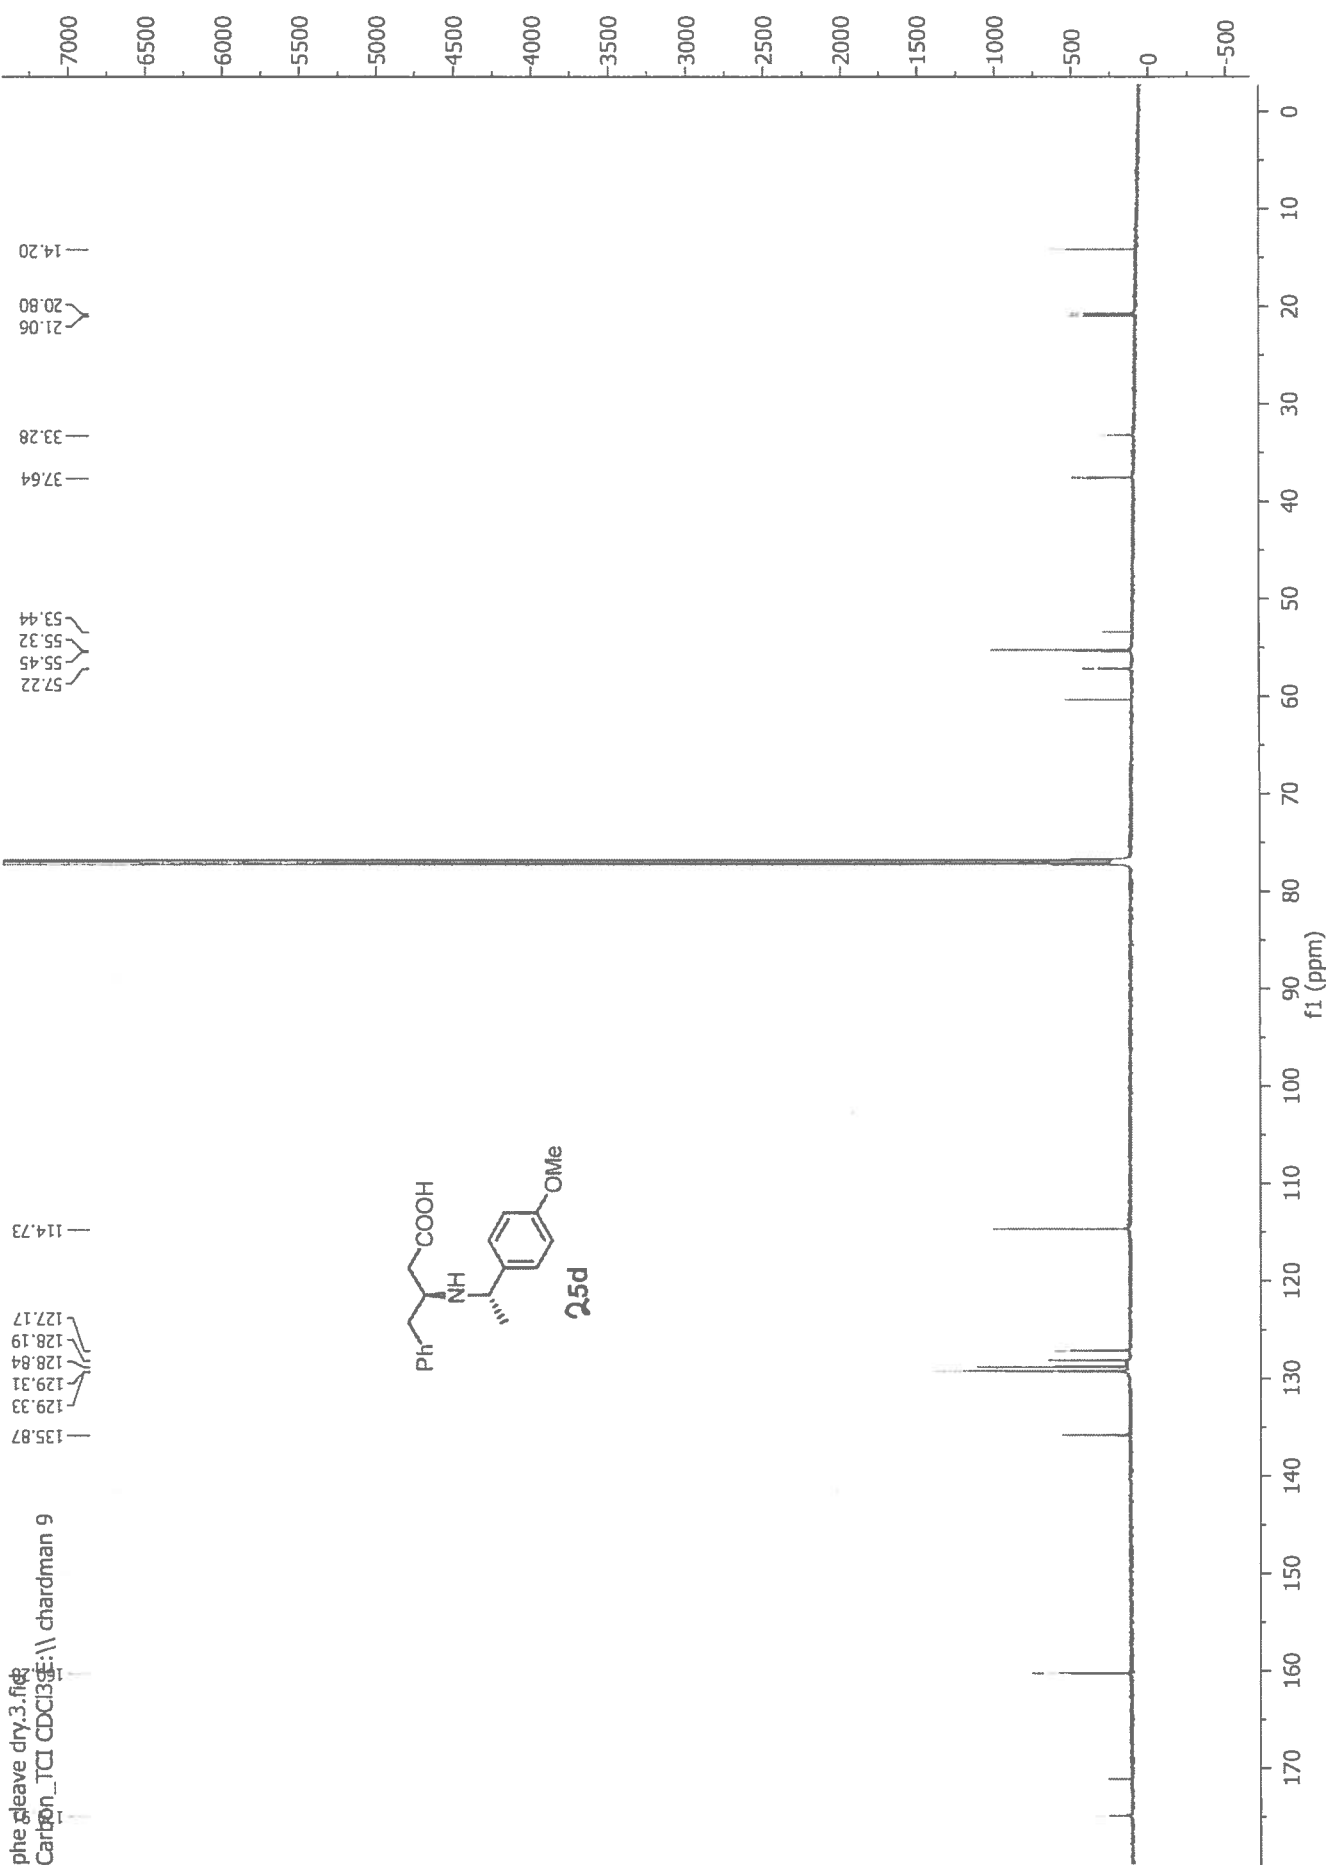

cbz-N-riptide AA chx (8888).fid  
 cbz-N-riptide AA g  
 PROTON30-Cryo CDC13 E:\\ chardman 16

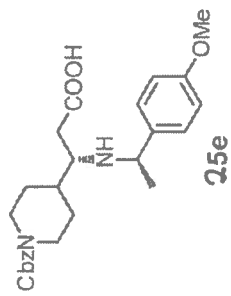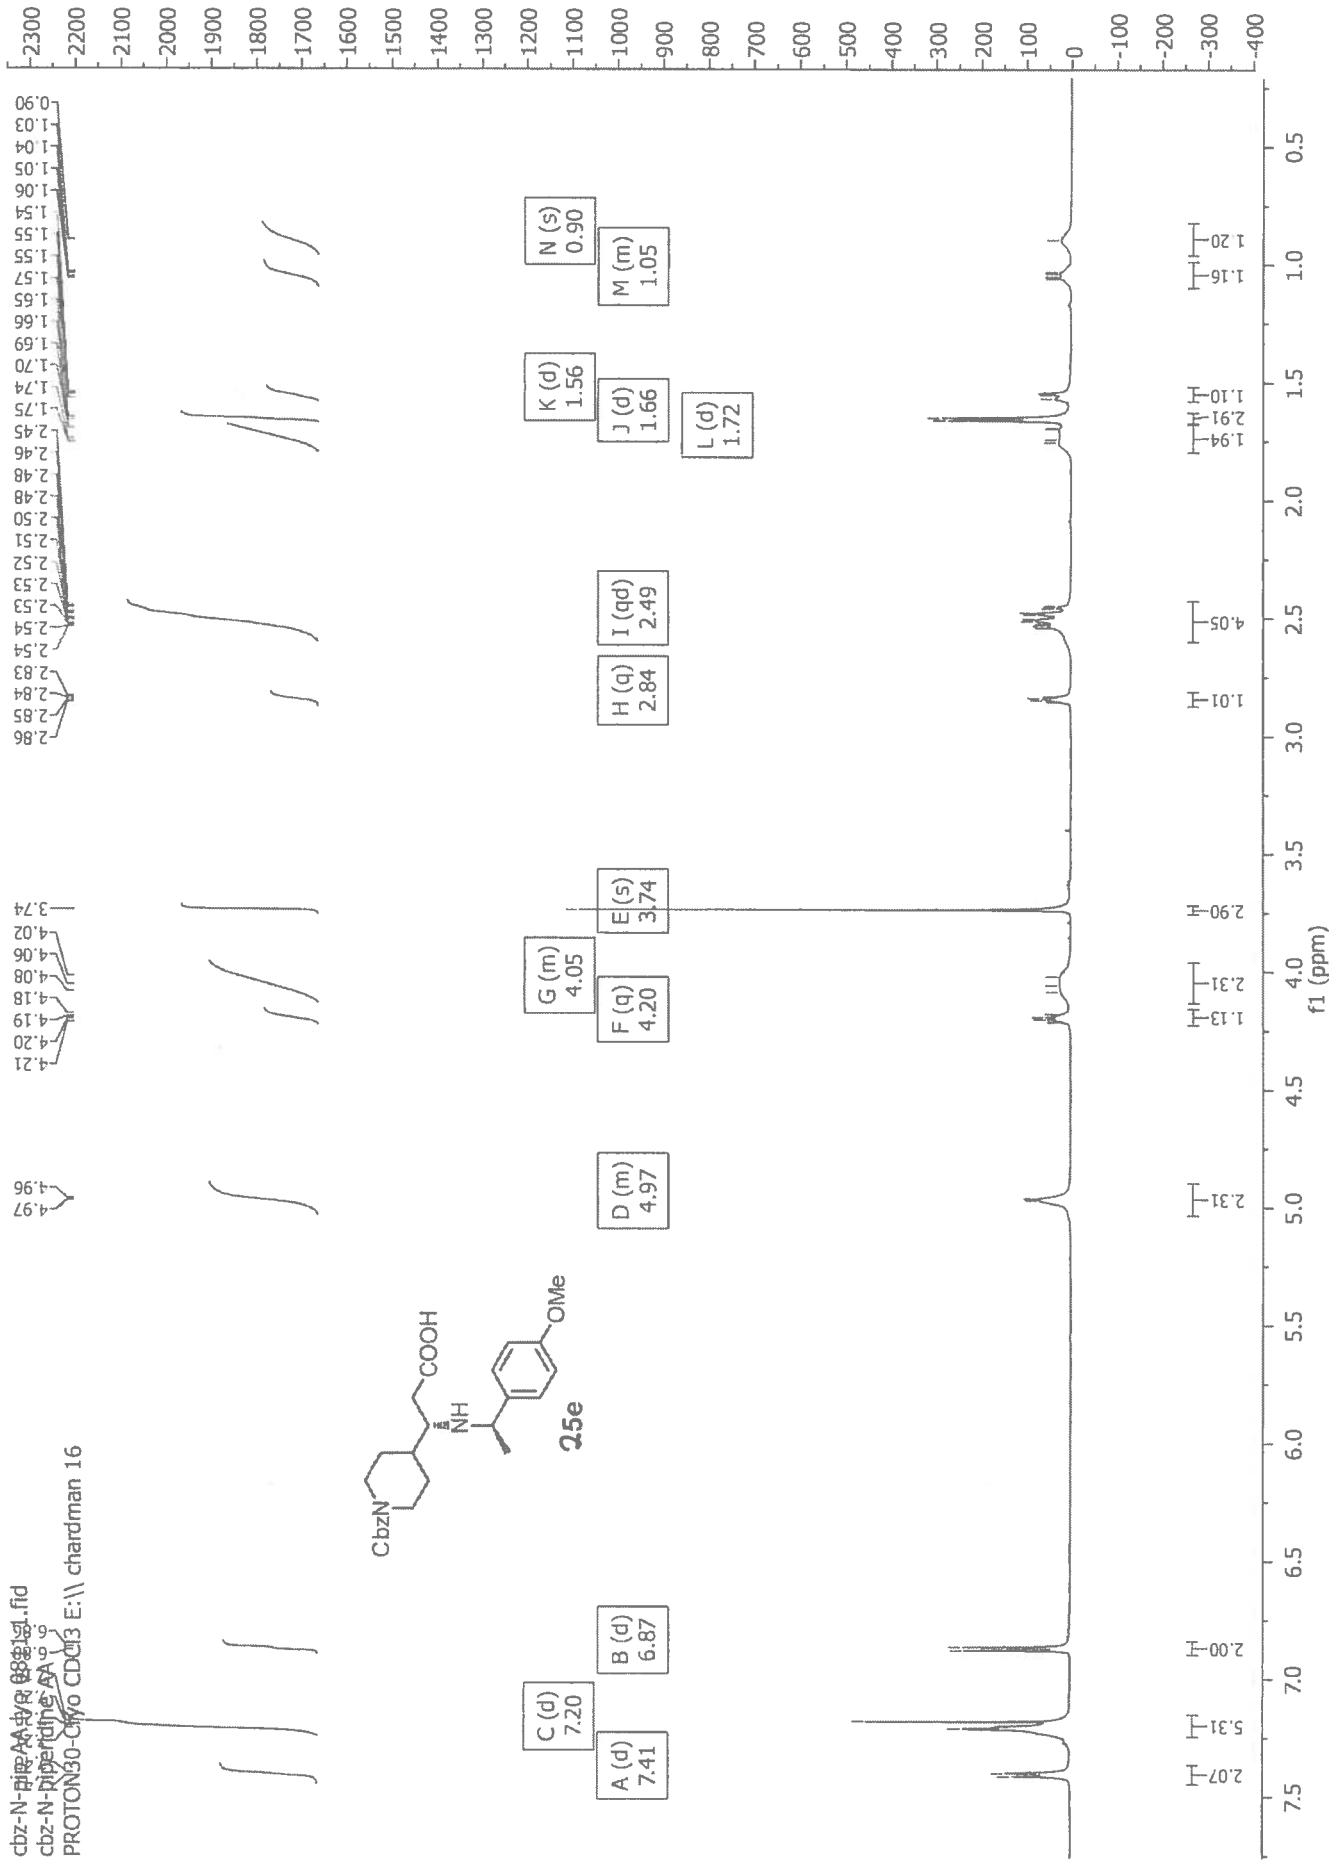

cbz-N-~~pp~~ AA lyo 081 12. f16  
cbz-N-~~pp~~iperidine AA  
CARBON\_TCI\_1024 CDCl3 F:\ chardman 16

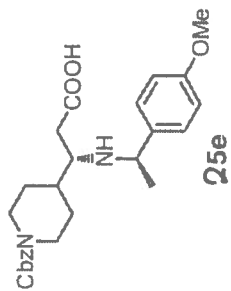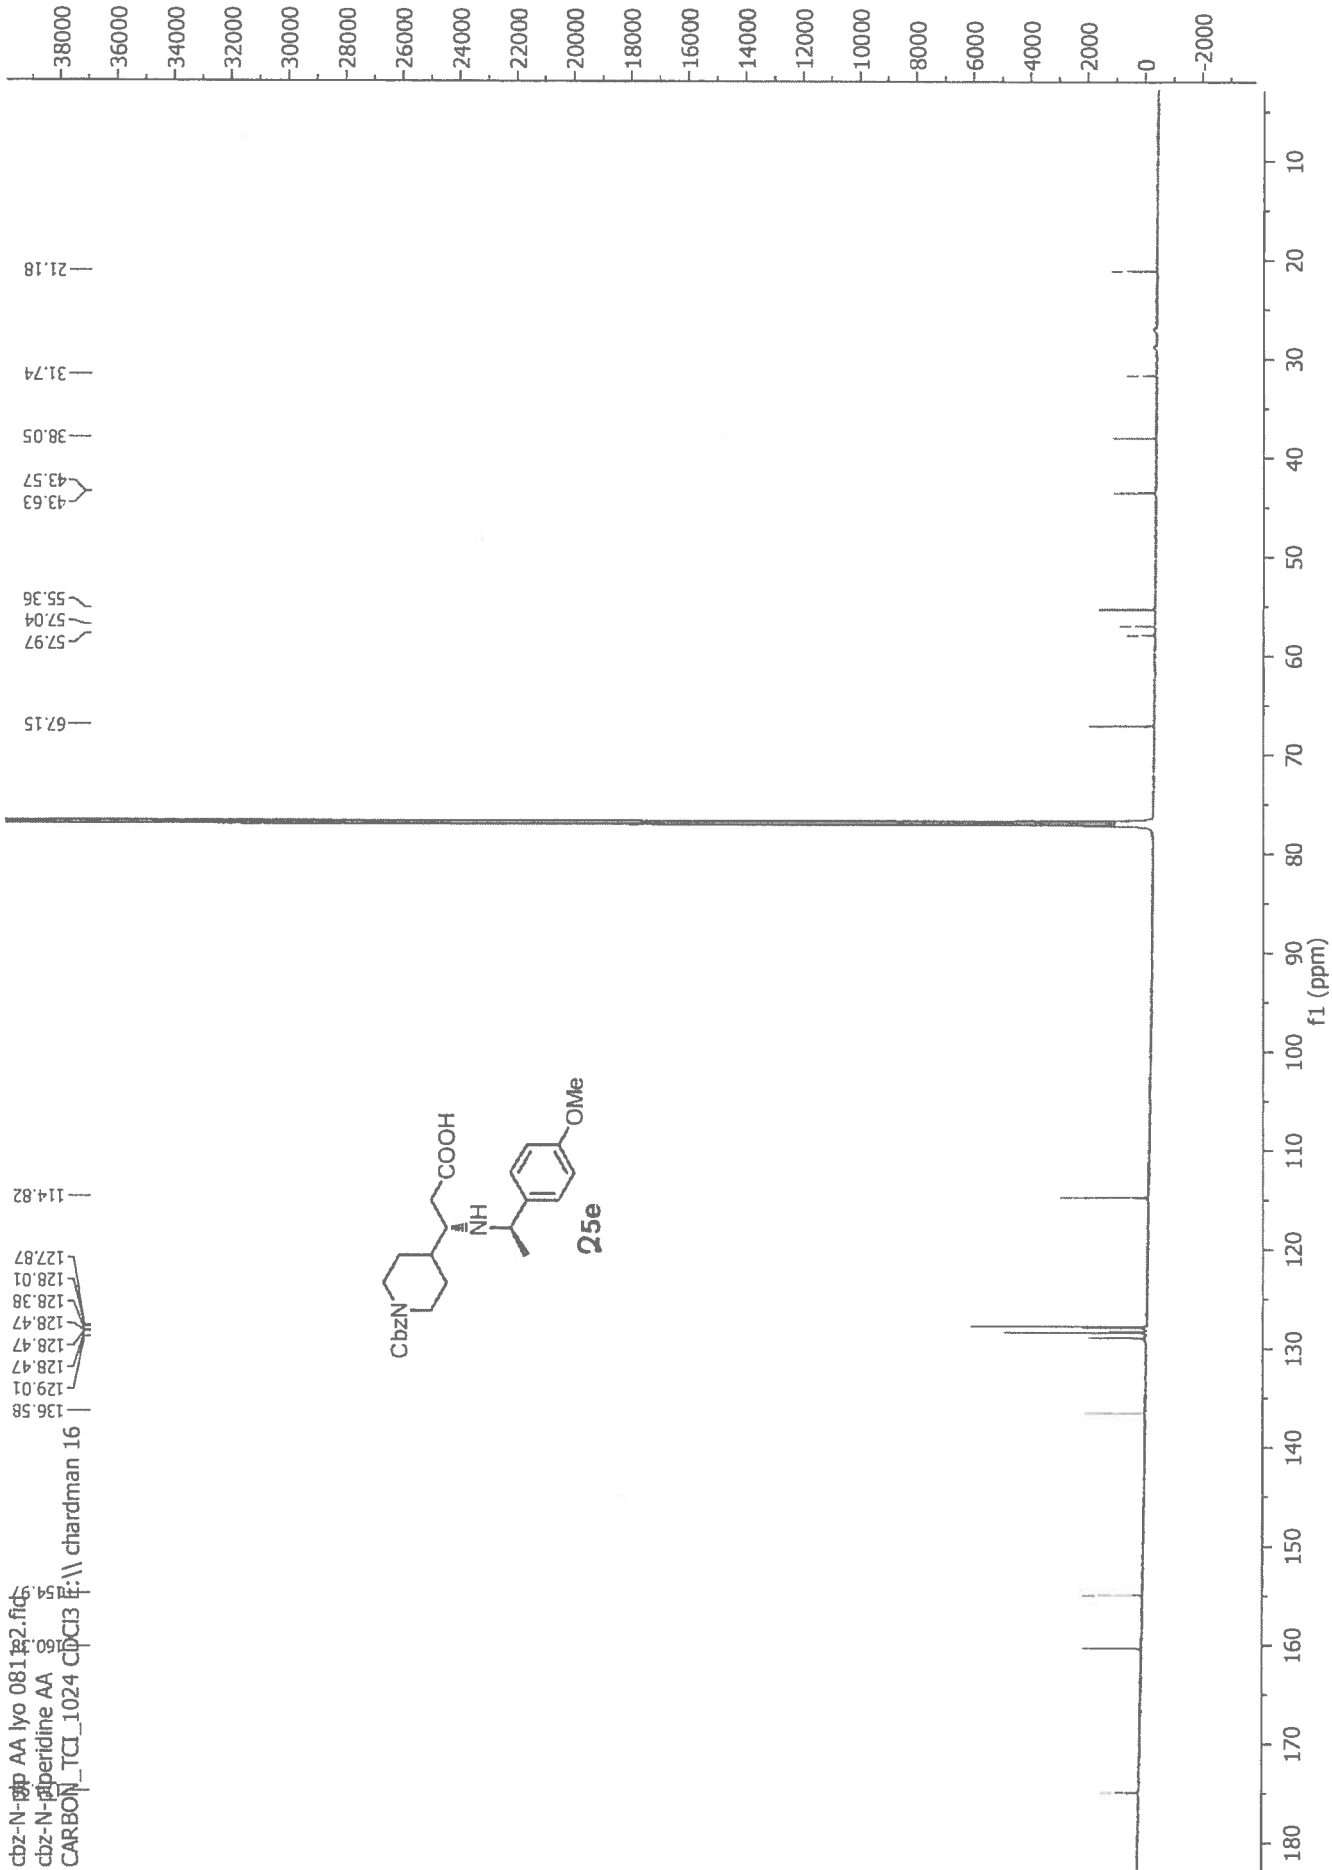

ethanol-d4  
 ester amino acid  
 PROTONS  
 CDCl3 E: chardman 6

4.37  
4.35  
4.32  
4.30  
3.98  
3.97  
3.96  
3.94  
3.72  
3.42  
3.41  
3.40  
3.39  
3.39  
3.38  
3.37  
3.36  
3.12  
3.11  
3.11  
3.10  
3.10  
3.09  
2.45  
2.43  
2.42  
2.33  
2.32  
2.29  
1.46  
1.44

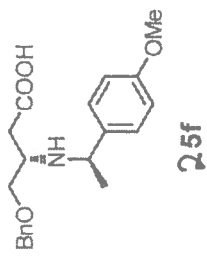

B (m) 7.20  
A (d) 6.81

C (m) 4.35

D (q) 3.96

F (qd) 3.39

H (dd) 2.44

J (d) 1.45

G (td) 3.11

I (dd) 2.31

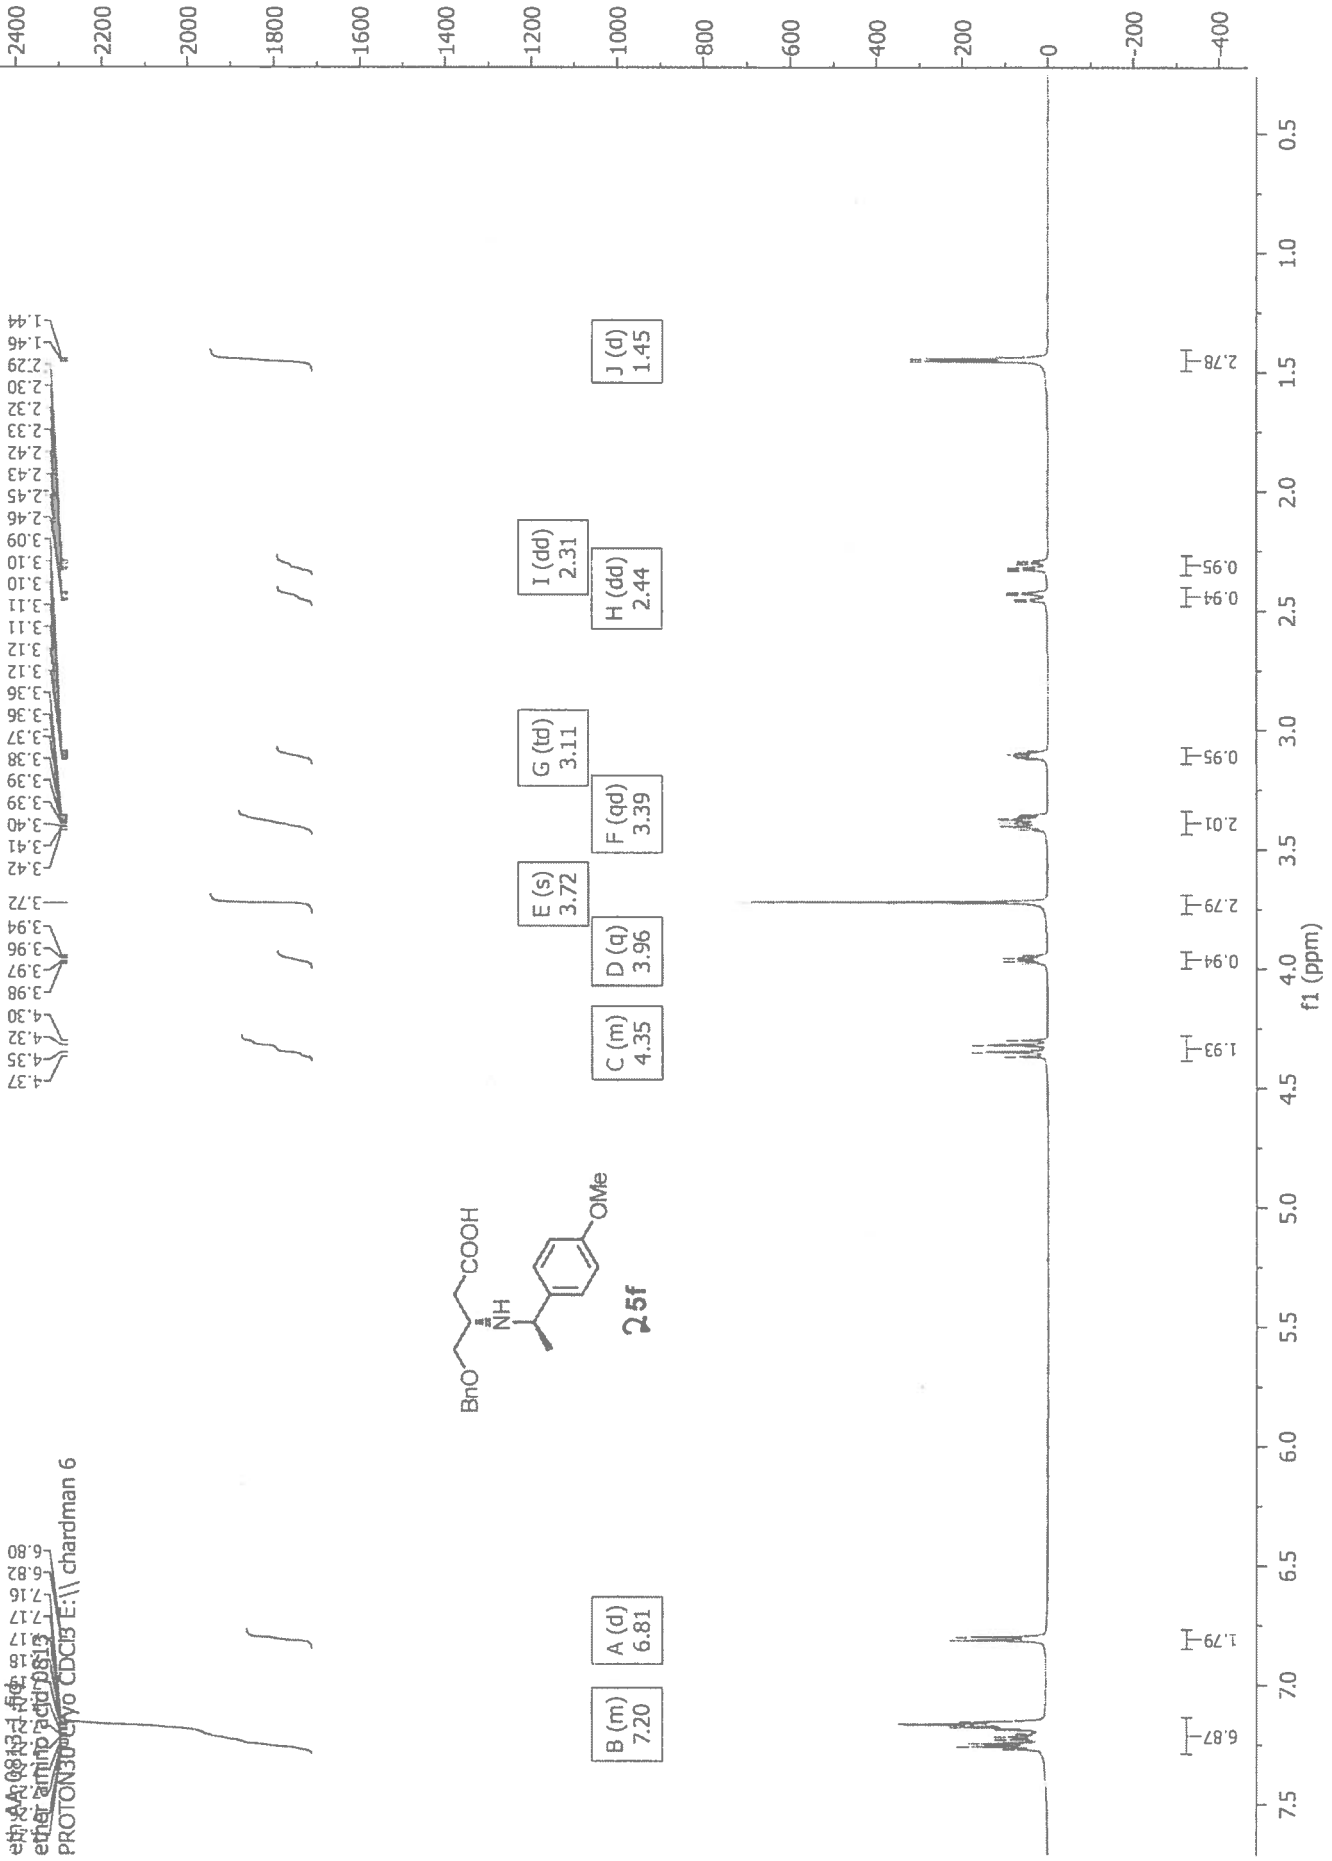

6.87  
1.79

1.93  
0.94  
2.79  
2.01  
0.95

2.78

eth SA 0813.2.fid  
ether amino acid 0813  
CARBON\_TCI\_1024 CDCl3 E:\ chardman 6

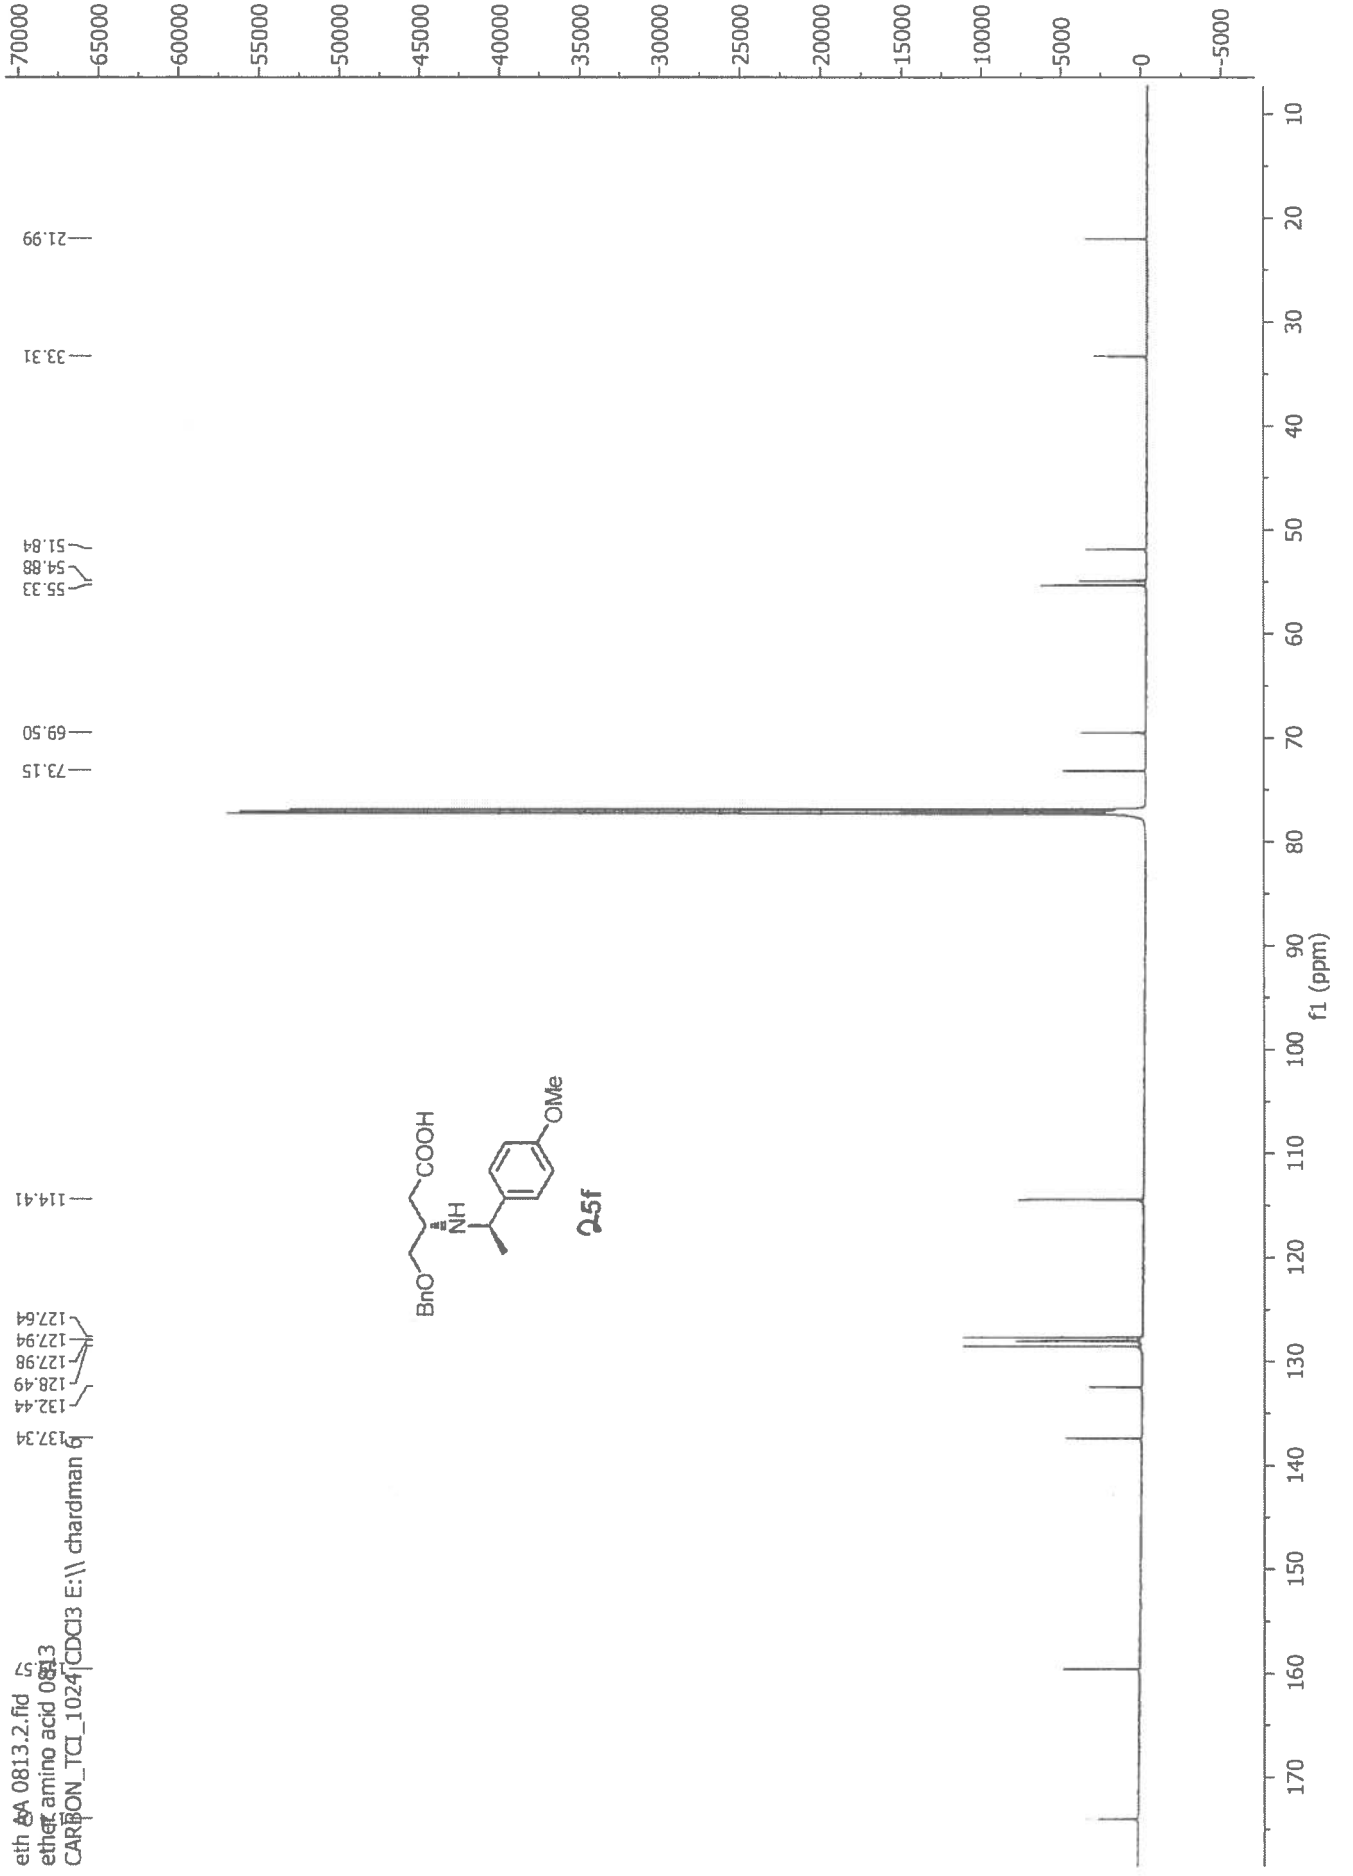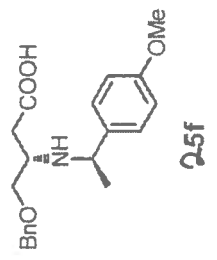

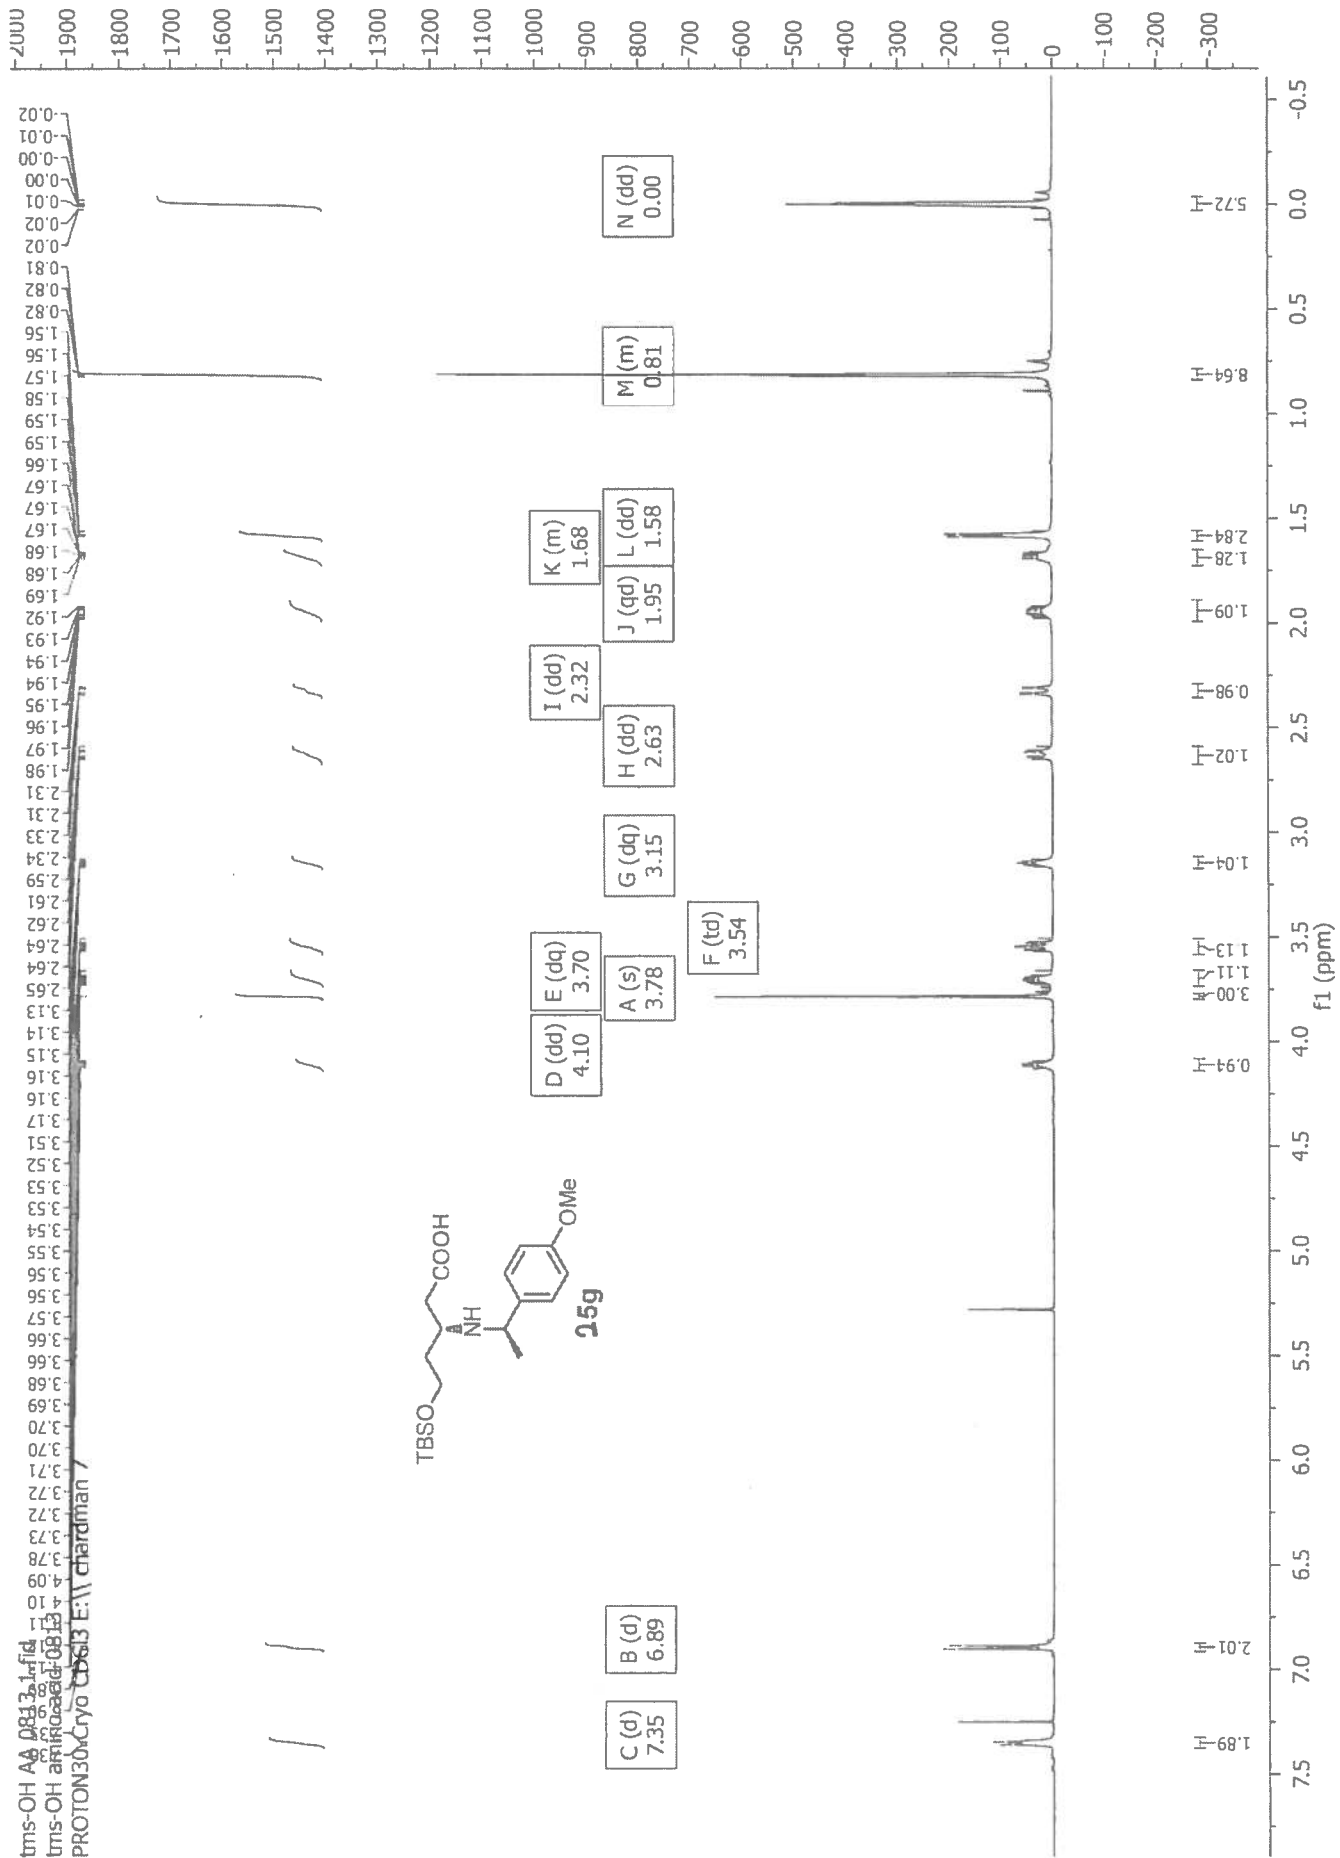

tms-<sup>13</sup>C AA 0813.2.fid  
tms-<sup>13</sup>C amino aci 0813  
CARBON\_TCL\_1024 CDCl3 E:\\ chardman 7

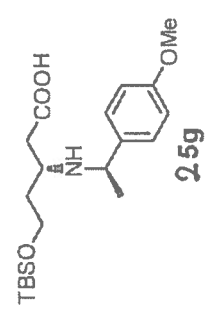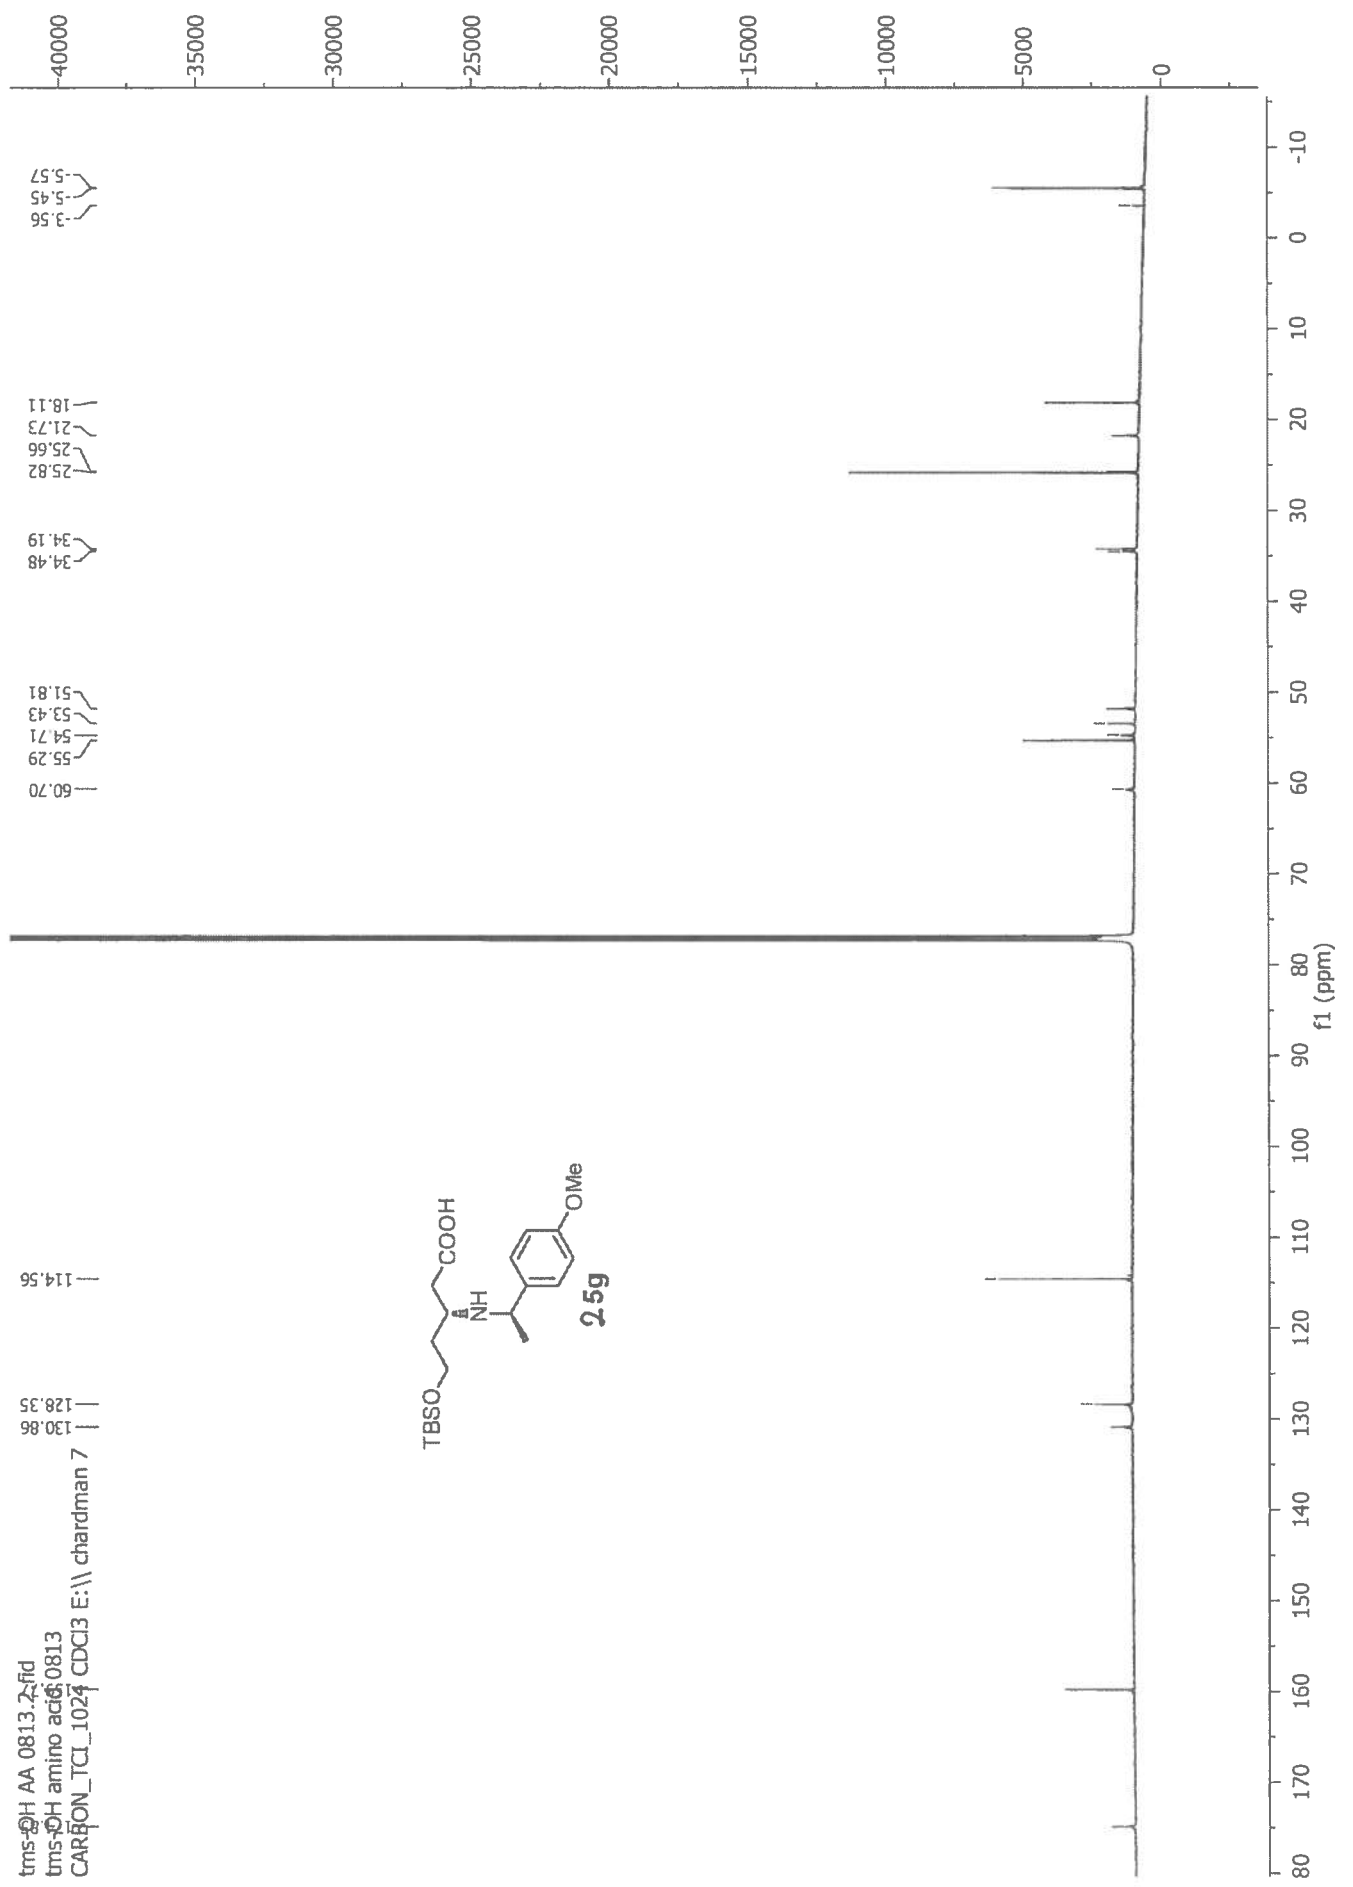



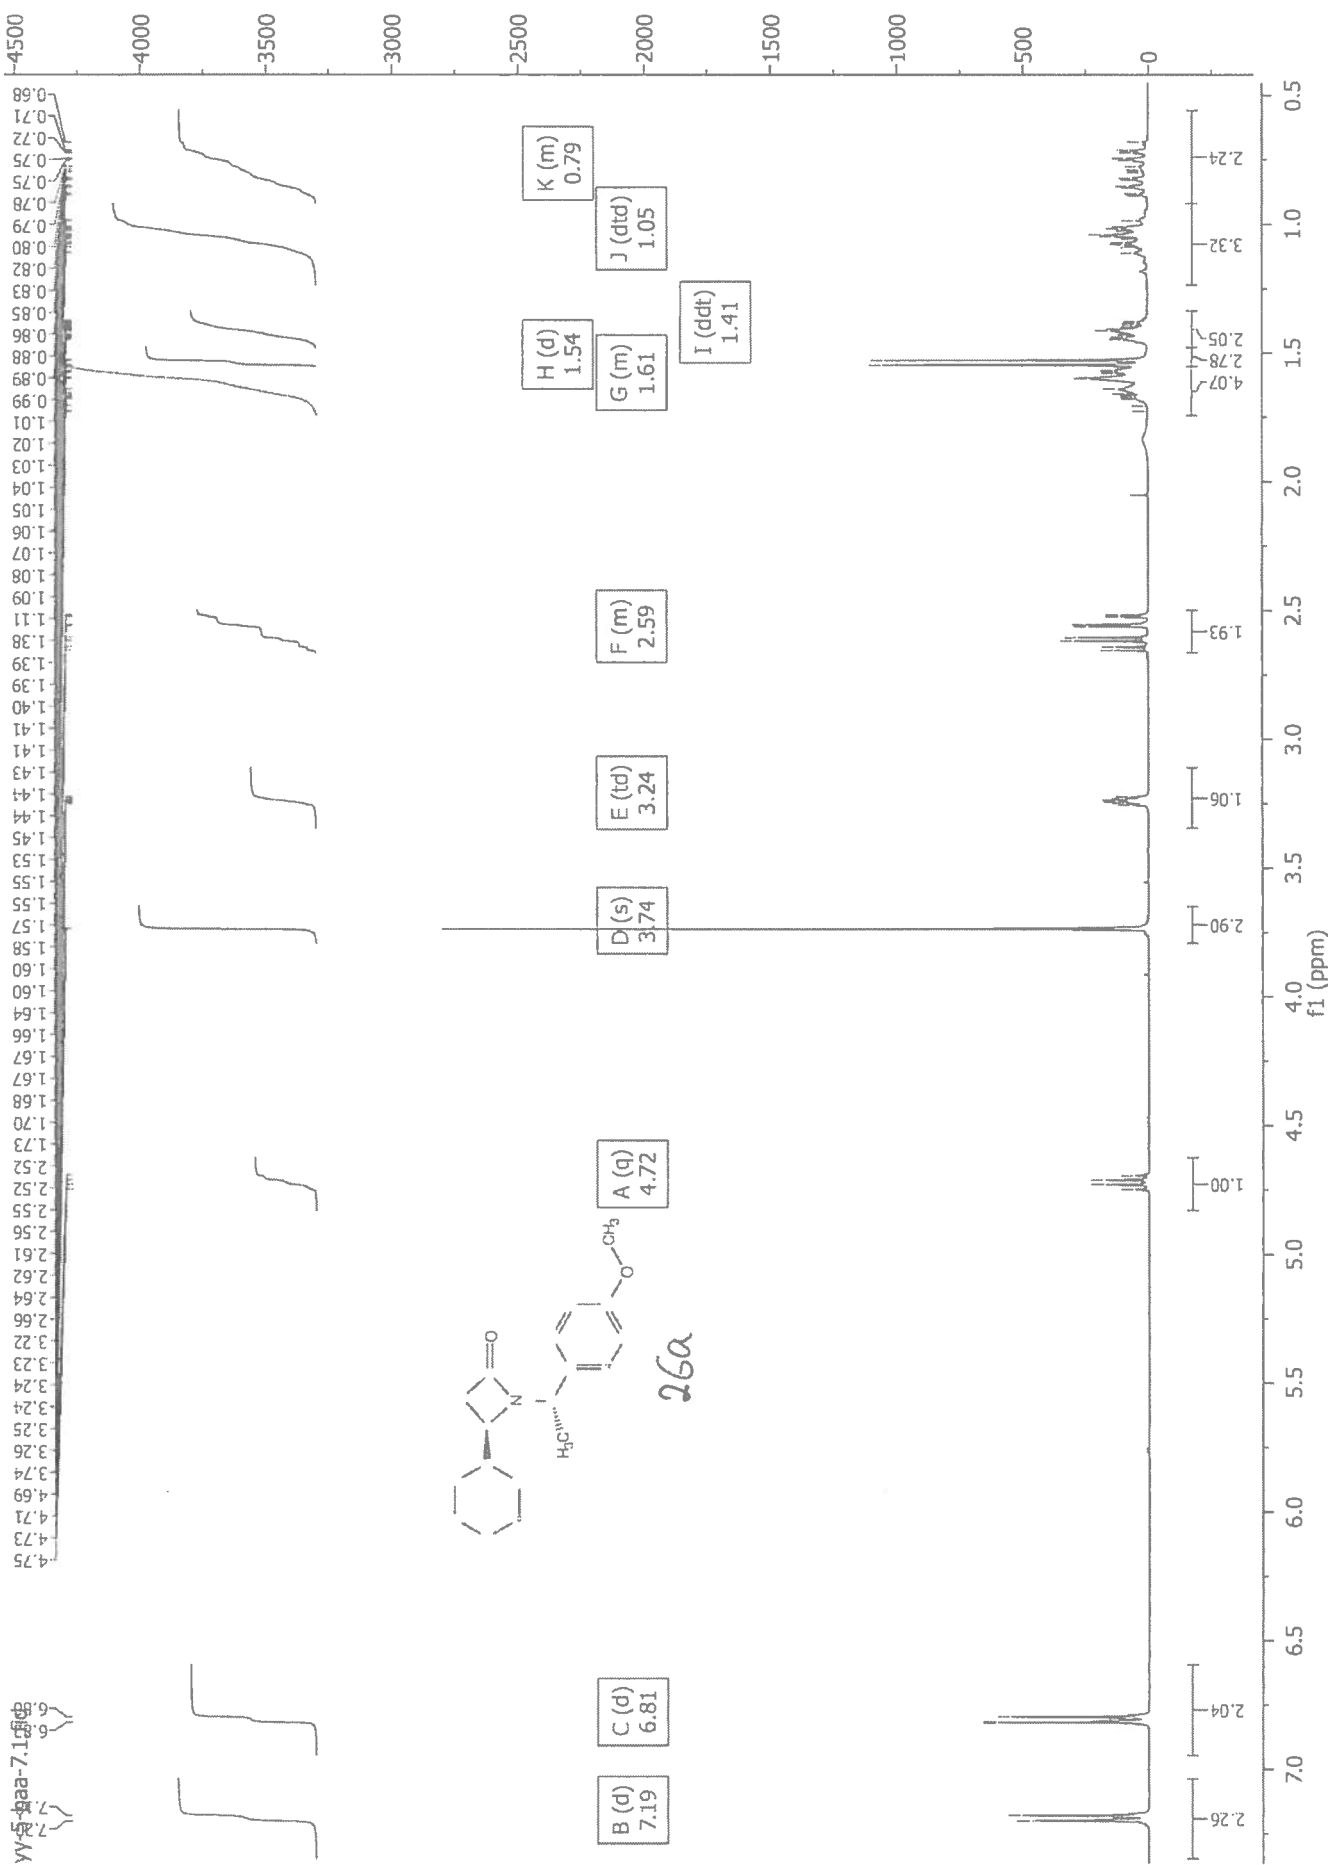

yy-5-baa-7.2.tif

167.8  
158.9

132.84

128.22

113.89

56.18  
55.28  
52.21

39.68  
37.48

29.71  
26.38  
26.03  
25.89  
25.68  
19.51

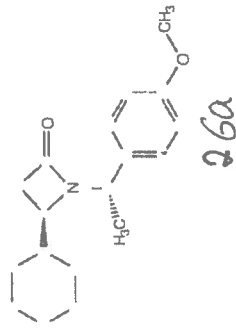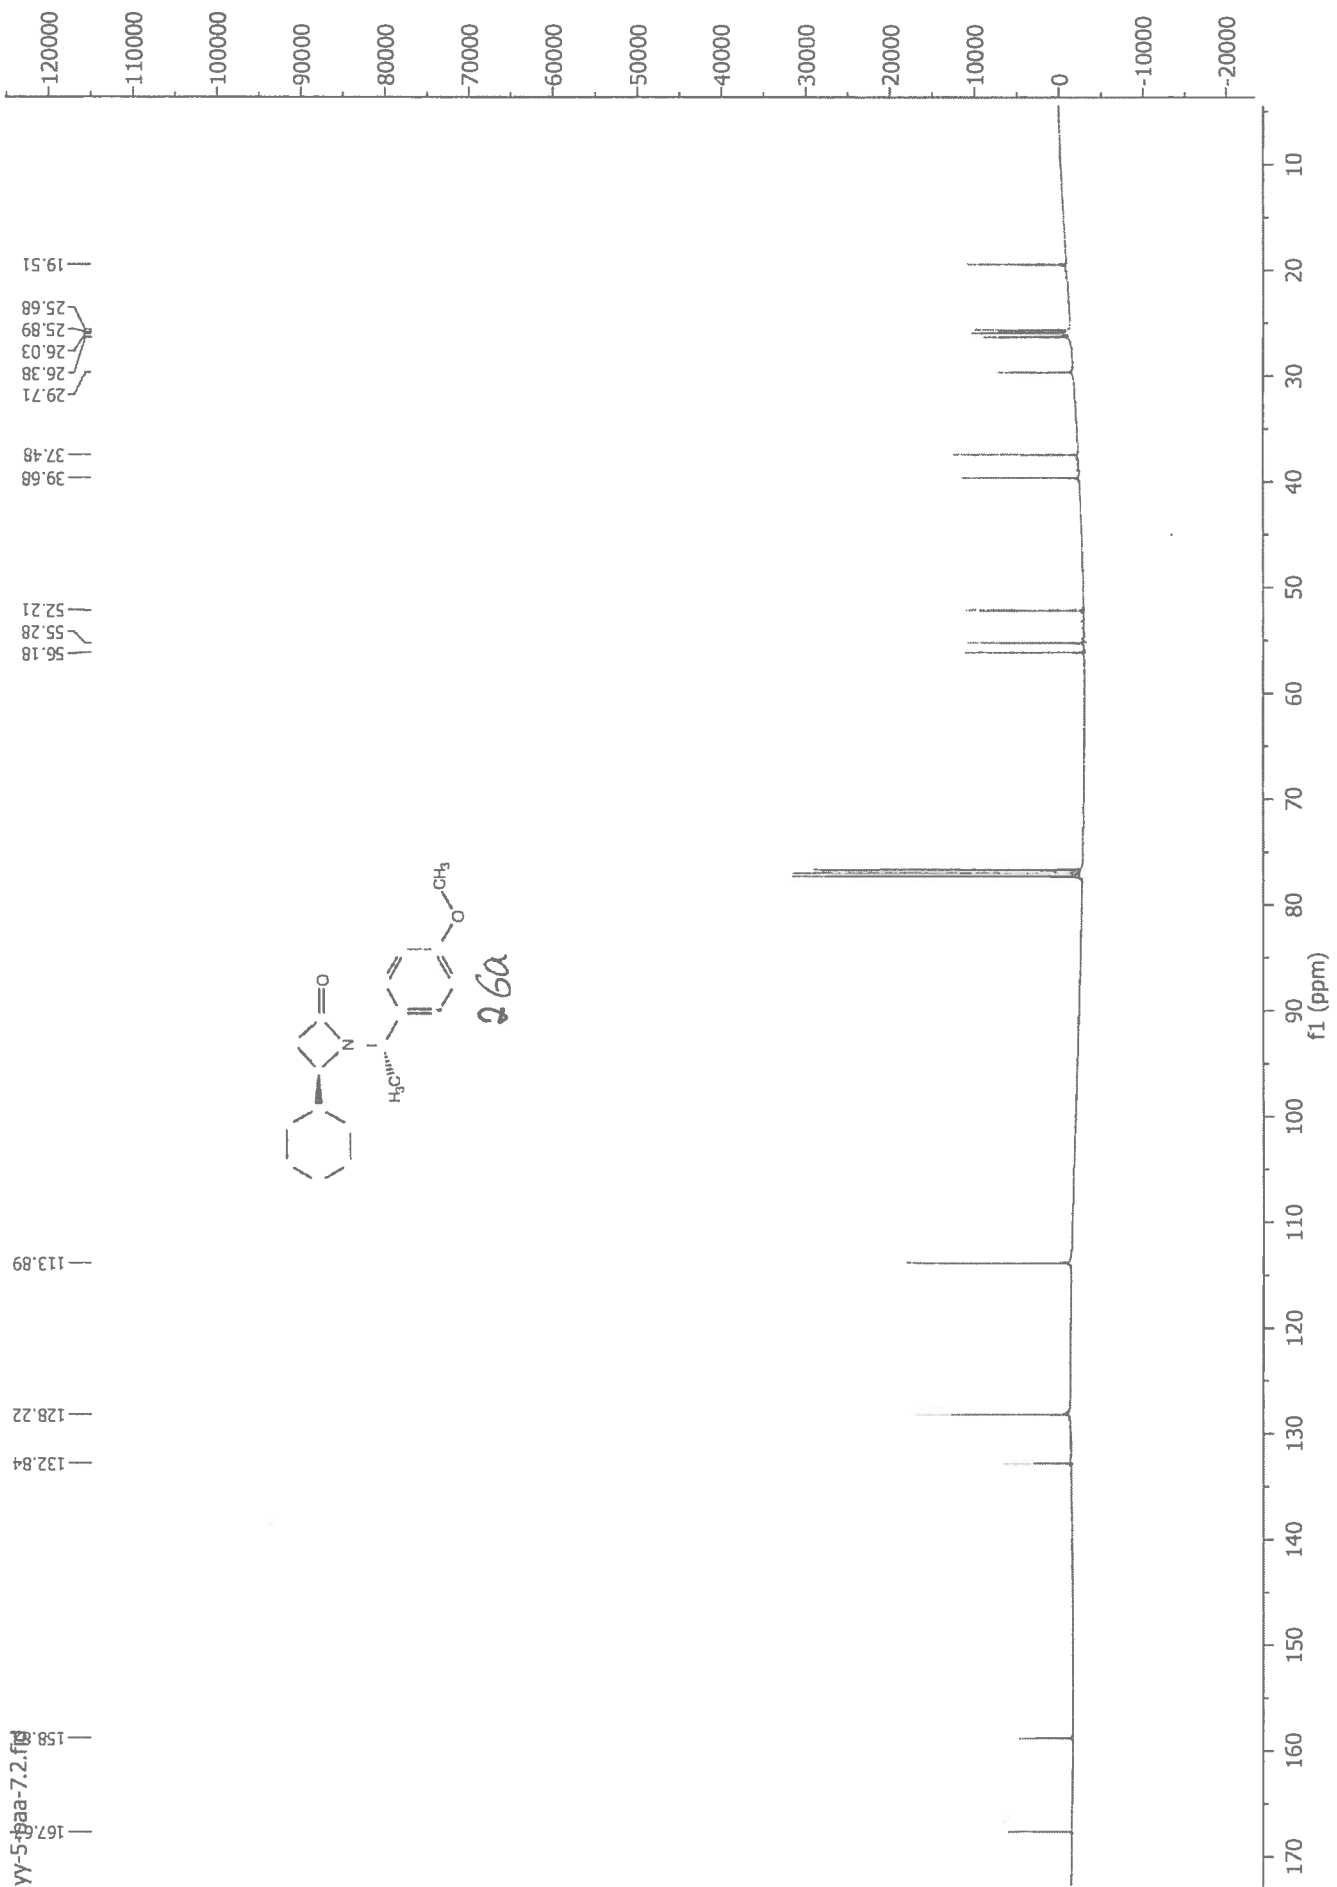

hexclastone 08061511et  
 hexentelracone 08061511et  
 PROTON30-Cryo CDCl3 E:\ chardman 5

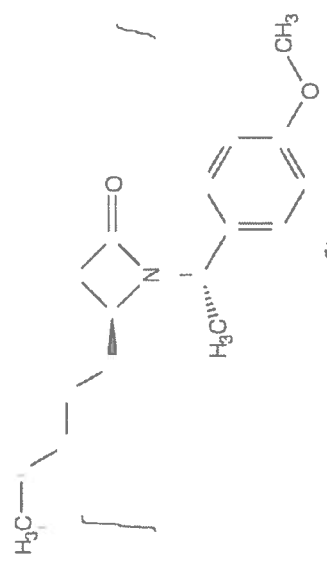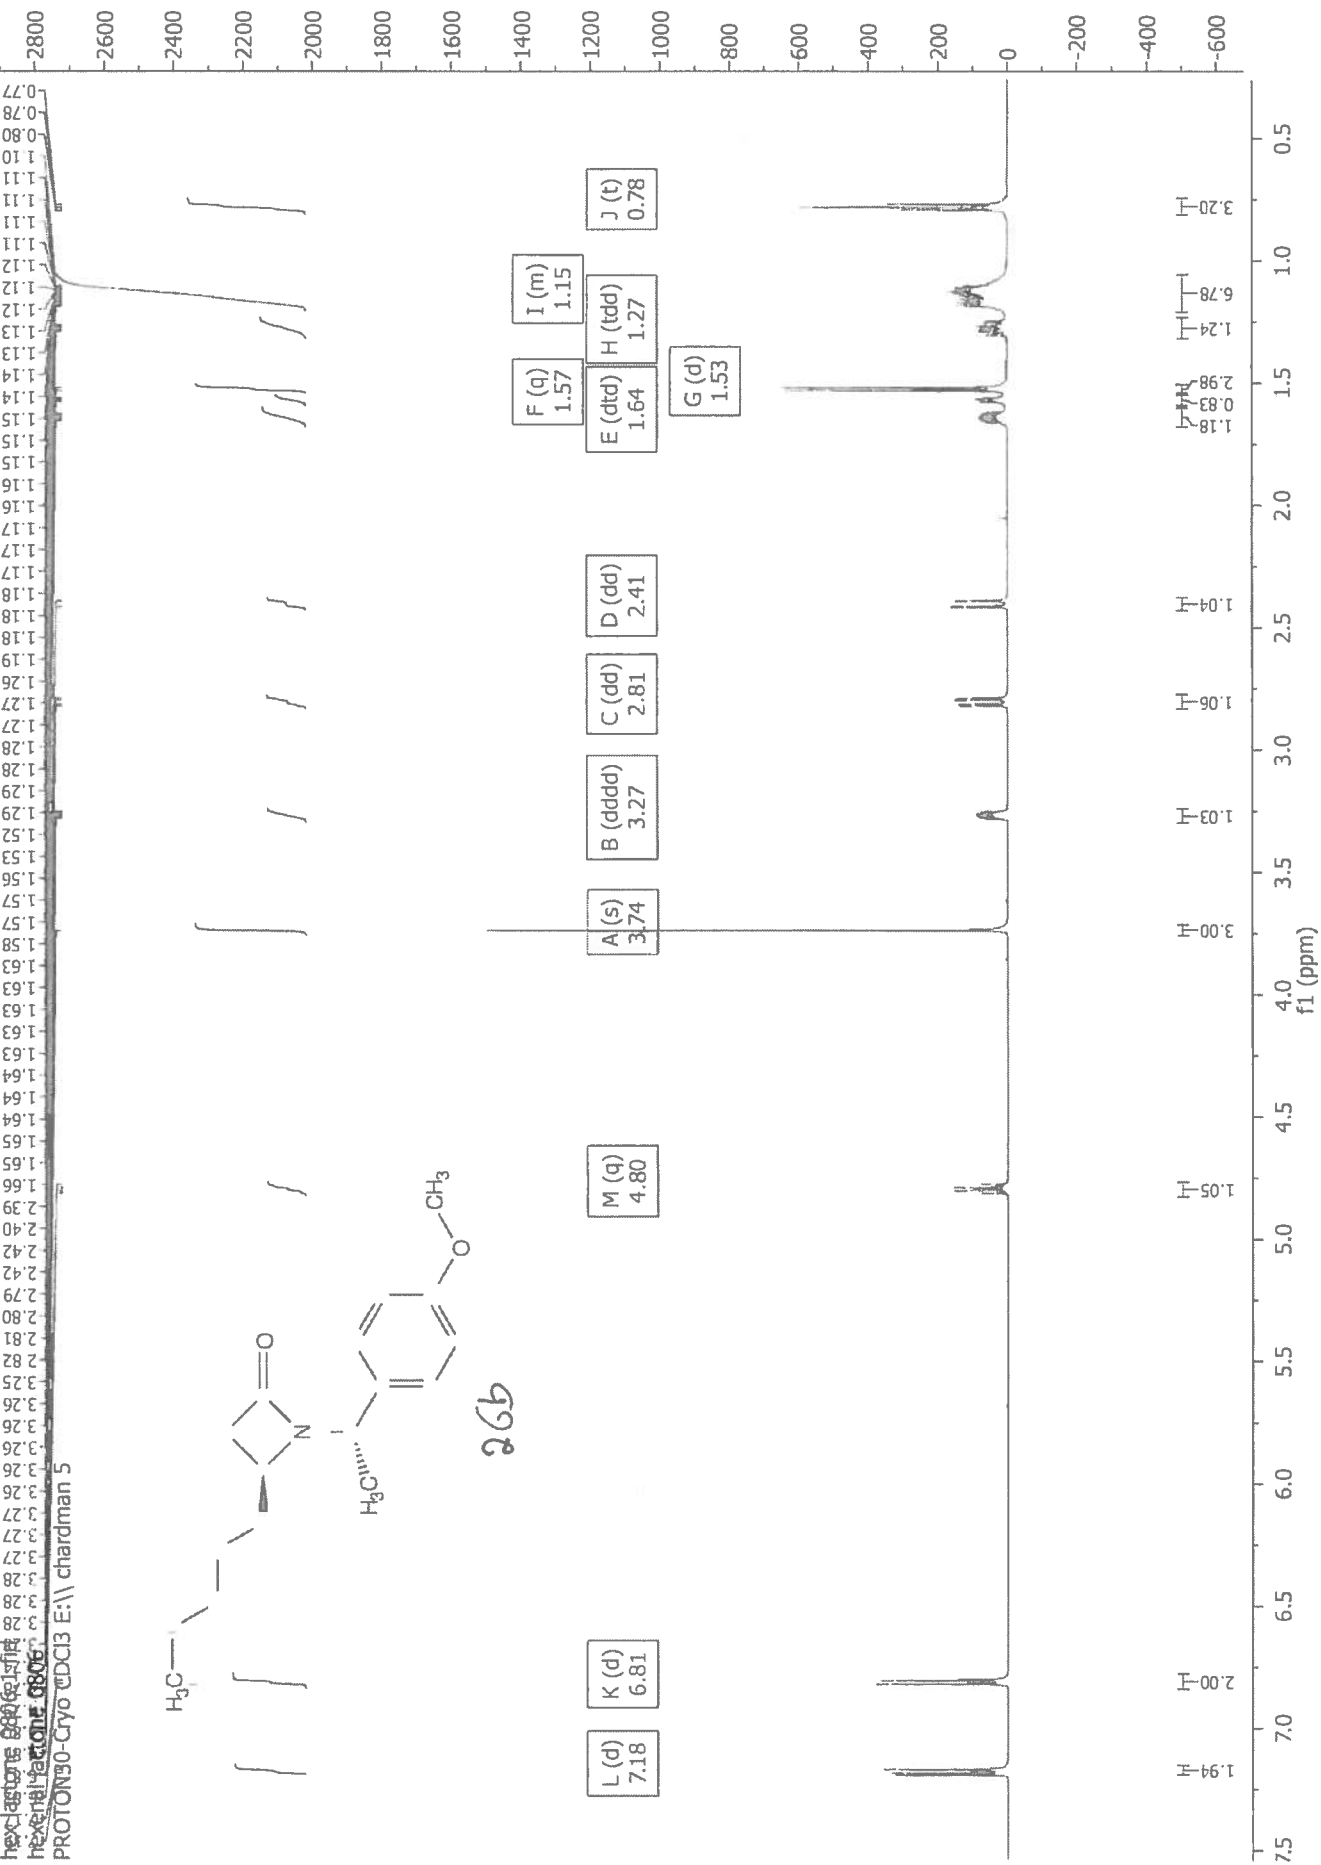

hex:lactone 0806.2.fid  
hex:lactone 0806  
Carbpn\_TCI CDCl3 E:\\ chardman 5

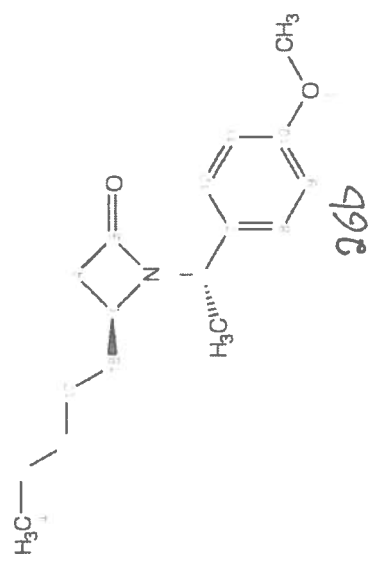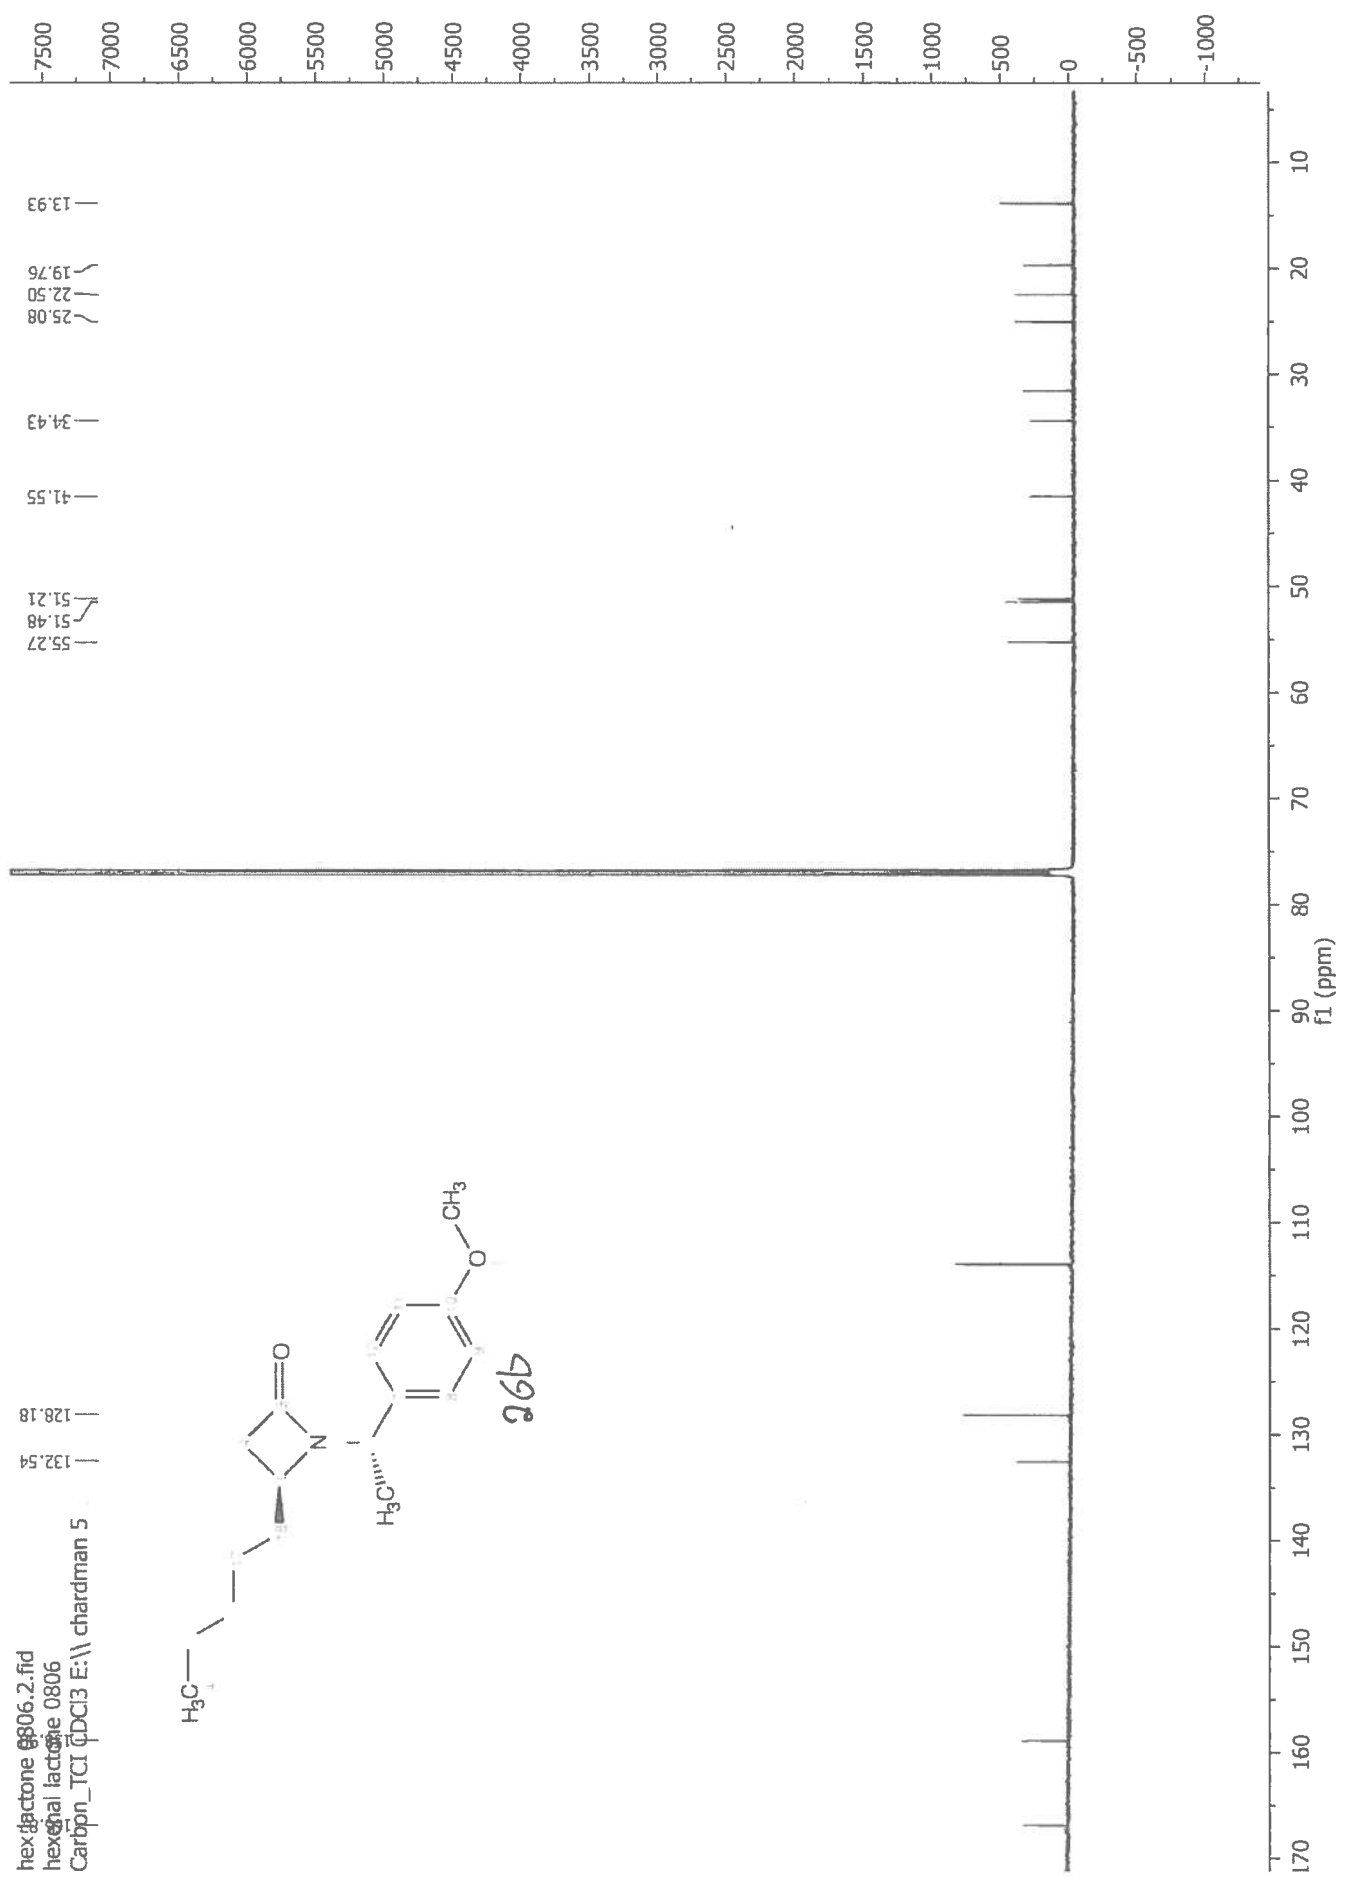

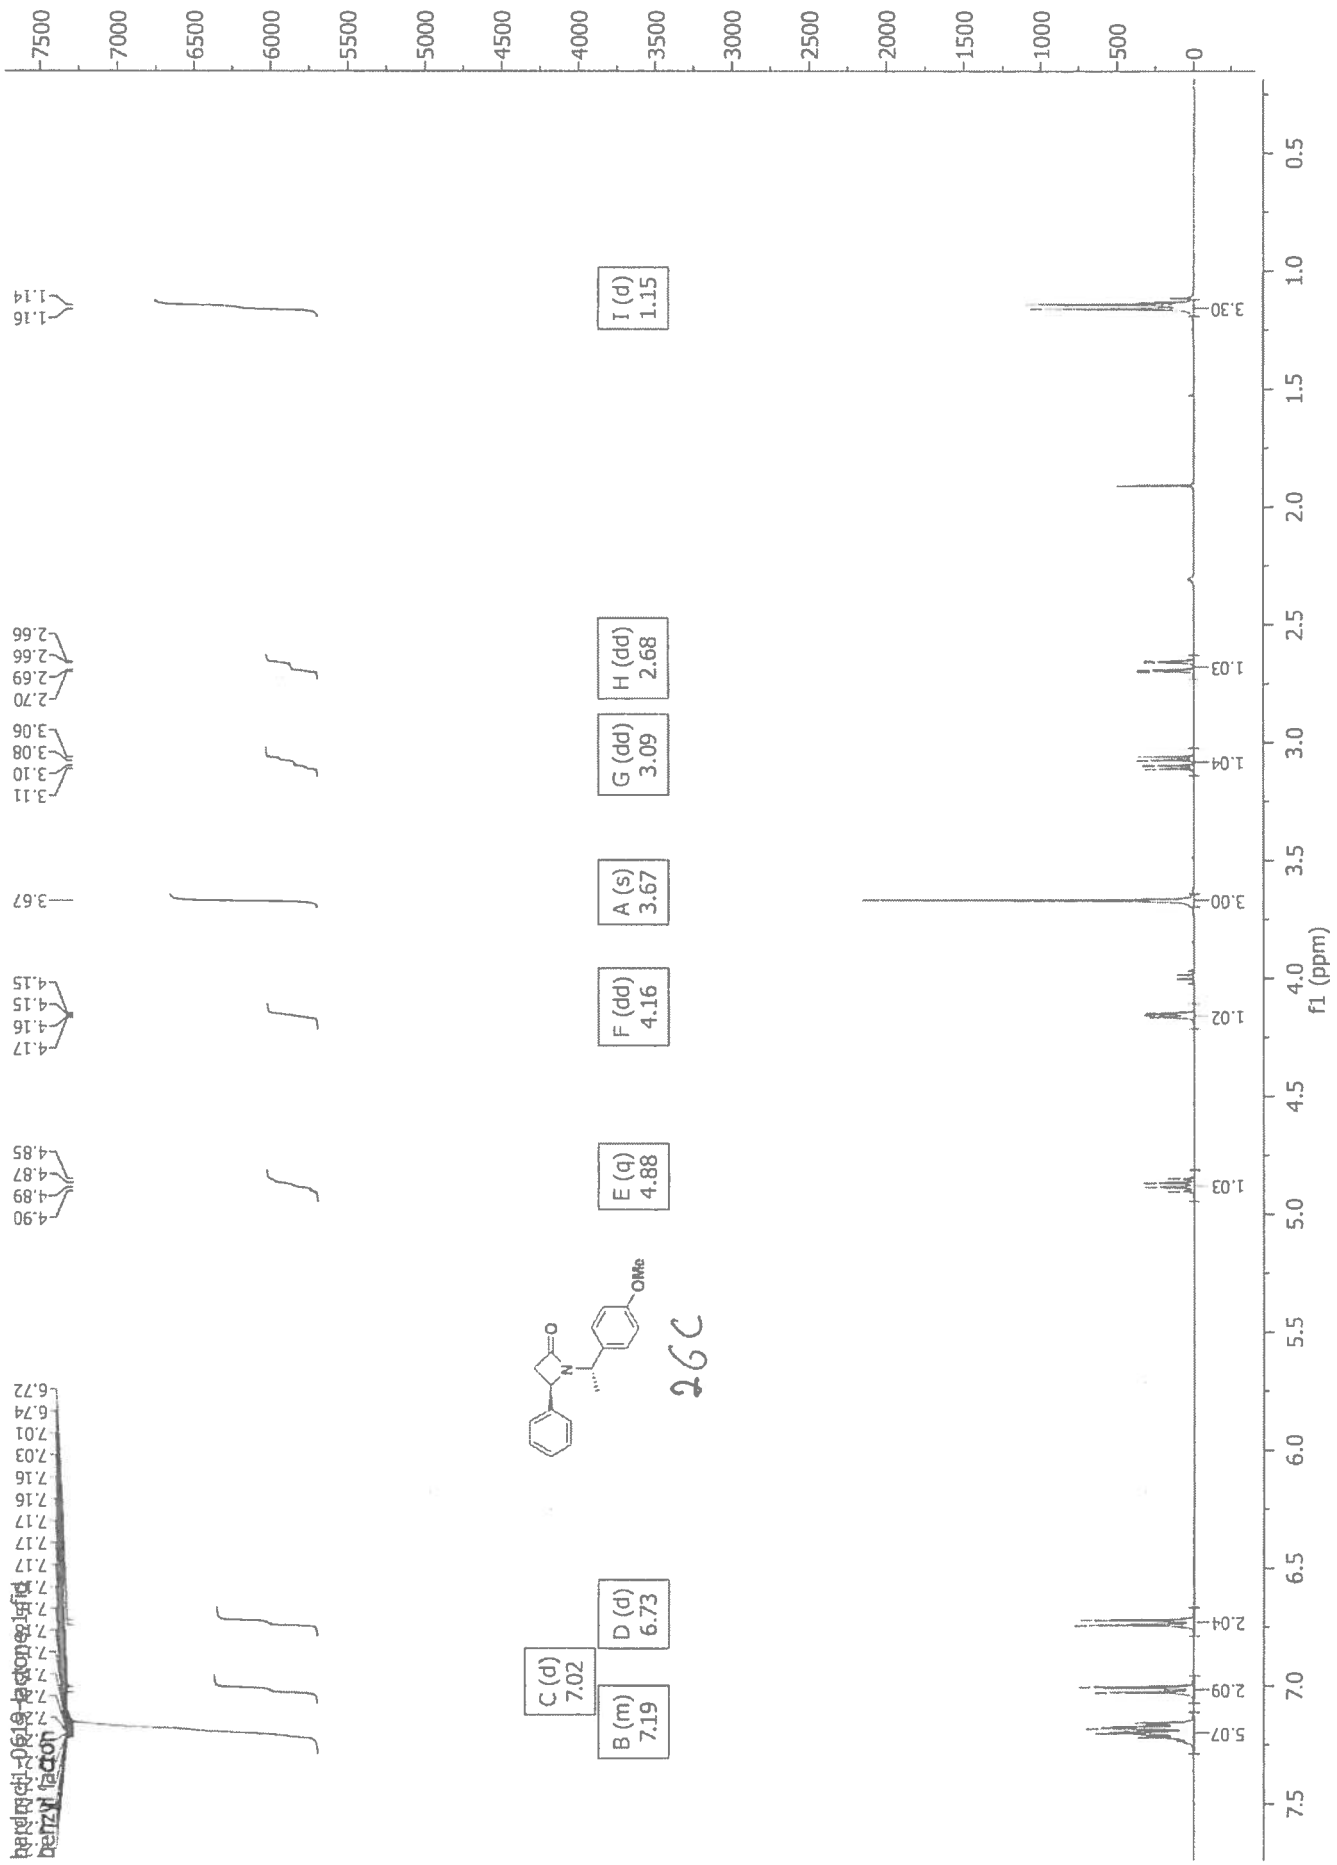

26C

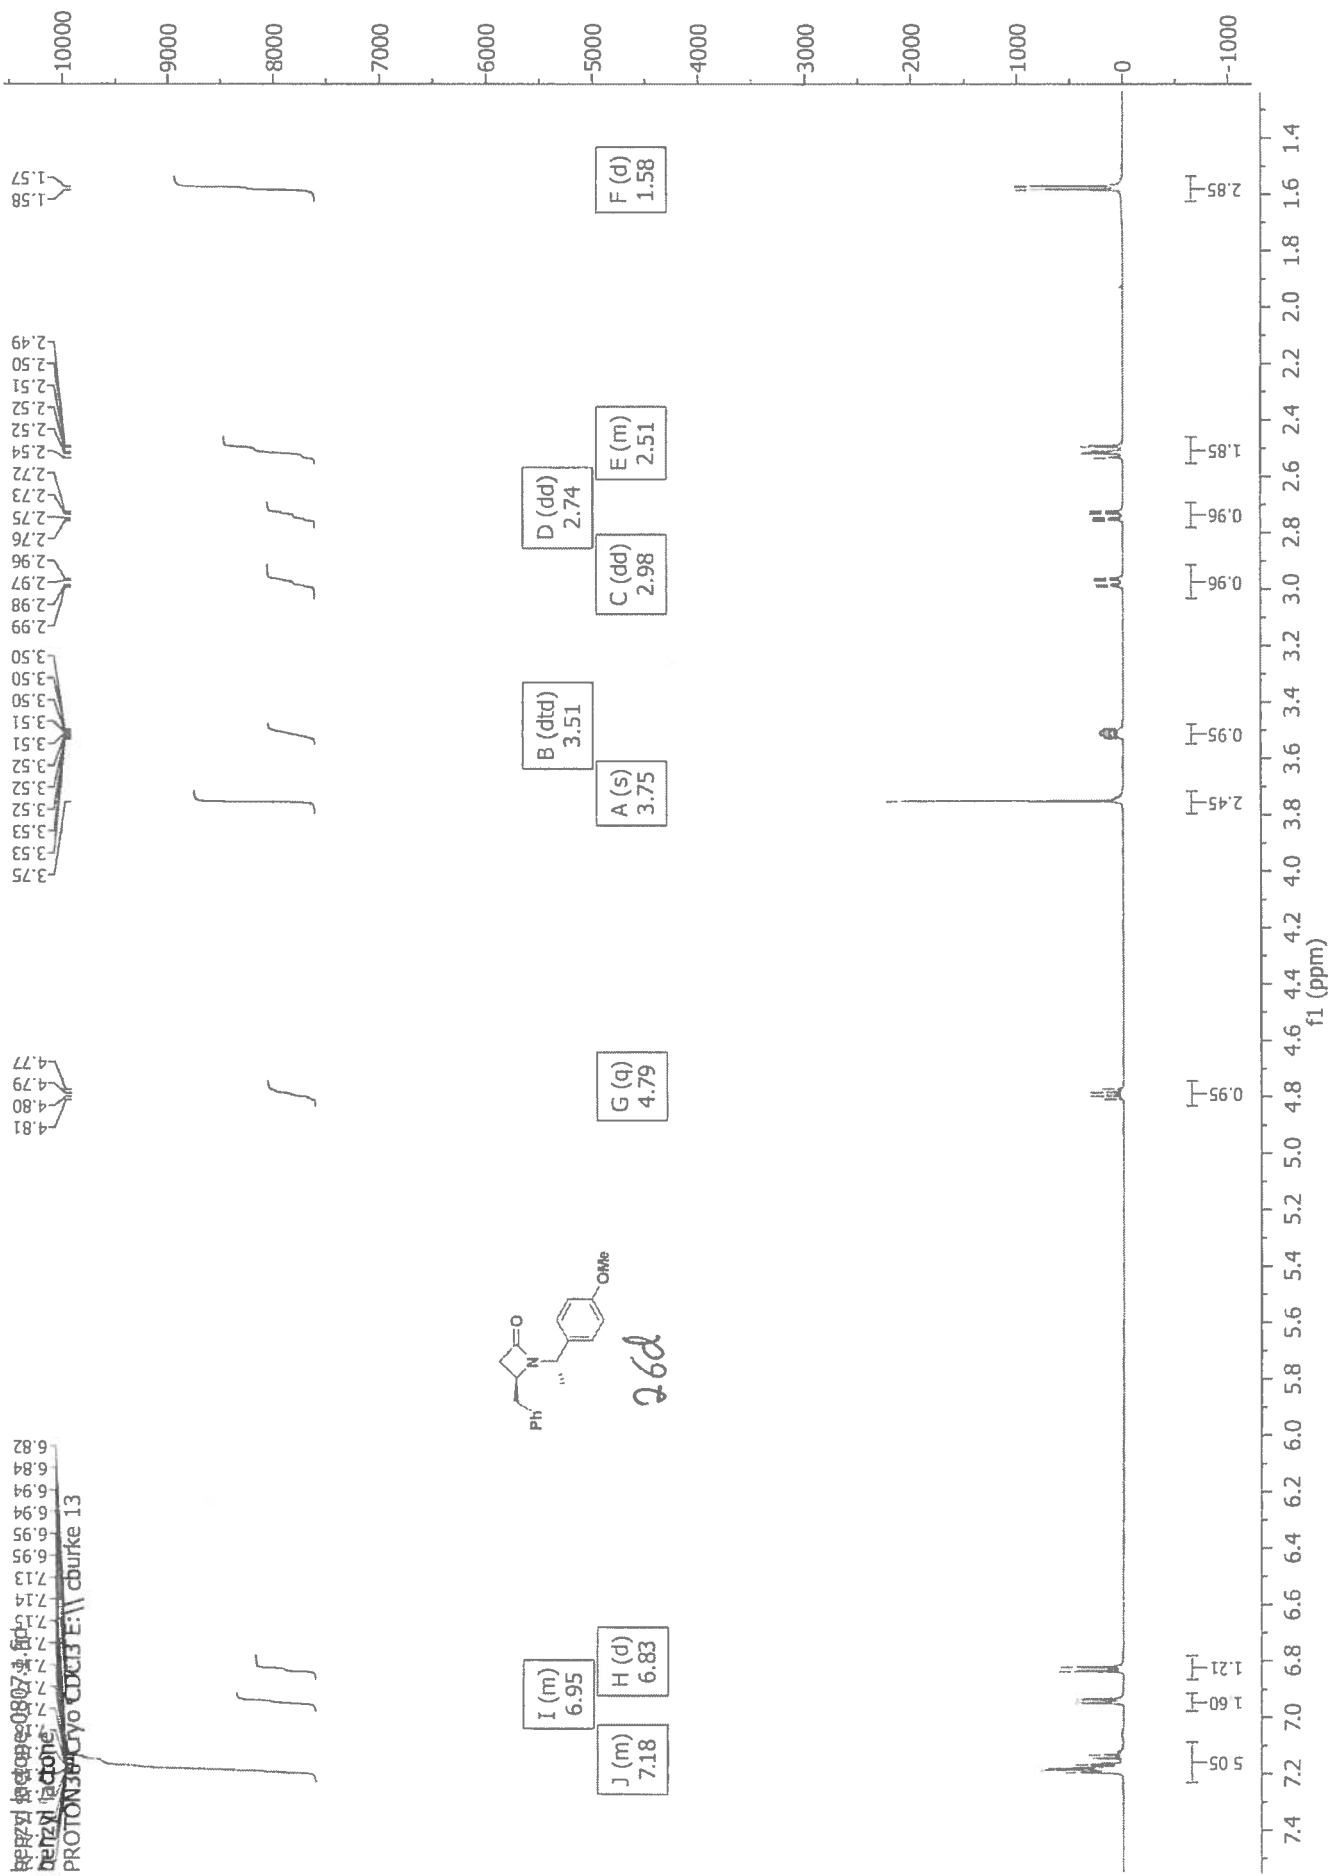

7.18  
7.17  
7.16  
7.15  
7.14  
7.13  
6.95  
6.95  
6.94  
6.94  
6.84  
6.82  
 4.81  
4.80  
4.79  
4.77  
 3.75  
3.53  
3.52  
3.52  
3.51  
3.51  
3.50  
3.50  
2.99  
2.98  
2.97  
2.76  
2.75  
2.73  
2.72  
2.54  
2.52  
2.52  
2.51  
2.50  
2.49  
 1.58  
1.57

7.18  
7.17  
7.16  
7.15  
7.14  
7.13  
6.95  
6.95  
6.94  
6.94  
6.84  
6.82  
 4.81  
4.80  
4.79  
4.77  
 3.75  
3.53  
3.52  
3.52  
3.51  
3.51  
3.50  
3.50  
2.99  
2.98  
2.97  
2.76  
2.75  
2.73  
2.72  
2.54  
2.52  
2.52  
2.51  
2.50  
2.49  
 1.58  
1.57

PROTONS: cryo cdcl3 f1: cburke 13  
 08202013  
 13072013



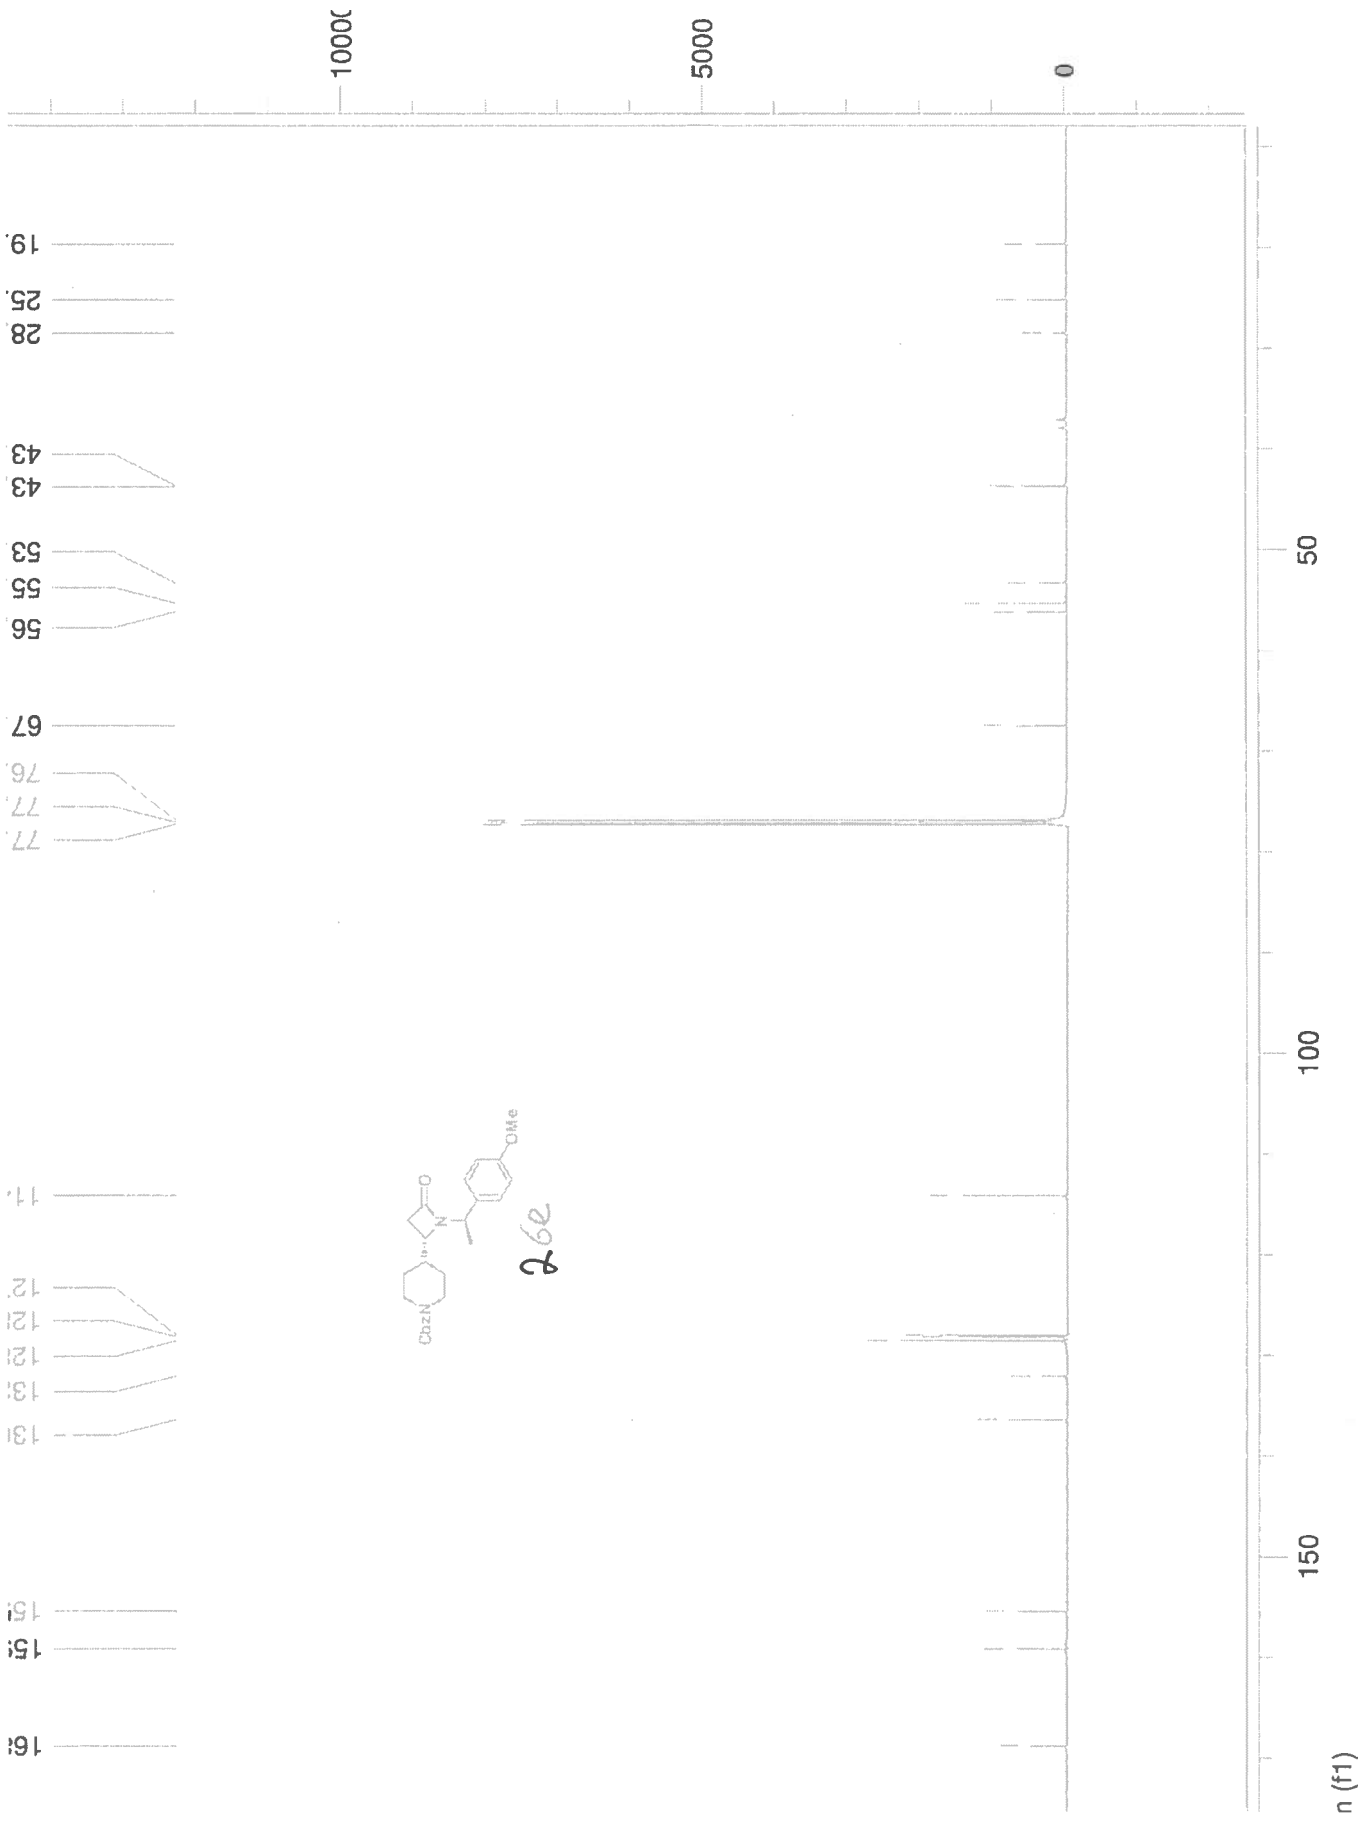



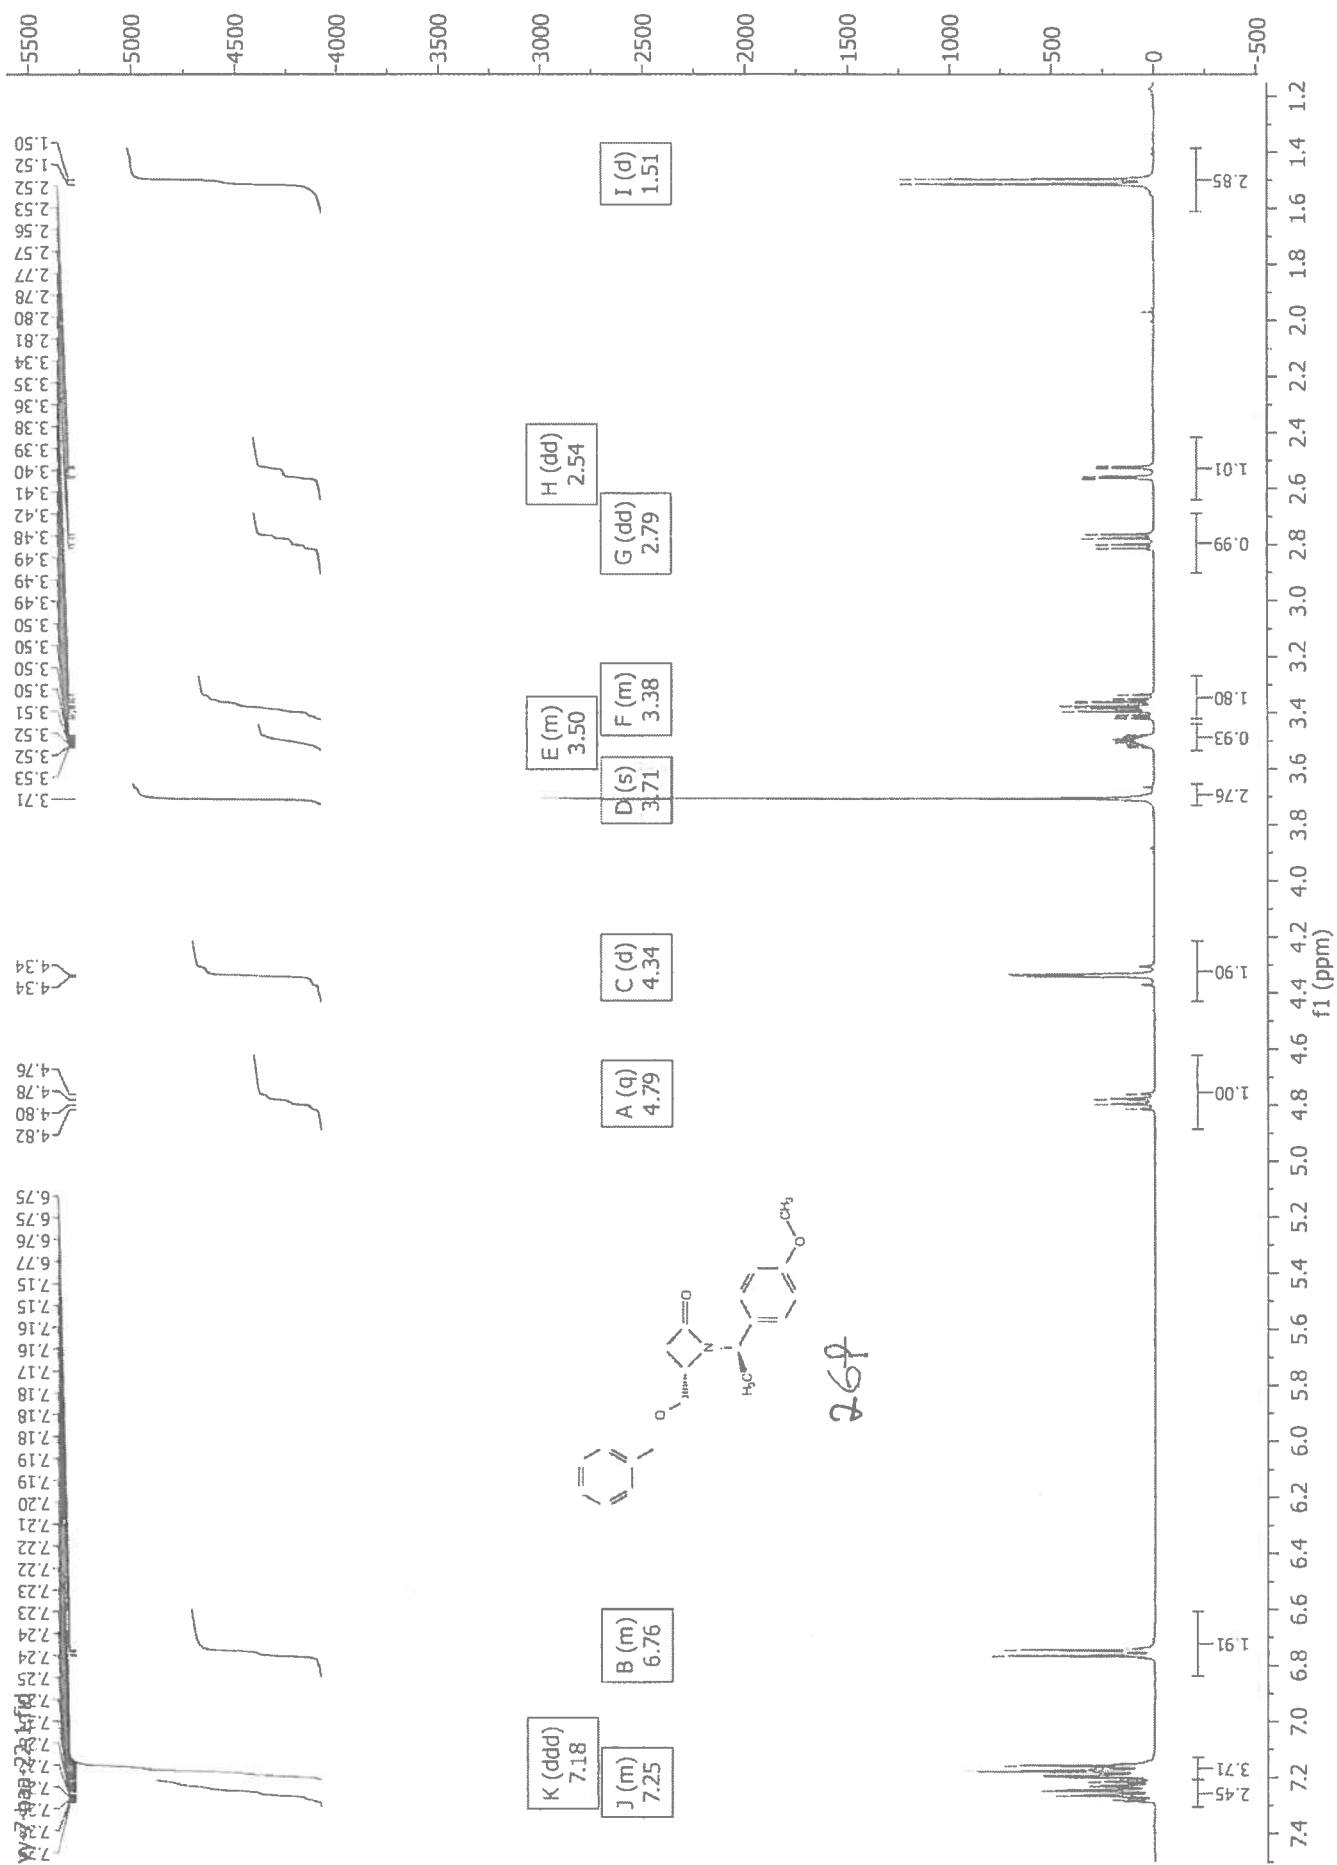

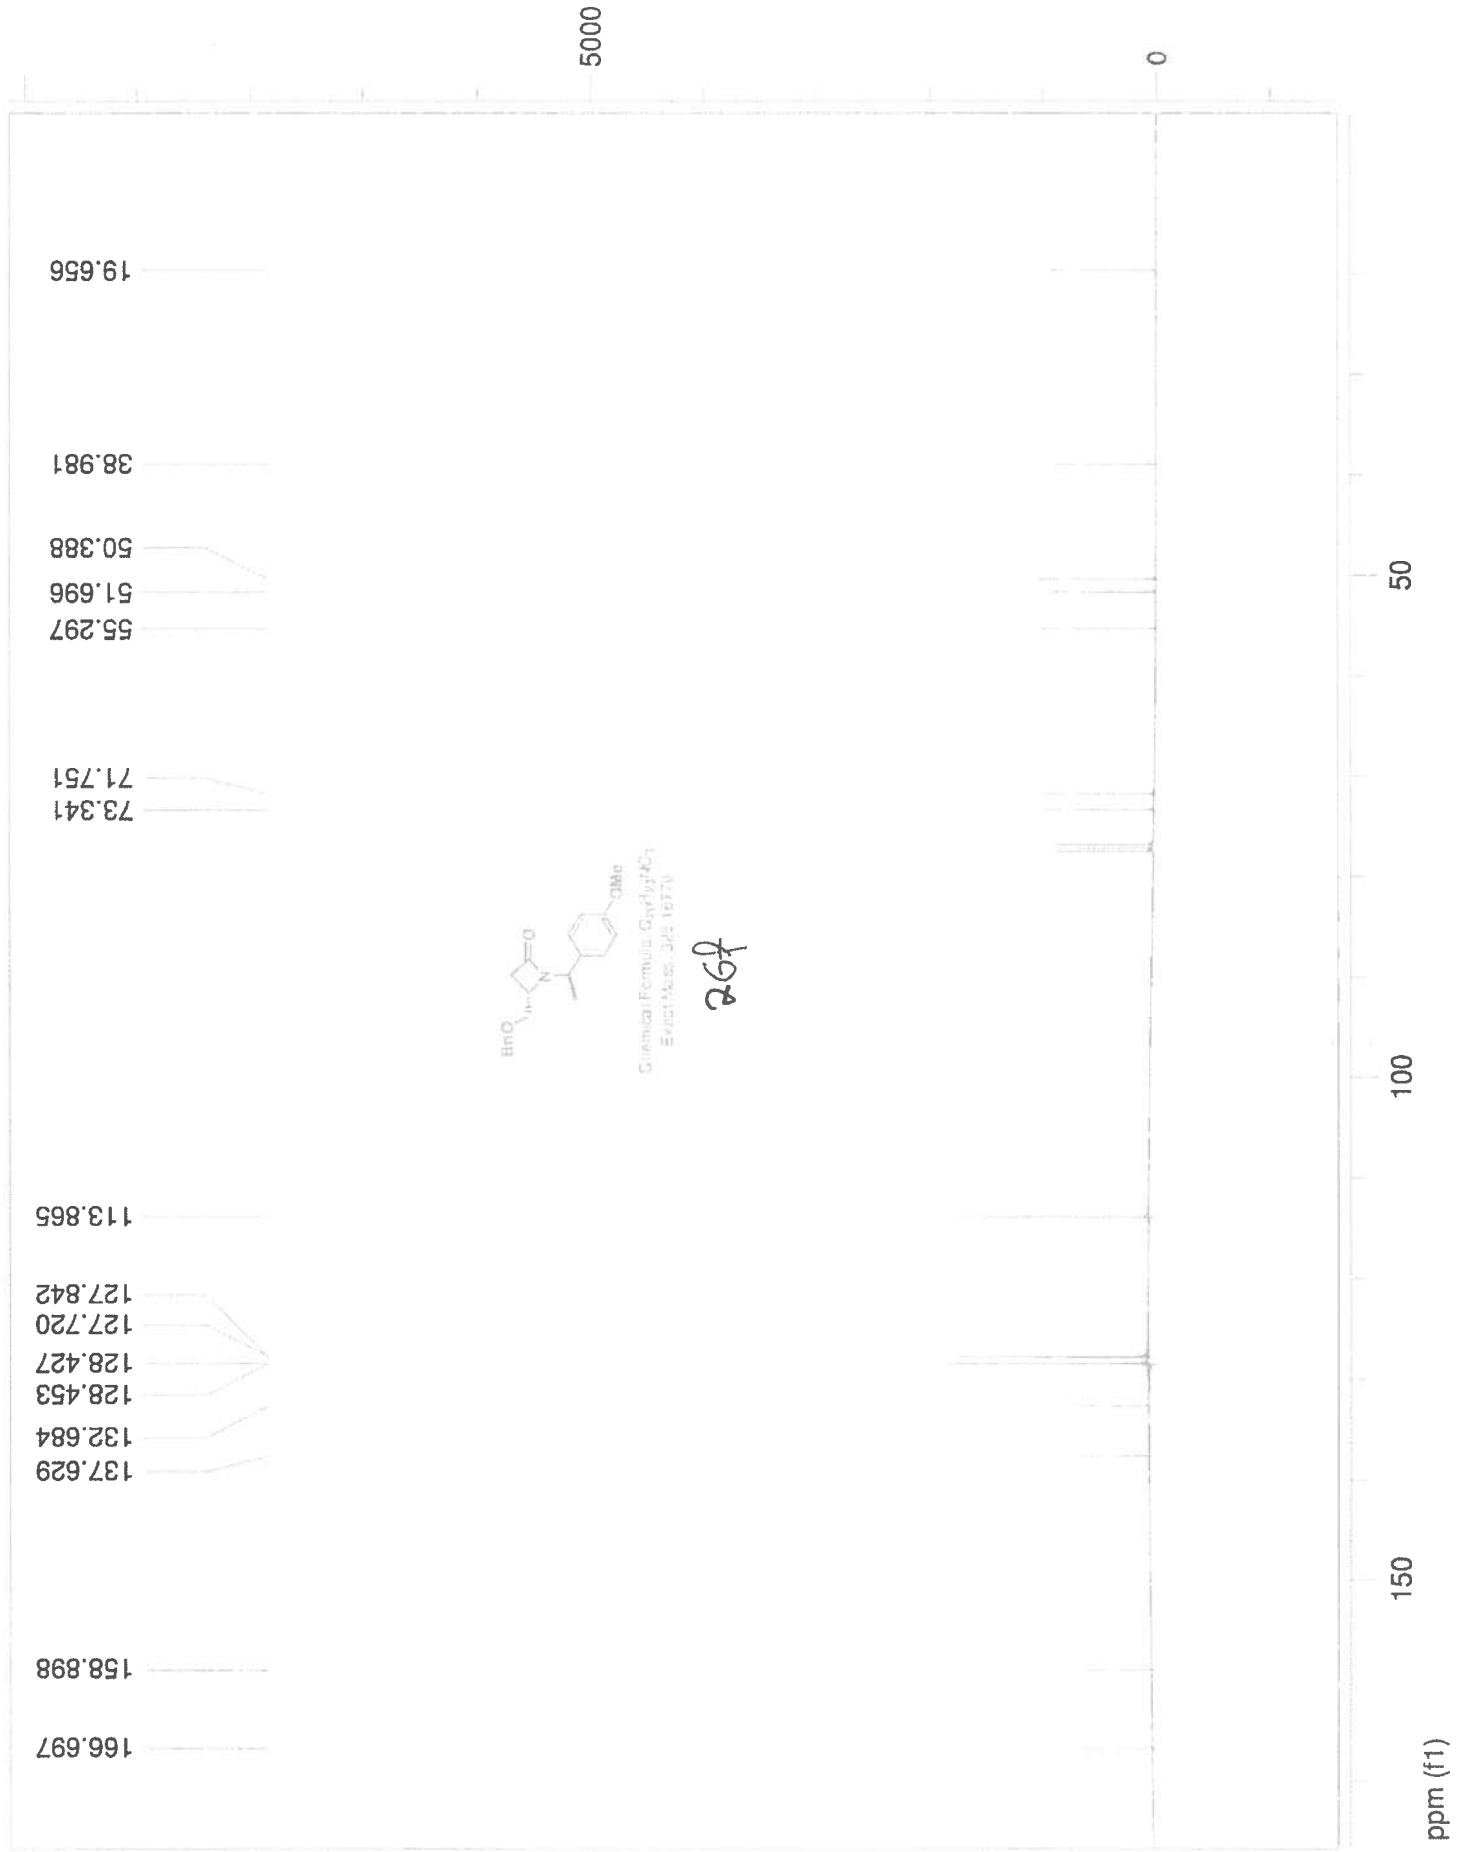



TMS-protected lactone (VMR) 0814\_2.fid  
TMS-protected lactone  
CARBON\_TCI\_1024 CDCl3 E:\Wyang IP

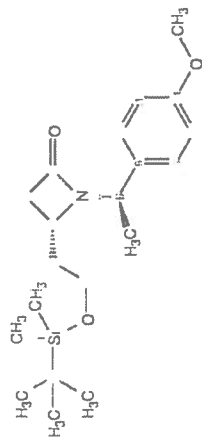

26g

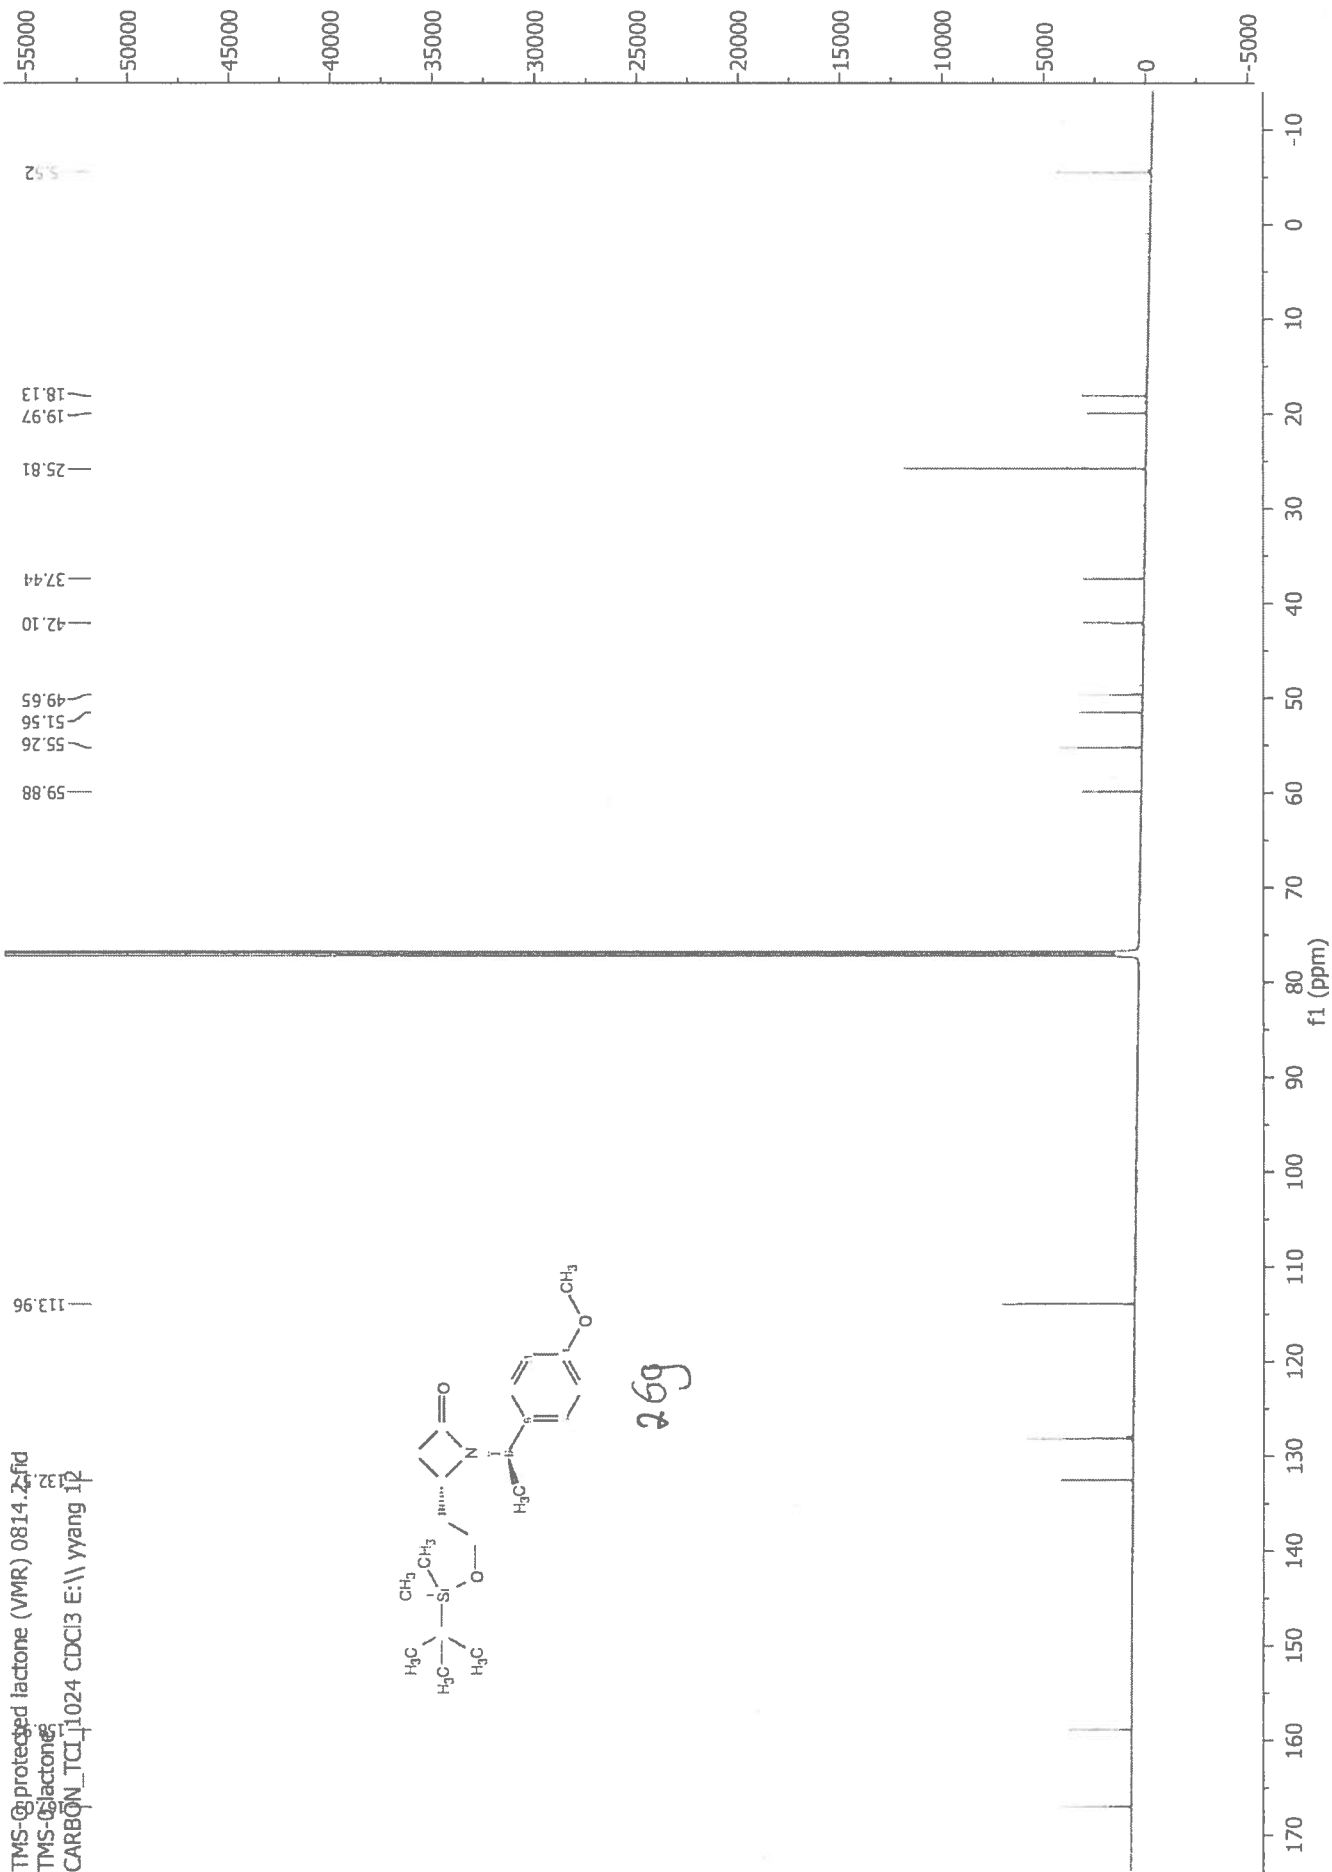

baa-29.1.fid

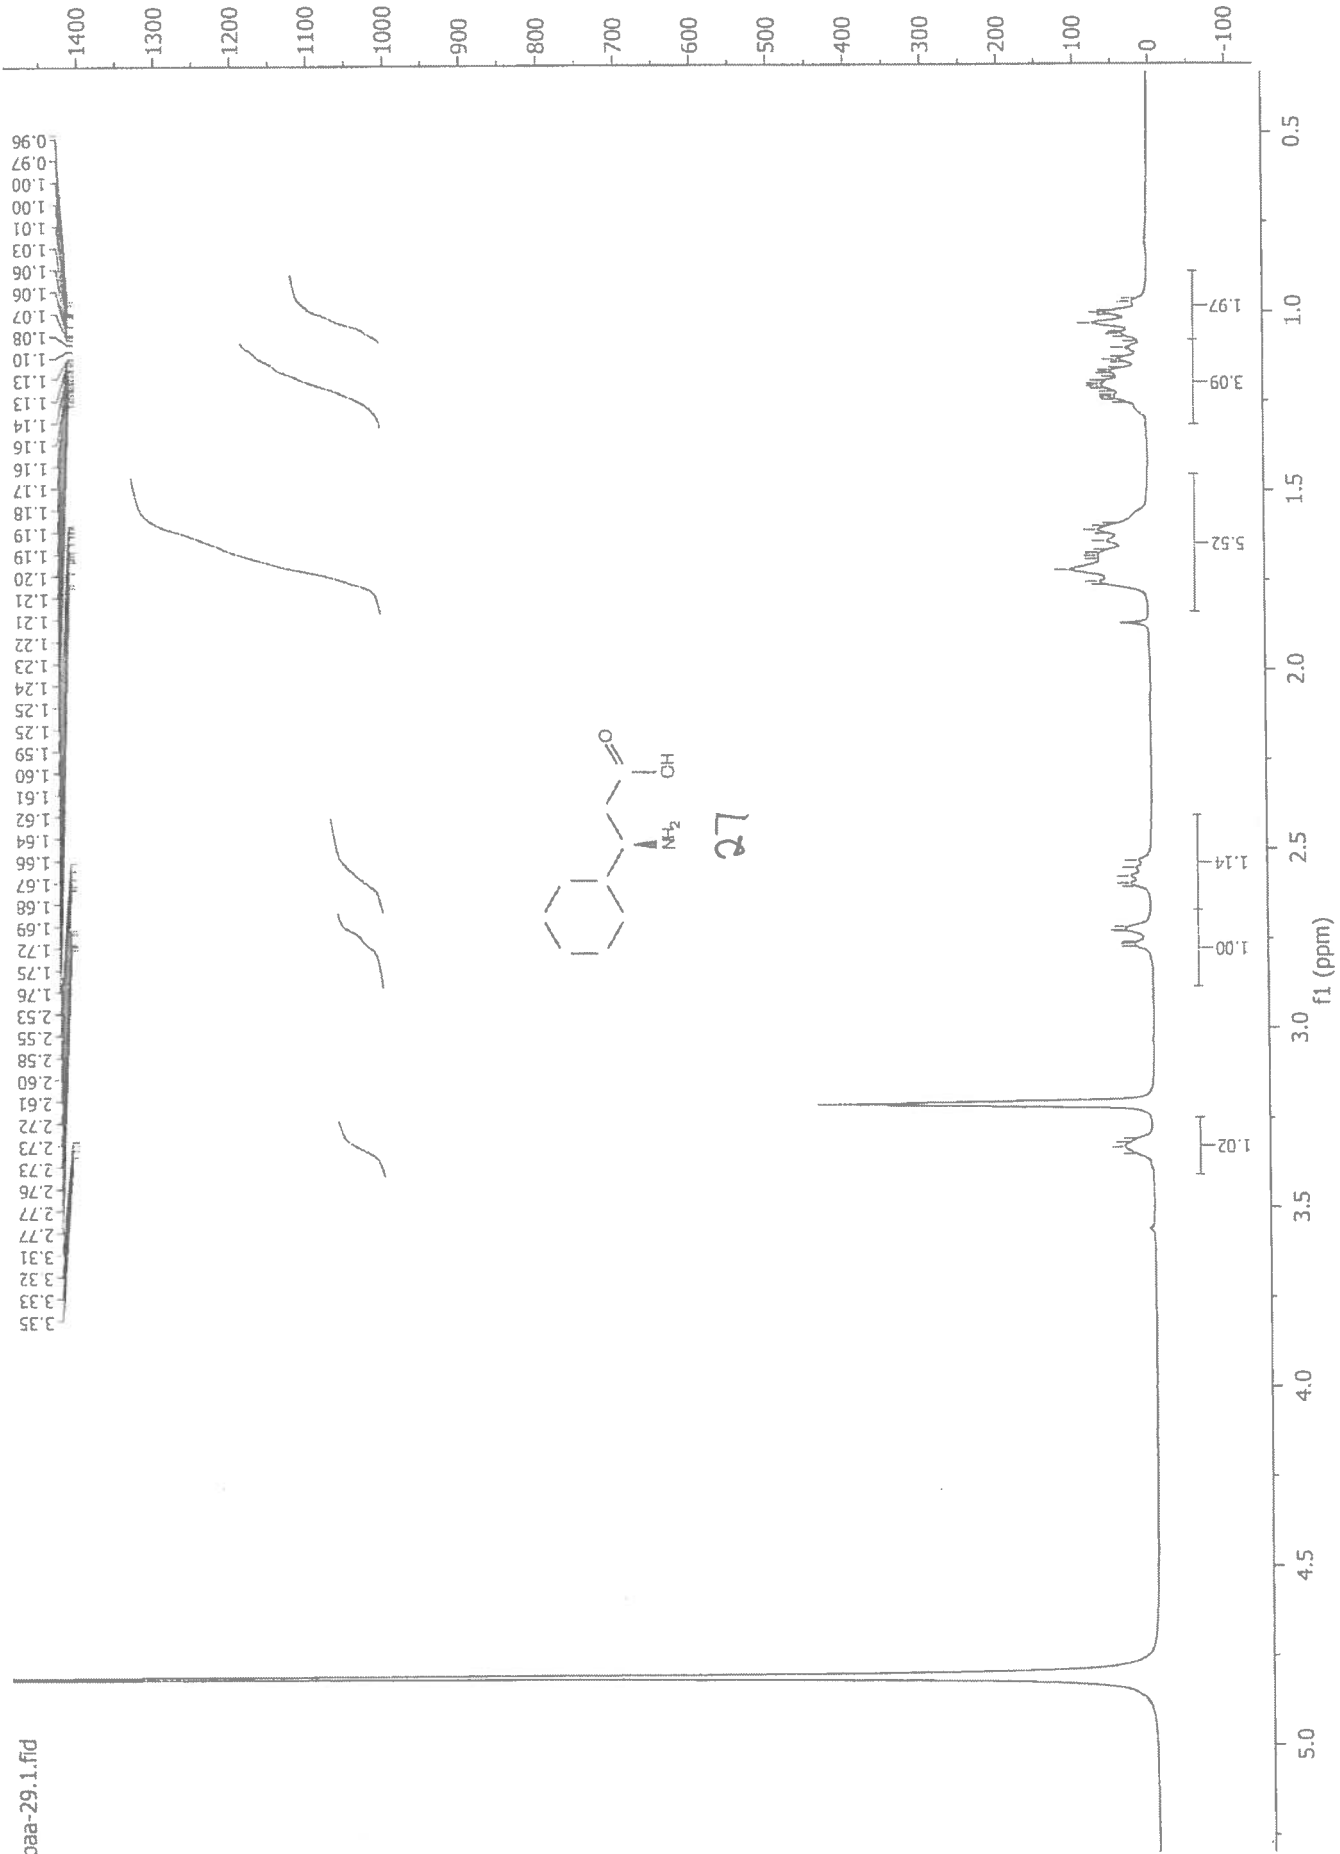

1D — baa-29.3.fid —

— 174.36

101.42  
101.40

— 54.34

— 41.33

— 34.98

29.72  
29.18  
26.97

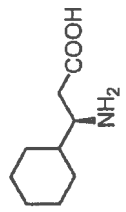

27

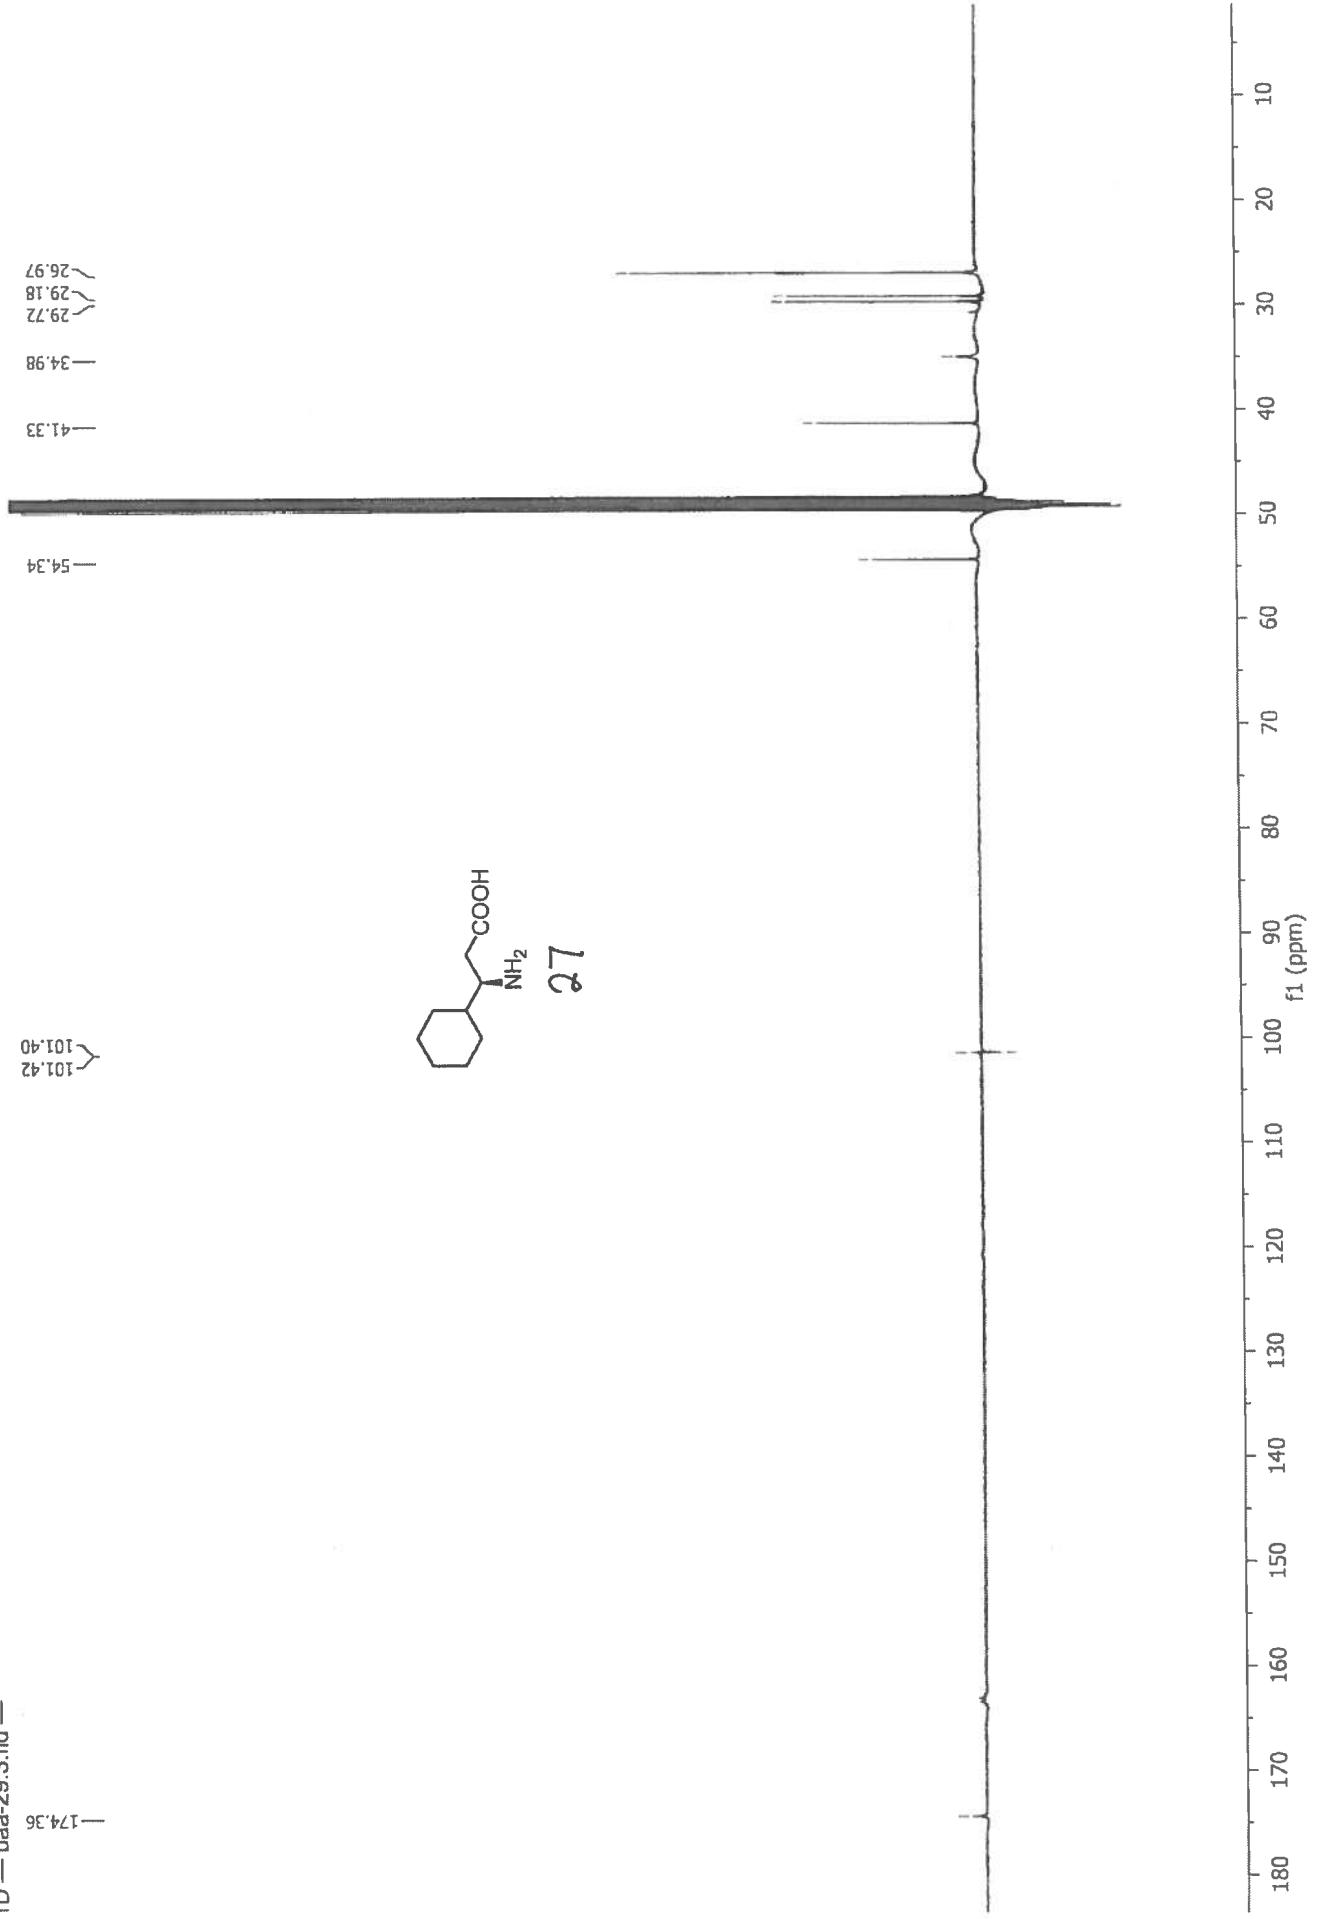

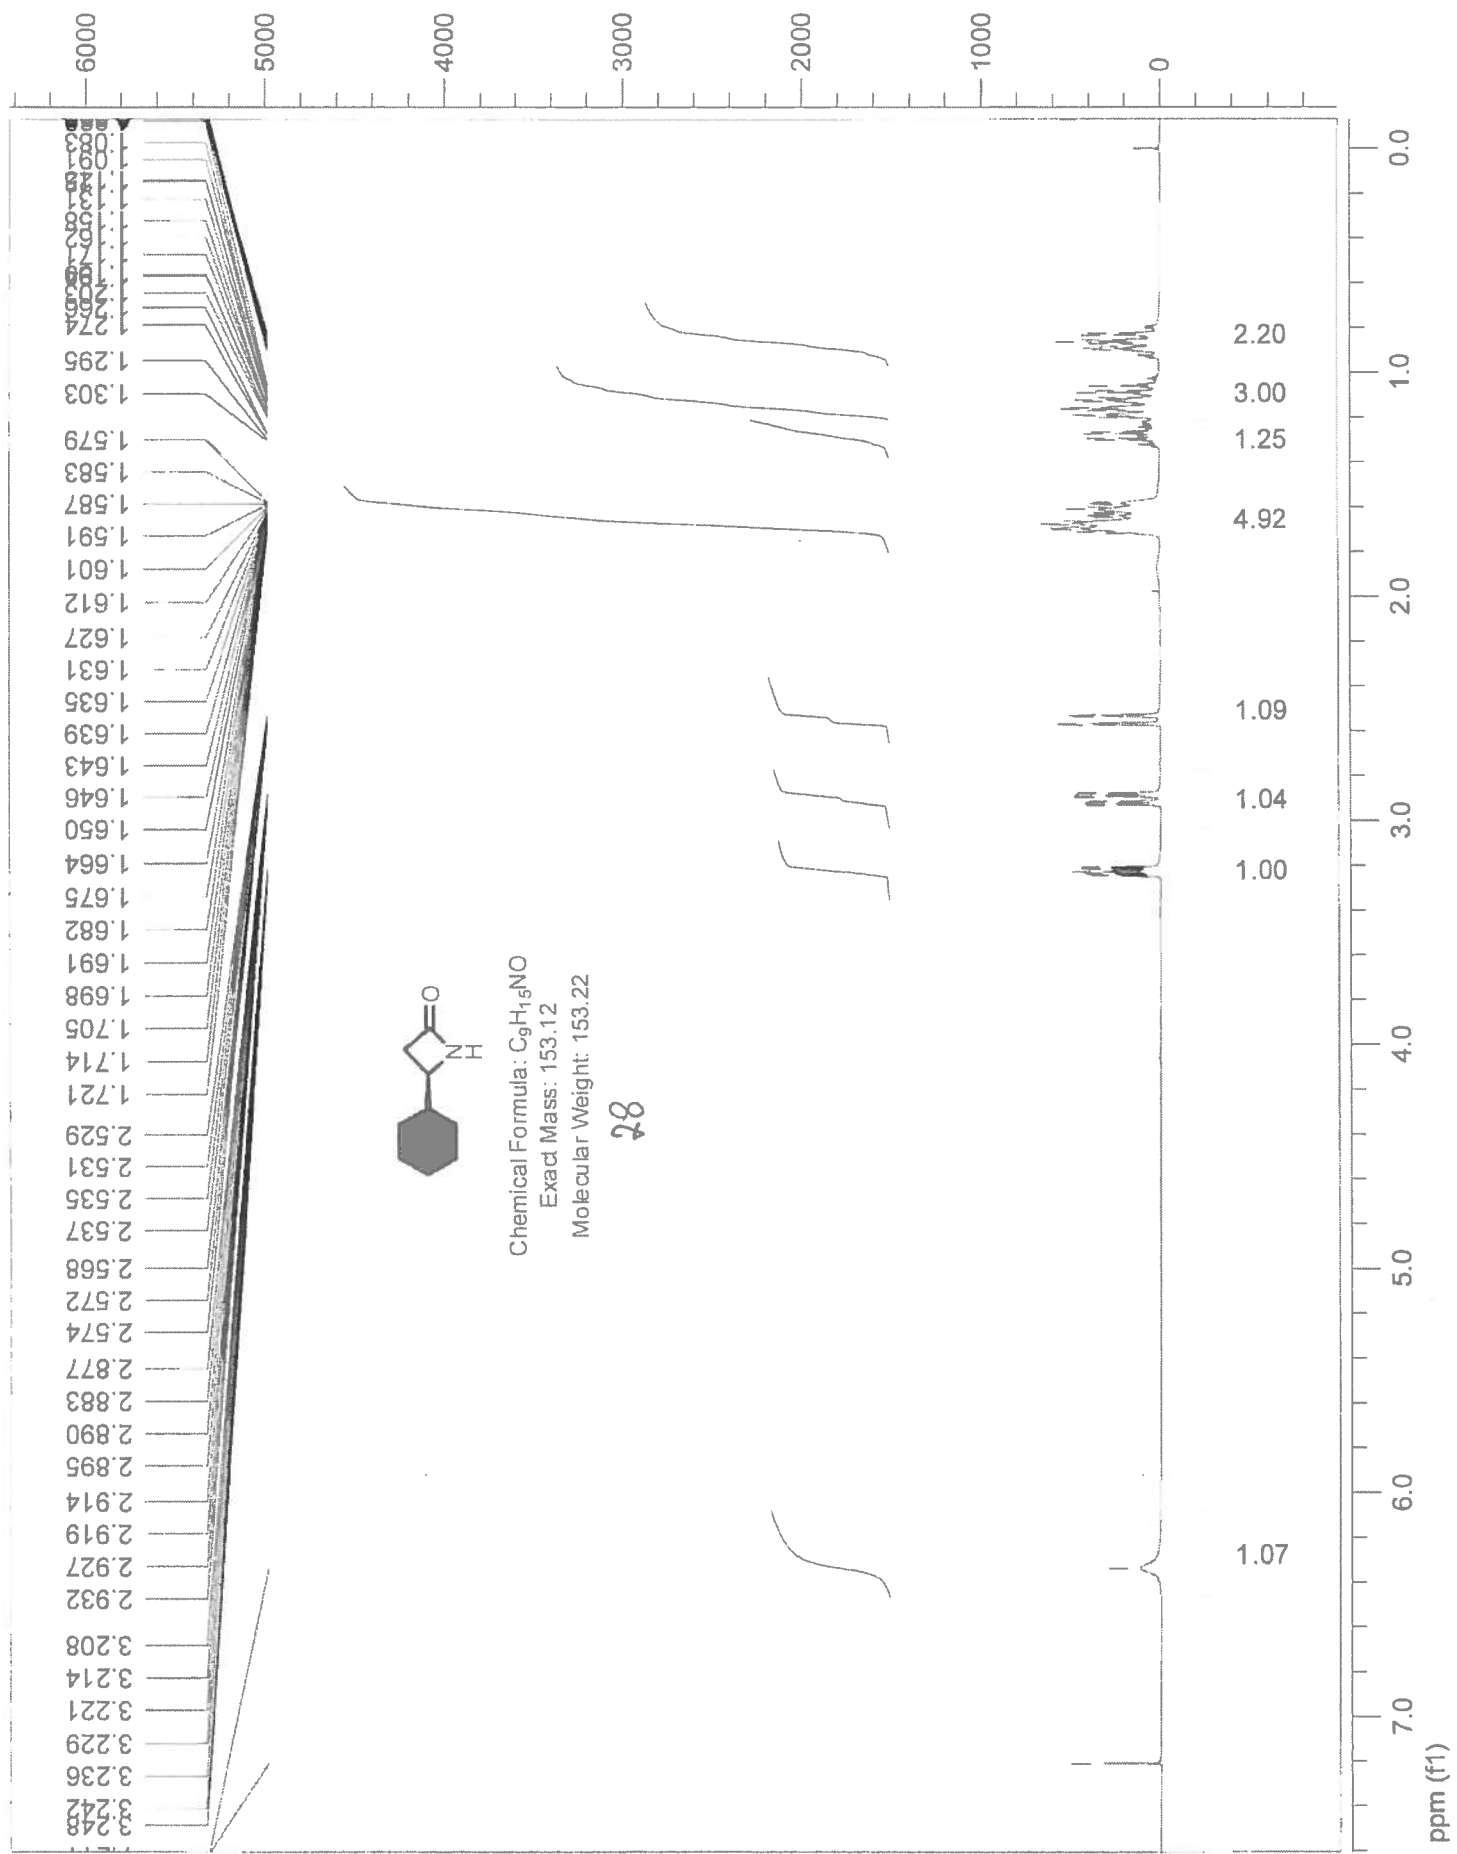

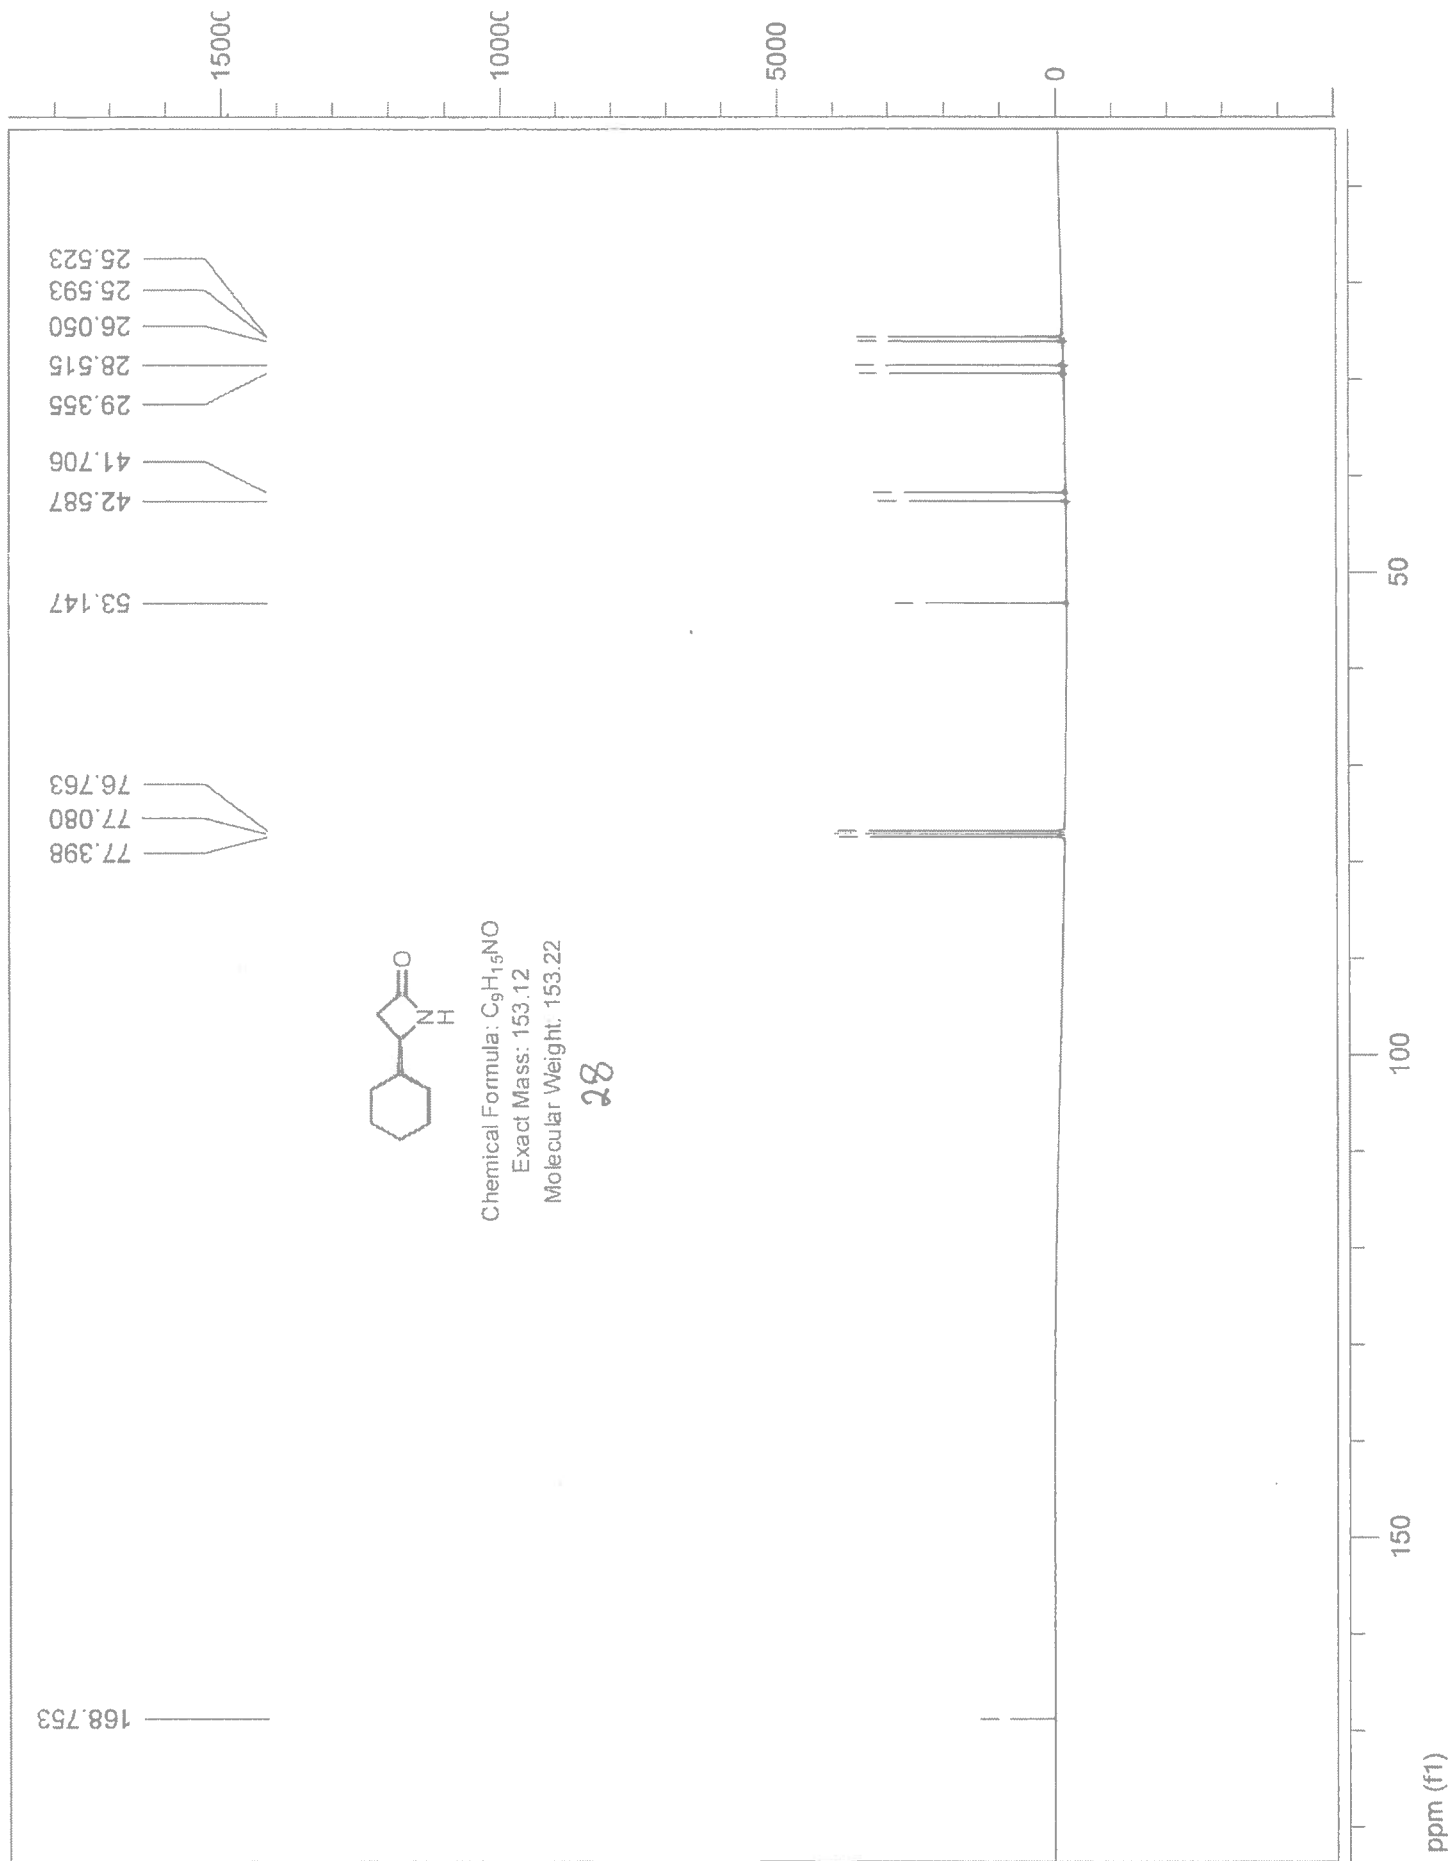

Supplement: c7ob01948c1.pdf [file c7ob01948c1.pdf]
